# Supplementary material for: Antiviral HIV-1 SERINC restriction factors disrupt virus membrane asymmetry
Source: Springer Nature journal article supplement (doi:10.1038/s41467-023-39262-2), 2023-07-20
Supplement: MOESM3 [file 41467_2023_39262_MOESM3_ESM.pdf › 41467_2023_39262_MOESM3_ESM.pdf]

**File name: Supplementary Movie 1**

**Description: The top two SERINC5 AlphaFold models suggest a possible alternating access structural rearrangement for lipid flipping.** The movie shows the view from within the lipid bilayer of the conformations predicted by the top two models. The transmembrane  $\alpha$ -helices are colored as in **Fig. 1c-e**.

**File name: Supplementary Movie 2**

**Description: The top two SERINC5 AlphaFold models suggest a possible alternating access structural rearrangement for lipid flipping.** The movie shows the extracellular view of the conformations predicted by the top two models. The transmembrane  $\alpha$ -helices are colored as in **Fig. 1c-e**.
