# Supplementary material for: Antiviral HIV-1 SERINC restriction factors disrupt virus membrane asymmetry
Source: Nat Commun. 2023 Jul 20;14:4368. doi: 10.1038/s41467-023-39262-2 (PMC10359404; doi:10.1038/s41467-023-39262-2)
Supplement: Supplementary file 7 — Source Data [file 41467_2023_39262_MOESM7_ESM.xlsx]

## Sheet: Figure 2B
	NBD-glucose
Time (s)	exp-1	exp-2	exp-3
0	1.02352	1.01991	1.02352
1	1.02656	1.01773	1.02656
2	1.02511	1.00956	1.02511
3	1.01228	1.00392	1.01228
4	1.01622	1.00544	1.01622
5	1.02958	1.01915	1.02958
6	1.0255	1.00864	1.0255
7	1.02511	1.00328	1.02511
8	1.00537	1.00727	1.00537
9	1.00711	0.998799	1.00711
10	1.02265	1.00417	1.02265
11	1.01968	1.01721	1.01968
12	1.006	1.01146	1.006
13	1.01849	1.01135	1.01849
14	1.02286	1.01765	1.02286
15	1.0075	0.996583	1.0075
16	1.01269	1.00059	1.01269
17	1.01059	1.0168	1.01059
18	1.01387	1.00761	1.01387
19	1.01653	1.00019	1.01653
20	1.00991	1.01561	1.00991
21	1.00794	0.999709	1.00794
22	1.0073	1.00511	1.0073
23	1.01177	1.01527	1.01177
24	1.00351	1.01282	1.00351
25	1.01086	1.0037	1.01086
26	1.00913	1.01426	1.00913
27	1.00137	1.00452	1.00137
28	1.0081	0.998934	1.0081
29	1.01073	1.0151	1.01073
30	1.00195	1.00611	1.00195
31	1.01197	1.01287	1.01197
32	1.01132	1.00591	1.01132
33	1.01576	1.01079	1.01576
34	1.00171	1.00347	1.00171
35	0.998867	1.00282	0.998867
36	1.00861	1.00976	1.00861
37	0.99474	1.01324	0.99474
38	1.00463	1.0052	1.00463
39	1.00157	1.00028	1.00157
40	1.00934	0.997635	1.00934
41	1.00058	0.997502	1.00058
42	1.00528	1.00084	1.00528
43	1.00066	0.999122	1.00066
44	0.996237	1.00344	0.996237
45	0.996447	1.009	0.996447
46	1.00836	1.00262	1.00836
47	0.998002	1.00131	0.998002
48	1.00309	1.00656	1.00309
49	1.00029	0.999718	1.00029
50	1.00535	1.00069	1.00535
51	0.997862	0.995078	0.997862
52	1.01127	1.00291	1.01127
53	1.01068	1.00675	1.01068
54	0.989627	1.0045	0.989627
55	1.00355	1.00502	1.00355
56	1.00797	1.00055	1.00797
57	0.993332	1.00576	0.993332
58	0.996877	1.00172	0.996877
59	1.01085	1.01078	1.01085
60	0.989466	0.995703	0.989466
61	1.00425	0.991568	1.00425
62	1.00075	1.00224	1.00075
63	0.998328	1.00604	0.998328
64	1.00211	0.996828	1.00211
65	1.00252	0.999541	1.00252
66	0.999979	0.995352	0.999979
67	1.00657	0.992886	1.00657
68	0.999766	0.997487	0.999766
69	0.994373	0.992036	0.994373
70	0.977193	1.00074	0.977193
71	1.0069	0.999418	1.0069
72	0.990724	1.0054	0.990724
73	1.00052	0.992931	1.00052
74	1.00287	0.994892	1.00287
75	1.0019	1.00181	1.0019
76	0.996331	0.998215	0.996331
77	1.00198	1.01001	1.00198
78	0.996442	1.00033	0.996442
79	0.990228	0.995435	0.990228
80	0.999418	1.00014	0.999418
81	1.00203	0.990962	1.00203
82	1.00375	0.999183	1.00375
83	0.997773	1.00711	0.997773
84	0.992768	1.00358	0.992768
85	1.00426	0.999029	1.00426
86	1.00134	0.990288	1.00134
87	0.986394	0.993039	0.986394
88	0.989886	1.00366	0.989886
89	0.987165	0.994163	0.987165
90	1.00235	0.989259	1.00235
91	0.995889	0.996911	0.995889
92	0.989242	0.997678	0.989242
93	1.00053	0.993632	1.00053
94	0.997482	0.992282	0.997482
95	1.47609	1.4167	1.47609
96	3.70743	2.66379	3.70743
97	5.2387	3.50836	5.2387
98	2.76852	1.7868	2.76852
99	0.996128	0.7797	0.996128
100	0.620609	0.527282	0.620609
101	0.618648	0.539031	0.618648
102	0.610314	0.541172	0.610314
103	0.605709	0.534076	0.605709
104	0.613201	0.530803	0.613201
105	0.603102	0.535825	0.603102
106	0.592805	0.531657	0.592805
107	0.588646	0.523175	0.588646
108	0.594574	0.533948	0.594574
109	0.599115	0.529371	0.599115
110	0.598293	0.526995	0.598293
111	0.602257	0.52956	0.602257
112	0.586154	0.530088	0.586154
113	0.592732	0.521593	0.592732
114	0.592342	0.529382	0.592342
115	0.592142	0.518934	0.592142
116	0.583502	0.509219	0.583502
117	0.588923	0.521785	0.588923
118	0.593163	0.533276	0.593163
119	0.57841	0.516961	0.57841
120	0.591745	0.520839	0.591745
121	0.585249	0.523421	0.585249
122	0.584509	0.515153	0.584509
123	0.577481	0.520507	0.577481
124	0.590258	0.5195	0.590258
125	0.582166	0.523409	0.582166
126	0.589401	0.518701	0.589401
127	0.588828	0.516663	0.588828
128	0.569808	0.513393	0.569808
129	0.575058	0.507797	0.575058
130	0.587552	0.52185	0.587552
131	0.580982	0.513321	0.580982
132	0.580677	0.511211	0.580677
133	0.567953	0.520173	0.567953
134	0.583093	0.514938	0.583093
135	0.571907	0.515513	0.571907
136	0.575686	0.508854	0.575686
137	0.577665	0.511628	0.577665
138	0.576148	0.515862	0.576148
139	0.574839	0.515247	0.574839
140	0.573056	0.5101	0.573056
141	0.580329	0.524166	0.580329
142	0.577395	0.509712	0.577395
143	0.580861	0.507456	0.580861
144	0.57488	0.514218	0.57488
145	0.567438	0.512185	0.567438
146	0.576212	0.524305	0.576212
147	0.573547	0.512691	0.573547
148	0.576925	0.511109	0.576925
149	0.55998	0.506451	0.55998
150	0.565865	0.518387	0.565865
151	0.577392	0.512968	0.577392
152	0.566886	0.511964	0.566886
153	0.565856	0.50652	0.565856
154	0.574562	0.52033	0.574562
155	0.572149	0.504148	0.572149
156	0.562843	0.51163	0.562843
157	0.570647	0.503337	0.570647
158	0.588643	0.502111	0.588643
159	0.563092	0.503627	0.563092
160	0.565812	0.526813	0.565812
161	0.559563	0.508403	0.559563
162	0.567776	0.507455	0.567776
163	0.564161	0.521841	0.564161
164	0.560007	0.511556	0.560007
165	0.557328	0.509603	0.557328
166	0.563405	0.496964	0.563405
167	0.560925	0.496058	0.560925
168	0.560148	0.511198	0.560148
169	0.562613	0.505885	0.562613
170	0.566431	0.505122	0.566431
171	0.559673	0.513427	0.559673
172	0.572525	0.497451	0.572525
173	0.563649	0.502257	0.563649
174	0.57697	0.506723	0.57697
175	0.563874	0.509943	0.563874
176	0.567236	0.513202	0.567236
177	0.561686	0.505131	0.561686
178	0.554975	0.501888	0.554975
179	0.550818	0.501419	0.550818
180	0.562162	0.514609	0.562162
181	0.557909	0.506004	0.557909
182	0.559446	0.50276	0.559446
183	0.556459	0.504918	0.556459
184	0.564962	0.501273	0.564962
185	0.555666	0.50327	0.555666
186	0.549724	0.50606	0.549724
187	0.557126	0.512427	0.557126
188	0.561055	0.490433	0.561055
189	0.5587	0.506879	0.5587
190	0.559847	0.511915	0.559847
191	0.546371	0.500131	0.546371
192	0.554572	0.505913	0.554572
193	0.553152	0.49996	0.553152
194	0.548212	0.508615	0.548212
195	0.555372	0.4987	0.555372
196	0.554132	0.512153	0.554132
197	0.547858	0.50195	0.547858
198	0.56582	0.503131	0.56582
199	0.551426	0.494413	0.551426
200	0.567274	0.48962	0.567274
201	0.551061	0.500748	0.551061
202	0.55351	0.492143	0.55351
203	0.5543	0.50604	0.5543
204	0.555708	0.509718	0.555708
205	0.561203	0.507691	0.561203
206	0.554045	0.505091	0.554045
207	0.543831	0.501877	0.543831
208	0.554813	0.504429	0.554813
209	0.560399	0.501056	0.560399
210	0.562224	0.489634	0.562224
211	0.554725	0.498455	0.554725
212	0.558048	0.50277	0.558048
213	0.556992	0.506349	0.556992
214	0.548582	0.499677	0.548582
215	0.552957	0.490072	0.552957
216	0.548175	0.497534	0.548175
217	0.544481	0.510669	0.544481
218	0.54689	0.496018	0.54689
219	0.553304	0.495954	0.553304
220	0.552328	0.498465	0.552328
221	0.546282	0.496784	0.546282
222	0.548142	0.500033	0.548142
223	0.551762	0.499325	0.551762
224	0.54223	0.500941	0.54223
225	0.550199	0.514052	0.550199
226	0.549079	0.501835	0.549079
227	0.5517	0.486459	0.5517
228	0.550135	0.497427	0.550135
229	0.543376	0.490472	0.543376
230	0.545995	0.504287	0.545995
231	0.547978	0.499675	0.547978
232	0.553465	0.483624	0.553465
233	0.55165	0.500203	0.55165
234	0.540827	0.504951	0.540827
235	0.545505	0.50136	0.545505
236	0.562771	0.495528	0.562771
237	0.544854	0.500968	0.544854
238	0.547973	0.486898	0.547973
239	0.541199	0.496682	0.541199
240	0.537991	0.499555	0.537991
241	0.551779	0.504977	0.551779
242	0.537732	0.505768	0.537732
243	0.549669	0.503246	0.549669
244	0.546299	0.499375	0.546299
245	0.546226	0.500555	0.546226
246	0.546753	0.494314	0.546753
247	0.540937	0.489102	0.540937
248	0.538958	0.500936	0.538958
249	0.543573	0.502602	0.543573
250	0.549179	0.484204	0.549179
251	0.53464	0.496396	0.53464
252	0.54478	0.489376	0.54478
253	0.539508	0.500992	0.539508
254	0.545403	0.478687	0.545403
255	0.535546	0.485453	0.535546
256	0.553497	0.493053	0.553497
257	0.544127	0.500551	0.544127
258	0.544596	0.498404	0.544596
259	0.548657	0.494559	0.548657
260	0.540329	0.48939	0.540329
261	0.542212	0.496365	0.542212
262	0.537631	0.493298	0.537631
263	0.545946	0.493259	0.545946
264	0.548249	0.49493	0.548249
265	0.538129	0.484035	0.538129
266	0.539525	0.501753	0.539525
267	0.544854	0.497439	0.544854
268	0.540351	0.474297	0.540351
269	0.539053	0.49137	0.539053
270	0.542247	0.497147	0.542247
271	0.539323	0.487597	0.539323
272	0.546398	0.491787	0.546398
273	0.535514	0.496364	0.535514
274	0.555882	0.491708	0.555882
275	0.528807	0.488058	0.528807
276	0.538221	0.486513	0.538221
277	0.530367	0.495857	0.530367
278	0.540155	0.477192	0.540155
279	0.536172	0.502653	0.536172
280	0.54232	0.488256	0.54232
281	0.54215	0.495692	0.54215
282	0.53771	0.488508	0.53771
283	0.547362	0.483759	0.547362
284	0.542185	0.490972	0.542185
285	0.533976	0.49644	0.533976
286	0.544294	0.489595	0.544294
287	0.53606	0.491843	0.53606
288	0.544455	0.492156	0.544455
289	0.534876	0.494527	0.534876
290	0.544408	0.489894	0.544408
291	0.534003	0.483887	0.534003
292	0.5488	0.496848	0.5488
293	0.531959	0.487751	0.531959
294	0.539478	0.484588	0.539478
295	0.537728	0.491237	0.537728
296	0.535378	0.495298	0.535378
297	0.537368	0.48872	0.537368
298	0.531531	0.482724	0.531531
299	0.539355	0.484011	0.539355
300	0.536826	0.49179	0.536826
301	0.540219	0.499966	0.540219
302	0.53664	0.498304	0.53664
303	0.54462	0.488695	0.54462
304	0.528927	0.497948	0.528927
305	0.544643	0.482389	0.544643
306	0.52327	0.495612	0.52327
307	0.53748	0.496673	0.53748
308	0.531516	0.484264	0.531516
309	0.536528	0.482409	0.536528
310	0.528471	0.496446	0.528471
311	0.532477	0.493225	0.532477
312	0.52903	0.497327	0.52903
313	0.531805	0.480267	0.531805
314	0.543602	0.48364	0.543602
315	0.540235	0.484423	0.540235
316	0.535144	0.494587	0.535144
317	0.529745	0.493686	0.529745
318	0.533736	0.489534	0.533736
319	0.524728	0.473543	0.524728
320	0.547328	0.491017	0.547328
321	0.526299	0.479812	0.526299
322	0.535495	0.475477	0.535495
323	0.535446	0.478692	0.535446
324	0.538835	0.481417	0.538835
325	0.527273	0.489839	0.527273
326	0.529308	0.490105	0.529308
327	0.535238	0.498236	0.535238
328	0.533331	0.503033	0.533331
329	0.532121	0.489423	0.532121
330	0.535211	0.484604	0.535211
331	0.531543	0.486352	0.531543
332	0.52804	0.487175	0.52804
333	0.53735	0.483601	0.53735
334	0.529127	0.487694	0.529127
335	0.531258	0.487902	0.531258
336	0.53657	0.491228	0.53657
337	0.547396	0.479178	0.547396
338	0.534496	0.489432	0.534496
339	0.529299	0.473376	0.529299
340	0.533749	0.480525	0.533749
341	0.537706	0.481217	0.537706
342	0.533735	0.479238	0.533735
343	0.532772	0.483135	0.532772
344	0.533591	0.483374	0.533591
345	0.52815	0.475251	0.52815
346	0.530742	0.474175	0.530742
347	0.529182	0.473837	0.529182
348	0.53846	0.467508	0.53846
349	0.529344	0.489586	0.529344
350	0.545791	0.476441	0.545791
351	0.536221	0.482444	0.536221
352	0.538033	0.484245	0.538033
353	0.538659	0.479947	0.538659
354	0.542033	0.47935	0.542033
355	0.535742	0.48049	0.535742
356	0.532479	0.477259	0.532479
357	0.53535	0.482874	0.53535
358	0.523403	0.482509	0.523403
359	0.533868	0.473058	0.533868
360	0.533246	0.488444	0.533246
361	0.540311	0.479929	0.540311
362	0.524541	0.474755	0.524541
363	0.531097	0.479062	0.531097
364	0.541886	0.480888	0.541886
365	0.540271	0.477972	0.540271
366	0.52971	0.481308	0.52971
367	0.526254	0.476489	0.526254
368	0.534938	0.477362	0.534938
369	0.52566	0.481198	0.52566
370	0.535535	0.482531	0.535535
371	0.544506	0.489401	0.544506
372	0.538548	0.485032	0.538548
373	0.528411	0.481278	0.528411
374	0.52974	0.484595	0.52974
375	0.532154	0.489206	0.532154
376	0.528565	0.481267	0.528565
377	0.530092	0.47847	0.530092
378	0.531953	0.47835	0.531953
379	0.521025	0.478285	0.521025
380	0.53938	0.470009	0.53938
381	0.525016	0.479099	0.525016
382	0.528614	0.490019	0.528614
383	0.533263	0.475873	0.533263
384	0.536684	0.483389	0.536684
385	0.521662	0.470432	0.521662
386	0.529787	0.478281	0.529787
387	0.534417	0.481029	0.534417
388	0.523792	0.47723	0.523792
389	0.529221	0.484109	0.529221
390	0.525963	0.481482	0.525963
391	0.528979	0.476679	0.528979
392	0.523595	0.484984	0.523595
393	0.527179	0.476557	0.527179
394	0.517626	0.473812	0.517626
395	0.540051	0.478319	0.540051
396	0.524755	0.472555	0.524755
397	0.532834	0.483612	0.532834
398	0.52062	0.468586	0.52062
399	0.535857	0.475313	0.535857
400	0.522521	0.474132	0.522521
401	0.526587	0.48378	0.526587
402	0.523045	0.478917	0.523045
403	0.525411	0.471925	0.525411
404	0.526415	0.470076	0.526415
405	0.524649	0.466158	0.524649
406	0.514681	0.485043	0.514681
407	0.528619	0.474847	0.528619
408	0.524572	0.481124	0.524572
409	0.52852	0.468428	0.52852
410	0.522461	0.482016	0.522461
411	0.520042	0.477552	0.520042
412	0.530324	0.483708	0.530324
413	0.527626	0.471905	0.527626
414	0.52484	0.4803	0.52484
415	0.515456	0.480669	0.515456
416	0.524224	0.476794	0.524224
417	0.531217	0.481062	0.531217
418	0.529657	0.477006	0.529657
419	0.530569	0.471314	0.530569
420	0.534632	0.47586	0.534632
421	0.523603	0.477338	0.523603
422	0.522772	0.480473	0.522772
423	0.534716	0.471552	0.534716
424	0.518718	0.478722	0.518718
425	0.533448	0.473568	0.533448
426	0.536301	0.47923	0.536301
427	0.527266	0.474744	0.527266
428	0.525012	0.474964	0.525012
429	0.527621	0.474805	0.527621
430	0.514097	0.45594	0.514097
431	0.523008	0.463654	0.523008
432	0.530148	0.475894	0.530148
433	0.521708	0.474721	0.521708
434	0.547918	0.466933	0.547918
435	0.521759	0.470197	0.521759
436	0.519437	0.468573	0.519437
437	0.550036	0.482094	0.550036
438	0.528265	0.470086	0.528265
439	0.52199	0.479797	0.52199
440	0.529493	0.474006	0.529493
441	0.529862	0.478044	0.529862
442	0.528995	0.472895	0.528995
443	0.527539	0.468175	0.527539
444	0.526319	0.478697	0.526319
445	0.529309	0.476829	0.529309
446	0.52246	0.477974	0.52246
447	0.528559	0.482036	0.528559
448	0.5252	0.466376	0.5252
449	0.51985	0.468319	0.51985
450	0.544973	0.472722	0.544973
451	0.52739	0.471017	0.52739
452	0.527429	0.46919	0.527429
453	0.52538	0.473322	0.52538
454	0.524762	0.47388	0.524762
455	0.526176	0.47753	0.526176
456	0.520618	0.471379	0.520618
457	0.51965	0.466604	0.51965
458	0.533439	0.472188	0.533439
459	0.534355	0.475401	0.534355
460	0.520305	0.472932	0.520305
461	0.521493	0.474646	0.521493
462	0.521291	0.479119	0.521291
463	0.524437	0.464561	0.524437
464	0.520305	0.46308	0.520305
465	0.522987	0.472832	0.522987
466	0.520429	0.480684	0.520429
467	0.526454	0.467292	0.526454
468	0.533818	0.468969	0.533818
469	0.515602	0.48175	0.515602
470	0.528583	0.471679	0.528583
471	0.524531	0.460667	0.524531
472	0.511767	0.475572	0.511767
473	0.524627	0.46015	0.524627
474	0.523592	0.466732	0.523592
475	0.530877	0.470676	0.530877
476	0.521977	0.473667	0.521977
477	0.525743	0.475184	0.525743
478	0.521911	0.481941	0.521911
479	0.525238	0.466013	0.525238
480	0.525459	0.462225	0.525459
481	0.524859	0.47354	0.524859
482	0.516553	0.46659	0.516553
483	0.521525	0.473647	0.521525
484	0.517267	0.47012	0.517267
485	0.517199	0.468867	0.517199
486	0.516134	0.470137	0.516134
487	0.52196	0.463761	0.52196
488	0.526038	0.474004	0.526038
489	0.516835	0.466816	0.516835
490	0.517313	0.468779	0.517313
491	0.523615	0.471138	0.523615
492	0.518793	0.465419	0.518793
493	0.524764	0.469254	0.524764
494	0.519954	0.469734	0.519954
495	0.521177	0.478019	0.521177
496	0.523561	0.476567	0.523561
497	0.515863	0.470267	0.515863
498	0.528101	0.459835	0.528101
499	0.520726	0.473305	0.520726
500	2.20555	0.461347	2.20555
501	4.04889	0.738012	4.04889
502	2.52002	1.79759	2.52002
503	0.398461	2.70115	0.398461
504	0.459856	1.58761	0.459856
505	0.294997	0.525126	0.294997
506	0.240649	0.149527	0.240649
507	0.246851	0.135028	0.246851
508	0.244673	0.130684	0.244673
509	0.243848	0.12234	0.243848
510	0.247771	0.1247	0.247771
511	0.247508	0.120148	0.247508
512	0.245907	0.122494	0.245907
513	0.241751	0.124214	0.241751
514	0.244751	0.125348	0.244751
515	0.244448	0.12226	0.244448
516	0.243773	0.122715	0.243773
517	0.244591	0.126994	0.244591
518	0.239837	0.126158	0.239837
519	0.248297	0.125054	0.248297
520	0.247382	0.122979	0.247382
521	0.250656	0.124028	0.250656
522	0.244598	0.124636	0.244598
523	0.254442	0.124216	0.254442
524	0.248269	0.120857	0.248269
525	0.244897	0.125162	0.244897
526	0.256586	0.121726	0.256586
527	0.255259	0.124222	0.255259
528	0.256557	0.121352	0.256557
529	0.246117	0.123686	0.246117
530	0.250178	0.123817	0.250178
531	0.252121	0.119144	0.252121
532	0.249134	0.123852	0.249134
533	0.252459	0.123819	0.252459
534	0.252253	0.126717	0.252253
535	0.257284	0.123957	0.257284
536	0.246687	0.124951	0.246687
537	0.249963	0.122863	0.249963
538	0.256951	0.120521	0.256951
539	0.261462	0.127122	0.261462
540	0.250296	0.12758	0.250296
541	0.25357	0.122711	0.25357
542	0.251348	0.125856	0.251348
543	0.261677	0.122849	0.261677
544	0.250648	0.12073	0.250648
545	0.248687	0.123004	0.248687
546	0.254206	0.125943	0.254206
547	0.24762	0.12664	0.24762
548	0.254527	0.125074	0.254527
549	0.252863	0.124167	0.252863
550	0.257121	0.126795	0.257121
551	0.256698	0.125405	0.256698
552	0.255032	0.126848	0.255032
553	0.260782	0.120818	0.260782
554	0.252813	0.127404	0.252813
555	0.253265	0.124422	0.253265
556	0.253379	0.125751	0.253379
557	0.25698	0.124983	0.25698
558	0.254884	0.125472	0.254884
559	0.254238	0.12367	0.254238
560	0.254707	0.125976	0.254707
561	0.25304	0.122844	0.25304
562	0.251596	0.126263	0.251596
563	0.254552	0.124216	0.254552
564	0.254751	0.125037	0.254751
565	0.253586	0.124361	0.253586
566	0.25289	0.123199	0.25289
567	0.256021	0.129208	0.256021
568	0.252919	0.124968	0.252919
569	0.26041	0.122627	0.26041
570	0.257741	0.12354	0.257741
571	0.252757	0.123755	0.252757
572	0.255775	0.124149	0.255775
573	0.263537	0.126894	0.263537
574	0.255256	0.127936	0.255256
575	0.25481	0.124207	0.25481
576	0.266644	0.13007	0.266644
577	0.257517	0.126201	0.257517
578	0.252884	0.122337	0.252884
579	0.260962	0.128354	0.260962
580	0.27466	0.122208	0.27466
581	0.263674	0.126132	0.263674
582	0.257209	0.123154	0.257209
583	0.26297	0.124585	0.26297
584	0.260253	0.124787	0.260253
585	0.257734	0.123928	0.257734
586	0.260749	0.124564	0.260749
587	0.257006	0.126306	0.257006
588	0.260192	0.132974	0.260192
589	0.257489	0.127863	0.257489
590	0.258964	0.125266	0.258964
591	0.256335	0.127418	0.256335
592	0.272231	0.127278	0.272231
593	0.260436	0.124239	0.260436
594	0.260819	0.125883	0.260819
595	0.252239	0.124369	0.252239
596	0.26004	0.126645	0.26004
597	0.257466	0.126264	0.257466
598	0.263607	0.123471	0.263607
599	0.257228	0.126687	0.257228
600	0.258951	0.126058	0.258951
	#DIV/0!	#DIV/0!	#DIV/0!
	#DIV/0!	#DIV/0!	#DIV/0!
	#DIV/0!	#DIV/0!	#DIV/0!
	#DIV/0!	#DIV/0!	#DIV/0!
	#DIV/0!	#DIV/0!	#DIV/0!
	#DIV/0!	#DIV/0!	#DIV/0!
	#DIV/0!	#DIV/0!	#DIV/0!
	#DIV/0!	#DIV/0!	#DIV/0!
	#DIV/0!	#DIV/0!	#DIV/0!
	#DIV/0!	#DIV/0!	#DIV/0!
	#DIV/0!	#DIV/0!	#DIV/0!
	#DIV/0!	#DIV/0!	#DIV/0!
	#DIV/0!	#DIV/0!	#DIV/0!
	#DIV/0!	#DIV/0!	#DIV/0!
	#DIV/0!	#DIV/0!	#DIV/0!
	#DIV/0!	#DIV/0!	#DIV/0!
	#DIV/0!	#DIV/0!	#DIV/0!
	#DIV/0!	#DIV/0!	#DIV/0!
	#DIV/0!	#DIV/0!	#DIV/0!
	#DIV/0!	#DIV/0!	#DIV/0!
	#DIV/0!	#DIV/0!	#DIV/0!
	#DIV/0!	#DIV/0!	#DIV/0!
	#DIV/0!	#DIV/0!	#DIV/0!
	#DIV/0!	#DIV/0!	#DIV/0!
	#DIV/0!	#DIV/0!	#DIV/0!
	#DIV/0!	#DIV/0!	#DIV/0!
	#DIV/0!	#DIV/0!	#DIV/0!
	#DIV/0!	#DIV/0!	#DIV/0!
	#DIV/0!	#DIV/0!	#DIV/0!
	#DIV/0!	#DIV/0!	#DIV/0!
	#DIV/0!	#DIV/0!	#DIV/0!
	#DIV/0!	#DIV/0!	#DIV/0!
	#DIV/0!	#DIV/0!	#DIV/0!
	#DIV/0!	#DIV/0!	#DIV/0!
	#DIV/0!	#DIV/0!	#DIV/0!
	#DIV/0!	#DIV/0!	#DIV/0!
	#DIV/0!	#DIV/0!	#DIV/0!
	#DIV/0!	#DIV/0!	#DIV/0!
	#DIV/0!	#DIV/0!	#DIV/0!
	#DIV/0!	#DIV/0!	#DIV/0!
	#DIV/0!	#DIV/0!	#DIV/0!
	#DIV/0!	#DIV/0!	#DIV/0!
	#DIV/0!	#DIV/0!	#DIV/0!
	#DIV/0!	#DIV/0!	#DIV/0!
	#DIV/0!	#DIV/0!	#DIV/0!
	#DIV/0!	#DIV/0!	#DIV/0!
	#DIV/0!	#DIV/0!	#DIV/0!
	#DIV/0!	#DIV/0!	#DIV/0!
	#DIV/0!	#DIV/0!	#DIV/0!
	#DIV/0!	#DIV/0!	#DIV/0!
	#DIV/0!	#DIV/0!	#DIV/0!
	#DIV/0!	#DIV/0!	#DIV/0!
	#DIV/0!	#DIV/0!	#DIV/0!
	#DIV/0!	#DIV/0!	#DIV/0!
	#DIV/0!	#DIV/0!	#DIV/0!
	#DIV/0!	#DIV/0!	#DIV/0!
	#DIV/0!	#DIV/0!	#DIV/0!
	#DIV/0!	#DIV/0!	#DIV/0!
	#DIV/0!	#DIV/0!	#DIV/0!
	#DIV/0!	#DIV/0!	#DIV/0!
	#DIV/0!	#DIV/0!	#DIV/0!
	#DIV/0!	#DIV/0!	#DIV/0!
	#DIV/0!	#DIV/0!	#DIV/0!
	#DIV/0!	#DIV/0!	#DIV/0!
	#DIV/0!	#DIV/0!	#DIV/0!
	#DIV/0!	#DIV/0!	#DIV/0!
	#DIV/0!	#DIV/0!	#DIV/0!
	#DIV/0!	#DIV/0!	#DIV/0!
	#DIV/0!	#DIV/0!	#DIV/0!
	#DIV/0!	#DIV/0!	#DIV/0!
	#DIV/0!	#DIV/0!	#DIV/0!
	#DIV/0!	#DIV/0!	#DIV/0!
	#DIV/0!	#DIV/0!	#DIV/0!
	#DIV/0!	#DIV/0!	#DIV/0!
	#DIV/0!	#DIV/0!	#DIV/0!
	#DIV/0!	#DIV/0!	#DIV/0!
	#DIV/0!	#DIV/0!	#DIV/0!
	#DIV/0!	#DIV/0!	#DIV/0!
	#DIV/0!	#DIV/0!	#DIV/0!
	#DIV/0!	#DIV/0!	#DIV/0!
	#DIV/0!	#DIV/0!	#DIV/0!
	#DIV/0!	#DIV/0!	#DIV/0!
	#DIV/0!	#DIV/0!	#DIV/0!
	#DIV/0!	#DIV/0!	#DIV/0!
	#DIV/0!	#DIV/0!	#DIV/0!
	#DIV/0!	#DIV/0!	#DIV/0!
	#DIV/0!	#DIV/0!	#DIV/0!
	#DIV/0!	#DIV/0!	#DIV/0!
	#DIV/0!	#DIV/0!	#DIV/0!
	#DIV/0!	#DIV/0!	#DIV/0!
	#DIV/0!	#DIV/0!	#DIV/0!
	#DIV/0!	#DIV/0!	#DIV/0!
	#DIV/0!	#DIV/0!	#DIV/0!
	#DIV/0!	#DIV/0!	#DIV/0!
	#DIV/0!	#DIV/0!	#DIV/0!
	#DIV/0!	#DIV/0!	#DIV/0!
	#DIV/0!	#DIV/0!	#DIV/0!
	#DIV/0!	#DIV/0!	#DIV/0!
	#DIV/0!	#DIV/0!	#DIV/0!
	#DIV/0!	#DIV/0!	#DIV/0!
	#DIV/0!	#DIV/0!	#DIV/0!
	#DIV/0!	#DIV/0!	#DIV/0!
	#DIV/0!	#DIV/0!	#DIV/0!
	#DIV/0!	#DIV/0!	#DIV/0!
	#DIV/0!	#DIV/0!	#DIV/0!
	#DIV/0!	#DIV/0!	#DIV/0!
	#DIV/0!	#DIV/0!	#DIV/0!
	#DIV/0!	#DIV/0!	#DIV/0!
	#DIV/0!	#DIV/0!	#DIV/0!
	#DIV/0!	#DIV/0!	#DIV/0!
	#DIV/0!	#DIV/0!	#DIV/0!
	#DIV/0!	#DIV/0!	#DIV/0!
	#DIV/0!	#DIV/0!	#DIV/0!
	#DIV/0!	#DIV/0!	#DIV/0!
	#DIV/0!	#DIV/0!	#DIV/0!
	#DIV/0!	#DIV/0!	#DIV/0!
	#DIV/0!	#DIV/0!	#DIV/0!
	#DIV/0!	#DIV/0!	#DIV/0!
	#DIV/0!	#DIV/0!	#DIV/0!
	#DIV/0!	#DIV/0!	#DIV/0!
	#DIV/0!	#DIV/0!	#DIV/0!
	#DIV/0!	#DIV/0!	#DIV/0!
	#DIV/0!	#DIV/0!	#DIV/0!
	#DIV/0!	#DIV/0!	#DIV/0!
	#DIV/0!	#DIV/0!	#DIV/0!
	#DIV/0!	#DIV/0!	#DIV/0!
	#DIV/0!	#DIV/0!	#DIV/0!
	#DIV/0!	#DIV/0!	#DIV/0!
	#DIV/0!	#DIV/0!	#DIV/0!
	#DIV/0!	#DIV/0!	#DIV/0!
	#DIV/0!	#DIV/0!	#DIV/0!
	#DIV/0!	#DIV/0!	#DIV/0!
	#DIV/0!	#DIV/0!	#DIV/0!
	#DIV/0!	#DIV/0!	#DIV/0!
	#DIV/0!	#DIV/0!	#DIV/0!
	#DIV/0!	#DIV/0!	#DIV/0!
	#DIV/0!	#DIV/0!	#DIV/0!
	#DIV/0!	#DIV/0!	#DIV/0!
	#DIV/0!	#DIV/0!	#DIV/0!
	#DIV/0!	#DIV/0!	#DIV/0!
	#DIV/0!	#DIV/0!	#DIV/0!
	#DIV/0!	#DIV/0!	#DIV/0!
	#DIV/0!	#DIV/0!	#DIV/0!
	#DIV/0!	#DIV/0!	#DIV/0!
	#DIV/0!	#DIV/0!	#DIV/0!
	#DIV/0!	#DIV/0!	#DIV/0!
	#DIV/0!	#DIV/0!	#DIV/0!
	#DIV/0!	#DIV/0!	#DIV/0!
	#DIV/0!	#DIV/0!	#DIV/0!
	#DIV/0!	#DIV/0!	#DIV/0!
	#DIV/0!	#DIV/0!	#DIV/0!
	#DIV/0!	#DIV/0!	#DIV/0!
	#DIV/0!	#DIV/0!	#DIV/0!
	#DIV/0!	#DIV/0!	#DIV/0!
	#DIV/0!	#DIV/0!	#DIV/0!
	#DIV/0!	#DIV/0!	#DIV/0!
	#DIV/0!	#DIV/0!	#DIV/0!
	#DIV/0!	#DIV/0!	#DIV/0!
	#DIV/0!	#DIV/0!	#DIV/0!
	#DIV/0!	#DIV/0!	#DIV/0!
	#DIV/0!	#DIV/0!	#DIV/0!
	#DIV/0!	#DIV/0!	#DIV/0!
	#DIV/0!	#DIV/0!	#DIV/0!
	#DIV/0!	#DIV/0!	#DIV/0!
	#DIV/0!	#DIV/0!	#DIV/0!
	#DIV/0!	#DIV/0!	#DIV/0!
	#DIV/0!	#DIV/0!	#DIV/0!
	#DIV/0!	#DIV/0!	#DIV/0!
	#DIV/0!	#DIV/0!	#DIV/0!
	#DIV/0!	#DIV/0!	#DIV/0!
	#DIV/0!	#DIV/0!	#DIV/0!
	#DIV/0!	#DIV/0!	#DIV/0!
	#DIV/0!	#DIV/0!	#DIV/0!
	#DIV/0!	#DIV/0!	#DIV/0!
	#DIV/0!	#DIV/0!	#DIV/0!
	#DIV/0!	#DIV/0!	#DIV/0!
	#DIV/0!	#DIV/0!	#DIV/0!
	#DIV/0!	#DIV/0!	#DIV/0!
	#DIV/0!	#DIV/0!	#DIV/0!
	#DIV/0!	#DIV/0!	#DIV/0!
	#DIV/0!	#DIV/0!	#DIV/0!
	#DIV/0!	#DIV/0!	#DIV/0!
	#DIV/0!	#DIV/0!	#DIV/0!
	#DIV/0!	#DIV/0!	#DIV/0!
	#DIV/0!	#DIV/0!	#DIV/0!
	#DIV/0!	#DIV/0!	#DIV/0!
	#DIV/0!	#DIV/0!	#DIV/0!
	#DIV/0!	#DIV/0!	#DIV/0!
	#DIV/0!	#DIV/0!	#DIV/0!
	#DIV/0!	#DIV/0!	#DIV/0!
	#DIV/0!	#DIV/0!	#DIV/0!
	#DIV/0!	#DIV/0!	#DIV/0!
	#DIV/0!	#DIV/0!	#DIV/0!
	#DIV/0!	#DIV/0!	#DIV/0!
	#DIV/0!	#DIV/0!	#DIV/0!
	#DIV/0!	#DIV/0!	#DIV/0!
	#DIV/0!	#DIV/0!	#DIV/0!
	#DIV/0!	#DIV/0!	#DIV/0!
	#DIV/0!	#DIV/0!	#DIV/0!
	#DIV/0!	#DIV/0!	#DIV/0!

## Sheet: Figure 2C
Empty Liposomes with NBD-PS				SERINC3 Liposomes (0.25) with NBD-PS				SERINC3 Liposomes (0.50) with NBD-PS				SERINC3 Liposomes (1.0) with NBD-PS				SERINC3 Liposomes (1.5) with NBD-PS
Time (s)	exp-1	exp-2		Time (s)	exp-1	exp-2		Time (s)	exp-1	exp-2		Time (s)	exp-1	exp-2		Time (s)	exp-1	exp-2
0	1.01122	1.01809		0	1.00491			0	1.00595	1.01241		0	1.00528	1.00578		0	1.00539	1.0087
1	1.00841	1.01605		1	1.00694			1	1.0021	0.996329		1	1.00593	1.01815		1	1.00445	1.0049
2	1.00627	1.01374		2	1.00534			2	1.00397	0.989313		2	1.00455	1.00418		2	1.00898	1.00734
3	1.00835	1.01564		3	1.0033			3	1.00052	0.995379		3	1.00464	1.0036		3	1.0011	1.01283
4	1.01075	1.01643		4	1.0036			4	1.00422	1.00396		4	1.00707	1.00632		4	1.00312	1.01348
5	1.00459	1.01389		5	1.00353			5	1.00222	0.996469		5	1.00396	1.00285		5	1.00182	1.01235
6	1.00841	1.01355		6	1.00465			6	0.999968	0.98337		6	1.00534	1.00355		6	1.00307	1.0058
7	1.00808	1.01438		7	1.00457			7	1.00186	0.986502		7	1.00494	1.00605		7	1.00086	1.00684
8	1.00436	1.01938		8	1.0012			8	1.00052	1.00093		8	1.00532	1.00262		8	1.00595	1.00588
9	1.00357	1.01317		9	1.00524			9	1.00305	1.00579		9	1.00523	1.00268		9	1.00473	1.00304
10	1.00483	1.01651		10	1.00306			10	0.998969	1.00189		10	1.00708	1.01105		10	1.00474	1.00498
11	0.999473	1.0105		11	1.00779			11	1.00512	0.993198		11	1.00562	1.00758		11	1.0029	1.00342
12	1.01166	1.01155		12	1.0078			12	0.996165	0.987657		12	1.00203	1.00303		12	1.00107	1.00414
13	1.00692	1.01386		13	1.00151			13	1.00264	0.991873		13	1.00334	1.00424		13	1.00342	1.00653
14	1.00552	1.01059		14	1.0023			14	0.99893	0.988904		14	1.00302	1.00302		14	1.00258	1.00584
15	1.0047	1.01178		15	1.0018			15	0.999074	0.990459		15	1.00336	1.00646		15	1.00464	1.00472
16	1.00441	1.01143		16	1.00433			16	0.999752	0.988712		16	1.00449	1.00676		16	1.00721	1.00428
17	1.00787	1.01022		17	1.00913			17	1.00349	0.988097		17	1.00448	1.00466		17	1.00119	1.00726
18	1.00316	1.00949		18	0.999228			18	0.998573	0.986881		18	1.00506	1.00329		18	1.00454	1.01309
19	0.998136	1.01024		19	1.004			19	1.00165	1.01509		19	1.00498	1.00283		19	1.0023	1.00475
20	0.996554	1.01092		20	1.00938			20	0.998143	1.00525		20	1.00363	1.00157		20	1.00216	1.00472
21	0.994145	1.00982		21	1.00208			21	1.00209	0.999576		21	1.00401	1.00083		21	1.00264	1.00192
22	0.996433	1.00913		22	1.00543			22	1.00106	0.995819		22	1.00347	1.00298		22	1.00499	1.00285
23	0.998576	1.00691		23	1.00627			23	1.00128	0.995867		23	1.00298	1.00489		23	0.999211	1.00408
24	1.00131	1.00917		24	1.01042			24	1.00009	1.00804		24	1.00513	1.00942		24	0.999999	1.00496
25	1.0023	1.00992		25	1.00554			25	0.998286	1.00064		25	1.00113	1.00242		25	1.00013	1.00768
26	1.00126	1.00673		26	1.00184			26	1.00025	0.986508		26	1.00237	1.00369		26	1.00669	1.00431
27	0.998737	1.0072		27	1.00233			27	1.00098	0.992835		27	1.00307	1.00186		27	0.998712	1.00103
28	0.994828	1.01046		28	1.00197			28	1.00299	0.995628		28	1.00578	1.00293		28	1.00389	1.00707
29	0.994293	1.00881		29	1.00371			29	1.00103	0.999719		29	1.00225	1.00346		29	1.00365	1.00763
30	0.996189	1.00852		30	1.00437			30	0.99875	1.00209		30	1.00355	1.00147		30	1.00463	1.00256
31	0.992604	1.00801		31	1.00155			31	1.00037	1.00045		31	1.00392	1.00358		31	1.00199	1.00514
32	0.993007	1.01163		32	0.999912			32	0.999568	0.990799		32	1.00396	1.00168		32	1.00447	1.00303
33	0.993094	1.00688		33	1.00008			33	0.998004	0.987978		33	1.00249	1.00583		33	1.00336	1.00147
34	0.991622	1.00654		34	1.00426			34	1.00339	0.993746		34	1.00424	1.00001		34	0.999892	1.00721
35	0.993083	1.00463		35	0.999686			35	0.999348	0.994368		35	1.00228	1.00351		35	1.00425	1.00546
36	0.992246	1.00645		36	1.00133			36	1.00028	1.00426		36	1.00291	1.0044		36	0.999546	1.0029
37	0.996924	1.00475		37	1.00474			37	1.0015	1.00707		37	1.00271	1.00841		37	1.00229	1.0118
38	0.993408	1.007		38	1.00544			38	0.998943	1.00086		38	1.00222	1.00118		38	1.00314	1.00567
39	0.997172	1.00575		39	1.00679			39	0.999678	1.00196		39	1.003	0.998359		39	0.99887	1.00115
40	0.997379	1.00736		40	1.00134			40	1.00043	0.987375		40	1.00335	1.00151		40	1.00249	1.0039
41	1.00373	1.00569		41	1.00407			41	0.998419	1.02179		41	1.00057	1.00603		41	1.00013	1.00509
42	1.00631	1.00197		42	1.00696			42	1.00374	1.0129		42	1.00155	0.999895		42	0.999353	1.00007
43	1.00265	1.00494		43	1.0055			43	0.997393	0.984517		43	1.00332	0.99852		43	1.00133	1.00363
44	1.00343	1.00588		44	1.00273			44	0.99837	0.996248		44	1.00182	1.00029		44	1.00018	1.00333
45	0.998835	1.00312		45	1.0042			45	0.997955	0.980567		45	1.00248	1.00338		45	1.00254	1.00134
46	0.993156	1.00313		46	1.00336			46	0.995866	0.994329		46	1.0021	1.00095		46	1.00248	1.00186
47	0.993586	1.00636		47	1.00077			47	1.00413	0.999866		47	1.00253	1.00001		47	0.998047	1.00427
48	0.993621	1.00422		48	1.00285			48	0.998695	1.00755		48	1.00281	1.00391		48	1.00126	0.999865
49	0.997267	1.00584		49	1.00182			49	0.999948	0.99222		49	1.00194	1.00111		49	0.99997	1.00091
50	0.993732	1.00335		50	1.00155			50	1.01013	0.986208		50	1.00481	0.99963		50	1.00274	1.00276
51	0.992413	1.00717		51	1.00635			51	0.99964	1.00379		51	1.00538	1.00144		51	1.00121	1.00228
52	0.994155	1.00556		52	1.00323			52	0.999358	1.00302		52	1.00387	1.00574		52	1.0037	0.997824
53	0.992943	1.00589		53	1.00349			53	1.00107	1.00147		53	1.00229	1.00099		53	1.00053	1.00127
54	0.992761	1.00157		54	1.00545			54	0.998718	0.991915		54	0.99866	1.00013		54	1.00407	1.00265
55	0.993057	1.00327		55	1.00377			55	0.998224	0.996		55	1.00395	1.0021		55	1.00009	0.996894
56	0.999677	1.00303		56	1.00665			56	0.99856	0.997981		56	1.00026	1.00268		56	1.00507	0.998468
57	1.00763	1.00428		57	1.00184			57	1.00026	0.990089		57	1.0043	1.00641		57	1.00118	1.00238
58	1.00046	1.00024		58	1.00281			58	0.99988	0.997027		58	1.00264	1.00272		58	0.995234	0.997663
59	1.00729	1.00088		59	0.997903			59	1.00121	0.991616		59	1.00233	1.00558		59	0.997575	1.00316
60	1.00088	1.00205		60	0.999268			60	1.00041	0.981499		60	1.00293	1.00197		60	1.00111	1.00592
61	1.00062	1.00052		61	1.00332			61	0.99675	0.994031		61	1.00224	1.00296		61	1.00364	1.00086
62	1.0037	1.00175		62	1.00535			62	0.995649	0.985062		62	1.00287	1.00044		62	0.999323	0.998487
63	1.00178	1.0048		63	1.00309			63	1.00209	0.997591		63	1.00271	1.00071		63	1.00089	1.00106
64	0.998735	1.00084		64	1.00587			64	1.00139	0.998651		64	1.00411	1.00056		64	1.00048	0.999839
65	0.998093	1.00181		65	1.0023			65	1.00064	0.991358		65	1.00214	1.0009		65	1.00458	0.997484
66	0.998803	1.00564		66	1.00984			66	0.99659	0.995276		66	1.00212	1.00168		66	0.997756	1.0015
67	1.00345	1.00079		67	1.00676			67	0.999737	0.986675		67	0.999674	1.0031		67	0.997111	1.00669
68	0.999178	1.0046		68	1.0055			68	1.00433	0.988189		68	1.00122	1.0013		68	0.999782	1.00591
69	1.00168	0.999192		69	1.00013			69	0.998637	1.00942		69	1.00134	1.00202		69	1.00314	1.00627
70	1.00204	1.00275		70	0.999928			70	0.995997	0.989515		70	1.0024	0.99787		70	0.998109	1.00239
71	0.996425	0.998185		71	0.999846			71	0.995805	1.00017		71	0.999325	1.0007		71	1.00144	0.999159
72	1.00227	0.998221		72	1.00059			72	0.997412	0.990262		72	0.998307	1.00406		72	0.997734	1.0007
73	0.998971	0.998752		73	1.00499			73	0.996522	0.990206		73	0.999566	1.0001		73	0.999946	0.997938
74	0.998002	0.99889		74	1.00002			74	1.00076	1.01761		74	1.00231	0.999839		74	0.998937	1.00627
75	0.998728	1.00271		75	1.00052			75	1.00085	0.999828		75	1.00067	1.00015		75	0.999785	1.00359
76	0.999431	1.00099		76	1.00706			76	0.999543	0.985573		76	1.00007	1.00169		76	0.998804	0.998456
77	0.997387	0.999509		77	1.00345			77	0.995752	0.983043		77	0.999854	0.996986		77	0.998294	0.99951
78	0.999157	1.00137		78	1.00409			78	1.00202	0.986755		78	1.00062	1.00282		78	1.00529	1.00336
79	1.00286	0.996602		79	1.00194			79	1.00228	0.996478		79	1.00251	1.00366		79	1.00086	0.997201
80	0.99927	1.00047		80	1.00238			80	0.996896	0.988853		80	0.999881	1.00002		80	0.996882	1.00218
81	1.00222	1.00025		81	0.998506			81	1.00015	0.999752		81	1.00213	1.00166		81	0.998963	0.998919
82	1.00199	0.998747		82	0.99903			82	0.999702	1.00574		82	0.999861	0.99792		82	1.00388	1.00362
83	0.995729	0.99622		83	0.999948			83	0.997924	1.01622		83	0.999217	1.00022		83	1.00224	0.995696
84	1.00013	0.99722		84	1.00152			84	1.00242	1.00059		84	0.998899	1.00058		84	0.995902	0.999978
85	1.00067	1.00709		85	0.99862			85	1.0029	0.988842		85	1.00001	0.999586		85	1.00214	0.999605
86	0.996798	1.00123		86	1.00197			86	0.995699	0.986359		86	1.00157	0.999346		86	1.00332	1.00071
87	1.00263	0.99797		87	0.998891			87	1.00178	0.994881		87	1.0027	1.00128		87	0.997316	1.00706
88	0.997016	0.999522		88	1.00613			88	0.995552	1.01409		88	1.00101	1.00145		88	0.999318	1.00451
89	0.998859	0.996666		89	1.00499			89	0.99929	0.987718		89	1.00165	1.00345		89	0.998555	1.00123
90	0.995394	1.0007		90	1.00112			90	1.00242	1.00134		90	1.00097	1.00279		90	1.00016	1.00336
91	0.997559	0.995301		91	1.0026			91	1.00204	0.994589		91	0.999824	0.999312		91	1.00274	1.0009
92	1.00096	0.997772		92	1.00468			92	0.995209	0.998148		92	1.00003	1.00128		92	1.00014	0.997943
93	1.00293	0.997242		93	0.996111			93	0.997895	0.988507		93	1.00069	0.999134		93	0.995704	0.999685
94	0.998429	0.997208		94	1.00108			94	1.00267	0.988036		94	1.00009	0.996654		94	0.999968	1.00129
95	1.02205	0.999106		95	1.01521			95	0.997691	0.996735		95	1.01009	0.998898		95	1.00035	1.00003
96	1.05514	1.02079		96	1.04139			96	0.99728	1.05293		96	1.03482	1.0065		96	1.00866	1.02899
97	1.06196	1.05791		97	1.10968			97	1.01023	0.986626		97	1.0853	1.02926		97	1.02798	1.07017
98	0.960027	0.970884		98	1.01263			98	1.06461	0.8744		98	1.0047	1.05375		98	1.0328	1.00862
99	0.906889	0.865014		99	0.931318			99	1.06106	0.776791		99	0.918748	0.934925		99	0.944268	0.904747
100	0.878555	0.810497		100	0.882206			100	0.9712	0.745919		100	0.874693	0.843276		100	0.857162	0.799352
101	0.860313	0.781377		101	0.858094			101	0.927809	0.721328		101	0.842103	0.770809		101	0.817639	0.747714
102	0.847093	0.761558		102	0.840736			102	0.898236	0.699253		102	0.816602	0.740512		102	0.784169	0.712445
103	0.831849	0.74333		103	0.819607			103	0.879294	0.682723		103	0.795062	0.718214		103	0.759813	0.684256
104	0.8153	0.727515		104	0.799751			104	0.85871	0.664784		104	0.765979	0.695776		104	0.726756	0.65892
105	0.798451	0.715506		105	0.784829			105	0.838386	0.650285		105	0.747782	0.676877		105	0.70701	0.63571
106	0.789887	0.701245		106	0.769675			106	0.821321	0.635309		106	0.727254	0.651689		106	0.682757	0.611316
107	0.778123	0.692906		107	0.752193			107	0.799361	0.619778		107	0.704539	0.631953		107	0.656442	0.592795
108	0.765208	0.679415		108	0.742127			108	0.782286	0.608726		108	0.687069	0.613566		108	0.636138	0.571131
109	0.752771	0.670042		109	0.727173			109	0.768541	0.593896		109	0.668576	0.598907		109	0.611595	0.557133
110	0.748606	0.661535		110	0.716085			110	0.750858	0.583207		110	0.650754	0.582793		110	0.592075	0.536433
111	0.74134	0.652442		111	0.703252			111	0.735787	0.572383		111	0.635331	0.565583		111	0.568246	0.519759
112	0.725448	0.644617		112	0.691765			112	0.723073	0.560191		112	0.618385	0.552217		112	0.54854	0.50553
113	0.720615	0.636854		113	0.676599			113	0.703921	0.551803		113	0.603967	0.540515		113	0.533223	0.490791
114	0.707412	0.628034		114	0.670285			114	0.691732	0.543745		114	0.588388	0.524543		114	0.517378	0.478254
115	0.697486	0.623665		115	0.660732			115	0.679247	0.532115		115	0.573768	0.511865		115	0.496685	0.473818
116	0.690473	0.617508		116	0.651616			116	0.66643	0.526572		116	0.559046	0.502265		116	0.478519	0.451224
117	0.683811	0.609084		117	0.643101			117	0.65472	0.518047		117	0.547712	0.490638		117	0.4644	0.442168
118	0.679383	0.604244		118	0.636649			118	0.643507	0.508908		118	0.532832	0.479308		118	0.45004	0.430205
119	0.676885	0.597468		119	0.62726			119	0.633965	0.502957		119	0.524197	0.469607		119	0.434007	0.418488
120	0.666343	0.594743		120	0.617568			120	0.624162	0.49571		120	0.51152	0.460036		120	0.423432	0.409866
121	0.662239	0.588316		121	0.609623			121	0.614395	0.490277		121	0.499197	0.45304		121	0.409342	0.401937
122	0.658771	0.582614		122	0.606007			122	0.602318	0.482943		122	0.488143	0.443277		122	0.399503	0.391428
123	0.655758	0.581094		123	0.598269			123	0.597296	0.476258		123	0.477441	0.431		123	0.38168	0.38159
124	0.649946	0.576505		124	0.591702			124	0.58409	0.474191		124	0.472477	0.424896		124	0.375094	0.375292
125	0.646027	0.572472		125	0.586338			125	0.577185	0.46514		125	0.458444	0.417167		125	0.363752	0.36777
126	0.643757	0.568578		126	0.579434			126	0.570948	0.461452		126	0.44988	0.410071		126	0.351237	0.358335
127	0.638998	0.56582		127	0.574727			127	0.561764	0.456609		127	0.44208	0.403584		127	0.342312	0.35318
128	0.637505	0.562699		128	0.570484			128	0.552251	0.452679		128	0.431547	0.396511		128	0.334066	0.348009
129	0.638504	0.559938		129	0.563884			129	0.542804	0.446958		129	0.426131	0.389112		129	0.322357	0.3422
130	0.637465	0.55671		130	0.556678			130	0.539762	0.443839		130	0.415197	0.384919		130	0.314109	0.335855
131	0.632928	0.555968		131	0.559186			131	0.530823	0.437022		131	0.410215	0.378742		131	0.306323	0.329469
132	0.629878	0.551511		132	0.548661			132	0.522325	0.434801		132	0.402546	0.372596		132	0.29684	0.323801
133	0.628439	0.550802		133	0.545173			133	0.517353	0.430702		133	0.395004	0.369978		133	0.28797	0.317753
134	0.625542	0.546772		134	0.540511			134	0.515402	0.427099		134	0.39	0.363665		134	0.28393	0.312913
135	0.621214	0.545717		135	0.538466			135	0.508163	0.423685		135	0.381285	0.358438		135	0.277433	0.309893
136	0.620068	0.542988		136	0.530241			136	0.500412	0.420879		136	0.37548	0.354687		136	0.270359	0.306473
137	0.621426	0.540642		137	0.529397			137	0.496008	0.418802		137	0.371991	0.350836		137	0.260953	0.300283
138	0.613494	0.537579		138	0.525865			138	0.488851	0.415507		138	0.365497	0.345273		138	0.252976	0.297912
139	0.613782	0.536439		139	0.524159			139	0.484199	0.412205		139	0.361837	0.342795		139	0.247423	0.293376
140	0.608982	0.535732		140	0.517938			140	0.481556	0.409712		140	0.353282	0.338053		140	0.24213	0.288007
141	0.609734	0.533613		141	0.516669			141	0.477925	0.405683		141	0.348274	0.33393		141	0.236572	0.28609
142	0.608158	0.531171		142	0.513598			142	0.47091	0.403129		142	0.343178	0.330532		142	0.2338	0.283082
143	0.603277	0.531699		143	0.508247			143	0.466007	0.401297		143	0.338814	0.328256		143	0.228422	0.279648
144	0.603215	0.531088		144	0.51165			144	0.461538	0.400438		144	0.333029	0.323707		144	0.225968	0.276395
145	0.59921	0.526601		145	0.507019			145	0.45814	0.395719		145	0.331323	0.320889		145	0.220649	0.272764
146	0.599601	0.526252		146	0.500267			146	0.452418	0.393463		146	0.327553	0.319707		146	0.218362	0.270934
147	0.595726	0.525222		147	0.499353			147	0.449883	0.391749		147	0.320082	0.315921		147	0.213213	0.267734
148	0.595774	0.524569		148	0.497597			148	0.447741	0.391946		148	0.316997	0.313253		148	0.20853	0.264541
149	0.595765	0.521436		149	0.496153			149	0.444412	0.38878		149	0.313308	0.311752		149	0.205548	0.2622
150	0.597998	0.521975		150	0.493027			150	0.441291	0.386227		150	0.311547	0.308371		150	0.202683	0.259904
151	0.598828	0.521241		151	0.489041			151	0.433665	0.38638		151	0.306339	0.306145		151	0.198893	0.257705
152	0.591251	0.518061		152	0.486055			152	0.43196	0.383598		152	0.30469	0.303126		152	0.196073	0.254838
153	0.59192	0.520352		153	0.487702			153	0.429257	0.381138		153	0.300706	0.3005		153	0.190995	0.253
154	0.588207	0.515964		154	0.482258			154	0.42631	0.378957		154	0.298146	0.299221		154	0.18819	0.250128
155	0.591299	0.516464		155	0.480731			155	0.42451	0.377217		155	0.294398	0.297749		155	0.186125	0.24871
156	0.593241	0.515488		156	0.480799			156	0.422321	0.375664		156	0.291715	0.29593		156	0.180552	0.247164
157	0.590923	0.51236		157	0.478112			157	0.420077	0.375107		157	0.289158	0.291934		157	0.178019	0.245491
158	0.59027	0.514026		158	0.47876			158	0.415568	0.37277		158	0.287048	0.291336		158	0.176437	0.242371
159	0.588358	0.514157		159	0.475984			159	0.413105	0.371548		159	0.283259	0.287963		159	0.176041	0.242069
160	0.585747	0.513971		160	0.472611			160	0.409305	0.371082		160	0.280454	0.286667		160	0.172844	0.24029
161	0.584917	0.510867		161	0.472938			161	0.406855	0.370499		161	0.277598	0.284455		161	0.169914	0.238306
162	0.58081	0.509474		162	0.471262			162	0.406764	0.368622		162	0.275783	0.283057		162	0.165919	0.236775
163	0.586149	0.507528		163	0.464847			163	0.403035	0.366202		163	0.274326	0.280955		163	0.165742	0.234998
164	0.585861	0.507499		164	0.466217			164	0.400669	0.363509		164	0.272724	0.279812		164	0.164515	0.233898
165	0.58249	0.507552		165	0.466204			165	0.39972	0.364457		165	0.268441	0.278185		165	0.161393	0.231282
166	0.578418	0.508066		166	0.465239			166	0.397455	0.36262		166	0.266429	0.275046		166	0.156367	0.230186
167	0.582511	0.508552		167	0.46105			167	0.396108	0.359821		167	0.26431	0.276675		167	0.155557	0.229953
168	0.581465	0.506834		168	0.462437			168	0.393844	0.360998		168	0.262819	0.273548		168	0.155476	0.228176
169	0.584863	0.505419		169	0.460939			169	0.388591	0.359721		169	0.259625	0.27158		169	0.153542	0.225777
170	0.574227	0.504097		170	0.456763			170	0.388033	0.358617		170	0.259639	0.270341		170	0.151749	0.225285
171	0.577476	0.503254		171	0.459279			171	0.386279	0.356513		171	0.255764	0.268994		171	0.150908	0.22363
172	0.578224	0.503656		172	0.455878			172	0.385586	0.353914		172	0.255426	0.268515		172	0.149151	0.222584
173	0.580405	0.503002		173	0.454905			173	0.38195	0.355483		173	0.254978	0.266734		173	0.147749	0.220723
174	0.575285	0.503479		174	0.453097			174	0.381234	0.354049		174	0.252676	0.26508		174	0.147533	0.219281
175	0.580317	0.50064		175	0.451313			175	0.380567	0.351771		175	0.251403	0.264616		175	0.144387	0.21878
176	0.577174	0.500212		176	0.452762			176	0.378139	0.351323		176	0.248971	0.262198		176	0.142783	0.218055
177	0.574011	0.499757		177	0.44966			177	0.376545	0.348623		177	0.247367	0.260912		177	0.143503	0.2161
178	0.575282	0.497977		178	0.449995			178	0.374474	0.348252		178	0.244942	0.260393		178	0.140576	0.215229
179	0.571454	0.498971		179	0.44903			179	0.373248	0.349448		179	0.244059	0.259331		179	0.138756	0.215126
180	0.573057	0.497325		180	0.448313			180	0.371479	0.34794		180	0.242428	0.259831		180	0.138752	0.213197
181	0.57718	0.498048		181	0.447431			181	0.368895	0.345383		181	0.239643	0.256572		181	0.139202	0.21272
182	0.571008	0.495958		182	0.444083			182	0.366657	0.346281		182	0.238694	0.256026		182	0.136362	0.211633
183	0.574937	0.498444		183	0.444547			183	0.366422	0.345425		183	0.238102	0.253967		183	0.135791	0.209697
184	0.573097	0.496336		184	0.44135			184	0.364524	0.344113		184	0.235947	0.254204		184	0.135281	0.209322
185	0.572993	0.496344		185	0.44115			185	0.364133	0.342894		185	0.235458	0.253473		185	0.133214	0.208932
186	0.574913	0.495142		186	0.441014			186	0.362602	0.343832		186	0.233247	0.25211		186	0.132774	0.206458
187	0.567265	0.495759		187	0.441928			187	0.360837	0.33995		187	0.2324	0.251822		187	0.133092	0.206744
188	0.571158	0.494705		188	0.440254			188	0.359495	0.341375		188	0.231163	0.249742		188	0.131652	0.205541
189	0.566166	0.494162		189	0.438759			189	0.357218	0.340908		189	0.231245	0.249606		189	0.131139	0.204087
190	0.570602	0.494099		190	0.438055			190	0.357289	0.338841		190	0.230355	0.248096		190	0.129933	0.203451
191	0.571556	0.493154		191	0.434919			191	0.356291	0.338977		191	0.227624	0.247149		191	0.128817	0.203362
192	0.566436	0.492268		192	0.434797			192	0.35465	0.338045		192	0.226995	0.246689		192	0.12769	0.201405
193	0.570027	0.493501		193	0.435999			193	0.353136	0.336606		193	0.227838	0.245344		193	0.127057	0.201374
194	0.57113	0.493321		194	0.433449			194	0.350722	0.33548		194	0.226577	0.24358		194	0.125458	0.200278
195	0.572476	0.489825		195	0.432506			195	0.352918	0.335056		195	0.223616	0.243413		195	0.125779	0.198718
196	0.570188	0.489262		196	0.432011			196	0.349168	0.333746		196	0.223846	0.242807		196	0.125121	0.198204
197	0.565972	0.490153		197	0.42988			197	0.347521	0.334471		197	0.222677	0.240601		197	0.125237	0.197994
198	0.568091	0.490784		198	0.431547			198	0.34727	0.332053		198	0.221829	0.240477		198	0.122888	0.198279
199	0.566906	0.489035		199	0.432436			199	0.345734	0.33237		199	0.220054	0.23873		199	0.12191	0.19652
200	0.564588	0.490967		200	0.429353			200	0.345922	0.330043		200	0.219572	0.239303		200	0.121375	0.196115
201	0.56328	0.488753		201	0.426864			201	0.345863	0.330702		201	0.21885	0.236994		201	0.120845	0.19509
202	0.568582	0.488007		202	0.428693			202	0.344569	0.328707		202	0.216735	0.23758		202	0.121024	0.194016
203	0.56436	0.487587		203	0.427929			203	0.342273	0.329843		203	0.215586	0.236355		203	0.120499	0.193345
204	0.565747	0.488048		204	0.42669			204	0.343783	0.329975		204	0.216159	0.235882		204	0.119835	0.193144
205	0.565843	0.486362		205	0.426756			205	0.340075	0.327949		205	0.214704	0.233627		205	0.119524	0.193634
206	0.564665	0.486263		206	0.426085			206	0.340933	0.327644		206	0.213881	0.234046		206	0.11967	0.19073
207	0.562327	0.485089		207	0.423818			207	0.337266	0.326288		207	0.213579	0.233955		207	0.119087	0.190462
208	0.563705	0.484566		208	0.422468			208	0.336638	0.328349		208	0.212442	0.233373		208	0.116839	0.189794
209	0.561659	0.486096		209	0.424227			209	0.336832	0.325824		209	0.211262	0.231933		209	0.117245	0.189145
210	0.563096	0.485336		210	0.423675			210	0.335953	0.324629		210	0.211391	0.230984		210	0.118099	0.189274
211	0.564317	0.485248		211	0.423228			211	0.333377	0.324835		211	0.21082	0.230317		211	0.116887	0.187988
212	0.558556	0.484428		212	0.422324			212	0.333286	0.322765		212	0.209438	0.230023		212	0.115601	0.188525
213	0.561679	0.484869		213	0.420038			213	0.332662	0.322499		213	0.209031	0.228906		213	0.11476	0.186356
214	0.560766	0.480933		214	0.419156			214	0.330304	0.322043		214	0.206897	0.22766		214	0.115712	0.186569
215	0.560147	0.482516		215	0.416732			215	0.332908	0.32225		215	0.206021	0.228669		215	0.114057	0.185137
216	0.56034	0.48225		216	0.417371			216	0.331489	0.322465		216	0.206096	0.226667		216	0.113207	0.18536
217	0.558381	0.482459		217	0.41663			217	0.328505	0.320136		217	0.205289	0.226749		217	0.113672	0.184862
218	0.560314	0.482063		218	0.41457			218	0.327197	0.319633		218	0.204236	0.226037		218	0.113487	0.183851
219	0.556568	0.481704		219	0.415954			219	0.328242	0.319428		219	0.203469	0.224835		219	0.112688	0.183014
220	0.559263	0.481215		220	0.416042			220	0.326269	0.318929		220	0.202715	0.225317		220	0.111949	0.182789
221	0.559056	0.479456		221	0.413121			221	0.324467	0.317587		221	0.20182	0.223892		221	0.110837	0.18306
222	0.561526	0.479453		222	0.412847			222	0.323282	0.317471		222	0.201905	0.222762		222	0.111214	0.181233
223	0.558715	0.481168		223	0.411962			223	0.322932	0.318069		223	0.20141	0.222844		223	0.110559	0.181625
224	0.561013	0.479885		224	0.412152			224	0.322883	0.315179		224	0.200815	0.221434		224	0.109471	0.180904
225	0.55663	0.480029		225	0.413263			225	0.321403	0.316558		225	0.200175	0.221056		225	0.110116	0.18143
226	0.555149	0.479748		226	0.414173			226	0.321522	0.316035		226	0.198879	0.220932		226	0.108932	0.178664
227	0.561861	0.479863		227	0.410811			227	0.320564	0.316326		227	0.198482	0.220464		227	0.10875	0.178873
228	0.559034	0.478597		228	0.411528			228	0.319956	0.313766		228	0.197154	0.219411		228	0.107866	0.177803
229	0.556859	0.47809		229	0.410169			229	0.320652	0.314197		229	0.197342	0.219962		229	0.108695	0.17841
230	0.557442	0.480361		230	0.409602			230	0.319222	0.312669		230	0.197219	0.21866		230	0.107986	0.177231
231	0.559287	0.477504		231	0.408983			231	0.318136	0.313213		231	0.196189	0.217584		231	0.106903	0.176741
232	0.559424	0.47522		232	0.40769			232	0.317345	0.31187		232	0.195309	0.217539		232	0.106522	0.176687
233	0.555037	0.475846		233	0.407202			233	0.316351	0.311213		233	0.194545	0.217188		233	0.106528	0.175725
234	0.556039	0.476395		234	0.405631			234	0.316104	0.311245		234	0.195574	0.217306		234	0.106929	0.174689
235	0.557652	0.477571		235	0.407565			235	0.314753	0.310951		235	0.193851	0.216506		235	0.10587	0.175166
236	0.556345	0.477659		236	0.406951			236	0.315305	0.310624		236	0.19397	0.215852		236	0.106369	0.175034
237	0.554009	0.476341		237	0.404868			237	0.31316	0.308695		237	0.192494	0.214448		237	0.10529	0.173895
238	0.556189	0.474725		238	0.403507			238	0.312326	0.308446		238	0.191896	0.213414		238	0.105426	0.173016
239	0.55669	0.474078		239	0.402785			239	0.313847	0.308962		239	0.191911	0.213295		239	0.104393	0.172393
240	0.552763	0.472476		240	0.404563			240	0.311106	0.308487		240	0.190483	0.213614		240	0.104167	0.172645
241	0.554308	0.475387		241	0.403378			241	0.310591	0.306641		241	0.191056	0.213257		241	0.104215	0.171803
242	0.557904	0.473487		242	0.402213			242	0.311105	0.306677		242	0.190481	0.212328		242	0.104308	0.171257
243	0.554905	0.472655		243	0.399875			243	0.309562	0.307268		243	0.190304	0.211502		243	0.103325	0.17181
244	0.555763	0.475959		244	0.404871			244	0.307838	0.30617		244	0.189899	0.210591		244	0.103561	0.170789
245	0.553601	0.476708		245	0.402541			245	0.307427	0.305542		245	0.189819	0.211204		245	0.102863	0.170064
246	0.55418	0.471958		246	0.399602			246	0.306727	0.304674		246	0.188271	0.209789		246	0.102206	0.16989
247	0.554032	0.470512		247	0.398576			247	0.306367	0.303854		247	0.188469	0.209715		247	0.102225	0.169943
248	0.550688	0.472222		248	0.399346			248	0.305234	0.305471		248	0.186721	0.209533		248	0.102753	0.168812
249	0.551032	0.471434		249	0.399568			249	0.306279	0.303689		249	0.186368	0.209075		249	0.103029	0.168445
250	0.55131	0.472791		250	0.400631			250	0.306064	0.304112		250	0.186571	0.207672		250	0.101479	0.168506
251	0.551879	0.472992		251	0.398389			251	0.303138	0.303565		251	0.186366	0.207461		251	0.100968	0.167557
252	0.552956	0.471857		252	0.40034			252	0.302474	0.304377		252	0.186006	0.207637		252	0.100248	0.166948
253	0.551611	0.471937		253	0.395603			253	0.302742	0.302249		253	0.185622	0.20724		253	0.10109	0.166657
254	0.551342	0.471536		254	0.396148			254	0.3027	0.301449		254	0.184727	0.207062		254	0.101076	0.168016
255	0.548518	0.473055		255	0.39494			255	0.30218	0.300496		255	0.183564	0.206162		255	0.101038	0.16538
256	0.550502	0.469389		256	0.395671			256	0.303261	0.301893		256	0.183585	0.205357		256	0.099821	0.166117
257	0.550341	0.471656		257	0.394391			257	0.302446	0.301495		257	0.183392	0.204806		257	0.0992254	0.16522
258	0.549592	0.469717		258	0.395792			258	0.302778	0.299628		258	0.182872	0.204597		258	0.0992226	0.164801
259	0.547746	0.469406		259	0.393585			259	0.301863	0.300907		259	0.182015	0.20389		259	0.0979347	0.164484
260	0.547097	0.47086		260	0.39375			260	0.299718	0.300295		260	0.181954	0.203808		260	0.0991946	0.164945
261	0.552232	0.469653		261	0.393374			261	0.299748	0.299008		261	0.18249	0.203654		261	0.0976421	0.163844
262	0.551055	0.468598		262	0.391608			262	0.298038	0.298369		262	0.180775	0.203774		262	0.0986273	0.163005
263	0.551019	0.470514		263	0.3919			263	0.299712	0.298563		263	0.18035	0.202705		263	0.0976719	0.163415
264	0.549725	0.469256		264	0.393012			264	0.300276	0.29741		264	0.180571	0.201654		264	0.0980529	0.162861
265	0.5527	0.468189		265	0.391376			265	0.299027	0.297733		265	0.18057	0.201166		265	0.0972482	0.162795
266	0.553216	0.46829		266	0.391615			266	0.296781	0.297902		266	0.180605	0.201661		266	0.0981387	0.162474
267	0.546951	0.468084		267	0.390586			267	0.296904	0.296611		267	0.179642	0.200864		267	0.0961912	0.16118
268	0.550269	0.467731		268	0.389361			268	0.298135	0.29579		268	0.177675	0.200167		268	0.0966759	0.16149
269	0.549116	0.467405		269	0.389643			269	0.296022	0.295414		269	0.178216	0.200422		269	0.0967806	0.160174
270	0.549254	0.466253		270	0.38723			270	0.297068	0.29544		270	0.177336	0.198958		270	0.0970992	0.160348
271	0.551858	0.466817		271	0.389867			271	0.296322	0.295292		271	0.17711	0.199516		271	0.0957551	0.159369
272	0.547111	0.467462		272	0.38922			272	0.295427	0.294013		272	0.176447	0.198774		272	0.0960871	0.159723
273	0.548713	0.466483		273	0.388282			273	0.294156	0.294824		273	0.176273	0.198727		273	0.0962587	0.158007
274	0.546383	0.465577		274	0.38766			274	0.295308	0.292201		274	0.176527	0.1979		274	0.0954937	0.158748
275	0.54962	0.46822		275	0.388799			275	0.292565	0.292467		275	0.176112	0.196776		275	0.0945687	0.158306
276	0.547474	0.465772		276	0.387469			276	0.292101	0.292396		276	0.175334	0.197274		276	0.0951274	0.157691
277	0.547752	0.464449		277	0.386923			277	0.292669	0.29231		277	0.174671	0.197141		277	0.0946235	0.158047
278	0.546635	0.464256		278	0.386879			278	0.290283	0.292602		278	0.174302	0.196332		278	0.0943993	0.157648
279	0.541033	0.465917		279	0.383174			279	0.290818	0.291624		279	0.17469	0.196341		279	0.0948873	0.158005
280	0.544801	0.463077		280	0.384956			280	0.291098	0.291636		280	0.173289	0.194838		280	0.0935849	0.156779
281	0.550211	0.463573		281	0.385401			281	0.291089	0.290602		281	0.173935	0.195365		281	0.093891	0.156736
282	0.544957	0.4644		282	0.383724			282	0.29158	0.2892		282	0.17363	0.195083		282	0.0939345	0.156795
283	0.54566	0.463945		283	0.382427			283	0.291708	0.290929		283	0.17364	0.19454		283	0.0935011	0.156441
284	0.5449	0.463599		284	0.384527			284	0.289478	0.290121		284	0.172136	0.194399		284	0.0934718	0.155287
285	0.543934	0.462146		285	0.384814			285	0.289762	0.28917		285	0.172496	0.194117		285	0.0934977	0.155307
286	0.542854	0.462916		286	0.381983			286	0.288672	0.289796		286	0.171842	0.19381		286	0.092917	0.154779
287	0.540815	0.46314		287	0.380391			287	0.286977	0.288723		287	0.171935	0.193676		287	0.0925608	0.154244
288	0.540108	0.462807		288	0.383013			288	0.286163	0.289628		288	0.17172	0.193058		288	0.0931325	0.154776
289	0.540207	0.462515		289	0.381976			289	0.286535	0.288017		289	0.171468	0.19352		289	0.0924216	0.153831
290	0.539324	0.462788		290	0.381048			290	0.285457	0.288384		290	0.170634	0.192375		290	0.0918981	0.153755
291	0.542306	0.462435		291	0.380962			291	0.287294	0.287503		291	0.170876	0.192139		291	0.0922598	0.153023
292	0.540251	0.460854		292	0.380823			292	0.284297	0.287459		292	0.170029	0.190953		292	0.0930085	0.153329
293	0.538755	0.461063		293	0.379331			293	0.286365	0.286052		293	0.169848	0.191483		293	0.091988	0.152851
294	0.536877	0.460718		294	0.38056			294	0.283951	0.286521		294	0.169934	0.191097		294	0.0915592	0.152849
295	0.538658	0.460017		295	0.378004			295	0.284678	0.286828		295	0.168908	0.190769		295	0.0914492	0.151788
296	0.540587	0.460958		296	0.378334			296	0.283814	0.285379		296	0.169656	0.190114		296	0.0915639	0.152034
297	0.53615	0.46101		297	0.379589			297	0.284831	0.287803		297	0.168447	0.190367		297	0.0912156	0.152444
298	0.543637	0.46139		298	0.377658			298	0.282147	0.285142		298	0.169259	0.189278		298	0.0908682	0.151848
299	0.542683	0.458634		299	0.37933			299	0.283151	0.285115		299	0.167339	0.189281		299	0.090694	0.150632
300	0.541183	0.459287		300	0.377447			300	0.282281	0.285337		300	0.167977	0.188399		300	0.0910964	0.15052
301	0.546504	0.459402		301	0.377043			301	0.283165	0.283638		301	0.167229	0.188286		301	0.0905685	0.150999
302	0.542708	0.459475		302	0.376472			302	0.281658	0.283379		302	0.166544	0.187984		302	0.0903509	0.15092
303	0.540758	0.460933		303	0.377199			303	0.28104	0.282855		303	0.166578	0.187222		303	0.0900726	0.150051
304	0.543892	0.458867		304	0.375984			304	0.281081	0.283191		304	0.165696	0.188259		304	0.089988	0.15004
305	0.53867	0.460514		305	0.375685			305	0.281191	0.283048		305	0.165898	0.187389		305	0.0899077	0.148963
306	0.540225	0.459709		306	0.3746			306	0.280838	0.282207		306	0.166489	0.186901		306	0.0896768	0.149417
307	0.540822	0.459933		307	0.375773			307	0.279681	0.281926		307	0.16533	0.187837		307	0.0894793	0.14869
308	0.53547	0.459025		308	0.376461			308	0.277331	0.282614		308	0.164936	0.185471		308	0.0889701	0.148106
309	0.53987	0.459366		309	0.373198			309	0.277148	0.282089		309	0.16493	0.186345		309	0.0886996	0.148117
310	0.535871	0.457006		310	0.373337			310	0.279274	0.281402		310	0.165219	0.185534		310	0.0885073	0.147903
311	0.541055	0.45754		311	0.371872			311	0.277509	0.2803		311	0.164599	0.185216		311	0.0884614	0.147524
312	0.539927	0.457682		312	0.372738			312	0.277225	0.281613		312	0.164055	0.185269		312	0.0879797	0.148214
313	0.543137	0.456645		313	0.371971			313	0.275759	0.281071		313	0.163717	0.185396		313	0.088394	0.147385
314	0.53647	0.457224		314	0.371783			314	0.275128	0.280005		314	0.163915	0.185669		314	0.0877596	0.146913
315	0.538582	0.456226		315	0.372093			315	0.275505	0.27928		315	0.163417	0.184707		315	0.0880899	0.146627
316	0.538075	0.454527		316	0.370001			316	0.27658	0.279889		316	0.162936	0.183748		316	0.0878564	0.146495
317	0.535488	0.455286		317	0.370996			317	0.276014	0.279224		317	0.162919	0.183818		317	0.0879803	0.146014
318	0.536924	0.457183		318	0.370239			318	0.275374	0.278891		318	0.162223	0.183347		318	0.0879544	0.146108
319	0.537526	0.455371		319	0.370619			319	0.273286	0.27807		319	0.162627	0.182727		319	0.0871328	0.145407
320	0.539887	0.454646		320	0.372032			320	0.274435	0.27785		320	0.161249	0.181727		320	0.0876044	0.145204
321	0.537027	0.454301		321	0.370938			321	0.27457	0.277662		321	0.161888	0.182302		321	0.0872001	0.145116
322	0.535386	0.455462		322	0.37035			322	0.274287	0.276926		322	0.161943	0.182722		322	0.0872599	0.145249
323	0.536979	0.456284		323	0.369452			323	0.272819	0.276965		323	0.160517	0.182122		323	0.0876275	0.145273
324	0.53666	0.455233		324	0.368811			324	0.272462	0.276093		324	0.161788	0.181626		324	0.0874922	0.144084
325	0.538885	0.454963		325	0.367538			325	0.272501	0.276381		325	0.161308	0.181345		325	0.0881218	0.144518
326	0.541043	0.453364		326	0.369534			326	0.273884	0.276796		326	0.16066	0.181221		326	0.0886503	0.143392
327	0.539661	0.454489		327	0.366185			327	0.272336	0.276751		327	0.160089	0.18044		327	0.0874925	0.14331
328	0.537775	0.454009		328	0.367894			328	0.27136	0.275838		328	0.159688	0.180542		328	0.0864219	0.143875
329	0.531547	0.454545		329	0.368552			329	0.271706	0.275324		329	0.160264	0.181022		329	0.0861726	0.142817
330	0.533253	0.454366		330	0.369097			330	0.270133	0.274844		330	0.160396	0.180321		330	0.0859766	0.142559
331	0.534407	0.451929		331	0.366738			331	0.270389	0.273719		331	0.158728	0.179378		331	0.0865962	0.141716
332	0.535908	0.453429		332	0.365979			332	0.269321	0.273668		332	0.15908	0.179447		332	0.0868877	0.142593
333	0.537789	0.453156		333	0.366586			333	0.268803	0.274794		333	0.158867	0.179348		333	0.0872414	0.14183
334	0.538868	0.454395		334	0.365323			334	0.268292	0.274238		334	0.158981	0.178627		334	0.0863102	0.141874
335	0.534591	0.453197		335	0.36503			335	0.268238	0.274843		335	0.15836	0.178174		335	0.0865849	0.141341
336	0.533914	0.452989		336	0.365127			336	0.267914	0.274426		336	0.157559	0.178134		336	0.085472	0.141527
337	0.532412	0.454184		337	0.36534			337	0.269304	0.273028		337	0.157733	0.178941		337	0.0857232	0.141362
338	0.53379	0.453353		338	0.366173			338	0.26826	0.272887		338	0.157334	0.178023		338	0.0860289	0.140825
339	0.53692	0.452039		339	0.365656			339	0.267339	0.272588		339	0.157556	0.176489		339	0.0853559	0.141128
340	0.532787	0.452966		340	0.362541			340	0.267417	0.27134		340	0.156364	0.177383		340	0.0857634	0.140379
341	0.535264	0.451359		341	0.364339			341	0.265975	0.272157		341	0.15628	0.177074		341	0.0853406	0.140664
342	0.534326	0.453574		342	0.364088			342	0.264904	0.271988		342	0.1566	0.176272		342	0.0859912	0.139948
343	0.536004	0.451478		343	0.364123			343	0.264841	0.270918		343	0.156979	0.176786		343	0.0856378	0.139923
344	0.532696	0.453245		344	0.36195			344	0.264524	0.271134		344	0.15513	0.175676		344	0.08562	0.139765
345	0.532477	0.450676		345	0.363766			345	0.26321	0.271853		345	0.155357	0.176442		345	0.0850269	0.139861
346	0.533958	0.449929		346	0.360647			346	0.265174	0.270561		346	0.155604	0.176183		346	0.0846075	0.139023
347	0.531362	0.450411		347	0.360791			347	0.264546	0.270844		347	0.155886	0.176358		347	0.0852275	0.138654
348	0.533531	0.450758		348	0.363722			348	0.263586	0.27017		348	0.156084	0.175615		348	0.0849219	0.138251
349	0.533088	0.450538		349	0.360145			349	0.263868	0.269234		349	0.155066	0.175157		349	0.0852367	0.138767
350	0.529635	0.451645		350	0.361974			350	0.263955	0.268786		350	0.155075	0.175424		350	0.0843149	0.138529
351	0.529382	0.449725		351	0.363128			351	0.263114	0.269653		351	0.155188	0.174864		351	0.0833292	0.138107
352	0.53291	0.450421		352	0.363251			352	0.262585	0.269508		352	0.155048	0.174825		352	0.0839994	0.13793
353	0.53434	0.448657		353	0.360492			353	0.262778	0.268443		353	0.154614	0.174052		353	0.0839414	0.137258
354	0.529104	0.451348		354	0.359993			354	0.262014	0.268728		354	0.154332	0.174154		354	0.0839122	0.137238
355	0.528993	0.448884		355	0.361519			355	0.261685	0.269323		355	0.153574	0.173545		355	0.0844147	0.13694
356	0.526455	0.448808		356	0.359597			356	0.260834	0.268644		356	0.153552	0.172977		356	0.0835332	0.137158
357	0.535246	0.446957		357	0.360642			357	0.261962	0.268591		357	0.153891	0.173009		357	0.0838839	0.136254
358	0.533216	0.447573		358	0.359847			358	0.261674	0.267508		358	0.152904	0.172749		358	0.0826692	0.136527
359	0.534789	0.44978		359	0.358742			359	0.260112	0.266598		359	0.152963	0.172721		359	0.0839895	0.136772
360	0.529292	0.450054		360	0.357636			360	0.261651	0.266548		360	0.15271	0.172825		360	0.0827116	0.136542
361	0.529544	0.44877		361	0.358803			361	0.25923	0.266401		361	0.151984	0.172109		361	0.0824944	0.13609
362	0.530007	0.448981		362	0.357408			362	0.260905	0.266003		362	0.15297	0.171679		362	0.0825634	0.135486
363	0.5286	0.448222		363	0.358775			363	0.258728	0.267004		363	0.151731	0.171305		363	0.0823592	0.135959
364	0.532386	0.448519		364	0.356891			364	0.258701	0.267769		364	0.152336	0.171518		364	0.0826307	0.136098
365	0.529782	0.445897		365	0.357703			365	0.258111	0.26517		365	0.151602	0.171273		365	0.082914	0.134969
366	0.532511	0.44622		366	0.358938			366	0.25809	0.265956		366	0.151245	0.170896		366	0.0825588	0.134924
367	0.529856	0.448678		367	0.356741			367	0.258251	0.265098		367	0.150638	0.170861		367	0.0831997	0.135433
368	0.529085	0.446984		368	0.355578			368	0.259209	0.265013		368	0.151262	0.170792		368	0.0819019	0.134666
369	0.530573	0.447599		369	0.356522			369	0.259734	0.265112		369	0.151012	0.170442		369	0.0825132	0.134686
370	0.527245	0.446151		370	0.356244			370	0.258623	0.264068		370	0.150619	0.170617		370	0.0827138	0.133976
371	0.527282	0.445484		371	0.356054			371	0.259999	0.265958		371	0.150501	0.170118		371	0.0814028	0.134153
372	0.529254	0.446535		372	0.354327			372	0.255816	0.264454		372	0.150231	0.170213		372	0.081327	0.133847
373	0.527419	0.44553		373	0.354571			373	0.258146	0.264796		373	0.150406	0.169446		373	0.0824519	0.133335
374	0.528792	0.446872		374	0.354709			374	0.256796	0.263745		374	0.150643	0.169602		374	0.0819254	0.133488
375	0.528876	0.44391		375	0.353725			375	0.257771	0.263353		375	0.150217	0.16951		375	0.081583	0.13321
376	0.528058	0.445444		376	0.354944			376	0.256275	0.263638		376	0.149848	0.168968		376	0.0822193	0.13353
377	0.530572	0.444653		377	0.353016			377	0.258134	0.263633		377	0.149664	0.169154		377	0.0820709	0.133442
378	0.528481	0.446254		378	0.353612			378	0.253872	0.263731		378	0.148783	0.167936		378	0.0805456	0.132633
379	0.528238	0.445124		379	0.353969			379	0.254923	0.263236		379	0.149539	0.168428		379	0.0813513	0.132381
380	0.525266	0.446337		380	0.353748			380	0.256281	0.263584		380	0.147832	0.168217		380	0.0815652	0.13202
381	0.523221	0.445372		381	0.352715			381	0.256341	0.261889		381	0.148286	0.168312		381	0.0813395	0.132509
382	0.518156	0.445897		382	0.354648			382	0.254973	0.261051		382	0.14875	0.16836		382	0.0812425	0.131771
383	0.519539	0.445758		383	0.352206			383	0.254238	0.262803		383	0.147891	0.167717		383	0.0808846	0.131436
384	0.521417	0.443604		384	0.351475			384	0.254689	0.26206		384	0.148356	0.166818		384	0.0808052	0.131366
385	0.520581	0.443986		385	0.352576			385	0.253555	0.262156		385	0.148449	0.167542		385	0.0811855	0.131577
386	0.520628	0.444705		386	0.352433			386	0.254861	0.261126		386	0.148783	0.166992		386	0.0802553	0.131177
387	0.518386	0.444201		387	0.349379			387	0.253512	0.261476		387	0.147821	0.167182		387	0.0808138	0.131331
388	0.519476	0.444157		388	0.352873			388	0.252657	0.260763		388	0.14844	0.166322		388	0.0799553	0.130781
389	0.519672	0.441973		389	0.351575			389	0.255433	0.260314		389	0.148583	0.165966		389	0.0805648	0.130417
390	0.520956	0.443224		390	0.351147			390	0.253488	0.26157		390	0.147499	0.166964		390	0.0816103	0.13069
391	0.519603	0.443877		391	0.350269			391	0.251743	0.260343		391	0.146109	0.16581		391	0.0802159	0.129972
392	0.525785	0.444381		392	0.350447			392	0.253712	0.260126		392	0.147414	0.16566		392	0.0805692	0.129954
393	0.52669	0.443746		393	0.35094			393	0.251491	0.259497		393	0.14659	0.165618		393	0.0805703	0.129887
394	0.526409	0.442318		394	0.350405			394	0.250496	0.258112		394	0.146214	0.165482		394	0.0807776	0.129998
395	0.526778	0.44436		395	0.351207			395	0.248966	0.258717		395	0.146649	0.16505		395	0.0799519	0.129421
396	0.5225	0.444362		396	0.346939			396	0.250063	0.260433		396	0.146363	0.164693		396	0.0797268	0.129025
397	0.524932	0.441799		397	0.350521			397	0.249928	0.258823		397	0.146668	0.164901		397	0.0803159	0.129379
398	0.526687	0.441762		398	0.349829			398	0.249454	0.257673		398	0.146061	0.164439		398	0.0811538	0.128839
399	0.526947	0.442433		399	0.348635			399	0.250082	0.258887		399	0.146574	0.164149		399	0.0789127	0.129014
400	0.52786	0.442934		400	0.348435			400	0.247658	0.258507		400	0.145219	0.163672		400	0.079383	0.1289
401	0.526006	0.440275		401	0.348569			401	0.248466	0.257575		401	0.145156	0.163832		401	0.0792967	0.129113
402	0.517993	0.44072		402	0.348741			402	0.247572	0.258319		402	0.144317	0.164113		402	0.0798063	0.128527
403	0.516205	0.442436		403	0.346627			403	0.248911	0.258267		403	0.144504	0.163193		403	0.0778525	0.128881
404	0.521349	0.442334		404	0.348966			404	0.249676	0.257216		404	0.144633	0.163879		404	0.0787932	0.128366
405	0.51715	0.440727		405	0.348383			405	0.246623	0.257745		405	0.144588	0.163498		405	0.0793309	0.127826
406	0.516597	0.441329		406	0.346889			406	0.247535	0.256549		406	0.144898	0.162657		406	0.0797179	0.127041
407	0.516157	0.439519		407	0.348248			407	0.247902	0.255652		407	0.143955	0.162619		407	0.0786403	0.127656
408	0.520261	0.441499		408	0.345842			408	0.24636	0.256313		408	0.143688	0.162326		408	0.0787898	0.127609
409	0.517532	0.441486		409	0.345197			409	0.246336	0.255819		409	0.144009	0.16211		409	0.0783973	0.128044
410	0.517871	0.441277		410	0.34548			410	0.246701	0.255815		410	0.144124	0.163186		410	0.0786895	0.127419
411	0.517726	0.439565		411	0.346968			411	0.245829	0.255865		411	0.143548	0.162659		411	0.0790833	0.127125
412	0.515675	0.440569		412	0.34708			412	0.246274	0.255147		412	0.143633	0.162304		412	0.0778363	0.126847
413	0.512861	0.439354		413	0.344253			413	0.246342	0.254964		413	0.143591	0.161333		413	0.0790086	0.127209
414	0.518162	0.4416		414	0.34444			414	0.245437	0.255091		414	0.143182	0.161144		414	0.0789251	0.126987
415	0.519385	0.439834		415	0.345663			415	0.244592	0.253925		415	0.143079	0.160449		415	0.0782136	0.126254
416	0.51779	0.439147		416	0.343756			416	0.245273	0.254465		416	0.143103	0.161359		416	0.0786089	0.125694
417	0.516549	0.44005		417	0.344912			417	0.244891	0.254231		417	0.142939	0.162071		417	0.0785095	0.126705
418	0.514425	0.439413		418	0.343634			418	0.244336	0.25477		418	0.142239	0.160881		418	0.0777646	0.126512
419	0.51331	0.439588		419	0.345135			419	0.243504	0.254653		419	0.141997	0.161004		419	0.0787057	0.126088
420	0.515363	0.439662		420	0.341673			420	0.244161	0.254197		420	0.142183	0.160818		420	0.0781184	0.125827
421	0.516108	0.438182		421	0.344731			421	0.243808	0.254639		421	0.142271	0.15949		421	0.0785149	0.126076
422	0.51505	0.437972		422	0.342911			422	0.244109	0.254125		422	0.141721	0.159272		422	0.0776066	0.126584
423	0.523429	0.437538		423	0.341988			423	0.243157	0.254365		423	0.141913	0.160445		423	0.077968	0.12634
424	0.521294	0.438929		424	0.343908			424	0.241675	0.252451		424	0.141402	0.159505		424	0.0781983	0.125376
425	0.520662	0.439191		425	0.342479			425	0.243254	0.252783		425	0.141012	0.159566		425	0.0776815	0.1251
426	0.517139	0.437973		426	0.340494			426	0.243184	0.251848		426	0.141284	0.159895		426	0.0779855	0.126031
427	0.520788	0.437366		427	0.344186			427	0.242946	0.251915		427	0.141071	0.15896		427	0.077414	0.124571
428	0.52182	0.437534		428	0.342758			428	0.242578	0.251887		428	0.141192	0.158064		428	0.0762227	0.124983
429	0.522353	0.43673		429	0.341612			429	0.240739	0.25296		429	0.141005	0.159348		429	0.0775101	0.12462
430	0.520524	0.437639		430	0.3397			430	0.240973	0.250855		430	0.140791	0.159476		430	0.0770356	0.12464
431	0.513267	0.43806		431	0.340348			431	0.241827	0.251996		431	0.140895	0.1585		431	0.0775584	0.124297
432	0.513627	0.437221		432	0.341066			432	0.239558	0.252277		432	0.140829	0.158004		432	0.0775524	0.124606
433	0.514651	0.436992		433	0.340838			433	0.239257	0.250474		433	0.140741	0.158228		433	0.0774168	0.124487
434	0.511353	0.436924		434	0.3383			434	0.240348	0.251432		434	0.140103	0.157725		434	0.0777546	0.124266
435	0.513706	0.437021		435	0.341379			435	0.24074	0.251757		435	0.140024	0.158108		435	0.0761508	0.124088
436	0.513518	0.437192		436	0.341119			436	0.240606	0.249992		436	0.139084	0.156709		436	0.076672	0.123968
437	0.515559	0.436577		437	0.34243			437	0.240525	0.250032		437	0.139947	0.156849		437	0.077356	0.12439
438	0.514055	0.435205		438	0.338767			438	0.238791	0.249942		438	0.139326	0.157193		438	0.0770805	0.123327
439	0.513639	0.436151		439	0.338196			439	0.239513	0.250522		439	0.139672	0.157893		439	0.0762561	0.122794
440	0.51732	0.435542		440	0.33919			440	0.238676	0.249588		440	0.139536	0.156436		440	0.0769872	0.124031
441	0.513948	0.435619		441	0.338504			441	0.238271	0.250951		441	0.139683	0.156703		441	0.0767838	0.12277
442	0.517866	0.436553		442	0.339186			442	0.238056	0.248648		442	0.138678	0.156778		442	0.0756855	0.123632
443	0.518328	0.436371		443	0.338056			443	0.23967	0.24847		443	0.139214	0.156655		443	0.0761368	0.123131
444	0.516117	0.436977		444	0.338467			444	0.237876	0.248008		444	0.138734	0.156748		444	0.0759628	0.122344
445	0.516389	0.435727		445	0.337856			445	0.237468	0.248919		445	0.138541	0.156975		445	0.0765139	0.122476
446	0.516381	0.434705		446	0.338195			446	0.237547	0.248977		446	0.139354	0.15606		446	0.0771723	0.121811
447	0.517776	0.435892		447	0.337018			447	0.236338	0.247868		447	0.138858	0.156253		447	0.0760959	0.122005
448	0.517765	0.432256		448	0.337			448	0.236326	0.248063		448	0.138673	0.15591		448	0.0753277	0.122014
449	0.519024	0.434536		449	0.336516			449	0.237384	0.246957		449	0.138674	0.155409		449	0.0755417	0.121729
450	0.516795	0.434467		450	0.335586			450	0.237558	0.247849		450	0.138159	0.155751		450	0.0767312	0.12172
451	0.518205	0.436023		451	0.336239			451	0.238105	0.247385		451	0.137517	0.155096		451	0.0755011	0.121932
452	0.518078	0.435109		452	0.3372			452	0.236714	0.247495		452	0.137816	0.154693		452	0.0764075	0.12164
453	0.517761	0.433663		453	0.336735			453	0.236856	0.247212		453	0.13727	0.155154		453	0.0759613	0.121647
454	0.514749	0.434069		454	0.338567			454	0.235643	0.247114		454	0.137456	0.154312		454	0.0761445	0.121305
455	0.517396	0.433871		455	0.336986			455	0.23515	0.246807		455	0.137395	0.155151		455	0.0765809	0.120959
456	0.51777	0.434397		456	0.335861			456	0.2366	0.2471		456	0.13751	0.154415		456	0.0754298	0.120972
457	0.516252	0.433883		457	0.337723			457	0.234169	0.247103		457	0.137016	0.153888		457	0.0749042	0.12078
458	0.51861	0.432969		458	0.336135			458	0.235269	0.246087		458	0.137508	0.154453		458	0.0758945	0.120225
459	0.518433	0.432871		459	0.336214			459	0.234708	0.2469		459	0.137521	0.154408		459	0.075438	0.120393
460	0.519587	0.433067		460	0.335689			460	0.234426	0.24561		460	0.136509	0.154065		460	0.0748187	0.120918
461	0.51588	0.432061		461	0.334044			461	0.234029	0.245894		461	0.136942	0.154191		461	0.0754734	0.121134
462	0.518787	0.433431		462	0.33495			462	0.235193	0.246086		462	0.136545	0.152883		462	0.075105	0.120174
463	0.512915	0.433384		463	0.333012			463	0.23396	0.245353		463	0.13587	0.152612		463	0.0759429	0.119924
464	0.516723	0.432576		464	0.334229			464	0.234762	0.245418		464	0.136105	0.153424		464	0.0756413	0.119741
465	0.518246	0.433291		465	0.334204			465	0.233082	0.246326		465	0.135768	0.153165		465	0.0750218	0.119595
466	0.518521	0.432554		466	0.335615			466	0.233334	0.244791		466	0.136419	0.152671		466	0.0750225	0.119501
467	0.514994	0.43274		467	0.332472			467	0.233354	0.24422		467	0.13623	0.152177		467	0.0749237	0.119547
468	0.516577	0.433741		468	0.334737			468	0.234136	0.244195		468	0.135867	0.152165		468	0.0751116	0.119744
469	0.514234	0.432326		469	0.334136			469	0.233912	0.243447		469	0.135426	0.151644		469	0.0752734	0.119331
470	0.516077	0.430957		470	0.334336			470	0.232918	0.245663		470	0.134964	0.151832		470	0.0745539	0.118978
471	0.51315	0.431686		471	0.334085			471	0.23402	0.244622		471	0.135312	0.151457		471	0.0745228	0.11926
472	0.519534	0.432219		472	0.334536			472	0.2325	0.244785		472	0.134438	0.150934		472	0.0758099	0.118694
473	0.516132	0.432062		473	0.332141			473	0.232154	0.243364		473	0.135328	0.15138		473	0.0744874	0.118911
474	0.512502	0.432556		474	0.332965			474	0.230624	0.243616		474	0.134735	0.151027		474	0.0747472	0.118832
475	0.511309	0.432119		475	0.33123			475	0.231619	0.243554		475	0.134713	0.151585		475	0.0732683	0.118326
476	0.51445	0.430633		476	0.332199			476	0.232053	0.243521		476	0.134596	0.152006		476	0.0738755	0.118633
477	0.516302	0.432304		477	0.332262			477	0.232036	0.243071		477	0.135048	0.151156		477	0.0739611	0.118596
478	0.510242	0.431221		478	0.33283			478	0.231016	0.243142		478	0.134474	0.15112		478	0.0751777	0.118272
479	0.514834	0.42977		479	0.331997			479	0.231136	0.243321		479	0.134346	0.150748		479	0.0749087	0.117841
480	0.511403	0.431242		480	0.330312			480	0.231059	0.243124		480	0.13481	0.150688		480	0.0741468	0.117407
481	0.515096	0.432141		481	0.330975			481	0.231059	0.242529		481	0.13383	0.150493		481	0.074064	0.117834
482	0.513629	0.429779		482	0.331455			482	0.230443	0.242513		482	0.133905	0.150404		482	0.0742688	0.118053
483	0.511146	0.428399		483	0.32995			483	0.229694	0.243527		483	0.134094	0.149871		483	0.074162	0.117709
484	0.51503	0.430907		484	0.32993			484	0.229188	0.241676		484	0.133072	0.150896		484	0.0743316	0.117296
485	0.511919	0.429706		485	0.333398			485	0.229111	0.241993		485	0.134028	0.150477		485	0.0744167	0.117125
486	0.515904	0.431508		486	0.331979			486	0.229845	0.241491		486	0.132965	0.150526		486	0.0734327	0.116679
487	0.514245	0.430212		487	0.331619			487	0.229058	0.241185		487	0.133262	0.150111		487	0.0728079	0.115799
488	0.513411	0.430061		488	0.33089			488	0.228533	0.24105		488	0.133098	0.149683		488	0.0739683	0.11596
489	0.515153	0.428931		489	0.328727			489	0.22899	0.241454		489	0.133001	0.149594		489	0.0731774	0.115876
490	0.517224	0.428842		490	0.328216			490	0.227933	0.24058		490	0.133235	0.149141		490	0.0743107	0.116087
491	0.512883	0.429774		491	0.327261			491	0.229286	0.240256		491	0.133319	0.149657		491	0.0723158	0.11611
492	0.510998	0.429177		492	0.328945			492	0.229336	0.240559		492	0.133384	0.149241		492	0.0737269	0.116039
493	0.507009	0.428729		493	0.328375			493	0.228106	0.239643		493	0.133373	0.148944		493	0.0725667	0.116005
494	0.503551	0.427654		494	0.32817			494	0.227446	0.241048		494	0.132187	0.148534		494	0.0727583	0.116002
495	0.503776	0.428021		495	0.328251			495	0.227851	0.241034		495	0.131978	0.147607		495	0.0730442	0.115868
496	0.50417	0.428486		496	0.327891			496	0.228606	0.241741		496	0.132037	0.147786		496	0.0734277	0.115465
497	0.504621	0.428478		497	0.328735			497	0.228283	0.238585		497	0.132275	0.147756		497	0.073552	0.114981
498	0.509263	0.428004		498	0.32896			498	0.227078	0.239515		498	0.132161	0.147167		498	0.0725009	0.1152
499	0.51165	0.428424		499	0.329433			499	0.226731	0.240086		499	0.131519	0.146943		499	0.0732647	0.115177
500	0.508299	0.430696		500	0.328696			500	0.226909	0.239224		500	0.132485	0.146899		500	0.0736929	0.115227
501	0.508924	0.428531		501	0.327152			501	0.226221	0.239009		501	0.13145	0.147554		501	0.0733144	0.114419
502	0.511544	0.427118		502	0.3279			502	0.225397	0.239292		502	0.131899	0.146832		502	0.0727693	0.115164
503	0.508783	0.427972		503	0.328663			503	0.226484	0.238873		503	0.131527	0.146694		503	0.0729283	0.114421
504	0.510118	0.427237		504	0.325747			504	0.225891	0.238295		504	0.131386	0.147315		504	0.0724869	0.114585
505	0.511484	0.426719		505	0.32676			505	0.226603	0.238167		505	0.131386	0.146487		505	0.0720019	0.114121
506	0.507333	0.427721		506	0.326071			506	0.225958	0.23747		506	0.13116	0.146506		506	0.0731549	0.114538
507	0.514473	0.427473		507	0.325337			507	0.225556	0.238158		507	0.130947	0.146654		507	0.0724989	0.113906
508	0.510629	0.427755		508	0.326461			508	0.2271	0.237514		508	0.131283	0.146621		508	0.0733307	0.115067
509	0.510134	0.426384		509	0.327023			509	0.224645	0.237741		509	0.13109	0.146538		509	0.072155	0.114324
510	0.511034	0.426351		510	0.326807			510	0.225151	0.237929		510	0.130841	0.146024		510	0.0722968	0.113933
511	0.512736	0.425867		511	0.325002			511	0.224844	0.237549		511	0.130946	0.146514		511	0.0721328	0.113174
512	0.508225	0.425384		512	0.32517			512	0.224352	0.236784		512	0.131003	0.147215		512	0.0724571	0.113438
513	0.510929	0.42753		513	0.327188			513	0.224901	0.236731		513	0.130589	0.145935		513	0.0729525	0.113797
514	0.508733	0.428158		514	0.323353			514	0.224075	0.236985		514	0.131019	0.146587		514	0.0727038	0.113903
515	0.507241	0.426702		515	0.324821			515	0.224972	0.236913		515	0.13055	0.145628		515	0.0729252	0.112975
516	0.511175	0.426514		516	0.326756			516	0.224808	0.236599		516	0.130552	0.145183		516	0.0728643	0.113248
517	0.511272	0.42631		517	0.323724			517	0.224336	0.23615		517	0.130459	0.145748		517	0.072713	0.112714
518	0.510304	0.426676		518	0.325733			518	0.224133	0.238386		518	0.129769	0.145772		518	0.0728132	0.113024
519	0.511829	0.426756		519	0.324647			519	0.223217	0.236647		519	0.129933	0.145533		519	0.0716153	0.113057
520	0.505819	0.425316		520	0.325009			520	0.223581	0.236259		520	0.129857	0.145345		520	0.0721159	0.112092
521	0.507471	0.426254		521	0.323061			521	0.223252	0.235927		521	0.129826	0.145294		521	0.0726094	0.112713
522	0.50693	0.425103		522	0.325831			522	0.223228	0.235755		522	0.129602	0.145073		522	0.0709847	0.112497
523	0.50041	0.423987		523	0.32345			523	0.223092	0.236453		523	0.12963	0.144364		523	0.0723566	0.112601
524	0.502579	0.424935		524	0.323952			524	0.221687	0.235732		524	0.129	0.145557		524	0.0719171	0.112822
525	0.504419	0.424997		525	0.323693			525	0.222179	0.234716		525	0.129424	0.144004		525	0.0726989	0.112696
526	0.509303	0.42649		526	0.320362			526	0.223378	0.235773		526	0.129756	0.145091		526	0.0715444	0.111873
527	0.503881	0.42454		527	0.323175			527	0.221786	0.235151		527	0.129882	0.144522		527	0.0719827	0.112105
528	0.499629	0.425341		528	0.321982			528	0.221479	0.234975		528	0.129165	0.144098		528	0.0726036	0.112
529	0.502718	0.42466		529	0.322205			529	0.222793	0.235171		529	0.129001	0.143821		529	0.0716608	0.112274
530	0.508777	0.423667		530	0.321502			530	0.222073	0.234274		530	0.129255	0.144795		530	0.0720612	0.111764
531	0.50763	0.423946		531	0.321507			531	0.22112	0.234392		531	0.128533	0.143773		531	0.0717035	0.111314
532	0.510085	0.424251		532	0.322362			532	0.22095	0.23401		532	0.128976	0.14338		532	0.0704544	0.110828
533	0.508077	0.424743		533	0.323334			533	0.2211	0.23448		533	0.128797	0.143356		533	0.0705215	0.111731
534	0.504532	0.424939		534	0.32179			534	0.221435	0.233168		534	0.129006	0.144215		534	0.0703055	0.111549
535	0.509751	0.423274		535	0.323528			535	0.222097	0.233185		535	0.128822	0.14357		535	0.0705292	0.11119
536	0.507058	0.423447		536	0.321517			536	0.220624	0.233383		536	0.127024	0.143551		536	0.0702145	0.110787
537	0.507942	0.424103		537	0.320166			537	0.221173	0.233122		537	0.127542	0.143385		537	0.0711153	0.111667
538	0.508593	0.422739		538	0.322016			538	0.220744	0.233277		538	0.127694	0.143419		538	0.0702224	0.111595
539	0.506459	0.424136		539	0.322562			539	0.220365	0.234143		539	0.127494	0.143408		539	0.0699556	0.110862
540	0.509384	0.423346		540	0.321562			540	0.220726	0.233824		540	0.128244	0.142869		540	0.070916	0.111177
541	0.504305	0.422874		541	0.321932			541	0.221418	0.232347		541	0.127869	0.142653		541	0.0702717	0.110922
542	0.504882	0.42195		542	0.320978			542	0.220739	0.233414		542	0.127512	0.142854		542	0.0699128	0.111364
543	0.510288	0.423238		543	0.320773			543	0.219896	0.232443		543	0.127812	0.142605		543	0.0700347	0.110308
544	0.506054	0.420725		544	0.32021			544	0.218783	0.23176		544	0.127995	0.142731		544	0.0701162	0.110219
545	0.507095	0.422783		545	0.319269			545	0.218488	0.231419		545	0.127582	0.141924		545	0.0700964	0.110982
546	0.507283	0.422564		546	0.319393			546	0.218632	0.233321		546	0.127002	0.142302		546	0.0696595	0.110722
547	0.50311	0.42353		547	0.321286			547	0.220366	0.231787		547	0.127414	0.141545		547	0.0694668	0.110127
548	0.503891	0.421102		548	0.319996			548	0.218594	0.2318		548	0.127655	0.142468		548	0.0695201	0.110221
549	0.506005	0.421091		549	0.318247			549	0.218549	0.232263		549	0.126913	0.141823		549	0.0688314	0.110566
550	0.508578	0.423634		550	0.319446			550	0.219488	0.231805		550	0.126734	0.141628		550	0.0694599	0.110206
551	0.505545	0.421245		551	0.318967			551	0.217839	0.231733		551	0.126549	0.141595		551	0.069671	0.110299
552	0.501709	0.421958		552	0.319669			552	0.218395	0.231517		552	0.12683	0.141637		552	0.0697752	0.109251
553	0.506557	0.423407		553	0.318021			553	0.218755	0.23166		553	0.126056	0.140609		553	0.0696	0.109599
554	0.505214	0.423273		554	0.317978			554	0.216948	0.230919		554	0.126947	0.141352		554	0.0716539	0.110203
555	0.506693	0.421613		555	0.317355			555	0.217766	0.231336		555	0.1261	0.141028		555	0.0719498	0.109188
556	0.505617	0.421973		556	0.320064			556	0.218373	0.230173		556	0.126205	0.141166		556	0.070111	0.109477
557	0.503405	0.4215		557	0.316509			557	0.216731	0.231259		557	0.125717	0.141489		557	0.0704464	0.109919
558	0.506703	0.420279		558	0.318886			558	0.217251	0.23117		558	0.126208	0.141253		558	0.0703591	0.108935
559	0.505574	0.419744		559	0.317067			559	0.217593	0.230732		559	0.126499	0.140928		559	0.0701672	0.109304
560	0.499544	0.421417		560	0.317498			560	0.217303	0.23012		560	0.125619	0.140673		560	0.0709535	0.109568
561	0.496501	0.421523		561	0.317383			561	0.215214	0.230417		561	0.125723	0.140438		561	0.0706987	0.10914
562	0.500196	0.420737		562	0.315969			562	0.216934	0.230219		562	0.125388	0.140832		562	0.0696058	0.109812
563	0.499313	0.420035		563	0.315983			563	0.216411	0.229558		563	0.125919	0.140098		563	0.0698976	0.10921
564	0.495168	0.420836		564	0.316227			564	0.216711	0.230588		564	0.125666	0.140258		564	0.0702049	0.108816
565	0.494917	0.421714		565	0.315579			565	0.216956	0.230006		565	0.125237	0.14083		565	0.0698957	0.108939
566	0.497871	0.420278		566	0.317582			566	0.216029	0.229319		566	0.125253	0.140136		566	0.0694891	0.108704
567	0.499722	0.421142		567	0.317126			567	0.215254	0.229191		567	0.125941	0.139599		567	0.0700278	0.108685
568	0.499982	0.420399		568	0.315464			568	0.214233	0.229218		568	0.125429	0.140024		568	0.0697959	0.10931
569	0.494318	0.419943		569	0.316305			569	0.215278	0.228867		569	0.125217	0.139567		569	0.0693827	0.108453
570	0.49601	0.419049		570	0.317026			570	0.215054	0.228917		570	0.124671	0.139133		570	0.0699968	0.108398
571	0.497128	0.421955		571	0.315609			571	0.215291	0.228088		571	0.125065	0.13954		571	0.0698548	0.108184
572	0.498518	0.418449		572	0.31572			572	0.214591	0.228947		572	0.125064	0.138902		572	0.0705265	0.108139
573	0.50262	0.419019		573	0.315677			573	0.215036	0.229042		573	0.125151	0.13894		573	0.0696431	0.107644
574	0.503946	0.419676		574	0.315143			574	0.214	0.229038		574	0.124396	0.139496		574	0.0695803	0.107986
575	0.501326	0.418942		575	0.313379			575	0.214921	0.228007		575	0.125108	0.138615		575	0.070133	0.107298
576	0.50345	0.420213		576	0.314619			576	0.214354	0.228962		576	0.12406	0.138881		576	0.0700721	0.107652
577	0.502264	0.419718		577	0.315279			577	0.214169	0.227633		577	0.124201	0.138278		577	0.0694945	0.107659
578	0.502998	0.419861		578	0.314757			578	0.213997	0.228295		578	0.124646	0.138676		578	0.07037	0.107617
579	0.50081	0.420317		579	0.315518			579	0.213265	0.22767		579	0.124226	0.138099		579	0.069681	0.107181
580	0.502086	0.419126		580	0.314628			580	0.214044	0.226827		580	0.124394	0.138899		580	0.0694793	0.107678
581	0.500518	0.41938		581	0.313124			581	0.213721	0.227496		581	0.124018	0.138226		581	0.0698856	0.107145
582	0.50053	0.420457		582	0.313792			582	0.212875	0.226911		582	0.123267	0.138774		582	0.0691493	0.107202
583	0.500696	0.418359		583	0.314193			583	0.21284	0.22658		583	0.124007	0.137709		583	0.0699199	0.106694
584	0.502546	0.419505		584	0.315424			584	0.213146	0.227074		584	0.123488	0.138358		584	0.0706739	0.106759
585	0.502329	0.418237		585	0.311838			585	0.214578	0.22725		585	0.123563	0.137802		585	0.0698605	0.106882
586	0.501017	0.416512		586	0.314069			586	0.212239	0.226915		586	0.123785	0.138054		586	0.0691576	0.106695
587	0.499448	0.417046		587	0.313974			587	0.213941	0.226873		587	0.123925	0.137804		587	0.0688571	0.106427
588	0.498734	0.41737		588	0.312402			588	0.213442	0.226041		588	0.123293	0.137798		588	0.0701212	0.107165
589	0.500006	0.418042		589	0.314322			589	0.212132	0.226178		589	0.123486	0.137617		589	0.0692103	0.10656
590	0.503605	0.417478		590	0.311772			590	0.212323	0.226922		590	0.123012	0.137158		590	0.0700816	0.106282
591	0.500316	0.417962		591	0.313143			591	0.212395	0.225387		591	0.122892	0.137171		591	0.0694698	0.106225
592	0.501759	0.416604		592	0.311386			592	0.211512	0.226477		592	0.123001	0.137732		592	0.0704395	0.106771
593	0.500113	0.415755		593	0.312181			593	0.211583	0.226052		593	0.122914	0.137055		593	0.0692787	0.106651
594	0.496761	0.418345		594	0.312829			594	0.211499	0.225829		594	0.122596	0.136578		594	0.0701097	0.105853
595	0.502894	0.417064		595	0.312868			595	0.211164	0.225812		595	0.122741	0.136875		595	0.0691724	0.105963
596	0.499966	0.417262		596	0.309178			596	0.211339	0.226155		596	0.122107	0.136312		596	0.0685742	0.10569
597	0.499551	0.41775		597	0.310745			597	0.212342	0.225337		597	0.122319	0.136301		597	0.0692682	0.10617
598	0.501244	0.418008		598	0.311093			598	0.211663	0.225048		598	0.121983	0.136807		598	0.0687082	0.105684
599	0.498046	0.415246		599	0.312278			599	0.211157	0.225908		599	0.122404	0.136838		599	0.069416	0.105378
600	0.502062	0.41736		600	0.309829			600	0.210406	0.225913		600	0.122574	0.136523		600	0.06963	0.104472
	#DIV/0!	#DIV/0!			#DIV/0!				#DIV/0!	#DIV/0!			#DIV/0!	#DIV/0!			#DIV/0!	#DIV/0!
	#DIV/0!	#DIV/0!			#DIV/0!				#DIV/0!	#DIV/0!			#DIV/0!	#DIV/0!			#DIV/0!	#DIV/0!
	#DIV/0!	#DIV/0!			#DIV/0!				#DIV/0!	#DIV/0!			#DIV/0!	#DIV/0!			#DIV/0!	#DIV/0!
	#DIV/0!	#DIV/0!			#DIV/0!				#DIV/0!	#DIV/0!			#DIV/0!	#DIV/0!			#DIV/0!	#DIV/0!
	#DIV/0!	#DIV/0!			#DIV/0!				#DIV/0!	#DIV/0!			#DIV/0!	#DIV/0!			#DIV/0!	#DIV/0!
	#DIV/0!	#DIV/0!			#DIV/0!				#DIV/0!	#DIV/0!			#DIV/0!	#DIV/0!			#DIV/0!	#DIV/0!
	#DIV/0!	#DIV/0!			#DIV/0!				#DIV/0!	#DIV/0!			#DIV/0!	#DIV/0!			#DIV/0!	#DIV/0!
	#DIV/0!	#DIV/0!			#DIV/0!				#DIV/0!	#DIV/0!			#DIV/0!	#DIV/0!			#DIV/0!	#DIV/0!
	#DIV/0!	#DIV/0!			#DIV/0!				#DIV/0!	#DIV/0!			#DIV/0!	#DIV/0!			#DIV/0!	#DIV/0!
	#DIV/0!	#DIV/0!			#DIV/0!				#DIV/0!	#DIV/0!			#DIV/0!	#DIV/0!			#DIV/0!	#DIV/0!
	#DIV/0!	#DIV/0!			#DIV/0!				#DIV/0!	#DIV/0!			#DIV/0!	#DIV/0!			#DIV/0!	#DIV/0!
	#DIV/0!	#DIV/0!			#DIV/0!				#DIV/0!	#DIV/0!			#DIV/0!	#DIV/0!			#DIV/0!	#DIV/0!
	#DIV/0!	#DIV/0!			#DIV/0!				#DIV/0!	#DIV/0!			#DIV/0!	#DIV/0!			#DIV/0!	#DIV/0!
	#DIV/0!	#DIV/0!			#DIV/0!				#DIV/0!	#DIV/0!			#DIV/0!	#DIV/0!			#DIV/0!	#DIV/0!
	#DIV/0!	#DIV/0!			#DIV/0!				#DIV/0!	#DIV/0!			#DIV/0!	#DIV/0!			#DIV/0!	#DIV/0!
	#DIV/0!	#DIV/0!			#DIV/0!				#DIV/0!	#DIV/0!			#DIV/0!	#DIV/0!			#DIV/0!	#DIV/0!
	#DIV/0!	#DIV/0!			#DIV/0!				#DIV/0!	#DIV/0!			#DIV/0!	#DIV/0!			#DIV/0!	#DIV/0!
	#DIV/0!	#DIV/0!			#DIV/0!				#DIV/0!	#DIV/0!			#DIV/0!	#DIV/0!			#DIV/0!	#DIV/0!
	#DIV/0!	#DIV/0!			#DIV/0!				#DIV/0!	#DIV/0!			#DIV/0!	#DIV/0!			#DIV/0!	#DIV/0!
	#DIV/0!	#DIV/0!			#DIV/0!				#DIV/0!	#DIV/0!			#DIV/0!	#DIV/0!			#DIV/0!	#DIV/0!
	#DIV/0!	#DIV/0!			#DIV/0!				#DIV/0!	#DIV/0!			#DIV/0!	#DIV/0!			#DIV/0!	#DIV/0!
	#DIV/0!	#DIV/0!			#DIV/0!				#DIV/0!	#DIV/0!			#DIV/0!	#DIV/0!			#DIV/0!	#DIV/0!
	#DIV/0!	#DIV/0!			#DIV/0!				#DIV/0!	#DIV/0!			#DIV/0!	#DIV/0!			#DIV/0!	#DIV/0!
	#DIV/0!	#DIV/0!			#DIV/0!				#DIV/0!	#DIV/0!			#DIV/0!	#DIV/0!			#DIV/0!	#DIV/0!
	#DIV/0!	#DIV/0!			#DIV/0!				#DIV/0!	#DIV/0!			#DIV/0!	#DIV/0!			#DIV/0!	#DIV/0!
	#DIV/0!	#DIV/0!			#DIV/0!				#DIV/0!	#DIV/0!			#DIV/0!	#DIV/0!			#DIV/0!	#DIV/0!
	#DIV/0!	#DIV/0!			#DIV/0!				#DIV/0!	#DIV/0!			#DIV/0!	#DIV/0!			#DIV/0!	#DIV/0!
	#DIV/0!	#DIV/0!			#DIV/0!				#DIV/0!	#DIV/0!			#DIV/0!	#DIV/0!			#DIV/0!	#DIV/0!
	#DIV/0!	#DIV/0!			#DIV/0!				#DIV/0!	#DIV/0!			#DIV/0!	#DIV/0!			#DIV/0!	#DIV/0!
	#DIV/0!	#DIV/0!			#DIV/0!				#DIV/0!	#DIV/0!			#DIV/0!	#DIV/0!			#DIV/0!	#DIV/0!
	#DIV/0!	#DIV/0!			#DIV/0!				#DIV/0!	#DIV/0!			#DIV/0!	#DIV/0!			#DIV/0!	#DIV/0!
	#DIV/0!	#DIV/0!			#DIV/0!				#DIV/0!	#DIV/0!			#DIV/0!	#DIV/0!			#DIV/0!	#DIV/0!
	#DIV/0!	#DIV/0!			#DIV/0!				#DIV/0!	#DIV/0!			#DIV/0!	#DIV/0!			#DIV/0!	#DIV/0!
	#DIV/0!	#DIV/0!			#DIV/0!				#DIV/0!	#DIV/0!			#DIV/0!	#DIV/0!			#DIV/0!	#DIV/0!
	#DIV/0!	#DIV/0!			#DIV/0!				#DIV/0!	#DIV/0!			#DIV/0!	#DIV/0!			#DIV/0!	#DIV/0!
	#DIV/0!	#DIV/0!			#DIV/0!				#DIV/0!	#DIV/0!			#DIV/0!	#DIV/0!			#DIV/0!	#DIV/0!
	#DIV/0!	#DIV/0!			#DIV/0!				#DIV/0!	#DIV/0!			#DIV/0!	#DIV/0!			#DIV/0!	#DIV/0!
	#DIV/0!	#DIV/0!			#DIV/0!				#DIV/0!	#DIV/0!			#DIV/0!	#DIV/0!			#DIV/0!	#DIV/0!
	#DIV/0!	#DIV/0!			#DIV/0!				#DIV/0!	#DIV/0!			#DIV/0!	#DIV/0!			#DIV/0!	#DIV/0!
	#DIV/0!	#DIV/0!			#DIV/0!				#DIV/0!	#DIV/0!			#DIV/0!	#DIV/0!			#DIV/0!	#DIV/0!
	#DIV/0!	#DIV/0!			#DIV/0!				#DIV/0!	#DIV/0!			#DIV/0!	#DIV/0!			#DIV/0!	#DIV/0!
	#DIV/0!	#DIV/0!			#DIV/0!				#DIV/0!	#DIV/0!			#DIV/0!	#DIV/0!			#DIV/0!	#DIV/0!
	#DIV/0!	#DIV/0!			#DIV/0!				#DIV/0!	#DIV/0!			#DIV/0!	#DIV/0!			#DIV/0!	#DIV/0!
	#DIV/0!	#DIV/0!			#DIV/0!				#DIV/0!	#DIV/0!			#DIV/0!	#DIV/0!			#DIV/0!	#DIV/0!
	#DIV/0!	#DIV/0!			#DIV/0!				#DIV/0!	#DIV/0!			#DIV/0!	#DIV/0!			#DIV/0!	#DIV/0!
	#DIV/0!	#DIV/0!			#DIV/0!				#DIV/0!	#DIV/0!			#DIV/0!	#DIV/0!			#DIV/0!	#DIV/0!
	#DIV/0!	#DIV/0!			#DIV/0!				#DIV/0!	#DIV/0!			#DIV/0!	#DIV/0!			#DIV/0!	#DIV/0!
	#DIV/0!	#DIV/0!			#DIV/0!				#DIV/0!	#DIV/0!			#DIV/0!	#DIV/0!			#DIV/0!	#DIV/0!
	#DIV/0!	#DIV/0!			#DIV/0!				#DIV/0!	#DIV/0!			#DIV/0!	#DIV/0!			#DIV/0!	#DIV/0!
	#DIV/0!	#DIV/0!			#DIV/0!				#DIV/0!	#DIV/0!			#DIV/0!	#DIV/0!			#DIV/0!	#DIV/0!
	#DIV/0!	#DIV/0!			#DIV/0!				#DIV/0!	#DIV/0!			#DIV/0!	#DIV/0!			#DIV/0!	#DIV/0!
	#DIV/0!	#DIV/0!			#DIV/0!				#DIV/0!	#DIV/0!			#DIV/0!	#DIV/0!			#DIV/0!	#DIV/0!
	#DIV/0!	#DIV/0!			#DIV/0!				#DIV/0!	#DIV/0!			#DIV/0!	#DIV/0!			#DIV/0!	#DIV/0!
	#DIV/0!	#DIV/0!			#DIV/0!				#DIV/0!	#DIV/0!			#DIV/0!	#DIV/0!			#DIV/0!	#DIV/0!
	#DIV/0!	#DIV/0!			#DIV/0!				#DIV/0!	#DIV/0!			#DIV/0!	#DIV/0!			#DIV/0!	#DIV/0!
	#DIV/0!	#DIV/0!			#DIV/0!				#DIV/0!	#DIV/0!			#DIV/0!	#DIV/0!			#DIV/0!	#DIV/0!
	#DIV/0!	#DIV/0!			#DIV/0!				#DIV/0!	#DIV/0!			#DIV/0!	#DIV/0!			#DIV/0!	#DIV/0!
	#DIV/0!	#DIV/0!			#DIV/0!				#DIV/0!	#DIV/0!			#DIV/0!	#DIV/0!			#DIV/0!	#DIV/0!
	#DIV/0!	#DIV/0!			#DIV/0!				#DIV/0!	#DIV/0!			#DIV/0!	#DIV/0!			#DIV/0!	#DIV/0!
	#DIV/0!	#DIV/0!			#DIV/0!				#DIV/0!	#DIV/0!			#DIV/0!	#DIV/0!			#DIV/0!	#DIV/0!
	#DIV/0!	#DIV/0!			#DIV/0!				#DIV/0!	#DIV/0!			#DIV/0!	#DIV/0!			#DIV/0!	#DIV/0!
	#DIV/0!	#DIV/0!			#DIV/0!				#DIV/0!	#DIV/0!			#DIV/0!	#DIV/0!			#DIV/0!	#DIV/0!
	#DIV/0!	#DIV/0!			#DIV/0!				#DIV/0!	#DIV/0!			#DIV/0!	#DIV/0!			#DIV/0!	#DIV/0!
	#DIV/0!	#DIV/0!			#DIV/0!				#DIV/0!	#DIV/0!			#DIV/0!	#DIV/0!			#DIV/0!	#DIV/0!
	#DIV/0!	#DIV/0!			#DIV/0!				#DIV/0!	#DIV/0!			#DIV/0!	#DIV/0!			#DIV/0!	#DIV/0!
	#DIV/0!	#DIV/0!			#DIV/0!				#DIV/0!	#DIV/0!			#DIV/0!	#DIV/0!			#DIV/0!	#DIV/0!
	#DIV/0!	#DIV/0!			#DIV/0!				#DIV/0!	#DIV/0!			#DIV/0!	#DIV/0!			#DIV/0!	#DIV/0!
	#DIV/0!	#DIV/0!			#DIV/0!				#DIV/0!	#DIV/0!			#DIV/0!	#DIV/0!			#DIV/0!	#DIV/0!
	#DIV/0!	#DIV/0!			#DIV/0!				#DIV/0!	#DIV/0!			#DIV/0!	#DIV/0!			#DIV/0!	#DIV/0!
	#DIV/0!	#DIV/0!			#DIV/0!				#DIV/0!	#DIV/0!			#DIV/0!	#DIV/0!			#DIV/0!	#DIV/0!
	#DIV/0!	#DIV/0!			#DIV/0!				#DIV/0!	#DIV/0!			#DIV/0!	#DIV/0!			#DIV/0!	#DIV/0!
	#DIV/0!	#DIV/0!			#DIV/0!				#DIV/0!	#DIV/0!			#DIV/0!	#DIV/0!			#DIV/0!	#DIV/0!
	#DIV/0!	#DIV/0!			#DIV/0!				#DIV/0!	#DIV/0!			#DIV/0!	#DIV/0!			#DIV/0!	#DIV/0!
	#DIV/0!	#DIV/0!			#DIV/0!				#DIV/0!	#DIV/0!			#DIV/0!	#DIV/0!			#DIV/0!	#DIV/0!
	#DIV/0!	#DIV/0!			#DIV/0!				#DIV/0!	#DIV/0!			#DIV/0!	#DIV/0!			#DIV/0!	#DIV/0!
	#DIV/0!	#DIV/0!			#DIV/0!				#DIV/0!	#DIV/0!			#DIV/0!	#DIV/0!			#DIV/0!	#DIV/0!
	#DIV/0!	#DIV/0!			#DIV/0!				#DIV/0!	#DIV/0!			#DIV/0!	#DIV/0!			#DIV/0!	#DIV/0!
	#DIV/0!	#DIV/0!			#DIV/0!				#DIV/0!	#DIV/0!			#DIV/0!	#DIV/0!			#DIV/0!	#DIV/0!
	#DIV/0!	#DIV/0!			#DIV/0!				#DIV/0!	#DIV/0!			#DIV/0!	#DIV/0!			#DIV/0!	#DIV/0!
	#DIV/0!	#DIV/0!			#DIV/0!				#DIV/0!	#DIV/0!			#DIV/0!	#DIV/0!			#DIV/0!	#DIV/0!
	#DIV/0!	#DIV/0!			#DIV/0!				#DIV/0!	#DIV/0!			#DIV/0!	#DIV/0!			#DIV/0!	#DIV/0!
	#DIV/0!	#DIV/0!			#DIV/0!				#DIV/0!	#DIV/0!			#DIV/0!	#DIV/0!			#DIV/0!	#DIV/0!
	#DIV/0!	#DIV/0!			#DIV/0!				#DIV/0!	#DIV/0!			#DIV/0!	#DIV/0!			#DIV/0!	#DIV/0!
	#DIV/0!	#DIV/0!			#DIV/0!				#DIV/0!	#DIV/0!			#DIV/0!	#DIV/0!			#DIV/0!	#DIV/0!
	#DIV/0!	#DIV/0!			#DIV/0!				#DIV/0!	#DIV/0!			#DIV/0!	#DIV/0!			#DIV/0!	#DIV/0!
	#DIV/0!	#DIV/0!			#DIV/0!				#DIV/0!	#DIV/0!			#DIV/0!	#DIV/0!			#DIV/0!	#DIV/0!
	#DIV/0!	#DIV/0!			#DIV/0!				#DIV/0!	#DIV/0!			#DIV/0!	#DIV/0!			#DIV/0!	#DIV/0!
	#DIV/0!	#DIV/0!			#DIV/0!				#DIV/0!	#DIV/0!			#DIV/0!	#DIV/0!			#DIV/0!	#DIV/0!
	#DIV/0!	#DIV/0!			#DIV/0!				#DIV/0!	#DIV/0!			#DIV/0!	#DIV/0!			#DIV/0!	#DIV/0!
	#DIV/0!	#DIV/0!			#DIV/0!				#DIV/0!	#DIV/0!			#DIV/0!	#DIV/0!			#DIV/0!	#DIV/0!
	#DIV/0!	#DIV/0!			#DIV/0!				#DIV/0!	#DIV/0!			#DIV/0!	#DIV/0!			#DIV/0!	#DIV/0!
	#DIV/0!	#DIV/0!			#DIV/0!				#DIV/0!	#DIV/0!			#DIV/0!	#DIV/0!			#DIV/0!	#DIV/0!
	#DIV/0!	#DIV/0!			#DIV/0!				#DIV/0!	#DIV/0!			#DIV/0!	#DIV/0!			#DIV/0!	#DIV/0!
	#DIV/0!	#DIV/0!			#DIV/0!				#DIV/0!	#DIV/0!			#DIV/0!	#DIV/0!			#DIV/0!	#DIV/0!
	#DIV/0!	#DIV/0!			#DIV/0!				#DIV/0!	#DIV/0!			#DIV/0!	#DIV/0!			#DIV/0!	#DIV/0!
	#DIV/0!	#DIV/0!			#DIV/0!				#DIV/0!	#DIV/0!			#DIV/0!	#DIV/0!			#DIV/0!	#DIV/0!
	#DIV/0!	#DIV/0!			#DIV/0!				#DIV/0!	#DIV/0!			#DIV/0!	#DIV/0!			#DIV/0!	#DIV/0!
	#DIV/0!	#DIV/0!			#DIV/0!				#DIV/0!	#DIV/0!			#DIV/0!	#DIV/0!			#DIV/0!	#DIV/0!
	#DIV/0!	#DIV/0!			#DIV/0!				#DIV/0!	#DIV/0!			#DIV/0!	#DIV/0!			#DIV/0!	#DIV/0!
	#DIV/0!	#DIV/0!			#DIV/0!				#DIV/0!	#DIV/0!			#DIV/0!	#DIV/0!			#DIV/0!	#DIV/0!
	#DIV/0!	#DIV/0!			#DIV/0!				#DIV/0!	#DIV/0!			#DIV/0!	#DIV/0!			#DIV/0!	#DIV/0!
	#DIV/0!	#DIV/0!			#DIV/0!				#DIV/0!	#DIV/0!			#DIV/0!	#DIV/0!			#DIV/0!	#DIV/0!
	#DIV/0!	#DIV/0!			#DIV/0!				#DIV/0!	#DIV/0!			#DIV/0!	#DIV/0!			#DIV/0!	#DIV/0!
	#DIV/0!	#DIV/0!			#DIV/0!				#DIV/0!	#DIV/0!			#DIV/0!	#DIV/0!			#DIV/0!	#DIV/0!
	#DIV/0!	#DIV/0!			#DIV/0!				#DIV/0!	#DIV/0!			#DIV/0!	#DIV/0!			#DIV/0!	#DIV/0!
	#DIV/0!	#DIV/0!			#DIV/0!				#DIV/0!	#DIV/0!			#DIV/0!	#DIV/0!			#DIV/0!	#DIV/0!
	#DIV/0!	#DIV/0!			#DIV/0!				#DIV/0!	#DIV/0!			#DIV/0!	#DIV/0!			#DIV/0!	#DIV/0!
	#DIV/0!	#DIV/0!			#DIV/0!				#DIV/0!	#DIV/0!			#DIV/0!	#DIV/0!			#DIV/0!	#DIV/0!
	#DIV/0!	#DIV/0!			#DIV/0!				#DIV/0!	#DIV/0!			#DIV/0!	#DIV/0!			#DIV/0!	#DIV/0!
	#DIV/0!	#DIV/0!			#DIV/0!				#DIV/0!	#DIV/0!			#DIV/0!	#DIV/0!			#DIV/0!	#DIV/0!
	#DIV/0!	#DIV/0!			#DIV/0!				#DIV/0!	#DIV/0!			#DIV/0!	#DIV/0!			#DIV/0!	#DIV/0!
	#DIV/0!	#DIV/0!			#DIV/0!				#DIV/0!	#DIV/0!			#DIV/0!	#DIV/0!			#DIV/0!	#DIV/0!
	#DIV/0!	#DIV/0!			#DIV/0!				#DIV/0!	#DIV/0!			#DIV/0!	#DIV/0!			#DIV/0!	#DIV/0!
	#DIV/0!	#DIV/0!			#DIV/0!				#DIV/0!	#DIV/0!			#DIV/0!	#DIV/0!			#DIV/0!	#DIV/0!
	#DIV/0!	#DIV/0!			#DIV/0!				#DIV/0!	#DIV/0!			#DIV/0!	#DIV/0!			#DIV/0!	#DIV/0!
	#DIV/0!	#DIV/0!			#DIV/0!				#DIV/0!	#DIV/0!			#DIV/0!	#DIV/0!			#DIV/0!	#DIV/0!
	#DIV/0!	#DIV/0!			#DIV/0!				#DIV/0!	#DIV/0!			#DIV/0!	#DIV/0!			#DIV/0!	#DIV/0!
	#DIV/0!	#DIV/0!			#DIV/0!				#DIV/0!	#DIV/0!			#DIV/0!	#DIV/0!			#DIV/0!	#DIV/0!
	#DIV/0!	#DIV/0!			#DIV/0!				#DIV/0!	#DIV/0!			#DIV/0!	#DIV/0!			#DIV/0!	#DIV/0!
	#DIV/0!	#DIV/0!			#DIV/0!				#DIV/0!	#DIV/0!			#DIV/0!	#DIV/0!			#DIV/0!	#DIV/0!
	#DIV/0!	#DIV/0!			#DIV/0!				#DIV/0!	#DIV/0!			#DIV/0!	#DIV/0!			#DIV/0!	#DIV/0!
	#DIV/0!	#DIV/0!			#DIV/0!				#DIV/0!	#DIV/0!			#DIV/0!	#DIV/0!			#DIV/0!	#DIV/0!
	#DIV/0!	#DIV/0!			#DIV/0!				#DIV/0!	#DIV/0!			#DIV/0!	#DIV/0!			#DIV/0!	#DIV/0!
	#DIV/0!	#DIV/0!			#DIV/0!				#DIV/0!	#DIV/0!			#DIV/0!	#DIV/0!			#DIV/0!	#DIV/0!
	#DIV/0!	#DIV/0!			#DIV/0!				#DIV/0!	#DIV/0!			#DIV/0!	#DIV/0!			#DIV/0!	#DIV/0!
	#DIV/0!	#DIV/0!			#DIV/0!				#DIV/0!	#DIV/0!			#DIV/0!	#DIV/0!			#DIV/0!	#DIV/0!
	#DIV/0!	#DIV/0!			#DIV/0!				#DIV/0!	#DIV/0!			#DIV/0!	#DIV/0!			#DIV/0!	#DIV/0!
	#DIV/0!	#DIV/0!			#DIV/0!				#DIV/0!	#DIV/0!			#DIV/0!	#DIV/0!			#DIV/0!	#DIV/0!
	#DIV/0!	#DIV/0!			#DIV/0!				#DIV/0!	#DIV/0!			#DIV/0!	#DIV/0!			#DIV/0!	#DIV/0!
	#DIV/0!	#DIV/0!			#DIV/0!				#DIV/0!	#DIV/0!			#DIV/0!	#DIV/0!			#DIV/0!	#DIV/0!
	#DIV/0!	#DIV/0!			#DIV/0!				#DIV/0!	#DIV/0!			#DIV/0!	#DIV/0!			#DIV/0!	#DIV/0!
	#DIV/0!	#DIV/0!			#DIV/0!				#DIV/0!	#DIV/0!			#DIV/0!	#DIV/0!			#DIV/0!	#DIV/0!
	#DIV/0!	#DIV/0!			#DIV/0!				#DIV/0!	#DIV/0!			#DIV/0!	#DIV/0!			#DIV/0!	#DIV/0!
	#DIV/0!	#DIV/0!			#DIV/0!				#DIV/0!	#DIV/0!			#DIV/0!	#DIV/0!			#DIV/0!	#DIV/0!
	#DIV/0!	#DIV/0!			#DIV/0!				#DIV/0!	#DIV/0!			#DIV/0!	#DIV/0!			#DIV/0!	#DIV/0!
	#DIV/0!	#DIV/0!			#DIV/0!				#DIV/0!	#DIV/0!			#DIV/0!	#DIV/0!			#DIV/0!	#DIV/0!
	#DIV/0!	#DIV/0!			#DIV/0!				#DIV/0!	#DIV/0!			#DIV/0!	#DIV/0!			#DIV/0!	#DIV/0!
	#DIV/0!	#DIV/0!			#DIV/0!				#DIV/0!	#DIV/0!			#DIV/0!	#DIV/0!			#DIV/0!	#DIV/0!
	#DIV/0!	#DIV/0!			#DIV/0!				#DIV/0!	#DIV/0!			#DIV/0!	#DIV/0!			#DIV/0!	#DIV/0!
	#DIV/0!	#DIV/0!			#DIV/0!				#DIV/0!	#DIV/0!			#DIV/0!	#DIV/0!			#DIV/0!	#DIV/0!
	#DIV/0!	#DIV/0!			#DIV/0!				#DIV/0!	#DIV/0!			#DIV/0!	#DIV/0!			#DIV/0!	#DIV/0!
	#DIV/0!	#DIV/0!			#DIV/0!				#DIV/0!	#DIV/0!			#DIV/0!	#DIV/0!			#DIV/0!	#DIV/0!
	#DIV/0!	#DIV/0!			#DIV/0!				#DIV/0!	#DIV/0!			#DIV/0!	#DIV/0!			#DIV/0!	#DIV/0!
	#DIV/0!	#DIV/0!			#DIV/0!				#DIV/0!	#DIV/0!			#DIV/0!	#DIV/0!			#DIV/0!	#DIV/0!
	#DIV/0!	#DIV/0!			#DIV/0!				#DIV/0!	#DIV/0!			#DIV/0!	#DIV/0!			#DIV/0!	#DIV/0!
	#DIV/0!	#DIV/0!			#DIV/0!				#DIV/0!	#DIV/0!			#DIV/0!	#DIV/0!			#DIV/0!	#DIV/0!
	#DIV/0!	#DIV/0!			#DIV/0!				#DIV/0!	#DIV/0!			#DIV/0!	#DIV/0!			#DIV/0!	#DIV/0!
	#DIV/0!	#DIV/0!			#DIV/0!				#DIV/0!	#DIV/0!			#DIV/0!	#DIV/0!			#DIV/0!	#DIV/0!
	#DIV/0!	#DIV/0!			#DIV/0!				#DIV/0!	#DIV/0!			#DIV/0!	#DIV/0!			#DIV/0!	#DIV/0!
	#DIV/0!	#DIV/0!			#DIV/0!				#DIV/0!	#DIV/0!			#DIV/0!	#DIV/0!			#DIV/0!	#DIV/0!
	#DIV/0!	#DIV/0!			#DIV/0!				#DIV/0!	#DIV/0!			#DIV/0!	#DIV/0!			#DIV/0!	#DIV/0!
	#DIV/0!	#DIV/0!			#DIV/0!				#DIV/0!	#DIV/0!			#DIV/0!	#DIV/0!			#DIV/0!	#DIV/0!
	#DIV/0!	#DIV/0!			#DIV/0!				#DIV/0!	#DIV/0!			#DIV/0!	#DIV/0!			#DIV/0!	#DIV/0!
	#DIV/0!	#DIV/0!			#DIV/0!				#DIV/0!	#DIV/0!			#DIV/0!	#DIV/0!			#DIV/0!	#DIV/0!
	#DIV/0!	#DIV/0!			#DIV/0!				#DIV/0!	#DIV/0!			#DIV/0!	#DIV/0!			#DIV/0!	#DIV/0!
	#DIV/0!	#DIV/0!			#DIV/0!				#DIV/0!	#DIV/0!			#DIV/0!	#DIV/0!			#DIV/0!	#DIV/0!
	#DIV/0!	#DIV/0!			#DIV/0!				#DIV/0!	#DIV/0!			#DIV/0!	#DIV/0!			#DIV/0!	#DIV/0!
	#DIV/0!	#DIV/0!			#DIV/0!				#DIV/0!	#DIV/0!			#DIV/0!	#DIV/0!			#DIV/0!	#DIV/0!
	#DIV/0!	#DIV/0!			#DIV/0!				#DIV/0!	#DIV/0!			#DIV/0!	#DIV/0!			#DIV/0!	#DIV/0!
	#DIV/0!	#DIV/0!			#DIV/0!				#DIV/0!	#DIV/0!			#DIV/0!	#DIV/0!			#DIV/0!	#DIV/0!
	#DIV/0!	#DIV/0!			#DIV/0!				#DIV/0!	#DIV/0!			#DIV/0!	#DIV/0!			#DIV/0!	#DIV/0!
	#DIV/0!	#DIV/0!			#DIV/0!				#DIV/0!	#DIV/0!			#DIV/0!	#DIV/0!			#DIV/0!	#DIV/0!
	#DIV/0!	#DIV/0!			#DIV/0!				#DIV/0!	#DIV/0!			#DIV/0!	#DIV/0!			#DIV/0!	#DIV/0!
	#DIV/0!	#DIV/0!			#DIV/0!				#DIV/0!	#DIV/0!			#DIV/0!	#DIV/0!			#DIV/0!	#DIV/0!
	#DIV/0!	#DIV/0!			#DIV/0!				#DIV/0!	#DIV/0!			#DIV/0!	#DIV/0!			#DIV/0!	#DIV/0!
	#DIV/0!	#DIV/0!			#DIV/0!				#DIV/0!	#DIV/0!			#DIV/0!	#DIV/0!			#DIV/0!	#DIV/0!
	#DIV/0!	#DIV/0!			#DIV/0!				#DIV/0!	#DIV/0!			#DIV/0!	#DIV/0!			#DIV/0!	#DIV/0!
	#DIV/0!	#DIV/0!			#DIV/0!				#DIV/0!	#DIV/0!			#DIV/0!	#DIV/0!			#DIV/0!	#DIV/0!
	#DIV/0!	#DIV/0!			#DIV/0!				#DIV/0!	#DIV/0!			#DIV/0!	#DIV/0!			#DIV/0!	#DIV/0!
	#DIV/0!	#DIV/0!			#DIV/0!				#DIV/0!	#DIV/0!			#DIV/0!	#DIV/0!			#DIV/0!	#DIV/0!
	#DIV/0!	#DIV/0!			#DIV/0!				#DIV/0!	#DIV/0!			#DIV/0!	#DIV/0!			#DIV/0!	#DIV/0!
	#DIV/0!	#DIV/0!			#DIV/0!				#DIV/0!	#DIV/0!			#DIV/0!	#DIV/0!			#DIV/0!	#DIV/0!
	#DIV/0!	#DIV/0!			#DIV/0!				#DIV/0!	#DIV/0!			#DIV/0!	#DIV/0!			#DIV/0!	#DIV/0!
	#DIV/0!	#DIV/0!			#DIV/0!				#DIV/0!	#DIV/0!			#DIV/0!	#DIV/0!			#DIV/0!	#DIV/0!
	#DIV/0!	#DIV/0!			#DIV/0!				#DIV/0!	#DIV/0!			#DIV/0!	#DIV/0!			#DIV/0!	#DIV/0!
	#DIV/0!	#DIV/0!			#DIV/0!				#DIV/0!	#DIV/0!			#DIV/0!	#DIV/0!			#DIV/0!	#DIV/0!
	#DIV/0!	#DIV/0!			#DIV/0!				#DIV/0!	#DIV/0!			#DIV/0!	#DIV/0!			#DIV/0!	#DIV/0!
	#DIV/0!	#DIV/0!			#DIV/0!				#DIV/0!	#DIV/0!			#DIV/0!	#DIV/0!			#DIV/0!	#DIV/0!
	#DIV/0!	#DIV/0!			#DIV/0!				#DIV/0!	#DIV/0!			#DIV/0!	#DIV/0!			#DIV/0!	#DIV/0!
	#DIV/0!	#DIV/0!			#DIV/0!				#DIV/0!	#DIV/0!			#DIV/0!	#DIV/0!			#DIV/0!	#DIV/0!
	#DIV/0!	#DIV/0!			#DIV/0!				#DIV/0!	#DIV/0!			#DIV/0!	#DIV/0!			#DIV/0!	#DIV/0!
	#DIV/0!	#DIV/0!			#DIV/0!				#DIV/0!	#DIV/0!			#DIV/0!	#DIV/0!			#DIV/0!	#DIV/0!
	#DIV/0!	#DIV/0!			#DIV/0!				#DIV/0!	#DIV/0!			#DIV/0!	#DIV/0!			#DIV/0!	#DIV/0!
	#DIV/0!	#DIV/0!			#DIV/0!				#DIV/0!	#DIV/0!			#DIV/0!	#DIV/0!			#DIV/0!	#DIV/0!
	#DIV/0!	#DIV/0!			#DIV/0!				#DIV/0!	#DIV/0!			#DIV/0!	#DIV/0!			#DIV/0!	#DIV/0!
	#DIV/0!	#DIV/0!			#DIV/0!				#DIV/0!	#DIV/0!			#DIV/0!	#DIV/0!			#DIV/0!	#DIV/0!
	#DIV/0!	#DIV/0!			#DIV/0!				#DIV/0!	#DIV/0!			#DIV/0!	#DIV/0!			#DIV/0!	#DIV/0!
	#DIV/0!	#DIV/0!			#DIV/0!				#DIV/0!	#DIV/0!			#DIV/0!	#DIV/0!			#DIV/0!	#DIV/0!
	#DIV/0!	#DIV/0!			#DIV/0!				#DIV/0!	#DIV/0!			#DIV/0!	#DIV/0!			#DIV/0!	#DIV/0!
	#DIV/0!	#DIV/0!			#DIV/0!				#DIV/0!	#DIV/0!			#DIV/0!	#DIV/0!			#DIV/0!	#DIV/0!
	#DIV/0!	#DIV/0!			#DIV/0!				#DIV/0!	#DIV/0!			#DIV/0!	#DIV/0!			#DIV/0!	#DIV/0!
	#DIV/0!	#DIV/0!			#DIV/0!				#DIV/0!	#DIV/0!			#DIV/0!	#DIV/0!			#DIV/0!	#DIV/0!
	#DIV/0!	#DIV/0!			#DIV/0!				#DIV/0!	#DIV/0!			#DIV/0!	#DIV/0!			#DIV/0!	#DIV/0!
	#DIV/0!	#DIV/0!			#DIV/0!				#DIV/0!	#DIV/0!			#DIV/0!	#DIV/0!			#DIV/0!	#DIV/0!
	#DIV/0!	#DIV/0!			#DIV/0!				#DIV/0!	#DIV/0!			#DIV/0!	#DIV/0!			#DIV/0!	#DIV/0!
	#DIV/0!	#DIV/0!			#DIV/0!				#DIV/0!	#DIV/0!			#DIV/0!	#DIV/0!			#DIV/0!	#DIV/0!
	#DIV/0!	#DIV/0!			#DIV/0!				#DIV/0!	#DIV/0!			#DIV/0!	#DIV/0!			#DIV/0!	#DIV/0!
	#DIV/0!	#DIV/0!			#DIV/0!				#DIV/0!	#DIV/0!			#DIV/0!	#DIV/0!			#DIV/0!	#DIV/0!
	#DIV/0!	#DIV/0!			#DIV/0!				#DIV/0!	#DIV/0!			#DIV/0!	#DIV/0!			#DIV/0!	#DIV/0!
	#DIV/0!	#DIV/0!			#DIV/0!				#DIV/0!	#DIV/0!			#DIV/0!	#DIV/0!			#DIV/0!	#DIV/0!

## Sheet: Figure 2D
	Empty Liposomes with NBD-PS				SERINC3 Liposomes (1.5) with NBD-PS
Time (s)	exp-1	exp-2	exp-3		Time (s)	exp-1	exp-2	exp-3
0	1.01577	1.01815	1.00988		0	1.01295	1.01232	1.00948
1	1.01557	1.01845	1.00611		1	1.01089	1.01656	1.00884
2	1.01466	1.01948	1.00671		2	1.00979	1.0167	1.00951
3	1.01449	1.0205	1.00773		3	1.01395	1.00829	1.00772
4	1.01096	1.01579	1.00909		4	1.01004	1.01191	1.00854
5	1.01154	1.01832	1.00707		5	1.00902	1.00936	1.0087
6	1.01237	1.01817	1.00473		6	1.00999	1.01436	1.00848
7	1.01268	1.01622	1.00498		7	1.00904	1.01872	1.0088
8	1.01285	1.01519	1.00813		8	1.01491	1.00971	1.00705
9	1.01215	1.01891	1.00649		9	1.01227	1.01303	1.00743
10	1.01251	1.01705	1.00732		10	1.0111	1.01646	1.00502
11	1.01269	1.01454	1.00596		11	1.01187	1.00958	1.00355
12	1.0118	1.01626	1.0051		12	1.01212	1.01011	1.00488
13	1.01246	1.01677	1.00528		13	1.01066	1.01217	1.00572
14	1.00951	1.0141	1.00515		14	1.00774	1.01502	1.0053
15	1.00986	1.01059	1.00501		15	1.01211	1.01439	1.00413
16	1.00832	1.01335	1.00629		16	1.00903	1.01162	1.00387
17	1.00688	1.01222	1.00564		17	1.00957	1.01226	1.00483
18	1.01127	1.01591	1.0065		18	1.00981	1.00987	1.00337
19	1.00914	1.01031	1.00505		19	1.00908	1.01285	1.0046
20	1.00666	1.01245	1.00552		20	1.01137	1.01053	1.00291
21	1.00415	1.01005	1.00545		21	1.00681	1.00962	1.00271
22	1.00764	1.0113	1.00491		22	1.00756	1.01111	1.00373
23	1.00646	1.01383	1.00529		23	1.00533	1.00656	1.00282
24	1.00947	1.01191	1.00477		24	1.00533	1.0121	1.00407
25	1.0089	1.00938	1.004		25	1.01078	1.01089	1.0046
26	1.00867	1.01015	1.00544		26	1.00778	1.01249	1.00167
27	1.00698	1.01047	1.00513		27	1.00696	1.01253	1.00183
28	1.00591	1.00651	1.00414		28	1.00758	1.01051	1.00335
29	1.00753	1.00686	1.00408		29	1.00832	1.01032	1.00216
30	1.00698	1.01016	1.00433		30	1.00418	1.01251	1.00099
31	1.00596	1.00981	1.00403		31	1.00164	1.00627	0.999881
32	1.00663	1.00968	1.0042		32	1.00992	1.00691	1.00101
33	1.00615	1.00755	1.00424		33	1.00631	1.00692	1.00223
34	1.00472	1.00724	1.00527		34	1.00642	1.00624	1.00083
35	1.00687	1.00943	1.00388		35	1.00862	1.00649	1.00078
36	1.0064	1.01088	1.00383		36	1.00675	1.00508	1.00118
37	1.00676	1.00719	1.00287		37	1.00586	1.00965	1.00169
38	1.00632	1.00921	1.00425		38	1.00916	1.01285	1.0018
39	1.00461	1.00844	1.00543		39	1.00406	1.01069	1.00039
40	1.00309	1.00843	1.00225		40	1.0016	1.00516	1.00072
41	1.00501	1.00612	1.00203		41	1.00307	1.00953	1.00084
42	1.00489	1.00338	1.00524		42	1.00389	1.00677	1.00106
43	1.00714	1.00514	1.00266		43	1.00704	1.00611	1.00128
44	1.00269	1.00864	1.0035		44	1.00909	1.00747	1.0008
45	1.00259	1.00658	1.00107		45	1.00771	1.00529	1.00144
46	1.00629	1.00419	1.00341		46	1.00584	1.0081	0.99952
47	1.01136	1.00502	1.00159		47	1.00325	1.00712	1.00068
48	1.00492	1.00777	1.00236		48	1.00488	1.00943	1.00091
49	1.00477	1.00642	1.00319		49	1.00658	1.0043	1.00219
50	1.00433	1.00439	1.00009		50	1.00295	1.00826	1.00445
51	1.00458	1.00438	1.00283		51	1.00171	1.00618	1.00374
52	1.00377	1.00599	1.00193		52	1.00444	1.00794	1.0013
53	1.0037	1.00572	1.00356		53	1.00564	1.00601	1.00334
54	1.00192	1.00514	1.0023		54	1.00717	1.00103	1.00449
55	1.00428	1.00468	1.0017		55	1.00433	1.00324	1.00185
56	1.00391	1.00374	1.00061		56	1.00317	1.00798	1.00209
57	1.00662	1.00277	1.00193		57	1.00089	1.00696	1.00265
58	1.00281	1.00243	1.0017		58	1.00389	1.00693	0.999787
59	1.00156	1.00487	1.00198		59	1.00375	1.00717	1.00016
60	1.00145	1.00599	1.00177		60	1.00338	1.00526	1.0017
61	1.00142	1.00041	1.00105		61	1.00357	1.01297	1.00159
62	0.999301	1.00616	1.00449		62	0.999747	1.00611	1.00069
63	1.00096	1.00454	1.00059		63	1.00226	1.00313	1.00256
64	1.00077	1.0087	1.00063		64	1.00369	1.00151	1.00007
65	1.00414	1.00371	0.999904		65	0.999924	1.00002	1.00233
66	0.999813	1.00214	1.00048		66	1.00202	1.00015	1.00129
67	0.999359	1.00341	1.00106		67	1.00154	1.00529	1.00027
68	1.0019	1.00367	1.00136		68	1.00325	1.00438	0.999484
69	1.00099	1.00384	1.00021		69	1.00361	1.0063	1.00205
70	1.00139	1.00254	0.999779		70	1.00284	1.00523	1.00088
71	0.999826	0.998332	0.999865		71	1.0001	1.00339	1.00147
72	1.00022	1.00028	1.00087		72	1.00203	1.00176	0.998195
73	1.00287	1.00168	1.00049		73	1.00205	1.00352	1.00018
74	1.00364	1.00143	0.999243		74	1.00295	1.00492	0.999559
75	1.00174	1.00208	1.0012		75	1.00101	1.0033	1.0016
76	0.999791	1.00351	1.00082		76	1.00067	1.00277	0.99971
77	1.00193	1.00348	1.00029		77	0.998624	1.00467	0.997332
78	0.999468	1.00474	0.998435		78	1.00116	1.00074	1.00087
79	0.997937	1.00009	1.00005		79	1.00175	1.00477	1.00074
80	0.999361	1.00093	0.999337		80	1.00078	1.00115	1.00036
81	1.00185	1.00196	0.999814		81	1.00131	0.996963	1.00038
82	1.00343	0.997845	1.00038		82	1.00094	1.00141	0.999941
83	0.997354	0.999859	1.00081		83	0.997657	1.00031	0.998255
84	0.999683	0.999921	1.00058		84	1.00145	0.999668	1.00055
85	0.998325	0.999488	0.999078		85	0.997865	1.0005	1.00052
86	0.999577	1.00148	0.999571		86	0.996999	1.00425	0.996438
87	0.998431	0.999164	0.999914		87	1.00203	0.999446	0.998767
88	0.998985	0.996642	1.00083		88	1.00063	1.00123	0.996723
89	0.996878	0.998305	1.00055		89	0.998356	0.999939	1.00174
90	0.998619	0.997436	0.998514		90	0.997872	1.00198	0.998966
91	0.999377	0.995797	0.99792		91	1.00137	1.00056	0.999763
92	1.0005	0.999003	0.998286		92	0.999276	1.00586	0.997741
93	1.0012	1.00224	1.00043		93	0.997795	1.00964	0.997826
94	1.00041	1.00024	0.997547		94	1.00018	1.00267	0.998877
95	0.999844	1.0327	0.99969		95	1.00047	1.00248	0.996782
96	1.00343	1.06588	1.01424		96	1.01369	1.03934	1.00792
97	1.01885	0.998772	1.01081		97	1.02368	1.08558	1.02739
98	0.991218	0.867013	0.958053		98	0.970669	0.982973	0.992595
99	0.979815	0.761912	0.912206		99	0.958369	0.885841	0.953506
100	0.950802	0.718124	0.86357		100	0.90624	0.733617	0.877952
101	0.934449	0.692873	0.832655		101	0.869304	0.688171	0.838574
102	0.917189	0.669389	0.804273		102	0.842184	0.640511	0.803093
103	0.911705	0.648611	0.785409		103	0.812967	0.607971	0.767322
104	0.904531	0.634016	0.765597		104	0.789272	0.579688	0.735977
105	0.896674	0.619475	0.751542		105	0.761541	0.55582	0.705525
106	0.884667	0.605459	0.737191		106	0.738767	0.535927	0.682139
107	0.878096	0.591445	0.724435		107	0.720568	0.511925	0.656315
108	0.868727	0.579805	0.71279		108	0.696552	0.492345	0.635835
109	0.863449	0.572043	0.703655		109	0.676791	0.478877	0.616188
110	0.85274	0.559535	0.6939		110	0.664148	0.46133	0.599797
111	0.84846	0.550517	0.682711		111	0.645302	0.448527	0.581657
112	0.843778	0.542044	0.674467		112	0.625134	0.431884	0.564369
113	0.834106	0.534214	0.668752		113	0.612122	0.424961	0.550884
114	0.829343	0.528951	0.661627		114	0.594816	0.414147	0.534904
115	0.825009	0.518696	0.655871		115	0.582901	0.398197	0.521959
116	0.818182	0.514741	0.64807		116	0.569176	0.393489	0.509882
117	0.814181	0.509689	0.644236		117	0.555038	0.381895	0.498153
118	0.808613	0.502929	0.63855		118	0.542753	0.37355	0.48719
119	0.807703	0.499744	0.633578		119	0.531579	0.364988	0.477989
120	0.799143	0.495361	0.628243		120	0.520796	0.357969	0.469397
121	0.793984	0.487549	0.625538		121	0.507938	0.34661	0.461982
122	0.792649	0.48568	0.621454		122	0.496379	0.341033	0.450585
123	0.785438	0.482145	0.616915		123	0.488884	0.333602	0.444687
124	0.784512	0.478071	0.614435		124	0.479801	0.32958	0.436139
125	0.782882	0.473253	0.610494		125	0.469201	0.32346	0.429127
126	0.780794	0.473411	0.606584		126	0.462578	0.316337	0.420457
127	0.774024	0.469887	0.60554		127	0.454282	0.314483	0.415235
128	0.772958	0.471909	0.601566		128	0.446561	0.307974	0.408268
129	0.766196	0.466921	0.600177		129	0.44132	0.305946	0.402537
130	0.768511	0.463884	0.596146		130	0.429804	0.300849	0.396424
131	0.763305	0.461134	0.594556		131	0.423922	0.297622	0.391214
132	0.760922	0.459699	0.591789		132	0.416077	0.29574	0.385664
133	0.760153	0.457341	0.590771		133	0.411738	0.289637	0.379655
134	0.758107	0.456253	0.588058		134	0.404934	0.288154	0.376024
135	0.754462	0.454563	0.587842		135	0.398349	0.283571	0.372323
136	0.751091	0.452732	0.585402		136	0.394009	0.281571	0.367618
137	0.750309	0.453952	0.584685		137	0.388343	0.278498	0.364224
138	0.74907	0.451253	0.581499		138	0.383372	0.276746	0.359419
139	0.747428	0.448693	0.579415		139	0.37922	0.274754	0.355989
140	0.746088	0.449392	0.578219		140	0.373035	0.272638	0.3503
141	0.743845	0.446406	0.57699		141	0.366263	0.270637	0.3474
142	0.737646	0.445503	0.57467		142	0.364347	0.267985	0.344533
143	0.74088	0.445287	0.57409		143	0.360683	0.270141	0.340946
144	0.740681	0.443618	0.573302		144	0.357224	0.263906	0.336846
145	0.737844	0.446825	0.573035		145	0.352546	0.262197	0.335902
146	0.7378	0.443793	0.571186		146	0.346824	0.260472	0.332289
147	0.732809	0.44203	0.569639		147	0.343185	0.260207	0.329151
148	0.734786	0.440543	0.568589		148	0.340454	0.261876	0.326622
149	0.730798	0.440686	0.567979		149	0.338258	0.25604	0.323964
150	0.731352	0.439373	0.565993		150	0.335151	0.25475	0.322121
151	0.729874	0.438944	0.566285		151	0.330413	0.254778	0.319426
152	0.728098	0.435676	0.564854		152	0.328139	0.254057	0.316884
153	0.726319	0.437199	0.56408		153	0.32275	0.252516	0.314725
154	0.726172	0.438793	0.563445		154	0.321798	0.250235	0.311739
155	0.725495	0.437	0.561442		155	0.317723	0.248255	0.310711
156	0.723937	0.43565	0.560917		156	0.315479	0.247303	0.307932
157	0.723129	0.434383	0.561915		157	0.312471	0.246009	0.305471
158	0.72008	0.432114	0.558976		158	0.31072	0.246495	0.30349
159	0.718093	0.439427	0.559607		159	0.3087	0.243785	0.301086
160	0.716923	0.433777	0.55859		160	0.304644	0.241566	0.300181
161	0.721709	0.434636	0.558805		161	0.304124	0.242243	0.297928
162	0.718226	0.432509	0.557467		162	0.300273	0.240769	0.296579
163	0.71734	0.431466	0.556548		163	0.297614	0.23947	0.293535
164	0.714399	0.430191	0.555986		164	0.295576	0.238761	0.292565
165	0.715233	0.433241	0.555792		165	0.291908	0.238899	0.290339
166	0.715064	0.429494	0.554436		166	0.292376	0.235936	0.28807
167	0.717237	0.428598	0.554008		167	0.290039	0.235834	0.286812
168	0.713625	0.429504	0.554038		168	0.287716	0.237505	0.285324
169	0.710095	0.42933	0.552667		169	0.285333	0.233422	0.283468
170	0.71131	0.428626	0.553136		170	0.282716	0.234757	0.283936
171	0.708731	0.427542	0.552194		171	0.28119	0.233363	0.281676
172	0.70968	0.429283	0.551836		172	0.279501	0.230937	0.28065
173	0.710651	0.432082	0.5515		173	0.279998	0.231921	0.27897
174	0.709292	0.425289	0.549776		174	0.276644	0.231211	0.278259
175	0.708303	0.426903	0.550089		175	0.276558	0.229314	0.276785
176	0.708098	0.428048	0.550069		176	0.273344	0.227621	0.274644
177	0.707239	0.428515	0.549063		177	0.271912	0.228668	0.273821
178	0.707176	0.427528	0.548906		178	0.270998	0.228678	0.272411
179	0.705169	0.42624	0.548976		179	0.269988	0.227638	0.270898
180	0.707313	0.427118	0.5488		180	0.267442	0.225323	0.269916
181	0.705303	0.427831	0.547366		181	0.26571	0.22468	0.268475
182	0.70404	0.424601	0.54845		182	0.264091	0.224815	0.266929
183	0.702739	0.42293	0.547443		183	0.263532	0.224207	0.266141
184	0.703118	0.42597	0.546501		184	0.2615	0.224957	0.266269
185	0.702142	0.425232	0.545293		185	0.261514	0.223387	0.264546
186	0.70221	0.422183	0.545602		186	0.259572	0.222282	0.263576
187	0.700855	0.42364	0.545458		187	0.257207	0.221573	0.263382
188	0.700651	0.422769	0.546055		188	0.256405	0.221432	0.261749
189	0.700403	0.424822	0.54578		189	0.256094	0.220685	0.259874
190	0.700622	0.424657	0.544561		190	0.254292	0.219986	0.259824
191	0.699596	0.424449	0.543852		191	0.253079	0.219266	0.258403
192	0.698867	0.421824	0.545309		192	0.25135	0.220776	0.256768
193	0.698733	0.421712	0.543616		193	0.250303	0.218011	0.255504
194	0.699066	0.419002	0.543017		194	0.249672	0.217626	0.254701
195	0.697486	0.420644	0.544362		195	0.248821	0.21658	0.254274
196	0.697488	0.419873	0.54287		196	0.247377	0.217302	0.254521
197	0.697533	0.420851	0.542477		197	0.245731	0.217885	0.253256
198	0.697891	0.419288	0.542751		198	0.244202	0.215222	0.251764
199	0.694822	0.419751	0.542002		199	0.243311	0.216947	0.251512
200	0.695785	0.420083	0.541445		200	0.242572	0.214397	0.249832
201	0.698182	0.419343	0.541355		201	0.241955	0.214723	0.24904
202	0.693847	0.419058	0.541228		202	0.240582	0.21518	0.248984
203	0.697064	0.419565	0.540754		203	0.239603	0.21394	0.248019
204	0.694278	0.419537	0.541733		204	0.238696	0.213017	0.246861
205	0.694351	0.419402	0.54104		205	0.239019	0.213546	0.245728
206	0.692468	0.417735	0.540972		206	0.236723	0.212573	0.244721
207	0.69207	0.415815	0.540856		207	0.236244	0.212432	0.244932
208	0.69107	0.417071	0.539912		208	0.235436	0.21027	0.243983
209	0.6941	0.418576	0.53926		209	0.235009	0.209689	0.242792
210	0.691107	0.416437	0.538229		210	0.233747	0.210081	0.242011
211	0.690814	0.416291	0.540553		211	0.23229	0.209119	0.241355
212	0.690633	0.414256	0.539658		212	0.23163	0.207094	0.2415
213	0.687696	0.415729	0.538142		213	0.230908	0.20835	0.240632
214	0.688085	0.414771	0.538006		214	0.22978	0.207487	0.240339
215	0.692266	0.414926	0.538388		215	0.22793	0.206252	0.238301
216	0.689592	0.414614	0.536789		216	0.22862	0.206468	0.237501
217	0.689434	0.414907	0.537021		217	0.227613	0.206862	0.236931
218	0.689998	0.415294	0.536362		218	0.227016	0.206501	0.235818
219	0.690833	0.413208	0.537801		219	0.22576	0.206603	0.235632
220	0.687872	0.413772	0.536388		220	0.224793	0.204736	0.234892
221	0.687505	0.413681	0.536		221	0.224048	0.203443	0.234348
222	0.687028	0.413519	0.535814		222	0.222579	0.205709	0.233919
223	0.685012	0.412829	0.536086		223	0.222896	0.205648	0.233188
224	0.685022	0.412908	0.536536		224	0.221866	0.204123	0.232092
225	0.685433	0.411742	0.536437		225	0.221745	0.20347	0.231918
226	0.686744	0.410709	0.536413		226	0.21947	0.203344	0.231284
227	0.686736	0.412028	0.53588		227	0.219937	0.203517	0.23
228	0.686424	0.411904	0.535376		228	0.220048	0.204193	0.230594
229	0.686569	0.411353	0.534442		229	0.21744	0.202769	0.230237
230	0.684149	0.410329	0.535675		230	0.218153	0.202651	0.228328
231	0.685736	0.411098	0.535001		231	0.217907	0.202061	0.228283
232	0.68545	0.410338	0.535772		232	0.217178	0.200945	0.228145
233	0.687268	0.410794	0.533897		233	0.216053	0.19923	0.226381
234	0.683513	0.411346	0.535305		234	0.212975	0.199166	0.22605
235	0.683676	0.41146	0.533265		235	0.213297	0.199482	0.225177
236	0.682915	0.408264	0.533307		236	0.213144	0.199589	0.224771
237	0.682895	0.406689	0.53288		237	0.212709	0.200052	0.224344
238	0.684303	0.408405	0.533511		238	0.212595	0.199554	0.2245
239	0.684297	0.407092	0.532346		239	0.211298	0.197967	0.22298
240	0.681642	0.408244	0.533629		240	0.210776	0.199184	0.222571
241	0.681234	0.407029	0.533806		241	0.207792	0.197381	0.22288
242	0.68149	0.40805	0.532003		242	0.209435	0.198446	0.223188
243	0.68181	0.406425	0.532816		243	0.208853	0.198216	0.221738
244	0.681655	0.40789	0.532872		244	0.208397	0.197219	0.220718
245	0.679532	0.407882	0.53311		245	0.20837	0.196896	0.220237
246	0.679593	0.408542	0.532785		246	0.20727	0.196049	0.220038
247	0.680773	0.406624	0.533124		247	0.207186	0.195538	0.219849
248	0.679773	0.408692	0.531435		248	0.204653	0.196513	0.219194
249	0.677533	0.40639	0.531097		249	0.206038	0.196466	0.218436
250	0.68024	0.405458	0.531537		250	0.203945	0.199419	0.218287
251	0.679821	0.408179	0.530804		251	0.203732	0.194254	0.217919
252	0.680913	0.405097	0.531364		252	0.203414	0.194946	0.21675
253	0.682366	0.408154	0.531		253	0.202316	0.194981	0.216823
254	0.680064	0.404278	0.531061		254	0.200817	0.194251	0.215815
255	0.677177	0.403757	0.530847		255	0.201027	0.193306	0.215491
256	0.678798	0.406372	0.530923		256	0.200699	0.193906	0.21479
257	0.679427	0.407011	0.53112		257	0.200722	0.19323	0.214148
258	0.677921	0.405043	0.530935		258	0.199337	0.193376	0.214073
259	0.679386	0.404845	0.52962		259	0.200425	0.193564	0.213196
260	0.678809	0.404369	0.530068		260	0.198999	0.192667	0.212837
261	0.677585	0.403408	0.529308		261	0.198556	0.192818	0.211944
262	0.677632	0.403482	0.529644		262	0.197285	0.191657	0.212516
263	0.675276	0.402336	0.528776		263	0.197401	0.190437	0.211532
264	0.675578	0.402821	0.529533		264	0.19481	0.191214	0.210712
265	0.675249	0.404825	0.530068		265	0.196493	0.190261	0.211165
266	0.67395	0.403673	0.529283		266	0.196336	0.189835	0.21048
267	0.676221	0.403089	0.52942		267	0.195474	0.190042	0.210353
268	0.675119	0.402187	0.528682		268	0.194371	0.190717	0.209719
269	0.674205	0.40048	0.529072		269	0.194795	0.190785	0.208963
270	0.676879	0.401698	0.528423		270	0.193727	0.189548	0.209018
271	0.67601	0.400985	0.528558		271	0.192244	0.191184	0.208432
272	0.675895	0.403186	0.528253		272	0.192891	0.188381	0.207699
273	0.674726	0.401296	0.527632		273	0.191565	0.188521	0.207637
274	0.671709	0.402091	0.527963		274	0.191089	0.188347	0.208092
275	0.673086	0.403497	0.528317		275	0.191054	0.18866	0.206958
276	0.673002	0.399834	0.527892		276	0.190594	0.187296	0.206697
277	0.675329	0.399991	0.527367		277	0.190849	0.188692	0.205923
278	0.672252	0.400772	0.528119		278	0.189831	0.188057	0.205764
279	0.673424	0.400903	0.527874		279	0.188578	0.190154	0.205085
280	0.674343	0.39928	0.52693		280	0.188558	0.186091	0.204814
281	0.673471	0.399075	0.526536		281	0.187881	0.187626	0.204641
282	0.672805	0.400264	0.52766		282	0.187632	0.187647	0.204193
283	0.675596	0.398756	0.526975		283	0.187967	0.187371	0.203548
284	0.673224	0.400045	0.52712		284	0.185784	0.186138	0.202794
285	0.67082	0.397076	0.526861		285	0.187117	0.185501	0.202325
286	0.67116	0.399478	0.527996		286	0.187261	0.185827	0.202777
287	0.672181	0.398198	0.526497		287	0.18521	0.184578	0.201859
288	0.671764	0.397519	0.525392		288	0.184607	0.184505	0.201081
289	0.673093	0.398892	0.525642		289	0.183806	0.185707	0.20149
290	0.671646	0.398438	0.526253		290	0.183925	0.184652	0.20167
291	0.668035	0.40072	0.526277		291	0.184056	0.1836	0.200945
292	0.669207	0.397571	0.525521		292	0.184144	0.183342	0.200215
293	0.671463	0.397221	0.526394		293	0.183534	0.184589	0.200257
294	0.670172	0.396932	0.525907		294	0.182554	0.18496	0.199775
295	0.670089	0.395003	0.525476		295	0.182081	0.182801	0.199442
296	0.669736	0.395978	0.523885		296	0.181612	0.183592	0.198903
297	0.669368	0.39685	0.526181		297	0.182129	0.182603	0.199082
298	0.669792	0.397669	0.523833		298	0.18115	0.183249	0.197577
299	0.669893	0.398252	0.524975		299	0.180453	0.184433	0.197441
300	0.67054	0.398662	0.524793		300	0.180549	0.183171	0.197801
301	0.667894	0.397471	0.524874		301	0.179283	0.182544	0.197282
302	0.669569	0.395492	0.524143		302	0.179996	0.18206	0.196565
303	0.670217	0.397302	0.522634		303	0.179142	0.183421	0.197197
304	0.668019	0.393874	0.52371		304	0.178496	0.182218	0.196618
305	0.668767	0.395632	0.523693		305	0.178334	0.180989	0.195895
306	0.669134	0.392342	0.524627		306	0.178559	0.181899	0.195237
307	0.667513	0.39445	0.523481		307	0.176962	0.181602	0.194931
308	0.671089	0.394404	0.523279		308	0.177325	0.181132	0.195189
309	0.666893	0.392887	0.52475		309	0.176241	0.180704	0.194065
310	0.663868	0.393615	0.523426		310	0.17677	0.180604	0.194309
311	0.667693	0.394208	0.523536		311	0.175127	0.179434	0.193886
312	0.667143	0.395378	0.524699		312	0.175388	0.179911	0.193219
313	0.666872	0.392701	0.522777		313	0.174948	0.179881	0.193471
314	0.665501	0.391566	0.523088		314	0.174944	0.180385	0.192916
315	0.666098	0.393202	0.52342		315	0.174495	0.180125	0.19222
316	0.668554	0.392609	0.522092		316	0.174281	0.179676	0.192012
317	0.666745	0.39408	0.523798		317	0.174085	0.180148	0.191408
318	0.666756	0.393354	0.523387		318	0.172937	0.179762	0.191661
319	0.664839	0.393434	0.522456		319	0.172412	0.178019	0.191977
320	0.662372	0.392538	0.521467		320	0.172001	0.179412	0.190175
321	0.665216	0.39258	0.522591		321	0.172221	0.17715	0.190492
322	0.665506	0.392411	0.522334		322	0.171574	0.178295	0.190555
323	0.667215	0.392869	0.522134		323	0.171467	0.178147	0.190103
324	0.66534	0.390365	0.521936		324	0.171655	0.18033	0.189697
325	0.666082	0.390972	0.522373		325	0.170405	0.175948	0.18931
326	0.663476	0.392496	0.522248		326	0.170128	0.177512	0.189006
327	0.667516	0.392294	0.521295		327	0.169732	0.175987	0.188953
328	0.665137	0.391422	0.521418		328	0.169677	0.176072	0.188343
329	0.663455	0.391025	0.522002		329	0.169269	0.176487	0.188142
330	0.666297	0.392391	0.521032		330	0.169106	0.177638	0.188194
331	0.66531	0.387656	0.521066		331	0.168767	0.176232	0.187449
332	0.665185	0.389536	0.521446		332	0.167583	0.176002	0.187526
333	0.662569	0.393198	0.520835		333	0.167824	0.176068	0.187815
334	0.663927	0.390597	0.520473		334	0.167051	0.176471	0.186933
335	0.662758	0.38874	0.521176		335	0.167978	0.175758	0.186183
336	0.662409	0.387764	0.522194		336	0.167694	0.176971	0.186303
337	0.663846	0.388902	0.522229		337	0.166976	0.175902	0.185528
338	0.661607	0.389568	0.52226		338	0.166028	0.176501	0.184859
339	0.66485	0.389769	0.520295		339	0.165943	0.175592	0.185659
340	0.663176	0.38995	0.520297		340	0.165487	0.174274	0.185757
341	0.659399	0.38842	0.520277		341	0.165806	0.174975	0.184855
342	0.662725	0.387939	0.520754		342	0.165073	0.174189	0.184307
343	0.661595	0.388551	0.520386		343	0.164671	0.17497	0.183808
344	0.661062	0.387041	0.521381		344	0.165572	0.173836	0.184292
345	0.663194	0.387723	0.519854		345	0.163904	0.173621	0.183279
346	0.663178	0.387453	0.520654		346	0.162998	0.172383	0.183494
347	0.661005	0.388881	0.519746		347	0.164126	0.173152	0.183398
348	0.660433	0.386517	0.52107		348	0.164355	0.174073	0.183111
349	0.663161	0.386628	0.519243		349	0.161861	0.172318	0.182564
350	0.659423	0.386596	0.519795		350	0.161737	0.17295	0.182465
351	0.66328	0.385595	0.520123		351	0.162365	0.173643	0.182579
352	0.66056	0.385833	0.518219		352	0.161976	0.174216	0.181658
353	0.662446	0.386884	0.518895		353	0.161688	0.172182	0.181845
354	0.660401	0.386466	0.519898		354	0.16175	0.17276	0.181164
355	0.660607	0.38718	0.518831		355	0.161518	0.170925	0.181741
356	0.660513	0.386772	0.518077		356	0.160581	0.17136	0.181163
357	0.660345	0.386554	0.517662		357	0.160311	0.172462	0.181059
358	0.660545	0.38751	0.518545		358	0.161093	0.170997	0.180696
359	0.658829	0.386194	0.517723		359	0.159873	0.172622	0.181097
360	0.660613	0.386645	0.517991		360	0.159576	0.170847	0.180522
361	0.661125	0.385561	0.519579		361	0.159848	0.170975	0.179547
362	0.659946	0.385527	0.517981		362	0.159681	0.172287	0.179538
363	0.659121	0.386182	0.517845		363	0.158452	0.172706	0.179824
364	0.66082	0.385434	0.518863		364	0.15825	0.16958	0.178629
365	0.659099	0.384799	0.517675		365	0.156889	0.170408	0.178808
366	0.660202	0.383029	0.517636		366	0.157539	0.170472	0.178687
367	0.657901	0.384375	0.518566		367	0.157703	0.170107	0.178061
368	0.659246	0.382545	0.517928		368	0.157858	0.169494	0.178022
369	0.658163	0.384456	0.519204		369	0.157397	0.169448	0.177789
370	0.658031	0.381058	0.518689		370	0.156682	0.169712	0.178009
371	0.658701	0.382903	0.518873		371	0.156699	0.170355	0.17736
372	0.658487	0.385141	0.517395		372	0.156276	0.169198	0.176789
373	0.658046	0.382165	0.518157		373	0.156029	0.169218	0.176734
374	0.660638	0.382937	0.518131		374	0.154676	0.169405	0.175743
375	0.657684	0.38289	0.516236		375	0.154983	0.168308	0.176346
376	0.657357	0.383374	0.516474		376	0.154633	0.167976	0.176363
377	0.656617	0.383651	0.517656		377	0.155318	0.16693	0.176492
378	0.656975	0.382211	0.516593		378	0.154804	0.167547	0.175818
379	0.657245	0.384861	0.516623		379	0.153948	0.168506	0.175715
380	0.6575	0.383375	0.517692		380	0.153814	0.169783	0.175957
381	0.654624	0.382891	0.516883		381	0.153781	0.168193	0.175344
382	0.658516	0.384592	0.516984		382	0.153195	0.167572	0.174819
383	0.658645	0.382374	0.516623		383	0.153532	0.167686	0.174565
384	0.657186	0.382341	0.515605		384	0.152977	0.168359	0.174831
385	0.657629	0.382281	0.516817		385	0.152741	0.168129	0.174455
386	0.655646	0.380251	0.516233		386	0.151683	0.166925	0.174056
387	0.656491	0.379933	0.515827		387	0.152809	0.167591	0.174039
388	0.656835	0.381865	0.514873		388	0.152458	0.166907	0.173817
389	0.655417	0.381443	0.516381		389	0.152413	0.169283	0.173615
390	0.656603	0.379866	0.516127		390	0.1517	0.166902	0.173299
391	0.655487	0.38074	0.515286		391	0.151375	0.16589	0.17329
392	0.655323	0.381802	0.51498		392	0.151172	0.166715	0.172131
393	0.656085	0.37898	0.515366		393	0.150393	0.165903	0.172582
394	0.65451	0.380871	0.51579		394	0.149938	0.165028	0.173
395	0.65587	0.37841	0.515039		395	0.15024	0.165698	0.172491
396	0.656969	0.379408	0.516271		396	0.150098	0.164383	0.172372
397	0.657251	0.378953	0.515764		397	0.150282	0.166254	0.171731
398	0.654671	0.380775	0.514518		398	0.149298	0.166852	0.171581
399	0.655898	0.379746	0.515011		399	0.149649	0.163897	0.17092
400	0.654288	0.379017	0.514642		400	0.14926	0.165333	0.170581
401	0.655723	0.379068	0.51381		401	0.149373	0.164891	0.170696
402	0.655589	0.380232	0.514706		402	0.148664	0.167419	0.170701
403	0.654948	0.379567	0.514683		403	0.148248	0.164983	0.170615
404	0.655497	0.377316	0.514526		404	0.148569	0.16483	0.17096
405	0.653574	0.37777	0.51408		405	0.149079	0.163777	0.170418
406	0.653249	0.378515	0.51396		406	0.147007	0.163853	0.169777
407	0.658568	0.379742	0.514544		407	0.147188	0.165024	0.169607
408	0.652977	0.378119	0.514218		408	0.147474	0.164156	0.169433
409	0.655363	0.37661	0.514182		409	0.146835	0.16426	0.169189
410	0.654169	0.376903	0.51393		410	0.146191	0.164194	0.16952
411	0.654092	0.376252	0.513797		411	0.146367	0.163682	0.169234
412	0.656511	0.37839	0.513606		412	0.145996	0.162657	0.168797
413	0.655372	0.37675	0.514826		413	0.145905	0.163883	0.168154
414	0.654511	0.376998	0.513238		414	0.146313	0.163207	0.168258
415	0.654339	0.377851	0.513816		415	0.145458	0.162659	0.16787
416	0.654466	0.377621	0.514734		416	0.145027	0.163142	0.16801
417	0.654577	0.376997	0.513769		417	0.144897	0.161989	0.167666
418	0.655205	0.378423	0.513132		418	0.144007	0.163301	0.167625
419	0.65271	0.377372	0.513799		419	0.145569	0.164236	0.167186
420	0.650475	0.375421	0.512852		420	0.145303	0.163292	0.167231
421	0.654352	0.375753	0.512235		421	0.143699	0.16241	0.16696
422	0.654711	0.374413	0.512804		422	0.144034	0.16205	0.166706
423	0.653615	0.376648	0.511882		423	0.144066	0.162569	0.166957
424	0.65361	0.376657	0.512369		424	0.143302	0.161221	0.166659
425	0.650788	0.374286	0.513308		425	0.143487	0.163388	0.166353
426	0.655124	0.374138	0.512752		426	0.142636	0.161218	0.166213
427	0.651676	0.375874	0.512439		427	0.143263	0.161051	0.165676
428	0.651362	0.375723	0.51193		428	0.144229	0.160755	0.165699
429	0.65365	0.374431	0.512963		429	0.142559	0.161328	0.16607
430	0.652129	0.374642	0.513068		430	0.142113	0.160893	0.165334
431	0.653106	0.375524	0.512238		431	0.14172	0.160731	0.165754
432	0.651602	0.375279	0.512738		432	0.142406	0.160816	0.165202
433	0.651936	0.371446	0.511798		433	0.14233	0.161306	0.165047
434	0.650002	0.375018	0.511735		434	0.141902	0.160358	0.16449
435	0.6519	0.37351	0.511347		435	0.141117	0.161668	0.164381
436	0.649612	0.373692	0.512278		436	0.141431	0.161726	0.163682
437	0.650231	0.373131	0.511369		437	0.141109	0.161852	0.164139
438	0.651812	0.376296	0.511433		438	0.14022	0.159838	0.163972
439	0.650698	0.374782	0.512492		439	0.140749	0.16013	0.163526
440	0.651979	0.373322	0.511839		440	0.1413	0.159044	0.163725
441	0.650149	0.37313	0.511396		441	0.140685	0.160118	0.163592
442	0.651407	0.372695	0.511582		442	0.140054	0.159165	0.163458
443	0.64878	0.37207	0.511309		443	0.13979	0.159223	0.16255
444	0.650226	0.377066	0.512405		444	0.139586	0.160074	0.162739
445	0.650737	0.373033	0.510351		445	0.139184	0.159545	0.162953
446	0.649019	0.372537	0.511473		446	0.139065	0.159205	0.162521
447	0.649981	0.374401	0.510974		447	0.138716	0.160313	0.162806
448	0.649327	0.372141	0.510936		448	0.138656	0.159031	0.16249
449	0.650991	0.373368	0.510807		449	0.139014	0.158974	0.162075
450	0.650262	0.371619	0.511317		450	0.137456	0.15899	0.161976
451	0.650908	0.370323	0.511107		451	0.137983	0.159445	0.16098
452	0.649309	0.372817	0.511155		452	0.13819	0.157942	0.161642
453	0.650508	0.369999	0.510616		453	0.137562	0.158045	0.161205
454	0.650109	0.370246	0.511204		454	0.138332	0.158766	0.16123
455	0.648715	0.373235	0.511898		455	0.138628	0.157524	0.161052
456	0.649094	0.372426	0.510957		456	0.137516	0.157908	0.161404
457	0.651525	0.37239	0.510485		457	0.136705	0.158175	0.160817
458	0.649056	0.373221	0.510218		458	0.136461	0.157481	0.160162
459	0.650872	0.372284	0.510304		459	0.136832	0.156918	0.160807
460	0.648725	0.369618	0.509854		460	0.136455	0.15792	0.160372
461	0.649507	0.369865	0.509774		461	0.13591	0.156662	0.160272
462	0.649309	0.369788	0.511743		462	0.136727	0.157294	0.159765
463	0.648696	0.371218	0.510744		463	0.136152	0.158081	0.159578
464	0.650036	0.370611	0.509009		464	0.135522	0.156392	0.159555
465	0.647914	0.37015	0.510271		465	0.135934	0.156229	0.158848
466	0.649405	0.368938	0.510137		466	0.135869	0.156741	0.159085
467	0.647601	0.369236	0.509936		467	0.135246	0.156568	0.159256
468	0.65057	0.369157	0.508739		468	0.134614	0.156894	0.158728
469	0.646377	0.371892	0.50933		469	0.134964	0.15613	0.158757
470	0.648208	0.368406	0.50989		470	0.134384	0.155937	0.158716
471	0.649065	0.369047	0.511123		471	0.13526	0.155797	0.158604
472	0.648547	0.367364	0.509772		472	0.134717	0.155511	0.158819
473	0.648731	0.371795	0.509026		473	0.134567	0.154669	0.158796
474	0.647164	0.37057	0.50843		474	0.134154	0.155527	0.157912
475	0.648689	0.368654	0.508053		475	0.133063	0.155801	0.157915
476	0.648571	0.369324	0.510254		476	0.134214	0.156344	0.157974
477	0.648351	0.368993	0.50912		477	0.134143	0.15464	0.157743
478	0.647222	0.367528	0.510131		478	0.133569	0.155514	0.157532
479	0.649026	0.367419	0.508475		479	0.132933	0.157448	0.156997
480	0.647048	0.367601	0.509737		480	0.132501	0.154434	0.156773
481	0.647564	0.368086	0.508235		481	0.132359	0.155585	0.156716
482	0.645322	0.367756	0.509011		482	0.132452	0.15395	0.156749
483	0.647944	0.367774	0.507717		483	0.133071	0.155923	0.156446
484	0.648648	0.366363	0.509082		484	0.132892	0.155434	0.156473
485	0.646738	0.366988	0.508426		485	0.132328	0.154583	0.156109
486	0.647712	0.367435	0.507667		486	0.131132	0.153921	0.156213
487	0.644334	0.367203	0.508983		487	0.131255	0.154501	0.156578
488	0.646109	0.367587	0.508324		488	0.131001	0.155222	0.155751
489	0.647085	0.367637	0.507632		489	0.131937	0.154001	0.15638
490	0.647698	0.366908	0.507494		490	0.130844	0.153268	0.155909
491	0.6469	0.369057	0.508992		491	0.130831	0.153558	0.155632
492	0.645246	0.366858	0.508368		492	0.130544	0.15296	0.15555
493	0.647513	0.365927	0.508018		493	0.129951	0.154609	0.155248
494	0.64565	0.364476	0.5084		494	0.130186	0.154196	0.155403
495	0.645667	0.366212	0.507968		495	0.130284	0.153861	0.154779
496	0.646164	0.364476	0.507626		496	0.130069	0.153966	0.155215
497	0.64629	0.366233	0.507369		497	0.130508	0.154651	0.154877
498	0.6472	0.364049	0.508497		498	0.130229	0.154382	0.154454
499	0.647278	0.367982	0.508077		499	0.130005	0.152918	0.154123
500	0.645541	0.369237	0.506539		500	0.129178	0.153647	0.154026
501	0.645791	0.366427	0.507068		501	0.13005	0.152626	0.154208
502	0.64392	0.36491	0.505759		502	0.129358	0.153307	0.154031
503	0.644445	0.362673	0.508128		503	0.129203	0.153344	0.15362
504	0.643906	0.363635	0.506466		504	0.129301	0.152093	0.153478
505	0.643051	0.366609	0.507782		505	0.129134	0.153186	0.153617
506	0.645887	0.365949	0.506054		506	0.128243	0.152107	0.152713
507	0.646165	0.364101	0.507192		507	0.12903	0.15102	0.153481
508	0.643455	0.36232	0.50733		508	0.12854	0.151958	0.152683
509	0.647884	0.366037	0.506574		509	0.127595	0.15317	0.153132
510	0.646302	0.3674	0.50683		510	0.127954	0.152967	0.152385
511	0.645228	0.362244	0.50644		511	0.127442	0.151661	0.152449
512	0.645588	0.364764	0.50711		512	0.127944	0.151884	0.152439
513	0.644403	0.362224	0.506106		513	0.127258	0.151161	0.152399
514	0.644069	0.363268	0.506672		514	0.127255	0.1529	0.152229
515	0.644539	0.363566	0.506955		515	0.127556	0.152456	0.152437
516	0.64364	0.361524	0.505836		516	0.126779	0.151946	0.152437
517	0.64274	0.366492	0.506895		517	0.127729	0.15115	0.151883
518	0.643839	0.363134	0.506237		518	0.126711	0.15112	0.15194
519	0.645667	0.362594	0.5069		519	0.126547	0.151018	0.151867
520	0.644583	0.361824	0.506884		520	0.127024	0.151864	0.151321
521	0.642693	0.361844	0.50571		521	0.1264	0.150497	0.151194
522	0.644569	0.362598	0.506447		522	0.126888	0.152233	0.151339
523	0.642529	0.362368	0.503957		523	0.125627	0.15068	0.150985
524	0.643815	0.361831	0.506126		524	0.125969	0.150005	0.151344
525	0.642945	0.363076	0.505299		525	0.125891	0.150612	0.150875
526	0.643358	0.362188	0.505927		526	0.125472	0.14999	0.151137
527	0.642157	0.361679	0.505484		527	0.125663	0.150186	0.151004
528	0.644125	0.363379	0.505839		528	0.124464	0.150041	0.150651
529	0.642726	0.360198	0.504986		529	0.125059	0.150436	0.150003
530	0.644436	0.363855	0.505635		530	0.125363	0.150832	0.150493
531	0.641824	0.363251	0.505633		531	0.124996	0.149276	0.149814
532	0.643367	0.361025	0.505518		532	0.124289	0.149774	0.15035
533	0.642863	0.360618	0.504175		533	0.124495	0.14985	0.150048
534	0.641317	0.359995	0.505807		534	0.124883	0.148747	0.149839
535	0.643182	0.36224	0.505215		535	0.123653	0.149488	0.149547
536	0.640671	0.362715	0.504537		536	0.124604	0.150856	0.148772
537	0.641604	0.361126	0.505925		537	0.123497	0.150448	0.149165
538	0.642516	0.360907	0.505013		538	0.124308	0.149172	0.149474
539	0.64505	0.360445	0.504061		539	0.123898	0.14907	0.149706
540	0.641095	0.36203	0.504977		540	0.123077	0.148746	0.149309
541	0.63962	0.35947	0.504006		541	0.12355	0.149754	0.149054
542	0.641136	0.36123	0.504212		542	0.123525	0.149237	0.148595
543	0.640289	0.361489	0.504617		543	0.122795	0.149275	0.149151
544	0.641567	0.358225	0.503797		544	0.123086	0.148335	0.148484
545	0.642505	0.359728	0.505537		545	0.122852	0.148495	0.148654
546	0.645235	0.35862	0.50411		546	0.123224	0.147795	0.148286
547	0.640764	0.362693	0.505094		547	0.122019	0.149053	0.147776
548	0.64146	0.359762	0.504777		548	0.122571	0.148926	0.148018
549	0.638634	0.35965	0.503275		549	0.122509	0.148414	0.147944
550	0.641012	0.359696	0.504625		550	0.122177	0.149321	0.147635
551	0.642833	0.359982	0.503374		551	0.12209	0.148652	0.147487
552	0.64071	0.357344	0.504768		552	0.123015	0.149073	0.147386
553	0.641366	0.357736	0.504203		553	0.122249	0.147965	0.147604
554	0.641769	0.358573	0.50404		554	0.121736	0.148519	0.146691
555	0.640157	0.358154	0.505145		555	0.121655	0.147422	0.147319
556	0.641326	0.358686	0.504642		556	0.120515	0.146948	0.147015
557	0.641858	0.355991	0.503644		557	0.121249	0.147312	0.147043
558	0.640467	0.359179	0.503269		558	0.121051	0.146976	0.14652
559	0.638957	0.356062	0.503532		559	0.121235	0.147129	0.146797
560	0.63976	0.357556	0.503772		560	0.12112	0.147795	0.14657
561	0.639579	0.358231	0.503486		561	0.12035	0.146777	0.146365
562	0.638814	0.358427	0.503248		562	0.120222	0.146574	0.146259
563	0.640104	0.357242	0.50335		563	0.121079	0.147609	0.1458
564	0.639007	0.357669	0.504042		564	0.12069	0.148205	0.145613
565	0.640724	0.358151	0.502971		565	0.119775	0.148191	0.145898
566	0.640916	0.356006	0.504231		566	0.120471	0.145918	0.145481
567	0.639051	0.357448	0.503673		567	0.119663	0.14641	0.145635
568	0.640408	0.358044	0.501747		568	0.120368	0.146351	0.146135
569	0.638805	0.354404	0.503945		569	0.119986	0.145737	0.145464
570	0.642197	0.356728	0.504462		570	0.119148	0.146207	0.145802
571	0.637958	0.356887	0.502863		571	0.120218	0.146126	0.145732
572	0.63934	0.355487	0.503008		572	0.118971	0.146243	0.145356
573	0.639106	0.356915	0.50286		573	0.119133	0.145397	0.145425
574	0.637977	0.355896	0.502037		574	0.118844	0.145464	0.145041
575	0.638374	0.356506	0.503392		575	0.11884	0.146066	0.144593
576	0.640308	0.354664	0.503074		576	0.119655	0.146435	0.144895
577	0.639826	0.355828	0.503521		577	0.117983	0.145824	0.144782
578	0.64016	0.356936	0.502598		578	0.118756	0.145905	0.144588
579	0.639583	0.356409	0.502386		579	0.11857	0.146	0.144492
580	0.636282	0.354122	0.502985		580	0.118351	0.145254	0.144094
581	0.638822	0.354352	0.502242		581	0.118796	0.145825	0.14406
582	0.638762	0.354285	0.502741		582	0.1182	0.144879	0.144652
583	0.638176	0.356963	0.503204		583	0.118094	0.144734	0.144738
584	0.638817	0.354272	0.5024		584	0.1171	0.145076	0.144316
585	0.638745	0.355452	0.503492		585	0.11835	0.145797	0.143497
586	0.636759	0.355004	0.500829		586	0.117918	0.145119	0.143902
587	0.638284	0.353594	0.501713		587	0.117006	0.144997	0.143476
588	0.63621	0.355927	0.502223		588	0.117434	0.144923	0.143513
589	0.636474	0.354634	0.502497		589	0.117672	0.144536	0.143109
590	0.637436	0.355173	0.502543		590	0.117666	0.145199	0.143676
591	0.638496	0.353685	0.501995		591	0.1163	0.145191	0.143416
592	0.637317	0.356227	0.502541		592	0.117326	0.145331	0.142746
593	0.636541	0.352921	0.501527		593	0.116786	0.14383	0.142707
594	0.638009	0.354793	0.50165		594	0.116453	0.144366	0.142891
595	0.63735	0.352968	0.500946		595	0.116865	0.144316	0.142988
596	0.636281	0.352278	0.500478		596	0.116551	0.143327	0.142188
597	0.636911	0.353408	0.500896		597	0.116262	0.143784	0.142413
598	0.637321	0.352276	0.502251		598	0.115965	0.143678	0.142102
599	0.637859	0.352282	0.502105		599	0.116855	0.143782	0.142146
600	0.641972	0.352068	0.499376		600	0.115301	0.142481	0.142133
	#DIV/0!	#DIV/0!	#DIV/0!			#DIV/0!	#DIV/0!	#DIV/0!
	#DIV/0!	#DIV/0!	#DIV/0!			#DIV/0!	#DIV/0!	#DIV/0!
	#DIV/0!	#DIV/0!	#DIV/0!			#DIV/0!	#DIV/0!	#DIV/0!
	#DIV/0!	#DIV/0!	#DIV/0!			#DIV/0!	#DIV/0!	#DIV/0!
	#DIV/0!	#DIV/0!	#DIV/0!			#DIV/0!	#DIV/0!	#DIV/0!
	#DIV/0!	#DIV/0!	#DIV/0!			#DIV/0!	#DIV/0!	#DIV/0!
	#DIV/0!	#DIV/0!	#DIV/0!			#DIV/0!	#DIV/0!	#DIV/0!
	#DIV/0!	#DIV/0!	#DIV/0!			#DIV/0!	#DIV/0!	#DIV/0!
	#DIV/0!	#DIV/0!	#DIV/0!			#DIV/0!	#DIV/0!	#DIV/0!
	#DIV/0!	#DIV/0!	#DIV/0!			#DIV/0!	#DIV/0!	#DIV/0!
	#DIV/0!	#DIV/0!	#DIV/0!			#DIV/0!	#DIV/0!	#DIV/0!
	#DIV/0!	#DIV/0!	#DIV/0!			#DIV/0!	#DIV/0!	#DIV/0!
	#DIV/0!	#DIV/0!	#DIV/0!			#DIV/0!	#DIV/0!	#DIV/0!
	#DIV/0!	#DIV/0!	#DIV/0!			#DIV/0!	#DIV/0!	#DIV/0!
	#DIV/0!	#DIV/0!	#DIV/0!			#DIV/0!	#DIV/0!	#DIV/0!
	#DIV/0!	#DIV/0!	#DIV/0!			#DIV/0!	#DIV/0!	#DIV/0!
	#DIV/0!	#DIV/0!	#DIV/0!			#DIV/0!	#DIV/0!	#DIV/0!
	#DIV/0!	#DIV/0!	#DIV/0!			#DIV/0!	#DIV/0!	#DIV/0!
	#DIV/0!	#DIV/0!	#DIV/0!			#DIV/0!	#DIV/0!	#DIV/0!
	#DIV/0!	#DIV/0!	#DIV/0!			#DIV/0!	#DIV/0!	#DIV/0!
	#DIV/0!	#DIV/0!	#DIV/0!			#DIV/0!	#DIV/0!	#DIV/0!
	#DIV/0!	#DIV/0!	#DIV/0!			#DIV/0!	#DIV/0!	#DIV/0!
	#DIV/0!	#DIV/0!	#DIV/0!			#DIV/0!	#DIV/0!	#DIV/0!
	#DIV/0!	#DIV/0!	#DIV/0!			#DIV/0!	#DIV/0!	#DIV/0!
	#DIV/0!	#DIV/0!	#DIV/0!			#DIV/0!	#DIV/0!	#DIV/0!
	#DIV/0!	#DIV/0!	#DIV/0!			#DIV/0!	#DIV/0!	#DIV/0!
	#DIV/0!	#DIV/0!	#DIV/0!			#DIV/0!	#DIV/0!	#DIV/0!
	#DIV/0!	#DIV/0!	#DIV/0!			#DIV/0!	#DIV/0!	#DIV/0!
	#DIV/0!	#DIV/0!	#DIV/0!			#DIV/0!	#DIV/0!	#DIV/0!
	#DIV/0!	#DIV/0!	#DIV/0!			#DIV/0!	#DIV/0!	#DIV/0!
	#DIV/0!	#DIV/0!	#DIV/0!			#DIV/0!	#DIV/0!	#DIV/0!
	#DIV/0!	#DIV/0!	#DIV/0!			#DIV/0!	#DIV/0!	#DIV/0!
	#DIV/0!	#DIV/0!	#DIV/0!			#DIV/0!	#DIV/0!	#DIV/0!
	#DIV/0!	#DIV/0!	#DIV/0!			#DIV/0!	#DIV/0!	#DIV/0!
	#DIV/0!	#DIV/0!	#DIV/0!			#DIV/0!	#DIV/0!	#DIV/0!
	#DIV/0!	#DIV/0!	#DIV/0!			#DIV/0!	#DIV/0!	#DIV/0!
	#DIV/0!	#DIV/0!	#DIV/0!			#DIV/0!	#DIV/0!	#DIV/0!
	#DIV/0!	#DIV/0!	#DIV/0!			#DIV/0!	#DIV/0!	#DIV/0!
	#DIV/0!	#DIV/0!	#DIV/0!			#DIV/0!	#DIV/0!	#DIV/0!
	#DIV/0!	#DIV/0!	#DIV/0!			#DIV/0!	#DIV/0!	#DIV/0!
	#DIV/0!	#DIV/0!	#DIV/0!			#DIV/0!	#DIV/0!	#DIV/0!
	#DIV/0!	#DIV/0!	#DIV/0!			#DIV/0!	#DIV/0!	#DIV/0!
	#DIV/0!	#DIV/0!	#DIV/0!			#DIV/0!	#DIV/0!	#DIV/0!
	#DIV/0!	#DIV/0!	#DIV/0!			#DIV/0!	#DIV/0!	#DIV/0!
	#DIV/0!	#DIV/0!	#DIV/0!			#DIV/0!	#DIV/0!	#DIV/0!
	#DIV/0!	#DIV/0!	#DIV/0!			#DIV/0!	#DIV/0!	#DIV/0!
	#DIV/0!	#DIV/0!	#DIV/0!			#DIV/0!	#DIV/0!	#DIV/0!
	#DIV/0!	#DIV/0!	#DIV/0!			#DIV/0!	#DIV/0!	#DIV/0!
	#DIV/0!	#DIV/0!	#DIV/0!			#DIV/0!	#DIV/0!	#DIV/0!
	#DIV/0!	#DIV/0!	#DIV/0!			#DIV/0!	#DIV/0!	#DIV/0!
	#DIV/0!	#DIV/0!	#DIV/0!			#DIV/0!	#DIV/0!	#DIV/0!
	#DIV/0!	#DIV/0!	#DIV/0!			#DIV/0!	#DIV/0!	#DIV/0!
	#DIV/0!	#DIV/0!	#DIV/0!			#DIV/0!	#DIV/0!	#DIV/0!
	#DIV/0!	#DIV/0!	#DIV/0!			#DIV/0!	#DIV/0!	#DIV/0!
	#DIV/0!	#DIV/0!	#DIV/0!			#DIV/0!	#DIV/0!	#DIV/0!
	#DIV/0!	#DIV/0!	#DIV/0!			#DIV/0!	#DIV/0!	#DIV/0!
	#DIV/0!	#DIV/0!	#DIV/0!			#DIV/0!	#DIV/0!	#DIV/0!
	#DIV/0!	#DIV/0!	#DIV/0!			#DIV/0!	#DIV/0!	#DIV/0!
	#DIV/0!	#DIV/0!	#DIV/0!			#DIV/0!	#DIV/0!	#DIV/0!
	#DIV/0!	#DIV/0!	#DIV/0!			#DIV/0!	#DIV/0!	#DIV/0!
	#DIV/0!	#DIV/0!	#DIV/0!			#DIV/0!	#DIV/0!	#DIV/0!
	#DIV/0!	#DIV/0!	#DIV/0!			#DIV/0!	#DIV/0!	#DIV/0!
	#DIV/0!	#DIV/0!	#DIV/0!			#DIV/0!	#DIV/0!	#DIV/0!
	#DIV/0!	#DIV/0!	#DIV/0!			#DIV/0!	#DIV/0!	#DIV/0!
	#DIV/0!	#DIV/0!	#DIV/0!			#DIV/0!	#DIV/0!	#DIV/0!
	#DIV/0!	#DIV/0!	#DIV/0!			#DIV/0!	#DIV/0!	#DIV/0!
	#DIV/0!	#DIV/0!	#DIV/0!			#DIV/0!	#DIV/0!	#DIV/0!
	#DIV/0!	#DIV/0!	#DIV/0!			#DIV/0!	#DIV/0!	#DIV/0!
	#DIV/0!	#DIV/0!	#DIV/0!			#DIV/0!	#DIV/0!	#DIV/0!
	#DIV/0!	#DIV/0!	#DIV/0!			#DIV/0!	#DIV/0!	#DIV/0!
	#DIV/0!	#DIV/0!	#DIV/0!			#DIV/0!	#DIV/0!	#DIV/0!
	#DIV/0!	#DIV/0!	#DIV/0!			#DIV/0!	#DIV/0!	#DIV/0!
	#DIV/0!	#DIV/0!	#DIV/0!			#DIV/0!	#DIV/0!	#DIV/0!
	#DIV/0!	#DIV/0!	#DIV/0!			#DIV/0!	#DIV/0!	#DIV/0!
	#DIV/0!	#DIV/0!	#DIV/0!			#DIV/0!	#DIV/0!	#DIV/0!
	#DIV/0!	#DIV/0!	#DIV/0!			#DIV/0!	#DIV/0!	#DIV/0!
	#DIV/0!	#DIV/0!	#DIV/0!			#DIV/0!	#DIV/0!	#DIV/0!
	#DIV/0!	#DIV/0!	#DIV/0!			#DIV/0!	#DIV/0!	#DIV/0!
	#DIV/0!	#DIV/0!	#DIV/0!			#DIV/0!	#DIV/0!	#DIV/0!
	#DIV/0!	#DIV/0!	#DIV/0!			#DIV/0!	#DIV/0!	#DIV/0!
	#DIV/0!	#DIV/0!	#DIV/0!			#DIV/0!	#DIV/0!	#DIV/0!
	#DIV/0!	#DIV/0!	#DIV/0!			#DIV/0!	#DIV/0!	#DIV/0!
	#DIV/0!	#DIV/0!	#DIV/0!			#DIV/0!	#DIV/0!	#DIV/0!
	#DIV/0!	#DIV/0!	#DIV/0!			#DIV/0!	#DIV/0!	#DIV/0!
	#DIV/0!	#DIV/0!	#DIV/0!			#DIV/0!	#DIV/0!	#DIV/0!
	#DIV/0!	#DIV/0!	#DIV/0!			#DIV/0!	#DIV/0!	#DIV/0!
	#DIV/0!	#DIV/0!	#DIV/0!			#DIV/0!	#DIV/0!	#DIV/0!
	#DIV/0!	#DIV/0!	#DIV/0!			#DIV/0!	#DIV/0!	#DIV/0!
	#DIV/0!	#DIV/0!	#DIV/0!			#DIV/0!	#DIV/0!	#DIV/0!
	#DIV/0!	#DIV/0!	#DIV/0!			#DIV/0!	#DIV/0!	#DIV/0!
	#DIV/0!	#DIV/0!	#DIV/0!			#DIV/0!	#DIV/0!	#DIV/0!
	#DIV/0!	#DIV/0!	#DIV/0!			#DIV/0!	#DIV/0!	#DIV/0!
	#DIV/0!	#DIV/0!	#DIV/0!			#DIV/0!	#DIV/0!	#DIV/0!
	#DIV/0!	#DIV/0!	#DIV/0!			#DIV/0!	#DIV/0!	#DIV/0!
	#DIV/0!	#DIV/0!	#DIV/0!			#DIV/0!	#DIV/0!	#DIV/0!
	#DIV/0!	#DIV/0!	#DIV/0!			#DIV/0!	#DIV/0!	#DIV/0!
	#DIV/0!	#DIV/0!	#DIV/0!			#DIV/0!	#DIV/0!	#DIV/0!
	#DIV/0!	#DIV/0!	#DIV/0!			#DIV/0!	#DIV/0!	#DIV/0!
	#DIV/0!	#DIV/0!	#DIV/0!			#DIV/0!	#DIV/0!	#DIV/0!
	#DIV/0!	#DIV/0!	#DIV/0!			#DIV/0!	#DIV/0!	#DIV/0!
	#DIV/0!	#DIV/0!	#DIV/0!			#DIV/0!	#DIV/0!	#DIV/0!
	#DIV/0!	#DIV/0!	#DIV/0!			#DIV/0!	#DIV/0!	#DIV/0!
	#DIV/0!	#DIV/0!	#DIV/0!			#DIV/0!	#DIV/0!	#DIV/0!
	#DIV/0!	#DIV/0!	#DIV/0!			#DIV/0!	#DIV/0!	#DIV/0!
	#DIV/0!	#DIV/0!	#DIV/0!			#DIV/0!	#DIV/0!	#DIV/0!
	#DIV/0!	#DIV/0!	#DIV/0!			#DIV/0!	#DIV/0!	#DIV/0!
	#DIV/0!	#DIV/0!	#DIV/0!			#DIV/0!	#DIV/0!	#DIV/0!
	#DIV/0!	#DIV/0!	#DIV/0!			#DIV/0!	#DIV/0!	#DIV/0!
	#DIV/0!	#DIV/0!	#DIV/0!			#DIV/0!	#DIV/0!	#DIV/0!
	#DIV/0!	#DIV/0!	#DIV/0!			#DIV/0!	#DIV/0!	#DIV/0!
	#DIV/0!	#DIV/0!	#DIV/0!			#DIV/0!	#DIV/0!	#DIV/0!
	#DIV/0!	#DIV/0!	#DIV/0!			#DIV/0!	#DIV/0!	#DIV/0!
	#DIV/0!	#DIV/0!	#DIV/0!			#DIV/0!	#DIV/0!	#DIV/0!
	#DIV/0!	#DIV/0!	#DIV/0!			#DIV/0!	#DIV/0!	#DIV/0!
	#DIV/0!	#DIV/0!	#DIV/0!			#DIV/0!	#DIV/0!	#DIV/0!
	#DIV/0!	#DIV/0!	#DIV/0!			#DIV/0!	#DIV/0!	#DIV/0!
	#DIV/0!	#DIV/0!	#DIV/0!			#DIV/0!	#DIV/0!	#DIV/0!
	#DIV/0!	#DIV/0!	#DIV/0!			#DIV/0!	#DIV/0!	#DIV/0!
	#DIV/0!	#DIV/0!	#DIV/0!			#DIV/0!	#DIV/0!	#DIV/0!
	#DIV/0!	#DIV/0!	#DIV/0!			#DIV/0!	#DIV/0!	#DIV/0!
	#DIV/0!	#DIV/0!	#DIV/0!			#DIV/0!	#DIV/0!	#DIV/0!
	#DIV/0!	#DIV/0!	#DIV/0!			#DIV/0!	#DIV/0!	#DIV/0!
	#DIV/0!	#DIV/0!	#DIV/0!			#DIV/0!	#DIV/0!	#DIV/0!
	#DIV/0!	#DIV/0!	#DIV/0!			#DIV/0!	#DIV/0!	#DIV/0!
	#DIV/0!	#DIV/0!	#DIV/0!			#DIV/0!	#DIV/0!	#DIV/0!
	#DIV/0!	#DIV/0!	#DIV/0!			#DIV/0!	#DIV/0!	#DIV/0!
	#DIV/0!	#DIV/0!	#DIV/0!			#DIV/0!	#DIV/0!	#DIV/0!
	#DIV/0!	#DIV/0!	#DIV/0!			#DIV/0!	#DIV/0!	#DIV/0!
	#DIV/0!	#DIV/0!	#DIV/0!			#DIV/0!	#DIV/0!	#DIV/0!
	#DIV/0!	#DIV/0!	#DIV/0!			#DIV/0!	#DIV/0!	#DIV/0!
	#DIV/0!	#DIV/0!	#DIV/0!			#DIV/0!	#DIV/0!	#DIV/0!
	#DIV/0!	#DIV/0!	#DIV/0!			#DIV/0!	#DIV/0!	#DIV/0!
	#DIV/0!	#DIV/0!	#DIV/0!			#DIV/0!	#DIV/0!	#DIV/0!
	#DIV/0!	#DIV/0!	#DIV/0!			#DIV/0!	#DIV/0!	#DIV/0!
	#DIV/0!	#DIV/0!	#DIV/0!			#DIV/0!	#DIV/0!	#DIV/0!
	#DIV/0!	#DIV/0!	#DIV/0!			#DIV/0!	#DIV/0!	#DIV/0!
	#DIV/0!	#DIV/0!	#DIV/0!			#DIV/0!	#DIV/0!	#DIV/0!
	#DIV/0!	#DIV/0!	#DIV/0!			#DIV/0!	#DIV/0!	#DIV/0!
	#DIV/0!	#DIV/0!	#DIV/0!			#DIV/0!	#DIV/0!	#DIV/0!
	#DIV/0!	#DIV/0!	#DIV/0!			#DIV/0!	#DIV/0!	#DIV/0!
	#DIV/0!	#DIV/0!	#DIV/0!			#DIV/0!	#DIV/0!	#DIV/0!
	#DIV/0!	#DIV/0!	#DIV/0!			#DIV/0!	#DIV/0!	#DIV/0!
	#DIV/0!	#DIV/0!	#DIV/0!			#DIV/0!	#DIV/0!	#DIV/0!
	#DIV/0!	#DIV/0!	#DIV/0!			#DIV/0!	#DIV/0!	#DIV/0!
	#DIV/0!	#DIV/0!	#DIV/0!			#DIV/0!	#DIV/0!	#DIV/0!
	#DIV/0!	#DIV/0!	#DIV/0!			#DIV/0!	#DIV/0!	#DIV/0!
	#DIV/0!	#DIV/0!	#DIV/0!			#DIV/0!	#DIV/0!	#DIV/0!
	#DIV/0!	#DIV/0!	#DIV/0!			#DIV/0!	#DIV/0!	#DIV/0!
	#DIV/0!	#DIV/0!	#DIV/0!			#DIV/0!	#DIV/0!	#DIV/0!
	#DIV/0!	#DIV/0!	#DIV/0!			#DIV/0!	#DIV/0!	#DIV/0!
	#DIV/0!	#DIV/0!	#DIV/0!			#DIV/0!	#DIV/0!	#DIV/0!
	#DIV/0!	#DIV/0!	#DIV/0!			#DIV/0!	#DIV/0!	#DIV/0!
	#DIV/0!	#DIV/0!	#DIV/0!			#DIV/0!	#DIV/0!	#DIV/0!
	#DIV/0!	#DIV/0!	#DIV/0!			#DIV/0!	#DIV/0!	#DIV/0!
	#DIV/0!	#DIV/0!	#DIV/0!			#DIV/0!	#DIV/0!	#DIV/0!
	#DIV/0!	#DIV/0!	#DIV/0!			#DIV/0!	#DIV/0!	#DIV/0!
	#DIV/0!	#DIV/0!	#DIV/0!			#DIV/0!	#DIV/0!	#DIV/0!
	#DIV/0!	#DIV/0!	#DIV/0!			#DIV/0!	#DIV/0!	#DIV/0!
	#DIV/0!	#DIV/0!	#DIV/0!			#DIV/0!	#DIV/0!	#DIV/0!
	#DIV/0!	#DIV/0!	#DIV/0!			#DIV/0!	#DIV/0!	#DIV/0!
	#DIV/0!	#DIV/0!	#DIV/0!			#DIV/0!	#DIV/0!	#DIV/0!
	#DIV/0!	#DIV/0!	#DIV/0!			#DIV/0!	#DIV/0!	#DIV/0!
	#DIV/0!	#DIV/0!	#DIV/0!			#DIV/0!	#DIV/0!	#DIV/0!
	#DIV/0!	#DIV/0!	#DIV/0!			#DIV/0!	#DIV/0!	#DIV/0!
	#DIV/0!	#DIV/0!	#DIV/0!			#DIV/0!	#DIV/0!	#DIV/0!
	#DIV/0!	#DIV/0!	#DIV/0!			#DIV/0!	#DIV/0!	#DIV/0!
	#DIV/0!	#DIV/0!	#DIV/0!			#DIV/0!	#DIV/0!	#DIV/0!
	#DIV/0!	#DIV/0!	#DIV/0!			#DIV/0!	#DIV/0!	#DIV/0!
	#DIV/0!	#DIV/0!	#DIV/0!			#DIV/0!	#DIV/0!	#DIV/0!
	#DIV/0!	#DIV/0!	#DIV/0!			#DIV/0!	#DIV/0!	#DIV/0!
	#DIV/0!	#DIV/0!	#DIV/0!			#DIV/0!	#DIV/0!	#DIV/0!
	#DIV/0!	#DIV/0!	#DIV/0!			#DIV/0!	#DIV/0!	#DIV/0!
	#DIV/0!	#DIV/0!	#DIV/0!			#DIV/0!	#DIV/0!	#DIV/0!
	#DIV/0!	#DIV/0!	#DIV/0!			#DIV/0!	#DIV/0!	#DIV/0!
	#DIV/0!	#DIV/0!	#DIV/0!			#DIV/0!	#DIV/0!	#DIV/0!
	#DIV/0!	#DIV/0!	#DIV/0!			#DIV/0!	#DIV/0!	#DIV/0!
	#DIV/0!	#DIV/0!	#DIV/0!			#DIV/0!	#DIV/0!	#DIV/0!
	#DIV/0!	#DIV/0!	#DIV/0!			#DIV/0!	#DIV/0!	#DIV/0!
	#DIV/0!	#DIV/0!	#DIV/0!			#DIV/0!	#DIV/0!	#DIV/0!
	#DIV/0!	#DIV/0!	#DIV/0!			#DIV/0!	#DIV/0!	#DIV/0!
	#DIV/0!	#DIV/0!	#DIV/0!			#DIV/0!	#DIV/0!	#DIV/0!
	#DIV/0!	#DIV/0!	#DIV/0!			#DIV/0!	#DIV/0!	#DIV/0!
	#DIV/0!	#DIV/0!	#DIV/0!			#DIV/0!	#DIV/0!	#DIV/0!
	#DIV/0!	#DIV/0!	#DIV/0!			#DIV/0!	#DIV/0!	#DIV/0!
	#DIV/0!	#DIV/0!	#DIV/0!			#DIV/0!	#DIV/0!	#DIV/0!
	#DIV/0!	#DIV/0!	#DIV/0!			#DIV/0!	#DIV/0!	#DIV/0!
	#DIV/0!	#DIV/0!	#DIV/0!			#DIV/0!	#DIV/0!	#DIV/0!
	#DIV/0!	#DIV/0!	#DIV/0!			#DIV/0!	#DIV/0!	#DIV/0!
	#DIV/0!	#DIV/0!	#DIV/0!			#DIV/0!	#DIV/0!	#DIV/0!
	#DIV/0!	#DIV/0!	#DIV/0!			#DIV/0!	#DIV/0!	#DIV/0!
	#DIV/0!	#DIV/0!	#DIV/0!			#DIV/0!	#DIV/0!	#DIV/0!
	#DIV/0!	#DIV/0!	#DIV/0!			#DIV/0!	#DIV/0!	#DIV/0!
	#DIV/0!	#DIV/0!	#DIV/0!			#DIV/0!	#DIV/0!	#DIV/0!
	#DIV/0!	#DIV/0!	#DIV/0!			#DIV/0!	#DIV/0!	#DIV/0!
	#DIV/0!	#DIV/0!	#DIV/0!			#DIV/0!	#DIV/0!	#DIV/0!
	#DIV/0!	#DIV/0!	#DIV/0!			#DIV/0!	#DIV/0!	#DIV/0!
	#DIV/0!	#DIV/0!	#DIV/0!			#DIV/0!	#DIV/0!	#DIV/0!
	#DIV/0!	#DIV/0!	#DIV/0!			#DIV/0!	#DIV/0!	#DIV/0!
	#DIV/0!	#DIV/0!	#DIV/0!			#DIV/0!	#DIV/0!	#DIV/0!
	#DIV/0!	#DIV/0!	#DIV/0!			#DIV/0!	#DIV/0!	#DIV/0!

## Sheet: Figure 2E
	Empty Liposomes with NBD-PE				SERINC3 Liposomes (1.5) with NBD-PE
Time (s)	exp-1	exp-2	exp-3		Time (s)	exp-1	exp-2	exp-3
0	1.0096	1.01815	1.01564		0	1.01264	1.01232	1.001
1	1.01569	1.01845	1.0095		1	1.01289	1.01656	1.00229
2	1.01869	1.01948	1.00926		2	1.00906	1.0167	1.00383
3	1.0128	1.0205	1.00982		3	1.01501	1.00829	1.00671
4	1.01323	1.01579	1.0055		4	1.0094	1.01191	1.00613
5	1.0157	1.01832	1.00827		5	1.01035	1.00936	1.00376
6	1.00893	1.01817	1.00836		6	1.01015	1.01436	1.00453
7	1.0157	1.01622	1.00641		7	1.00823	1.01872	1.00293
8	1.00865	1.01519	1.01183		8	1.00841	1.00971	1.00332
9	1.00912	1.01891	1.00776		9	1.01051	1.01303	1.00514
10	1.00985	1.01705	1.00991		10	1.00627	1.01646	1.0034
11	1.01077	1.01454	1.01056		11	1.00465	1.00958	1.00598
12	1.01559	1.01626	1.00948		12	1.00411	1.01011	1.00328
13	1.01587	1.01677	1.0096		13	1.0121	1.01217	1.00303
14	1.00902	1.0141	1.01145		14	1.00657	1.01502	1.00528
15	1.01169	1.01059	1.00937		15	1.01243	1.01439	1.00816
16	1.01128	1.01335	1.00621		16	1.00333	1.01162	1.00128
17	1.01321	1.01222	1.00445		17	1.00549	1.01226	1.00386
18	1.00876	1.01591	1.00614		18	1.00307	1.00987	1.00309
19	1.00896	1.01031	1.0057		19	1.0046	1.01285	1.0043
20	1.01072	1.01245	1.0075		20	1.00528	1.01053	1.00281
21	1.0082	1.01005	1.00756		21	1.00704	1.00962	1.00151
22	1.0129	1.0113	1.00835		22	1.00503	1.01111	1.00108
23	1.00842	1.01383	1.00642		23	1.00778	1.00656	1.00304
24	1.01295	1.01191	1.00451		24	1.00842	1.0121	1.0067
25	1.00825	1.00938	1.00561		25	1.00346	1.01089	1.00302
26	1.01108	1.01015	1.00871		26	1.00681	1.01249	1.00656
27	1.01137	1.01047	1.00709		27	1.00409	1.01253	1.0034
28	1.0111	1.00651	1.00466		28	1.00576	1.01051	1.00061
29	1.01089	1.00686	1.0071		29	1.00608	1.01032	1.00186
30	1.0053	1.01016	1.00399		30	1.00208	1.01251	1.00467
31	1.0064	1.00981	1.00469		31	1.00648	1.00627	1.00339
32	1.00383	1.00968	1.00273		32	1.00748	1.00691	1.00016
33	1.00761	1.00755	1.00123		33	1.00795	1.00692	1.00327
34	1.00892	1.00724	1.00355		34	1.0042	1.00624	0.997464
35	1.00718	1.00943	1.0041		35	1.00454	1.00649	1.00672
36	1.00572	1.01088	1.00515		36	1.00248	1.00508	1.00015
37	1.00485	1.00719	1.00808		37	1.00003	1.00965	0.9976
38	1.01138	1.00921	1.00398		38	1.00832	1.01285	0.999486
39	1.01068	1.00844	1.00363		39	1.00591	1.01069	1.00243
40	1.00275	1.00843	1.00458		40	1.00067	1.00516	1.00315
41	1.00751	1.00612	1.00455		41	0.998991	1.00953	1.00175
42	1.00726	1.00338	1.00957		42	1.00208	1.00677	1.00162
43	1.0083	1.00514	1.00361		43	1.00686	1.00611	1.00006
44	1.00371	1.00864	1.00404		44	1.00286	1.00747	1.00156
45	1.00557	1.00658	1.00234		45	1.00367	1.00529	1.00259
46	1.00717	1.00419	1.00254		46	1.00058	1.0081	0.999165
47	1.00811	1.00502	1.004		47	1.00176	1.00712	0.998616
48	1.00579	1.00777	1.00426		48	0.997766	1.00943	0.999836
49	1.00658	1.00642	1.00639		49	1.00717	1.0043	1.00176
50	1.00491	1.00439	1.00155		50	1.00329	1.00826	1.0032
51	1.00072	1.00438	1.00043		51	1.00355	1.00618	0.999574
52	1.00587	1.00599	1.00416		52	1.0055	1.00794	1.0015
53	1.00688	1.00572	0.997727		53	1.0053	1.00601	0.996391
54	1.00457	1.00514	1.00619		54	1.00595	1.00103	1.00358
55	1.00876	1.00468	1.0025		55	1.00142	1.00324	1.00205
56	1.00819	1.00374	1.00154		56	0.998713	1.00798	0.99819
57	1.0064	1.00277	1.00184		57	1.00222	1.00696	0.999701
58	1.00307	1.00243	1.00074		58	1.00128	1.00693	0.997216
59	1.01001	1.00487	1.00094		59	1.00071	1.00717	1.00312
60	1.00169	1.00599	1.00537		60	1.00099	1.00526	1.00126
61	1.00861	1.00041	1.00022		61	1.00045	1.01297	0.999056
62	1.00136	1.00616	1.00125		62	1.00171	1.00611	0.999559
63	0.998945	1.00454	1.00536		63	1.00149	1.00313	0.998174
64	1.00477	1.0087	0.999314		64	1.00344	1.00151	1.00131
65	1.00466	1.00371	1.00159		65	1.0022	1.00002	1.00061
66	1.00472	1.00214	1.0005		66	1.00251	1.00015	0.99781
67	1.00324	1.00341	1.00699		67	1.00021	1.00529	0.997332
68	1.00746	1.00367	0.999014		68	1.00401	1.00438	0.99962
69	1.00434	1.00384	0.997697		69	0.995877	1.0063	0.998541
70	0.998416	1.00254	1.00258		70	0.998759	1.00523	0.995133
71	1.00303	0.998332	1.00101		71	1.00297	1.00339	1.00143
72	1.00265	1.00028	0.997736		72	0.996078	1.00176	0.9964
73	0.999102	1.00168	1.00048		73	0.999619	1.00352	0.997207
74	1.0051	1.00143	1.00073		74	1.0007	1.00492	1.00214
75	1.0023	1.00208	1.0079		75	1.00202	1.0033	1.00132
76	1.00334	1.00351	1.00078		76	1.00079	1.00277	1.00017
77	1.00127	1.00348	0.999947		77	0.999839	1.00467	0.998518
78	1.00429	1.00474	0.999886		78	0.999832	1.00074	0.99557
79	1.00131	1.00009	1.00301		79	0.998128	1.00477	1.00006
80	0.999741	1.00093	0.999821		80	1.00146	1.00115	1.00009
81	0.99916	1.00196	0.998592		81	1.00123	0.996963	0.999057
82	0.996009	0.997845	1.00078		82	0.999428	1.00141	0.998298
83	1.00378	0.999859	1.00012		83	1.00048	1.00031	1.00389
84	1.00073	0.999921	1.00047		84	1.00118	0.999668	0.997774
85	1.00058	0.999488	1.00022		85	0.996217	1.0005	1.00089
86	1.00593	1.00148	1.0013		86	1.00072	1.00425	0.995493
87	1.00191	0.999164	1.00179		87	0.997169	0.999446	0.997968
88	0.998873	0.996642	0.996581		88	1.00152	1.00123	0.995846
89	1.00543	0.998305	0.998557		89	0.998059	0.999939	0.995907
90	0.998837	0.997436	0.99764		90	1.00116	1.00198	0.996796
91	1.00148	0.995797	1.00267		91	0.998296	1.00056	1.00085
92	0.997895	0.999003	0.99454		92	0.997049	1.00586	0.997731
93	1.0064	1.00224	0.999784		93	0.998164	1.00964	0.998227
94	1.00149	1.00024	1.00182		94	0.997627	1.00267	0.997972
95	1.00241	1.0327	0.99736		95	0.994376	1.00248	1.01524
96	1.04063	1.06588	1.03724		96	1.04498	1.03934	1.07597
97	1.10617	0.998772	1.0816		97	1.11602	1.08558	1.05875
98	1.03885	0.867013	0.960226		98	1.10699	0.982973	0.923811
99	0.959462	0.761912	0.820731		99	0.972223	0.885841	0.769214
100	0.879591	0.718124	0.754553		100	0.844722	0.733617	0.719237
101	0.862002	0.692873	0.720222		101	0.761239	0.688171	0.679893
102	0.84556	0.669389	0.698322		102	0.696412	0.640511	0.65264
103	0.835996	0.648611	0.678539		103	0.666164	0.607971	0.628399
104	0.826467	0.634016	0.665936		104	0.641139	0.579688	0.607789
105	0.817577	0.619475	0.652339		105	0.614834	0.55582	0.58577
106	0.804533	0.605459	0.636203		106	0.590456	0.535927	0.569209
107	0.795745	0.591445	0.625314		107	0.570032	0.511925	0.553559
108	0.789228	0.579805	0.613906		108	0.546075	0.492345	0.535126
109	0.781025	0.572043	0.603698		109	0.525802	0.478877	0.522521
110	0.770053	0.559535	0.594263		110	0.507621	0.46133	0.507657
111	0.763632	0.550517	0.586542		111	0.493162	0.448527	0.494143
112	0.760307	0.542044	0.57969		112	0.473378	0.431884	0.48398
113	0.755418	0.534214	0.570249		113	0.459872	0.424961	0.471471
114	0.742025	0.528951	0.566997		114	0.443578	0.414147	0.460157
115	0.738522	0.518696	0.560836		115	0.427919	0.398197	0.453389
116	0.737246	0.514741	0.555845		116	0.417624	0.393489	0.443424
117	0.729227	0.509689	0.549627		117	0.401151	0.381895	0.43429
118	0.726346	0.502929	0.542476		118	0.39301	0.37355	0.425433
119	0.719848	0.499744	0.5408		119	0.38244	0.364988	0.41774
120	0.713224	0.495361	0.537157		120	0.371329	0.357969	0.412173
121	0.712292	0.487549	0.532707		121	0.359179	0.34661	0.4057
122	0.706293	0.48568	0.52846		122	0.349657	0.341033	0.399948
123	0.704165	0.482145	0.527894		123	0.344469	0.333602	0.393031
124	0.697025	0.478071	0.523964		124	0.33447	0.32958	0.389988
125	0.695259	0.473253	0.521712		125	0.325543	0.32346	0.383147
126	0.691335	0.473411	0.517876		126	0.318983	0.316337	0.381371
127	0.689397	0.469887	0.513427		127	0.312921	0.314483	0.373287
128	0.686455	0.471909	0.512957		128	0.305084	0.307974	0.368757
129	0.682072	0.466921	0.509764		129	0.300845	0.305946	0.36488
130	0.677003	0.463884	0.509029		130	0.295454	0.300849	0.360619
131	0.67686	0.461134	0.508638		131	0.287951	0.297622	0.360187
132	0.671399	0.459699	0.503615		132	0.282811	0.29574	0.356875
133	0.670844	0.457341	0.50447		133	0.276987	0.289637	0.350547
134	0.668625	0.456253	0.503584		134	0.274488	0.288154	0.348848
135	0.665026	0.454563	0.503839		135	0.270594	0.283571	0.345201
136	0.662918	0.452732	0.500476		136	0.267768	0.281571	0.343344
137	0.660023	0.453952	0.497272		137	0.263495	0.278498	0.339092
138	0.660198	0.451253	0.498327		138	0.25874	0.276746	0.337324
139	0.655241	0.448693	0.497838		139	0.254936	0.274754	0.335879
140	0.653729	0.449392	0.498108		140	0.25104	0.272638	0.33395
141	0.651376	0.446406	0.49297		141	0.24798	0.270637	0.331832
142	0.651557	0.445503	0.493968		142	0.244557	0.267985	0.330325
143	0.651188	0.445287	0.493864		143	0.243208	0.270141	0.326595
144	0.649972	0.443618	0.492896		144	0.240107	0.263906	0.326005
145	0.645775	0.446825	0.492363		145	0.238956	0.262197	0.322132
146	0.644792	0.443793	0.49021		146	0.234743	0.260472	0.321713
147	0.644634	0.44203	0.489808		147	0.231807	0.260207	0.32132
148	0.645549	0.440543	0.489575		148	0.230697	0.261876	0.316636
149	0.642057	0.440686	0.486597		149	0.227123	0.25604	0.314332
150	0.637553	0.439373	0.48774		150	0.225001	0.25475	0.314829
151	0.636281	0.438944	0.486464		151	0.222942	0.254778	0.312218
152	0.635519	0.435676	0.486495		152	0.221626	0.254057	0.310685
153	0.633028	0.437199	0.486789		153	0.219782	0.252516	0.311043
154	0.635391	0.438793	0.486911		154	0.219635	0.250235	0.307728
155	0.630678	0.437	0.486312		155	0.216576	0.248255	0.308981
156	0.628644	0.43565	0.484853		156	0.215953	0.247303	0.30662
157	0.632032	0.434383	0.485012		157	0.214759	0.246009	0.304604
158	0.625866	0.432114	0.480766		158	0.21187	0.246495	0.303119
159	0.626402	0.439427	0.483056		159	0.211141	0.243785	0.301012
160	0.624072	0.433777	0.483899		160	0.209229	0.241566	0.299652
161	0.622433	0.434636	0.483702		161	0.208182	0.242243	0.299426
162	0.622518	0.432509	0.481416		162	0.204489	0.240769	0.298162
163	0.623154	0.431466	0.481406		163	0.204357	0.23947	0.29811
164	0.620885	0.430191	0.480054		164	0.202494	0.238761	0.297778
165	0.619703	0.433241	0.481376		165	0.202451	0.238899	0.297067
166	0.617262	0.429494	0.482238		166	0.200776	0.235936	0.293674
167	0.620134	0.428598	0.480736		167	0.20109	0.235834	0.291688
168	0.616618	0.429504	0.478667		168	0.199436	0.237505	0.291556
169	0.616409	0.42933	0.477649		169	0.197425	0.233422	0.290996
170	0.61457	0.428626	0.477817		170	0.19652	0.234757	0.291724
171	0.617366	0.427542	0.477672		171	0.195519	0.233363	0.289742
172	0.615214	0.429283	0.47676		172	0.193623	0.230937	0.288421
173	0.610002	0.432082	0.474168		173	0.193896	0.231921	0.287402
174	0.613741	0.425289	0.477156		174	0.193199	0.231211	0.284963
175	0.609011	0.426903	0.475869		175	0.190609	0.229314	0.285036
176	0.610487	0.428048	0.475115		176	0.190876	0.227621	0.283393
177	0.608431	0.428515	0.476556		177	0.189269	0.228668	0.28436
178	0.608382	0.427528	0.473576		178	0.188488	0.228678	0.282488
179	0.605735	0.42624	0.476529		179	0.18691	0.227638	0.28099
180	0.605562	0.427118	0.476349		180	0.188219	0.225323	0.280371
181	0.605844	0.427831	0.475877		181	0.188121	0.22468	0.280113
182	0.606217	0.424601	0.473229		182	0.185547	0.224815	0.27846
183	0.607843	0.42293	0.473783		183	0.185027	0.224207	0.278698
184	0.602477	0.42597	0.475421		184	0.184524	0.224957	0.277587
185	0.601283	0.425232	0.473495		185	0.184413	0.223387	0.275918
186	0.600779	0.422183	0.473		186	0.181373	0.222282	0.276801
187	0.600226	0.42364	0.472822		187	0.183315	0.221573	0.275761
188	0.600508	0.422769	0.473224		188	0.180742	0.221432	0.273662
189	0.598717	0.424822	0.472848		189	0.1798	0.220685	0.274214
190	0.600411	0.424657	0.471782		190	0.180699	0.219986	0.273358
191	0.596431	0.424449	0.473288		191	0.179529	0.219266	0.273029
192	0.596974	0.421824	0.471943		192	0.180024	0.220776	0.27273
193	0.596299	0.421712	0.469619		193	0.177489	0.218011	0.270273
194	0.598544	0.419002	0.470693		194	0.177711	0.217626	0.273619
195	0.592473	0.420644	0.468699		195	0.175535	0.21658	0.269928
196	0.595132	0.419873	0.47028		196	0.175784	0.217302	0.270243
197	0.59213	0.420851	0.468854		197	0.175035	0.217885	0.270406
198	0.593785	0.419288	0.468491		198	0.175153	0.215222	0.268919
199	0.591924	0.419751	0.469249		199	0.173964	0.216947	0.268376
200	0.594916	0.420083	0.468802		200	0.173891	0.214397	0.265886
201	0.592864	0.419343	0.469508		201	0.172237	0.214723	0.265666
202	0.591478	0.419058	0.470427		202	0.173894	0.21518	0.264816
203	0.592267	0.419565	0.46668		203	0.172578	0.21394	0.265127
204	0.592617	0.419537	0.466152		204	0.17217	0.213017	0.265069
205	0.586781	0.419402	0.467744		205	0.170734	0.213546	0.2639
206	0.590609	0.417735	0.466919		206	0.172026	0.212573	0.262825
207	0.587413	0.415815	0.466276		207	0.16973	0.212432	0.261551
208	0.588987	0.417071	0.466119		208	0.169811	0.21027	0.262662
209	0.588242	0.418576	0.464886		209	0.169015	0.209689	0.262187
210	0.588112	0.416437	0.467348		210	0.169577	0.210081	0.259578
211	0.588651	0.416291	0.466585		211	0.169482	0.209119	0.260763
212	0.587501	0.414256	0.464662		212	0.170106	0.207094	0.259622
213	0.584782	0.415729	0.462592		213	0.164981	0.20835	0.258777
214	0.587192	0.414771	0.463548		214	0.166288	0.207487	0.258362
215	0.582659	0.414926	0.463315		215	0.165981	0.206252	0.257186
216	0.582258	0.414614	0.466598		216	0.165523	0.206468	0.257321
217	0.586374	0.414907	0.464773		217	0.166089	0.206862	0.256151
218	0.58079	0.415294	0.461844		218	0.165079	0.206501	0.25692
219	0.584638	0.413208	0.464643		219	0.16556	0.206603	0.258108
220	0.582417	0.413772	0.464683		220	0.165133	0.204736	0.255343
221	0.58156	0.413681	0.463734		221	0.16458	0.203443	0.254958
222	0.577371	0.413519	0.464283		222	0.163985	0.205709	0.252498
223	0.581413	0.412829	0.461968		223	0.162298	0.205648	0.253993
224	0.581894	0.412908	0.46374		224	0.161832	0.204123	0.252669
225	0.580383	0.411742	0.462684		225	0.161513	0.20347	0.252371
226	0.578981	0.410709	0.462497		226	0.162626	0.203344	0.252187
227	0.578708	0.412028	0.462583		227	0.162411	0.203517	0.250901
228	0.57988	0.411904	0.460938		228	0.161365	0.204193	0.25044
229	0.576467	0.411353	0.460281		229	0.160547	0.202769	0.250112
230	0.577631	0.410329	0.460467		230	0.161199	0.202651	0.251767
231	0.578905	0.411098	0.459563		231	0.159513	0.202061	0.250682
232	0.575496	0.410338	0.460379		232	0.159852	0.200945	0.251065
233	0.576195	0.410794	0.459073		233	0.159359	0.19923	0.249706
234	0.574604	0.411346	0.463898		234	0.159089	0.199166	0.249412
235	0.573621	0.41146	0.45926		235	0.158124	0.199482	0.248364
236	0.573879	0.408264	0.457926		236	0.157497	0.199589	0.247938
237	0.577851	0.406689	0.459821		237	0.158155	0.200052	0.248242
238	0.57354	0.408405	0.459085		238	0.157009	0.199554	0.247816
239	0.572627	0.407092	0.458693		239	0.156505	0.197967	0.24607
240	0.574612	0.408244	0.457253		240	0.157436	0.199184	0.247336
241	0.572708	0.407029	0.458967		241	0.157038	0.197381	0.246187
242	0.571672	0.40805	0.457447		242	0.15704	0.198446	0.245631
243	0.572713	0.406425	0.455194		243	0.156605	0.198216	0.245755
244	0.572004	0.40789	0.458732		244	0.154968	0.197219	0.244515
245	0.571104	0.407882	0.458504		245	0.15585	0.196896	0.244465
246	0.568713	0.408542	0.455477		246	0.15492	0.196049	0.243488
247	0.572443	0.406624	0.456841		247	0.154888	0.195538	0.242824
248	0.570251	0.408692	0.459589		248	0.155101	0.196513	0.241665
249	0.569423	0.40639	0.457215		249	0.154161	0.196466	0.243606
250	0.569874	0.405458	0.455438		250	0.152908	0.199419	0.24141
251	0.571148	0.408179	0.457185		251	0.154446	0.194254	0.242107
252	0.56642	0.405097	0.455261		252	0.152341	0.194946	0.241274
253	0.570709	0.408154	0.454206		253	0.152736	0.194981	0.240348
254	0.565927	0.404278	0.455379		254	0.152212	0.194251	0.239284
255	0.567087	0.403757	0.455098		255	0.151759	0.193306	0.237767
256	0.566108	0.406372	0.453551		256	0.151752	0.193906	0.239995
257	0.567676	0.407011	0.454605		257	0.151874	0.19323	0.239528
258	0.567528	0.405043	0.453432		258	0.151144	0.193376	0.239154
259	0.566864	0.404845	0.45274		259	0.150631	0.193564	0.23846
260	0.562998	0.404369	0.45499		260	0.150709	0.192667	0.237553
261	0.563921	0.403408	0.454586		261	0.149886	0.192818	0.238153
262	0.565125	0.403482	0.4543		262	0.149967	0.191657	0.237513
263	0.564747	0.402336	0.452047		263	0.150456	0.190437	0.237899
264	0.566102	0.402821	0.452474		264	0.149574	0.191214	0.235909
265	0.565102	0.404825	0.453255		265	0.149721	0.190261	0.236483
266	0.563002	0.403673	0.454077		266	0.148983	0.189835	0.236278
267	0.562022	0.403089	0.451465		267	0.149957	0.190042	0.236664
268	0.563644	0.402187	0.453022		268	0.148966	0.190717	0.236385
269	0.565914	0.40048	0.453123		269	0.148126	0.190785	0.234399
270	0.560817	0.401698	0.454471		270	0.147854	0.189548	0.234691
271	0.562052	0.400985	0.450204		271	0.149244	0.191184	0.233735
272	0.561677	0.403186	0.451019		272	0.146334	0.188381	0.235038
273	0.564478	0.401296	0.451364		273	0.147967	0.188521	0.23273
274	0.559865	0.402091	0.452226		274	0.146826	0.188347	0.233202
275	0.56026	0.403497	0.452674		275	0.147886	0.18866	0.232477
276	0.55973	0.399834	0.451048		276	0.147174	0.187296	0.232784
277	0.557674	0.399991	0.451222		277	0.146871	0.188692	0.231937
278	0.558762	0.400772	0.45016		278	0.14562	0.188057	0.231547
279	0.561337	0.400903	0.452006		279	0.146803	0.190154	0.231405
280	0.557354	0.39928	0.449876		280	0.146345	0.186091	0.231332
281	0.558228	0.399075	0.451886		281	0.145758	0.187626	0.229538
282	0.557488	0.400264	0.45018		282	0.146148	0.187647	0.230868
283	0.559101	0.398756	0.449272		283	0.144826	0.187371	0.228678
284	0.559256	0.400045	0.451356		284	0.145702	0.186138	0.229146
285	0.560245	0.397076	0.448286		285	0.144988	0.185501	0.228899
286	0.557053	0.399478	0.448424		286	0.144651	0.185827	0.229204
287	0.556428	0.398198	0.448843		287	0.144036	0.184578	0.227489
288	0.556575	0.397519	0.448047		288	0.143095	0.184505	0.229531
289	0.555186	0.398892	0.448741		289	0.144384	0.185707	0.228881
290	0.554077	0.398438	0.447924		290	0.143783	0.184652	0.228854
291	0.555442	0.40072	0.449383		291	0.14383	0.1836	0.229259
292	0.556391	0.397571	0.448059		292	0.143728	0.183342	0.227597
293	0.55558	0.397221	0.446958		293	0.143257	0.184589	0.226098
294	0.555016	0.396932	0.448054		294	0.14236	0.18496	0.226539
295	0.553313	0.395003	0.447735		295	0.142568	0.182801	0.226696
296	0.553705	0.395978	0.446937		296	0.143499	0.183592	0.226125
297	0.554341	0.39685	0.444302		297	0.14174	0.182603	0.226169
298	0.554514	0.397669	0.44579		298	0.143561	0.183249	0.22539
299	0.553546	0.398252	0.44694		299	0.142805	0.184433	0.224427
300	0.553769	0.398662	0.446733		300	0.141544	0.183171	0.224245
301	0.553204	0.397471	0.443881		301	0.140279	0.182544	0.225923
302	0.552323	0.395492	0.445811		302	0.141135	0.18206	0.223857
303	0.552689	0.397302	0.445051		303	0.140597	0.183421	0.223518
304	0.551346	0.393874	0.446901		304	0.140605	0.182218	0.223618
305	0.553547	0.395632	0.444872		305	0.141085	0.180989	0.223976
306	0.552484	0.392342	0.446051		306	0.141438	0.181899	0.222878
307	0.552127	0.39445	0.445058		307	0.14073	0.181602	0.223333
308	0.552081	0.394404	0.445898		308	0.140403	0.181132	0.222196
309	0.551636	0.392887	0.4455		309	0.140623	0.180704	0.222721
310	0.548871	0.393615	0.445783		310	0.139314	0.180604	0.2223
311	0.548447	0.394208	0.444823		311	0.140335	0.179434	0.221933
312	0.551263	0.395378	0.444602		312	0.139273	0.179911	0.221838
313	0.551793	0.392701	0.44522		313	0.140076	0.179881	0.22073
314	0.552217	0.391566	0.445665		314	0.138871	0.180385	0.221731
315	0.548972	0.393202	0.442389		315	0.138648	0.180125	0.220853
316	0.546635	0.392609	0.443754		316	0.138417	0.179676	0.220682
317	0.551028	0.39408	0.444623		317	0.138784	0.180148	0.221811
318	0.549875	0.393354	0.443575		318	0.137968	0.179762	0.220394
319	0.549539	0.393434	0.444714		319	0.138298	0.178019	0.219813
320	0.551552	0.392538	0.444427		320	0.138303	0.179412	0.219967
321	0.54725	0.39258	0.442222		321	0.137043	0.17715	0.219236
322	0.547386	0.392411	0.4408		322	0.13837	0.178295	0.219357
323	0.545927	0.392869	0.4425		323	0.1388	0.178147	0.218769
324	0.547545	0.390365	0.442595		324	0.136995	0.18033	0.21802
325	0.548228	0.390972	0.442291		325	0.136931	0.175948	0.217924
326	0.546188	0.392496	0.441333		326	0.137318	0.177512	0.218449
327	0.546647	0.392294	0.441255		327	0.137217	0.175987	0.216696
328	0.546115	0.391422	0.441199		328	0.136394	0.176072	0.218013
329	0.547212	0.391025	0.442052		329	0.135207	0.176487	0.216869
330	0.543636	0.392391	0.441034		330	0.134861	0.177638	0.218195
331	0.545432	0.387656	0.442653		331	0.136793	0.176232	0.215991
332	0.546196	0.389536	0.441184		332	0.135209	0.176002	0.216204
333	0.544517	0.393198	0.440613		333	0.13654	0.176068	0.215871
334	0.544169	0.390597	0.440271		334	0.136158	0.176471	0.215386
335	0.546058	0.38874	0.439299		335	0.136317	0.175758	0.217211
336	0.545177	0.387764	0.440111		336	0.135968	0.176971	0.215716
337	0.542675	0.388902	0.4416		337	0.13543	0.175902	0.215182
338	0.545828	0.389568	0.438762		338	0.135744	0.176501	0.214329
339	0.542853	0.389769	0.439113		339	0.135362	0.175592	0.214513
340	0.545756	0.38995	0.44071		340	0.13605	0.174274	0.214587
341	0.542595	0.38842	0.440821		341	0.135043	0.174975	0.214604
342	0.543845	0.387939	0.438882		342	0.135124	0.174189	0.214208
343	0.546522	0.388551	0.43885		343	0.134016	0.17497	0.213469
344	0.540997	0.387041	0.439963		344	0.134686	0.173836	0.21243
345	0.541857	0.387723	0.440431		345	0.133893	0.173621	0.213585
346	0.54082	0.387453	0.439057		346	0.133388	0.172383	0.212706
347	0.53887	0.388881	0.438956		347	0.134123	0.173152	0.213176
348	0.543112	0.386517	0.439227		348	0.136204	0.174073	0.213738
349	0.540188	0.386628	0.438844		349	0.134155	0.172318	0.212775
350	0.541809	0.386596	0.436747		350	0.133692	0.17295	0.211503
351	0.541022	0.385595	0.438349		351	0.132284	0.173643	0.212477
352	0.541408	0.385833	0.437341		352	0.132832	0.174216	0.211886
353	0.541483	0.386884	0.437193		353	0.132778	0.172182	0.211852
354	0.540001	0.386466	0.436331		354	0.13369	0.17276	0.21153
355	0.541056	0.38718	0.436145		355	0.132498	0.170925	0.210926
356	0.538267	0.386772	0.435119		356	0.132421	0.17136	0.209937
357	0.539512	0.386554	0.437267		357	0.132098	0.172462	0.211063
358	0.540711	0.38751	0.436521		358	0.132209	0.170997	0.20981
359	0.540945	0.386194	0.437333		359	0.132229	0.172622	0.209037
360	0.539322	0.386645	0.437416		360	0.132852	0.170847	0.209919
361	0.536568	0.385561	0.434623		361	0.131249	0.170975	0.209793
362	0.53798	0.385527	0.438052		362	0.131142	0.172287	0.20979
363	0.541004	0.386182	0.438078		363	0.132362	0.172706	0.20895
364	0.539705	0.385434	0.436244		364	0.130272	0.16958	0.209268
365	0.537578	0.384799	0.435945		365	0.131996	0.170408	0.208721
366	0.539465	0.383029	0.435351		366	0.131244	0.170472	0.208995
367	0.536885	0.384375	0.43691		367	0.130572	0.170107	0.208346
368	0.538429	0.382545	0.436104		368	0.130633	0.169494	0.207697
369	0.53594	0.384456	0.436381		369	0.131835	0.169448	0.207786
370	0.536529	0.381058	0.435899		370	0.129973	0.169712	0.208367
371	0.535165	0.382903	0.437057		371	0.130625	0.170355	0.207257
372	0.535529	0.385141	0.434273		372	0.13069	0.169198	0.207216
373	0.536366	0.382165	0.436627		373	0.130484	0.169218	0.207719
374	0.534989	0.382937	0.43452		374	0.131226	0.169405	0.207553
375	0.534839	0.38289	0.436605		375	0.129901	0.168308	0.2067
376	0.534937	0.383374	0.434512		376	0.129867	0.167976	0.206319
377	0.535386	0.383651	0.434501		377	0.130662	0.16693	0.206652
378	0.53701	0.382211	0.433214		378	0.129815	0.167547	0.206381
379	0.535206	0.384861	0.434196		379	0.129469	0.168506	0.205575
380	0.534577	0.383375	0.433626		380	0.129558	0.169783	0.206301
381	0.534848	0.382891	0.434903		381	0.129577	0.168193	0.20646
382	0.534515	0.384592	0.434705		382	0.128192	0.167572	0.205466
383	0.53335	0.382374	0.433827		383	0.128524	0.167686	0.205288
384	0.535158	0.382341	0.435702		384	0.128767	0.168359	0.204705
385	0.536094	0.382281	0.432583		385	0.1285	0.168129	0.205529
386	0.535814	0.380251	0.434847		386	0.128229	0.166925	0.206082
387	0.533239	0.379933	0.432895		387	0.128741	0.167591	0.204305
388	0.534488	0.381865	0.43382		388	0.129018	0.166907	0.204025
389	0.534715	0.381443	0.432083		389	0.12875	0.169283	0.20419
390	0.533251	0.379866	0.432777		390	0.128375	0.166902	0.203298
391	0.532105	0.38074	0.430543		391	0.127793	0.16589	0.204184
392	0.531542	0.381802	0.430587		392	0.127774	0.166715	0.203471
393	0.533398	0.37898	0.431526		393	0.127656	0.165903	0.204874
394	0.531729	0.380871	0.430703		394	0.12692	0.165028	0.20271
395	0.528953	0.37841	0.429653		395	0.128154	0.165698	0.201812
396	0.532402	0.379408	0.431797		396	0.127281	0.164383	0.201899
397	0.529984	0.378953	0.432463		397	0.127829	0.166254	0.202455
398	0.531825	0.380775	0.431945		398	0.126624	0.166852	0.203728
399	0.531913	0.379746	0.432408		399	0.127367	0.163897	0.203496
400	0.529888	0.379017	0.432188		400	0.127011	0.165333	0.20244
401	0.531346	0.379068	0.430955		401	0.12736	0.164891	0.201895
402	0.53365	0.380232	0.430996		402	0.128549	0.167419	0.201099
403	0.529547	0.379567	0.43068		403	0.127192	0.164983	0.201259
404	0.528965	0.377316	0.430645		404	0.126724	0.16483	0.201077
405	0.529999	0.37777	0.430206		405	0.126094	0.163777	0.200868
406	0.529855	0.378515	0.431515		406	0.127292	0.163853	0.200538
407	0.528883	0.379742	0.430366		407	0.127346	0.165024	0.200803
408	0.527352	0.378119	0.429934		408	0.125853	0.164156	0.19962
409	0.530534	0.37661	0.430654		409	0.125313	0.16426	0.199576
410	0.529152	0.376903	0.428365		410	0.125502	0.164194	0.199753
411	0.531763	0.376252	0.429236		411	0.125006	0.163682	0.201113
412	0.527717	0.37839	0.42952		412	0.125155	0.162657	0.201368
413	0.528266	0.37675	0.430745		413	0.128489	0.163883	0.20013
414	0.530168	0.376998	0.427358		414	0.126025	0.163207	0.198587
415	0.529294	0.377851	0.429617		415	0.125528	0.162659	0.198316
416	0.531423	0.377621	0.429551		416	0.125502	0.163142	0.199684
417	0.527667	0.376997	0.429637		417	0.124954	0.161989	0.198481
418	0.526971	0.378423	0.42784		418	0.12513	0.163301	0.198231
419	0.526137	0.377372	0.428138		419	0.125407	0.164236	0.198608
420	0.524828	0.375421	0.427968		420	0.125463	0.163292	0.198598
421	0.528803	0.375753	0.427486		421	0.125325	0.16241	0.19899
422	0.527772	0.374413	0.429664		422	0.125418	0.16205	0.196937
423	0.528361	0.376648	0.429371		423	0.12481	0.162569	0.198428
424	0.526513	0.376657	0.427356		424	0.125231	0.161221	0.197648
425	0.529446	0.374286	0.429664		425	0.124909	0.163388	0.196986
426	0.524748	0.374138	0.424675		426	0.123323	0.161218	0.197472
427	0.525472	0.375874	0.427543		427	0.124437	0.161051	0.196788
428	0.525669	0.375723	0.427336		428	0.124522	0.160755	0.197164
429	0.526255	0.374431	0.427417		429	0.12417	0.161328	0.196587
430	0.525087	0.374642	0.428006		430	0.12378	0.160893	0.197522
431	0.528033	0.375524	0.427414		431	0.124014	0.160731	0.197623
432	0.525669	0.375279	0.426516		432	0.12372	0.160816	0.196522
433	0.524964	0.371446	0.427877		433	0.124056	0.161306	0.194467
434	0.525408	0.375018	0.427668		434	0.123886	0.160358	0.19638
435	0.526543	0.37351	0.427084		435	0.123692	0.161668	0.195729
436	0.524939	0.373692	0.425143		436	0.123209	0.161726	0.196092
437	0.523381	0.373131	0.426784		437	0.123312	0.161852	0.195441
438	0.523046	0.376296	0.426186		438	0.123577	0.159838	0.195743
439	0.524588	0.374782	0.426096		439	0.124998	0.16013	0.19538
440	0.52233	0.373322	0.426481		440	0.123241	0.159044	0.19488
441	0.523428	0.37313	0.425936		441	0.123013	0.160118	0.195252
442	0.523676	0.372695	0.423941		442	0.123879	0.159165	0.194584
443	0.520673	0.37207	0.42504		443	0.122443	0.159223	0.195612
444	0.522497	0.377066	0.424514		444	0.123518	0.160074	0.194774
445	0.523246	0.373033	0.425836		445	0.124178	0.159545	0.194577
446	0.524481	0.372537	0.42482		446	0.121801	0.159205	0.193947
447	0.526339	0.374401	0.427171		447	0.122532	0.160313	0.193149
448	0.520659	0.372141	0.423854		448	0.122197	0.159031	0.194796
449	0.524097	0.373368	0.423886		449	0.121316	0.158974	0.193393
450	0.524706	0.371619	0.422984		450	0.121848	0.15899	0.193953
451	0.521847	0.370323	0.423701		451	0.121415	0.159445	0.193291
452	0.520487	0.372817	0.424051		452	0.121161	0.157942	0.192644
453	0.520372	0.369999	0.423466		453	0.120833	0.158045	0.192731
454	0.523708	0.370246	0.424127		454	0.122582	0.158766	0.193948
455	0.521912	0.373235	0.424068		455	0.122998	0.157524	0.193247
456	0.521256	0.372426	0.423767		456	0.120646	0.157908	0.192378
457	0.52262	0.37239	0.422794		457	0.121237	0.158175	0.192726
458	0.520295	0.373221	0.424667		458	0.121416	0.157481	0.192694
459	0.518934	0.372284	0.423609		459	0.119584	0.156918	0.192409
460	0.521184	0.369618	0.423909		460	0.121542	0.15792	0.192809
461	0.51991	0.369865	0.422795		461	0.119805	0.156662	0.192368
462	0.519914	0.369788	0.423374		462	0.121139	0.157294	0.191925
463	0.519805	0.371218	0.422209		463	0.120342	0.158081	0.191779
464	0.521515	0.370611	0.422412		464	0.120419	0.156392	0.190878
465	0.522149	0.37015	0.420801		465	0.121861	0.156229	0.192805
466	0.52063	0.368938	0.423239		466	0.120467	0.156741	0.191706
467	0.51962	0.369236	0.420858		467	0.120856	0.156568	0.19055
468	0.519827	0.369157	0.421742		468	0.120574	0.156894	0.191854
469	0.517963	0.371892	0.422526		469	0.120679	0.15613	0.190384
470	0.520268	0.368406	0.423658		470	0.120604	0.155937	0.190308
471	0.519491	0.369047	0.424011		471	0.119538	0.155797	0.19058
472	0.518818	0.367364	0.422311		472	0.119604	0.155511	0.190543
473	0.520429	0.371795	0.420628		473	0.120379	0.154669	0.189896
474	0.518277	0.37057	0.422264		474	0.119609	0.155527	0.18923
475	0.517044	0.368654	0.422691		475	0.119841	0.155801	0.189034
476	0.51829	0.369324	0.420133		476	0.120591	0.156344	0.189582
477	0.51971	0.368993	0.421389		477	0.119797	0.15464	0.190908
478	0.519936	0.367528	0.420846		478	0.119938	0.155514	0.189084
479	0.516282	0.367419	0.419989		479	0.118548	0.157448	0.188298
480	0.517831	0.367601	0.420544		480	0.118705	0.154434	0.18862
481	0.5175	0.368086	0.42126		481	0.119614	0.155585	0.188726
482	0.517397	0.367756	0.420424		482	0.118924	0.15395	0.188348
483	0.516689	0.367774	0.420472		483	0.120162	0.155923	0.188513
484	0.517518	0.366363	0.421642		484	0.118367	0.155434	0.188683
485	0.51685	0.366988	0.419634		485	0.119421	0.154583	0.187532
486	0.516087	0.367435	0.421706		486	0.11915	0.153921	0.187523
487	0.515703	0.367203	0.421228		487	0.117887	0.154501	0.186247
488	0.513651	0.367587	0.42033		488	0.118623	0.155222	0.187322
489	0.515823	0.367637	0.418486		489	0.119034	0.154001	0.186607
490	0.518368	0.366908	0.420239		490	0.11847	0.153268	0.186356
491	0.518928	0.369057	0.42036		491	0.118057	0.153558	0.187053
492	0.51748	0.366858	0.420447		492	0.119062	0.15296	0.186067
493	0.515449	0.365927	0.418897		493	0.117883	0.154609	0.187267
494	0.516102	0.364476	0.419655		494	0.11779	0.154196	0.188493
495	0.516242	0.366212	0.41802		495	0.1185	0.153861	0.187788
496	0.514991	0.364476	0.419161		496	0.117724	0.153966	0.185962
497	0.516509	0.366233	0.417717		497	0.11829	0.154651	0.18654
498	0.515419	0.364049	0.419161		498	0.117523	0.154382	0.185532
499	0.514961	0.367982	0.419215		499	0.11747	0.152918	0.186872
500	0.516839	0.369237	0.418977		500	0.117162	0.153647	0.186331
501	0.515437	0.366427	0.418097		501	0.117925	0.152626	0.185252
502	0.514531	0.36491	0.418697		502	0.118174	0.153307	0.186234
503	0.515739	0.362673	0.41847		503	0.117436	0.153344	0.185741
504	0.515491	0.363635	0.417379		504	0.117502	0.152093	0.185502
505	0.513436	0.366609	0.414906		505	0.117398	0.153186	0.186274
506	0.514629	0.365949	0.418458		506	0.117287	0.152107	0.185564
507	0.513013	0.364101	0.416798		507	0.116684	0.15102	0.185386
508	0.513054	0.36232	0.417311		508	0.116807	0.151958	0.184209
509	0.515325	0.366037	0.418835		509	0.116996	0.15317	0.184845
510	0.516176	0.3674	0.416769		510	0.116974	0.152967	0.185196
511	0.514716	0.362244	0.416445		511	0.117563	0.151661	0.184524
512	0.51531	0.364764	0.417302		512	0.116109	0.151884	0.184691
513	0.512699	0.362224	0.417863		513	0.115817	0.151161	0.185013
514	0.512461	0.363268	0.417338		514	0.11616	0.1529	0.18363
515	0.514272	0.363566	0.415349		515	0.115796	0.152456	0.184807
516	0.513697	0.361524	0.416015		516	0.116816	0.151946	0.183999
517	0.511535	0.366492	0.415964		517	0.116661	0.15115	0.183718
518	0.512285	0.363134	0.415816		518	0.116773	0.15112	0.183585
519	0.511639	0.362594	0.415864		519	0.115277	0.151018	0.184173
520	0.51169	0.361824	0.416318		520	0.116098	0.151864	0.18375
521	0.51367	0.361844	0.416152		521	0.116169	0.150497	0.182884
522	0.513436	0.362598	0.417146		522	0.115516	0.152233	0.181951
523	0.511429	0.362368	0.414964		523	0.115495	0.15068	0.182407
524	0.51008	0.361831	0.415755		524	0.115207	0.150005	0.183476
525	0.508894	0.363076	0.414432		525	0.115592	0.150612	0.183999
526	0.50794	0.362188	0.415738		526	0.115393	0.14999	0.182892
527	0.510687	0.361679	0.415358		527	0.115472	0.150186	0.18297
528	0.510596	0.363379	0.415575		528	0.115473	0.150041	0.18263
529	0.512067	0.360198	0.416692		529	0.114437	0.150436	0.182147
530	0.512614	0.363855	0.415338		530	0.115414	0.150832	0.181871
531	0.508922	0.363251	0.415601		531	0.114422	0.149276	0.182378
532	0.509566	0.361025	0.414804		532	0.113935	0.149774	0.181142
533	0.510832	0.360618	0.415149		533	0.116137	0.14985	0.181644
534	0.511734	0.359995	0.414926		534	0.11417	0.148747	0.182363
535	0.509707	0.36224	0.413392		535	0.114339	0.149488	0.180432
536	0.509595	0.362715	0.41425		536	0.115002	0.150856	0.181269
537	0.512855	0.361126	0.412518		537	0.114347	0.150448	0.180764
538	0.510617	0.360907	0.412636		538	0.114361	0.149172	0.180985
539	0.509526	0.360445	0.417248		539	0.114708	0.14907	0.181276
540	0.510947	0.36203	0.412664		540	0.113889	0.148746	0.18115
541	0.508367	0.35947	0.414037		541	0.114228	0.149754	0.18046
542	0.509231	0.36123	0.412809		542	0.114159	0.149237	0.180349
543	0.509334	0.361489	0.410559		543	0.114532	0.149275	0.180247
544	0.508865	0.358225	0.412574		544	0.114186	0.148335	0.181575
545	0.51091	0.359728	0.413531		545	0.113497	0.148495	0.180644
546	0.508874	0.35862	0.413264		546	0.114564	0.147795	0.180799
547	0.508125	0.362693	0.414077		547	0.113828	0.149053	0.180053
548	0.509371	0.359762	0.411972		548	0.113228	0.148926	0.180192
549	0.505609	0.35965	0.414395		549	0.113209	0.148414	0.179875
550	0.50722	0.359696	0.410948		550	0.11329	0.149321	0.178985
551	0.508195	0.359982	0.411917		551	0.113706	0.148652	0.17998
552	0.506556	0.357344	0.413194		552	0.113104	0.149073	0.179361
553	0.506562	0.357736	0.414209		553	0.113859	0.147965	0.178607
554	0.508953	0.358573	0.412433		554	0.114091	0.148519	0.178455
555	0.505989	0.358154	0.411284		555	0.113756	0.147422	0.179002
556	0.504324	0.358686	0.414484		556	0.113501	0.146948	0.179181
557	0.506939	0.355991	0.414511		557	0.113847	0.147312	0.178574
558	0.508352	0.359179	0.412367		558	0.114396	0.146976	0.178777
559	0.506277	0.356062	0.409239		559	0.113093	0.147129	0.178931
560	0.506079	0.357556	0.410882		560	0.112761	0.147795	0.179094
561	0.505408	0.358231	0.410454		561	0.112448	0.146777	0.179837
562	0.506687	0.358427	0.410994		562	0.11329	0.146574	0.177647
563	0.505947	0.357242	0.411883		563	0.112685	0.147609	0.17842
564	0.507201	0.357669	0.412076		564	0.112445	0.148205	0.178554
565	0.50973	0.358151	0.413335		565	0.112546	0.148191	0.176859
566	0.505588	0.356006	0.413171		566	0.112463	0.145918	0.177668
567	0.505691	0.357448	0.410969		567	0.112481	0.14641	0.178092
568	0.508078	0.358044	0.41074		568	0.112734	0.146351	0.177677
569	0.504304	0.354404	0.411273		569	0.113383	0.145737	0.178199
570	0.505724	0.356728	0.409322		570	0.111566	0.146207	0.178084
571	0.503963	0.356887	0.410972		571	0.1119	0.146126	0.177121
572	0.507084	0.355487	0.411769		572	0.11288	0.146243	0.176601
573	0.504436	0.356915	0.409904		573	0.112972	0.145397	0.177619
574	0.505427	0.355896	0.41028		574	0.111916	0.145464	0.176736
575	0.505275	0.356506	0.409448		575	0.111152	0.146066	0.175842
576	0.503255	0.354664	0.410905		576	0.111166	0.146435	0.177272
577	0.503633	0.355828	0.409317		577	0.112222	0.145824	0.176241
578	0.504967	0.356936	0.410212		578	0.110432	0.145905	0.177901
579	0.505077	0.356409	0.410141		579	0.111198	0.146	0.175615
580	0.505156	0.354122	0.410888		580	0.111425	0.145254	0.176299
581	0.50306	0.354352	0.408038		581	0.111604	0.145825	0.176407
582	0.502341	0.354285	0.408685		582	0.110746	0.144879	0.176898
583	0.503521	0.356963	0.409828		583	0.110956	0.144734	0.177083
584	0.50215	0.354272	0.408924		584	0.111501	0.145076	0.175424
585	0.503429	0.355452	0.408403		585	0.111296	0.145797	0.175828
586	0.505706	0.355004	0.410344		586	0.110637	0.145119	0.176113
587	0.506607	0.353594	0.407665		587	0.111428	0.144997	0.175636
588	0.504673	0.355927	0.409177		588	0.110755	0.144923	0.176987
589	0.502271	0.354634	0.407704		589	0.111319	0.144536	0.175115
590	0.501537	0.355173	0.409087		590	0.110803	0.145199	0.174459
591	0.503857	0.353685	0.406918		591	0.110211	0.145191	0.17425
592	0.503509	0.356227	0.408175		592	0.110304	0.145331	0.174848
593	0.504897	0.352921	0.408629		593	0.111171	0.14383	0.174981
594	0.501889	0.354793	0.408646		594	0.111176	0.144366	0.174169
595	0.503634	0.352968	0.40823		595	0.111019	0.144316	0.174492
596	0.502599	0.352278	0.407717		596	0.11052	0.143327	0.174656
597	0.50152	0.353408	0.408276		597	0.110883	0.143784	0.17469
598	0.501551	0.352276	0.408647		598	0.11044	0.143678	0.174293
599	0.502062	0.352282	0.40872		599	0.109762	0.143782	0.174811
600	0.499067	0.352068	0.411974		600	0.109758	0.142481	0.174777
	#DIV/0!	#DIV/0!	#DIV/0!			#DIV/0!	#DIV/0!	#DIV/0!
	#DIV/0!	#DIV/0!	#DIV/0!			#DIV/0!	#DIV/0!	#DIV/0!
	#DIV/0!	#DIV/0!	#DIV/0!			#DIV/0!	#DIV/0!	#DIV/0!
	#DIV/0!	#DIV/0!	#DIV/0!			#DIV/0!	#DIV/0!	#DIV/0!
	#DIV/0!	#DIV/0!	#DIV/0!			#DIV/0!	#DIV/0!	#DIV/0!
	#DIV/0!	#DIV/0!	#DIV/0!			#DIV/0!	#DIV/0!	#DIV/0!
	#DIV/0!	#DIV/0!	#DIV/0!			#DIV/0!	#DIV/0!	#DIV/0!
	#DIV/0!	#DIV/0!	#DIV/0!			#DIV/0!	#DIV/0!	#DIV/0!
	#DIV/0!	#DIV/0!	#DIV/0!			#DIV/0!	#DIV/0!	#DIV/0!
	#DIV/0!	#DIV/0!	#DIV/0!			#DIV/0!	#DIV/0!	#DIV/0!
	#DIV/0!	#DIV/0!	#DIV/0!			#DIV/0!	#DIV/0!	#DIV/0!
	#DIV/0!	#DIV/0!	#DIV/0!			#DIV/0!	#DIV/0!	#DIV/0!
	#DIV/0!	#DIV/0!	#DIV/0!			#DIV/0!	#DIV/0!	#DIV/0!
	#DIV/0!	#DIV/0!	#DIV/0!			#DIV/0!	#DIV/0!	#DIV/0!
	#DIV/0!	#DIV/0!	#DIV/0!			#DIV/0!	#DIV/0!	#DIV/0!
	#DIV/0!	#DIV/0!	#DIV/0!			#DIV/0!	#DIV/0!	#DIV/0!
	#DIV/0!	#DIV/0!	#DIV/0!			#DIV/0!	#DIV/0!	#DIV/0!
	#DIV/0!	#DIV/0!	#DIV/0!			#DIV/0!	#DIV/0!	#DIV/0!
	#DIV/0!	#DIV/0!	#DIV/0!			#DIV/0!	#DIV/0!	#DIV/0!
	#DIV/0!	#DIV/0!	#DIV/0!			#DIV/0!	#DIV/0!	#DIV/0!
	#DIV/0!	#DIV/0!	#DIV/0!			#DIV/0!	#DIV/0!	#DIV/0!
	#DIV/0!	#DIV/0!	#DIV/0!			#DIV/0!	#DIV/0!	#DIV/0!
	#DIV/0!	#DIV/0!	#DIV/0!			#DIV/0!	#DIV/0!	#DIV/0!
	#DIV/0!	#DIV/0!	#DIV/0!			#DIV/0!	#DIV/0!	#DIV/0!
	#DIV/0!	#DIV/0!	#DIV/0!			#DIV/0!	#DIV/0!	#DIV/0!
	#DIV/0!	#DIV/0!	#DIV/0!			#DIV/0!	#DIV/0!	#DIV/0!
	#DIV/0!	#DIV/0!	#DIV/0!			#DIV/0!	#DIV/0!	#DIV/0!
	#DIV/0!	#DIV/0!	#DIV/0!			#DIV/0!	#DIV/0!	#DIV/0!
	#DIV/0!	#DIV/0!	#DIV/0!			#DIV/0!	#DIV/0!	#DIV/0!
	#DIV/0!	#DIV/0!	#DIV/0!			#DIV/0!	#DIV/0!	#DIV/0!
	#DIV/0!	#DIV/0!	#DIV/0!			#DIV/0!	#DIV/0!	#DIV/0!
	#DIV/0!	#DIV/0!	#DIV/0!			#DIV/0!	#DIV/0!	#DIV/0!
	#DIV/0!	#DIV/0!	#DIV/0!			#DIV/0!	#DIV/0!	#DIV/0!
	#DIV/0!	#DIV/0!	#DIV/0!			#DIV/0!	#DIV/0!	#DIV/0!
	#DIV/0!	#DIV/0!	#DIV/0!			#DIV/0!	#DIV/0!	#DIV/0!
	#DIV/0!	#DIV/0!	#DIV/0!			#DIV/0!	#DIV/0!	#DIV/0!
	#DIV/0!	#DIV/0!	#DIV/0!			#DIV/0!	#DIV/0!	#DIV/0!
	#DIV/0!	#DIV/0!	#DIV/0!			#DIV/0!	#DIV/0!	#DIV/0!
	#DIV/0!	#DIV/0!	#DIV/0!			#DIV/0!	#DIV/0!	#DIV/0!
	#DIV/0!	#DIV/0!	#DIV/0!			#DIV/0!	#DIV/0!	#DIV/0!
	#DIV/0!	#DIV/0!	#DIV/0!			#DIV/0!	#DIV/0!	#DIV/0!
	#DIV/0!	#DIV/0!	#DIV/0!			#DIV/0!	#DIV/0!	#DIV/0!
	#DIV/0!	#DIV/0!	#DIV/0!			#DIV/0!	#DIV/0!	#DIV/0!
	#DIV/0!	#DIV/0!	#DIV/0!			#DIV/0!	#DIV/0!	#DIV/0!
	#DIV/0!	#DIV/0!	#DIV/0!			#DIV/0!	#DIV/0!	#DIV/0!
	#DIV/0!	#DIV/0!	#DIV/0!			#DIV/0!	#DIV/0!	#DIV/0!
	#DIV/0!	#DIV/0!	#DIV/0!			#DIV/0!	#DIV/0!	#DIV/0!
	#DIV/0!	#DIV/0!	#DIV/0!			#DIV/0!	#DIV/0!	#DIV/0!
	#DIV/0!	#DIV/0!	#DIV/0!			#DIV/0!	#DIV/0!	#DIV/0!
	#DIV/0!	#DIV/0!	#DIV/0!			#DIV/0!	#DIV/0!	#DIV/0!
	#DIV/0!	#DIV/0!	#DIV/0!			#DIV/0!	#DIV/0!	#DIV/0!
	#DIV/0!	#DIV/0!	#DIV/0!			#DIV/0!	#DIV/0!	#DIV/0!
	#DIV/0!	#DIV/0!	#DIV/0!			#DIV/0!	#DIV/0!	#DIV/0!
	#DIV/0!	#DIV/0!	#DIV/0!			#DIV/0!	#DIV/0!	#DIV/0!
	#DIV/0!	#DIV/0!	#DIV/0!			#DIV/0!	#DIV/0!	#DIV/0!
	#DIV/0!	#DIV/0!	#DIV/0!			#DIV/0!	#DIV/0!	#DIV/0!
	#DIV/0!	#DIV/0!	#DIV/0!			#DIV/0!	#DIV/0!	#DIV/0!
	#DIV/0!	#DIV/0!	#DIV/0!			#DIV/0!	#DIV/0!	#DIV/0!
	#DIV/0!	#DIV/0!	#DIV/0!			#DIV/0!	#DIV/0!	#DIV/0!
	#DIV/0!	#DIV/0!	#DIV/0!			#DIV/0!	#DIV/0!	#DIV/0!
	#DIV/0!	#DIV/0!	#DIV/0!			#DIV/0!	#DIV/0!	#DIV/0!
	#DIV/0!	#DIV/0!	#DIV/0!			#DIV/0!	#DIV/0!	#DIV/0!
	#DIV/0!	#DIV/0!	#DIV/0!			#DIV/0!	#DIV/0!	#DIV/0!
	#DIV/0!	#DIV/0!	#DIV/0!			#DIV/0!	#DIV/0!	#DIV/0!
	#DIV/0!	#DIV/0!	#DIV/0!			#DIV/0!	#DIV/0!	#DIV/0!
	#DIV/0!	#DIV/0!	#DIV/0!			#DIV/0!	#DIV/0!	#DIV/0!
	#DIV/0!	#DIV/0!	#DIV/0!			#DIV/0!	#DIV/0!	#DIV/0!
	#DIV/0!	#DIV/0!	#DIV/0!			#DIV/0!	#DIV/0!	#DIV/0!
	#DIV/0!	#DIV/0!	#DIV/0!			#DIV/0!	#DIV/0!	#DIV/0!
	#DIV/0!	#DIV/0!	#DIV/0!			#DIV/0!	#DIV/0!	#DIV/0!
	#DIV/0!	#DIV/0!	#DIV/0!			#DIV/0!	#DIV/0!	#DIV/0!
	#DIV/0!	#DIV/0!	#DIV/0!			#DIV/0!	#DIV/0!	#DIV/0!
	#DIV/0!	#DIV/0!	#DIV/0!			#DIV/0!	#DIV/0!	#DIV/0!
	#DIV/0!	#DIV/0!	#DIV/0!			#DIV/0!	#DIV/0!	#DIV/0!
	#DIV/0!	#DIV/0!	#DIV/0!			#DIV/0!	#DIV/0!	#DIV/0!
	#DIV/0!	#DIV/0!	#DIV/0!			#DIV/0!	#DIV/0!	#DIV/0!
	#DIV/0!	#DIV/0!	#DIV/0!			#DIV/0!	#DIV/0!	#DIV/0!
	#DIV/0!	#DIV/0!	#DIV/0!			#DIV/0!	#DIV/0!	#DIV/0!
	#DIV/0!	#DIV/0!	#DIV/0!			#DIV/0!	#DIV/0!	#DIV/0!
	#DIV/0!	#DIV/0!	#DIV/0!			#DIV/0!	#DIV/0!	#DIV/0!
	#DIV/0!	#DIV/0!	#DIV/0!			#DIV/0!	#DIV/0!	#DIV/0!
	#DIV/0!	#DIV/0!	#DIV/0!			#DIV/0!	#DIV/0!	#DIV/0!
	#DIV/0!	#DIV/0!	#DIV/0!			#DIV/0!	#DIV/0!	#DIV/0!
	#DIV/0!	#DIV/0!	#DIV/0!			#DIV/0!	#DIV/0!	#DIV/0!
	#DIV/0!	#DIV/0!	#DIV/0!			#DIV/0!	#DIV/0!	#DIV/0!
	#DIV/0!	#DIV/0!	#DIV/0!			#DIV/0!	#DIV/0!	#DIV/0!
	#DIV/0!	#DIV/0!	#DIV/0!			#DIV/0!	#DIV/0!	#DIV/0!
	#DIV/0!	#DIV/0!	#DIV/0!			#DIV/0!	#DIV/0!	#DIV/0!
	#DIV/0!	#DIV/0!	#DIV/0!			#DIV/0!	#DIV/0!	#DIV/0!
	#DIV/0!	#DIV/0!	#DIV/0!			#DIV/0!	#DIV/0!	#DIV/0!
	#DIV/0!	#DIV/0!	#DIV/0!			#DIV/0!	#DIV/0!	#DIV/0!
	#DIV/0!	#DIV/0!	#DIV/0!			#DIV/0!	#DIV/0!	#DIV/0!
	#DIV/0!	#DIV/0!	#DIV/0!			#DIV/0!	#DIV/0!	#DIV/0!
	#DIV/0!	#DIV/0!	#DIV/0!			#DIV/0!	#DIV/0!	#DIV/0!
	#DIV/0!	#DIV/0!	#DIV/0!			#DIV/0!	#DIV/0!	#DIV/0!
	#DIV/0!	#DIV/0!	#DIV/0!			#DIV/0!	#DIV/0!	#DIV/0!
	#DIV/0!	#DIV/0!	#DIV/0!			#DIV/0!	#DIV/0!	#DIV/0!
	#DIV/0!	#DIV/0!	#DIV/0!			#DIV/0!	#DIV/0!	#DIV/0!
	#DIV/0!	#DIV/0!	#DIV/0!			#DIV/0!	#DIV/0!	#DIV/0!
	#DIV/0!	#DIV/0!	#DIV/0!			#DIV/0!	#DIV/0!	#DIV/0!
	#DIV/0!	#DIV/0!	#DIV/0!			#DIV/0!	#DIV/0!	#DIV/0!
	#DIV/0!	#DIV/0!	#DIV/0!			#DIV/0!	#DIV/0!	#DIV/0!
	#DIV/0!	#DIV/0!	#DIV/0!			#DIV/0!	#DIV/0!	#DIV/0!
	#DIV/0!	#DIV/0!	#DIV/0!			#DIV/0!	#DIV/0!	#DIV/0!
	#DIV/0!	#DIV/0!	#DIV/0!			#DIV/0!	#DIV/0!	#DIV/0!
	#DIV/0!	#DIV/0!	#DIV/0!			#DIV/0!	#DIV/0!	#DIV/0!
	#DIV/0!	#DIV/0!	#DIV/0!			#DIV/0!	#DIV/0!	#DIV/0!
	#DIV/0!	#DIV/0!	#DIV/0!			#DIV/0!	#DIV/0!	#DIV/0!
	#DIV/0!	#DIV/0!	#DIV/0!			#DIV/0!	#DIV/0!	#DIV/0!
	#DIV/0!	#DIV/0!	#DIV/0!			#DIV/0!	#DIV/0!	#DIV/0!
	#DIV/0!	#DIV/0!	#DIV/0!			#DIV/0!	#DIV/0!	#DIV/0!
	#DIV/0!	#DIV/0!	#DIV/0!			#DIV/0!	#DIV/0!	#DIV/0!
	#DIV/0!	#DIV/0!	#DIV/0!			#DIV/0!	#DIV/0!	#DIV/0!
	#DIV/0!	#DIV/0!	#DIV/0!			#DIV/0!	#DIV/0!	#DIV/0!
	#DIV/0!	#DIV/0!	#DIV/0!			#DIV/0!	#DIV/0!	#DIV/0!
	#DIV/0!	#DIV/0!	#DIV/0!			#DIV/0!	#DIV/0!	#DIV/0!
	#DIV/0!	#DIV/0!	#DIV/0!			#DIV/0!	#DIV/0!	#DIV/0!
	#DIV/0!	#DIV/0!	#DIV/0!			#DIV/0!	#DIV/0!	#DIV/0!
	#DIV/0!	#DIV/0!	#DIV/0!			#DIV/0!	#DIV/0!	#DIV/0!
	#DIV/0!	#DIV/0!	#DIV/0!			#DIV/0!	#DIV/0!	#DIV/0!
	#DIV/0!	#DIV/0!	#DIV/0!			#DIV/0!	#DIV/0!	#DIV/0!
	#DIV/0!	#DIV/0!	#DIV/0!			#DIV/0!	#DIV/0!	#DIV/0!
	#DIV/0!	#DIV/0!	#DIV/0!			#DIV/0!	#DIV/0!	#DIV/0!
	#DIV/0!	#DIV/0!	#DIV/0!			#DIV/0!	#DIV/0!	#DIV/0!
	#DIV/0!	#DIV/0!	#DIV/0!			#DIV/0!	#DIV/0!	#DIV/0!
	#DIV/0!	#DIV/0!	#DIV/0!			#DIV/0!	#DIV/0!	#DIV/0!
	#DIV/0!	#DIV/0!	#DIV/0!			#DIV/0!	#DIV/0!	#DIV/0!
	#DIV/0!	#DIV/0!	#DIV/0!			#DIV/0!	#DIV/0!	#DIV/0!
	#DIV/0!	#DIV/0!	#DIV/0!			#DIV/0!	#DIV/0!	#DIV/0!
	#DIV/0!	#DIV/0!	#DIV/0!			#DIV/0!	#DIV/0!	#DIV/0!
	#DIV/0!	#DIV/0!	#DIV/0!			#DIV/0!	#DIV/0!	#DIV/0!
	#DIV/0!	#DIV/0!	#DIV/0!			#DIV/0!	#DIV/0!	#DIV/0!
	#DIV/0!	#DIV/0!	#DIV/0!			#DIV/0!	#DIV/0!	#DIV/0!
	#DIV/0!	#DIV/0!	#DIV/0!			#DIV/0!	#DIV/0!	#DIV/0!
	#DIV/0!	#DIV/0!	#DIV/0!			#DIV/0!	#DIV/0!	#DIV/0!
	#DIV/0!	#DIV/0!	#DIV/0!			#DIV/0!	#DIV/0!	#DIV/0!
	#DIV/0!	#DIV/0!	#DIV/0!			#DIV/0!	#DIV/0!	#DIV/0!
	#DIV/0!	#DIV/0!	#DIV/0!			#DIV/0!	#DIV/0!	#DIV/0!
	#DIV/0!	#DIV/0!	#DIV/0!			#DIV/0!	#DIV/0!	#DIV/0!
	#DIV/0!	#DIV/0!	#DIV/0!			#DIV/0!	#DIV/0!	#DIV/0!
	#DIV/0!	#DIV/0!	#DIV/0!			#DIV/0!	#DIV/0!	#DIV/0!
	#DIV/0!	#DIV/0!	#DIV/0!			#DIV/0!	#DIV/0!	#DIV/0!
	#DIV/0!	#DIV/0!	#DIV/0!			#DIV/0!	#DIV/0!	#DIV/0!
	#DIV/0!	#DIV/0!	#DIV/0!			#DIV/0!	#DIV/0!	#DIV/0!
	#DIV/0!	#DIV/0!	#DIV/0!			#DIV/0!	#DIV/0!	#DIV/0!
	#DIV/0!	#DIV/0!	#DIV/0!			#DIV/0!	#DIV/0!	#DIV/0!
	#DIV/0!	#DIV/0!	#DIV/0!			#DIV/0!	#DIV/0!	#DIV/0!
	#DIV/0!	#DIV/0!	#DIV/0!			#DIV/0!	#DIV/0!	#DIV/0!
	#DIV/0!	#DIV/0!	#DIV/0!			#DIV/0!	#DIV/0!	#DIV/0!
	#DIV/0!	#DIV/0!	#DIV/0!			#DIV/0!	#DIV/0!	#DIV/0!
	#DIV/0!	#DIV/0!	#DIV/0!			#DIV/0!	#DIV/0!	#DIV/0!
	#DIV/0!	#DIV/0!	#DIV/0!			#DIV/0!	#DIV/0!	#DIV/0!
	#DIV/0!	#DIV/0!	#DIV/0!			#DIV/0!	#DIV/0!	#DIV/0!
	#DIV/0!	#DIV/0!	#DIV/0!			#DIV/0!	#DIV/0!	#DIV/0!
	#DIV/0!	#DIV/0!	#DIV/0!			#DIV/0!	#DIV/0!	#DIV/0!
	#DIV/0!	#DIV/0!	#DIV/0!			#DIV/0!	#DIV/0!	#DIV/0!
	#DIV/0!	#DIV/0!	#DIV/0!			#DIV/0!	#DIV/0!	#DIV/0!
	#DIV/0!	#DIV/0!	#DIV/0!			#DIV/0!	#DIV/0!	#DIV/0!
	#DIV/0!	#DIV/0!	#DIV/0!			#DIV/0!	#DIV/0!	#DIV/0!
	#DIV/0!	#DIV/0!	#DIV/0!			#DIV/0!	#DIV/0!	#DIV/0!
	#DIV/0!	#DIV/0!	#DIV/0!			#DIV/0!	#DIV/0!	#DIV/0!
	#DIV/0!	#DIV/0!	#DIV/0!			#DIV/0!	#DIV/0!	#DIV/0!
	#DIV/0!	#DIV/0!	#DIV/0!			#DIV/0!	#DIV/0!	#DIV/0!
	#DIV/0!	#DIV/0!	#DIV/0!			#DIV/0!	#DIV/0!	#DIV/0!
	#DIV/0!	#DIV/0!	#DIV/0!			#DIV/0!	#DIV/0!	#DIV/0!
	#DIV/0!	#DIV/0!	#DIV/0!			#DIV/0!	#DIV/0!	#DIV/0!
	#DIV/0!	#DIV/0!	#DIV/0!			#DIV/0!	#DIV/0!	#DIV/0!
	#DIV/0!	#DIV/0!	#DIV/0!			#DIV/0!	#DIV/0!	#DIV/0!
	#DIV/0!	#DIV/0!	#DIV/0!			#DIV/0!	#DIV/0!	#DIV/0!
	#DIV/0!	#DIV/0!	#DIV/0!			#DIV/0!	#DIV/0!	#DIV/0!
	#DIV/0!	#DIV/0!	#DIV/0!			#DIV/0!	#DIV/0!	#DIV/0!
	#DIV/0!	#DIV/0!	#DIV/0!			#DIV/0!	#DIV/0!	#DIV/0!
	#DIV/0!	#DIV/0!	#DIV/0!			#DIV/0!	#DIV/0!	#DIV/0!
	#DIV/0!	#DIV/0!	#DIV/0!			#DIV/0!	#DIV/0!	#DIV/0!
	#DIV/0!	#DIV/0!	#DIV/0!			#DIV/0!	#DIV/0!	#DIV/0!
	#DIV/0!	#DIV/0!	#DIV/0!			#DIV/0!	#DIV/0!	#DIV/0!
	#DIV/0!	#DIV/0!	#DIV/0!			#DIV/0!	#DIV/0!	#DIV/0!
	#DIV/0!	#DIV/0!	#DIV/0!			#DIV/0!	#DIV/0!	#DIV/0!
	#DIV/0!	#DIV/0!	#DIV/0!			#DIV/0!	#DIV/0!	#DIV/0!
	#DIV/0!	#DIV/0!	#DIV/0!			#DIV/0!	#DIV/0!	#DIV/0!
	#DIV/0!	#DIV/0!	#DIV/0!			#DIV/0!	#DIV/0!	#DIV/0!
	#DIV/0!	#DIV/0!	#DIV/0!			#DIV/0!	#DIV/0!	#DIV/0!
	#DIV/0!	#DIV/0!	#DIV/0!			#DIV/0!	#DIV/0!	#DIV/0!
	#DIV/0!	#DIV/0!	#DIV/0!			#DIV/0!	#DIV/0!	#DIV/0!
	#DIV/0!	#DIV/0!	#DIV/0!			#DIV/0!	#DIV/0!	#DIV/0!
	#DIV/0!	#DIV/0!	#DIV/0!			#DIV/0!	#DIV/0!	#DIV/0!
	#DIV/0!	#DIV/0!	#DIV/0!			#DIV/0!	#DIV/0!	#DIV/0!
	#DIV/0!	#DIV/0!	#DIV/0!			#DIV/0!	#DIV/0!	#DIV/0!
	#DIV/0!	#DIV/0!	#DIV/0!			#DIV/0!	#DIV/0!	#DIV/0!
	#DIV/0!	#DIV/0!	#DIV/0!			#DIV/0!	#DIV/0!	#DIV/0!
	#DIV/0!	#DIV/0!	#DIV/0!			#DIV/0!	#DIV/0!	#DIV/0!
	#DIV/0!	#DIV/0!	#DIV/0!			#DIV/0!	#DIV/0!	#DIV/0!
	#DIV/0!	#DIV/0!	#DIV/0!			#DIV/0!	#DIV/0!	#DIV/0!
	#DIV/0!	#DIV/0!	#DIV/0!			#DIV/0!	#DIV/0!	#DIV/0!
	#DIV/0!	#DIV/0!	#DIV/0!			#DIV/0!	#DIV/0!	#DIV/0!
	#DIV/0!	#DIV/0!	#DIV/0!			#DIV/0!	#DIV/0!	#DIV/0!
	#DIV/0!	#DIV/0!	#DIV/0!			#DIV/0!	#DIV/0!	#DIV/0!
	#DIV/0!	#DIV/0!	#DIV/0!			#DIV/0!	#DIV/0!	#DIV/0!
	#DIV/0!	#DIV/0!	#DIV/0!			#DIV/0!	#DIV/0!	#DIV/0!
	#DIV/0!	#DIV/0!	#DIV/0!			#DIV/0!	#DIV/0!	#DIV/0!

## Sheet: Figure 2F
	Empty Liposomes with NBD-PC				A2aAR Liposomes with NBD-PC				GltpH Liposomes with NBD-PC
Time (s)	exp-1	exp-2	exp-3		exp-1	exp-2	exp-2		exp-1	exp-2	exp-3
0	1.01809	1.01122	1.00858		1.00367	1.00091	1.02615		1.00828	1.00137	1.01274
1	1.01605	1.00841	1.01219		1.00344	0.999565	1.02603		1.00808	1.00002	1.01474
2	1.01374	1.00627	1.00529		1.00311	0.999616	1.0121		1.00266	1.0041	1.00864
3	1.01564	1.00835	1.0031		1.00406	1.00111	1.02648		1.007	1.00523	1.01191
4	1.01643	1.01075	1.00576		1.00445	1.00073	1.03182		1.00294	1.00408	1.00304
5	1.01389	1.00459	1.00975		1.0076	1.00167	1.02515		1.00294	0.999339	1.00688
6	1.01355	1.00841	1.0008		1.00404	1.0008	1.01379		1.0044	1.00462	1.00773
7	1.01438	1.00808	1.01095		1.00593	1.0037	1.01607		1.0037	1.0054	1.0071
8	1.01938	1.00436	1.00714		1.00696	1.00205	1.0174		1.00876	1.00309	1.01296
9	1.01317	1.00357	1.00361		1.00385	1.00309	1.01875		1.00524	1.00407	1.01104
10	1.01651	1.00483	1.00307		1.0065	1.00165	1.0182		1.00142	1.0043	1.00809
11	1.0105	0.999473	1.00694		1.0086	0.998729	1.02061		1.00355	1.00254	1.00962
12	1.01155	1.01166	1.00429		1.00634	0.997989	1.0286		1.0044	1.00366	1.00795
13	1.01386	1.00692	1.00744		1.00582	1.00347	1.01101		1.00179	0.998717	1.00657
14	1.01059	1.00552	1.00953		1.00602	1.0023	1.0155		1.0033	1.00434	1.00333
15	1.01178	1.0047	1.00791		1.00615	1.00045	1.01684		1.00069	1.00256	1.00247
16	1.01143	1.00441	1.00549		1.00396	1.00264	1.01926		1.00138	1.004	1.01811
17	1.01022	1.00787	1.00501		1.00064	1.0037	1.02048		1.00352	1.00421	1.00587
18	1.00949	1.00316	1.0104		1.00406	1.00157	1.01558		1.00189	0.99773	1.00755
19	1.01024	0.998136	1.01418		1.00306	1.00159	1.02006		1.00276	1.00475	0.998857
20	1.01092	0.996554	1.01343		1.00476	1.00019	1.01649		1.00542	1.00484	1.00295
21	1.00982	0.994145	1.01074		1.008	1.00158	1.01975		1.00367	1.00564	0.999847
22	1.00913	0.996433	1.0024		1.00299	0.999881	1.02231		1.00172	0.999943	1.00508
23	1.00691	0.998576	1.00387		1.00414	1.0006	1.01283		1.00619	0.99834	1.00453
24	1.00917	1.00131	1.01029		1.00521	1.00312	1.01061		1.0027	1.00222	1.00923
25	1.00992	1.0023	1.00263		1.0111	0.997498	1.01845		1.00881	0.99881	1.00377
26	1.00673	1.00126	1.00756		1.00583	0.999084	1.00808		1.00393	1.00092	0.999542
27	1.0072	0.998737	1.00645		1.00569	1.00407	1.01691		1.00141	1.0029	1.00643
28	1.01046	0.994828	1.00254		1.00461	0.998611	1.01317		1.00245	1.00104	1.0008
29	1.00881	0.994293	1.0052		1.00285	1.00394	1.01145		1.00018	0.998763	0.999513
30	1.00852	0.996189	1.00467		1.00514	1.0043	1.01914		1.00406	0.999507	1.00668
31	1.00801	0.992604	1.00495		1.00251	0.999789	1.02029		0.999927	1.00119	1.00199
32	1.01163	0.993007	1.00521		1.00262	1.00248	1.01339		1.00118	0.997373	0.999426
33	1.00688	0.993094	1.01301		1.00514	1.0015	1.01373		1.00024	1.00366	1.003
34	1.00654	0.991622	0.999551		1.00245	0.998507	1.01996		1.00011	1.00087	1.006
35	1.00463	0.993083	1.00193		1.00411	0.999974	1.00911		0.999546	0.999534	0.997102
36	1.00645	0.992246	1.00149		1.00319	1.0003	1.01319		1.00164	1.00169	1.00022
37	1.00475	0.996924	1.00624		1.00485	1.00297	0.997862		1.00335	0.996839	1.01363
38	1.007	0.993408	1.0096		1.00112	1.00197	1.01555		0.999906	1.00355	1.00422
39	1.00575	0.997172	0.999374		1.00216	1.00228	1.01385		1.0005	1.00119	1.00587
40	1.00736	0.997379	1.00388		1.0015	0.998989	1.01215		1.00343	0.999969	0.998166
41	1.00569	1.00373	1.00496		1.00517	1.00033	1.01083		1.00146	1.00373	0.999648
42	1.00197	1.00631	1.00304		0.998917	1.00105	1.01185		1.0008	1.00491	1.00583
43	1.00494	1.00265	1.00117		1.00237	0.997243	1.02147		1.00244	1.00404	1.01219
44	1.00588	1.00343	1.00592		1.00187	1.00064	1.0182		1.00198	1.00198	1.00659
45	1.00312	0.998835	1.00616		1.00392	0.998571	1.00255		1.00059	0.998931	0.997865
46	1.00313	0.993156	1.00057		1.00303	1.00038	1.00592		0.997617	1.0029	1.0103
47	1.00636	0.993586	1.00774		0.999927	1.00224	1.00357		0.999133	1.00147	0.990496
48	1.00422	0.993621	0.998274		1.00146	1.0032	1.01522		1.00185	0.99672	0.999293
49	1.00584	0.997267	1.00184		1.00158	0.996948	1.0075		1.0004	1.00026	1.00003
50	1.00335	0.993732	1.00521		1.00219	1.00263	1.00205		1.00063	1.00013	1.00207
51	1.00717	0.992413	1.01082		1.00185	1.0015	1.00358		0.999837	1.0014	1.00307
52	1.00556	0.994155	1.00434		1.00701	1.00078	1.01102		0.999097	1.0014	0.998315
53	1.00589	0.992943	1.0068		1.0015	1.00096	1.00914		1.00185	0.998188	0.996824
54	1.00157	0.992761	1.00491		1.00047	1.00094	1.00724		1.00063	1.00229	0.997476
55	1.00327	0.993057	0.998462		1.00193	0.998731	1.00779		0.999811	1.00129	0.995302
56	1.00303	0.999677	1.00104		1.00122	0.999587	1.01246		0.997903	1.00191	1.00199
57	1.00428	1.00763	0.994997		1.00163	1.00031	1.00739		1.00443	0.999325	0.998818
58	1.00024	1.00046	1.00122		1.0012	1.00201	1.00941		1.00097	1.00081	1.00151
59	1.00088	1.00729	0.996456		1.00284	1.00087	1.00568		1.0006	0.99973	1.00048
60	1.00205	1.00088	0.999205		1.00294	1.00314	1.00645		1.00217	1.00281	0.999263
61	1.00052	1.00062	1.00829		1.00226	0.999373	1.00374		1.00011	0.997815	0.998758
62	1.00175	1.0037	1.00595		1.00114	0.999196	1.00788		1.00066	0.999211	1.00237
63	1.0048	1.00178	1.00556		1.00088	1.00101	1.00199		1.00253	1.00026	1.00132
64	1.00084	0.998735	0.99022		1.00254	1.00029	1.0019		0.999021	0.99894	0.999111
65	1.00181	0.998093	1.01877		1.00031	1.00066	1.00029		1.00137	1.00007	1.00171
66	1.00564	0.998803	1.00445		0.99965	1.00278	1.00403		1.00305	0.996922	0.998593
67	1.00079	1.00345	1.00729		0.999889	0.999827	1.009		0.998955	1.00007	0.997387
68	1.0046	0.999178	1.00727		1.00069	0.998401	1.00381		0.998727	1.00091	1.00015
69	0.999192	1.00168	0.995264		1.00155	0.998835	0.998898		1.0001	0.996697	0.99321
70	1.00275	1.00204	1.01415		0.998608	1.00353	1.00523		1.00277	0.998451	0.99172
71	0.998185	0.996425	1.00432		1.00392	0.99756	1.00501		0.99955	0.998633	0.994618
72	0.998221	1.00227	1.00228		1.00007	0.997285	1.00424		1.00418	0.999909	0.997849
73	0.998752	0.998971	0.994045		1.00163	1.0025	1.00733		0.999901	0.999494	0.999406
74	0.99889	0.998002	0.999823		1.00248	1.0034	1.0095		1.00158	0.997024	0.997033
75	1.00271	0.998728	1.00194		0.999233	1.00253	1.00107		1.00058	1.00133	0.993964
76	1.00099	0.999431	0.996715		1.00373	1.00046	0.998544		1.0006	0.997134	0.990332
77	0.999509	0.997387	1.00429		1.00036	0.999981	1.00274		1.0013	1.00092	0.998456
78	1.00137	0.999157	1.00864		1.00127	1.00067	1.00521		0.997325	1.00358	0.999982
79	0.996602	1.00286	0.99714		1.00009	1.00315	1.00323		0.999658	0.999506	0.999061
80	1.00047	0.99927	1.0031		1.00007	0.998826	0.993763		1.00153	1.00129	1.00345
81	1.00025	1.00222	0.991086		1.00239	0.99643	0.995883		1.00134	1.00124	0.993241
82	0.998747	1.00199	0.996296		0.999068	1.00104	1.00494		1.00212	0.994264	0.999671
83	0.99622	0.995729	1.00508		0.999898	1.00217	1.00115		0.99721	1.00136	0.99712
84	0.99722	1.00013	1.00414		0.999045	1.00065	1.00406		0.99788	1.00072	1.00179
85	1.00709	1.00067	1.00031		0.999533	1.00089	1.0002		0.999928	1.00113	1.00473
86	1.00123	0.996798	0.999284		1.00365	0.997209	1.01385		0.99972	0.996985	0.994318
87	0.99797	1.00263	0.998032		1.00142	0.99667	0.992078		0.998382	0.99545	0.998769
88	0.999522	0.997016	1.00011		0.999468	0.998124	1.00035		0.99717	1.00175	1.00084
89	0.996666	0.998859	1.00356		1.00262	1.00008	1.01241		1.00217	0.998506	1.00055
90	1.0007	0.995394	1.00504		0.998132	1.00047	1.00142		1.00022	1.003	0.989633
91	0.995301	0.997559	1.00669		1.00235	0.995539	0.995892		1.00011	0.999868	1.00033
92	0.997772	1.00096	0.999095		1.00275	1.00176	1.00372		0.998668	1.00326	1.00251
93	0.997242	1.00293	0.995371		0.996325	1.00243	1.00215		0.999228	0.998197	0.996482
94	0.997208	0.998429	1.00512		1.0026	0.998664	1.00199		1.00077	1.00209	0.997004
95	0.999106	1.02205	0.994429		0.999815	1.00877	1.02146		0.99491	0.999193	1.01834
96	1.02079	1.05514	1.01977		1.01588	1.0368	1.05423		1.00078	1.00498	1.04904
97	1.05791	1.06196	1.05537		1.03914	1.06971	1.03932		1.02056	1.03215	1.00133
98	0.970884	0.960027	1.018		0.957267	1.0051	0.938621		1.05254	1.04153	0.941144
99	0.865014	0.906889	0.956847		0.872524	0.92355	0.851805		0.967829	0.966395	0.876004
100	0.810497	0.878555	0.918872		0.764794	0.878995	0.800752		0.880837	0.908194	0.857825
101	0.781377	0.860313	0.890469		0.712349	0.838118	0.763357		0.829398	0.874278	0.836664
102	0.761558	0.847093	0.874289		0.671122	0.790913	0.728657		0.801069	0.865404	0.826424
103	0.74333	0.831849	0.870299		0.631557	0.769045	0.698376		0.789142	0.847732	0.820025
104	0.727515	0.8153	0.855965		0.601052	0.742153	0.668829		0.771815	0.833501	0.804908
105	0.715506	0.798451	0.849233		0.570228	0.717895	0.646017		0.755005	0.820776	0.790603
106	0.701245	0.789887	0.843002		0.539819	0.698283	0.618637		0.745763	0.809226	0.780171
107	0.692906	0.778123	0.832847		0.512798	0.67323	0.596198		0.733103	0.797587	0.768615
108	0.679415	0.765208	0.829758		0.488546	0.656391	0.576925		0.722254	0.78363	0.756027
109	0.670042	0.752771	0.8254		0.462099	0.635528	0.55462		0.712282	0.771896	0.750717
110	0.661535	0.748606	0.816166		0.439022	0.617589	0.533882		0.700993	0.75919	0.739716
111	0.652442	0.74134	0.808278		0.416778	0.599133	0.515454		0.691939	0.748468	0.732993
112	0.644617	0.725448	0.798208		0.399435	0.583342	0.484441		0.680998	0.740709	0.729622
113	0.636854	0.720615	0.790448		0.382819	0.56682	0.483284		0.673481	0.730574	0.718258
114	0.628034	0.707412	0.786167		0.362671	0.552306	0.461132		0.665647	0.722243	0.713409
115	0.623665	0.697486	0.785974		0.348301	0.537547	0.451604		0.657739	0.711443	0.705968
116	0.617508	0.690473	0.773401		0.331327	0.523022	0.434158		0.650212	0.703725	0.695066
117	0.609084	0.683811	0.76051		0.317463	0.510347	0.422363		0.643933	0.700262	0.691791
118	0.604244	0.679383	0.754059		0.302359	0.499468	0.407694		0.637052	0.693387	0.686856
119	0.597468	0.676885	0.758903		0.2923	0.488284	0.391407		0.633144	0.683802	0.68027
120	0.594743	0.666343	0.752176		0.278885	0.475043	0.383763		0.625327	0.675452	0.674791
121	0.588316	0.662239	0.752477		0.266689	0.464092	0.369279		0.621254	0.668775	0.66989
122	0.582614	0.658771	0.736706		0.256858	0.452465	0.357667		0.620279	0.662515	0.667384
123	0.581094	0.655758	0.746733		0.246773	0.442534	0.348389		0.613808	0.659449	0.656116
124	0.576505	0.649946	0.73635		0.237234	0.431079	0.339775		0.607824	0.650288	0.657723
125	0.572472	0.646027	0.736132		0.228144	0.423803	0.325562		0.60334	0.643072	0.643135
126	0.568578	0.643757	0.72075		0.21995	0.415735	0.317986		0.599778	0.643254	0.644366
127	0.56582	0.638998	0.719904		0.210651	0.406596	0.313733		0.597293	0.635802	0.63901
128	0.562699	0.637505	0.724562		0.202918	0.400333	0.304068		0.592536	0.629465	0.633328
129	0.559938	0.638504	0.71308		0.19645	0.389814	0.294122		0.589774	0.627541	0.628736
130	0.55671	0.637465	0.708108		0.18951	0.3833	0.287417		0.585343	0.6242	0.632773
131	0.555968	0.632928	0.702624		0.181989	0.376181	0.281558		0.58315	0.624579	0.624634
132	0.551511	0.629878	0.704567		0.177212	0.369889	0.272623		0.581132	0.619021	0.621879
133	0.550802	0.628439	0.701129		0.171435	0.36593	0.268458		0.578187	0.611521	0.610776
134	0.546772	0.625542	0.696373		0.165779	0.357704	0.257732		0.575318	0.604384	0.614855
135	0.545717	0.621214	0.693854		0.160654	0.3545	0.252776		0.573002	0.599611	0.612445
136	0.542988	0.620068	0.692903		0.157107	0.347669	0.249861		0.569545	0.597299	0.60566
137	0.540642	0.621426	0.690512		0.151404	0.342936	0.243693		0.568551	0.595761	0.606103
138	0.537579	0.613494	0.691775		0.14682	0.336833	0.237653		0.56493	0.590814	0.598774
139	0.536439	0.613782	0.687728		0.143554	0.332349	0.230183		0.563287	0.590935	0.596729
140	0.535732	0.608982	0.676523		0.13977	0.324289	0.230081		0.561272	0.586442	0.589334
141	0.533613	0.609734	0.670981		0.13579	0.320767	0.230041		0.559449	0.585632	0.588901
142	0.531171	0.608158	0.676622		0.132538	0.320505	0.21955		0.559262	0.584018	0.592041
143	0.531699	0.603277	0.682604		0.128769	0.313297	0.215427		0.556072	0.579973	0.586164
144	0.531088	0.603215	0.666802		0.125809	0.310941	0.208513		0.553335	0.575349	0.581488
145	0.526601	0.59921	0.67288		0.123432	0.30608	0.205693		0.552305	0.57651	0.580801
146	0.526252	0.599601	0.670737		0.121083	0.299957	0.208028		0.552552	0.573242	0.58157
147	0.525222	0.595726	0.669732		0.118613	0.295902	0.194928		0.550086	0.568335	0.57809
148	0.524569	0.595774	0.667787		0.115597	0.294255	0.195906		0.549108	0.569459	0.574842
149	0.521436	0.595765	0.662542		0.113867	0.290476	0.194236		0.547417	0.569408	0.579362
150	0.521975	0.597998	0.659986		0.111287	0.288198	0.184857		0.546326	0.565847	0.575134
151	0.521241	0.598828	0.65238		0.109401	0.28578	0.184256		0.544387	0.564692	0.570144
152	0.518061	0.591251	0.652021		0.10748	0.280329	0.181599		0.542953	0.563107	0.571708
153	0.520352	0.59192	0.650409		0.105043	0.279904	0.17802		0.542882	0.561891	0.562999
154	0.515964	0.588207	0.658126		0.104979	0.276099	0.178581		0.54096	0.556663	0.559379
155	0.516464	0.591299	0.653044		0.101949	0.27433	0.174353		0.540005	0.558546	0.561433
156	0.515488	0.593241	0.655143		0.0999485	0.2719	0.17105		0.539358	0.555635	0.554038
157	0.51236	0.590923	0.645038		0.0992423	0.26953	0.170675		0.537933	0.553405	0.556135
158	0.514026	0.59027	0.644214		0.0977903	0.26732	0.169394		0.537365	0.552184	0.556653
159	0.514157	0.588358	0.644131		0.0957966	0.266292	0.162524		0.537228	0.554431	0.552246
160	0.513971	0.585747	0.642437		0.0954849	0.264113	0.15907		0.534753	0.548716	0.554197
161	0.510867	0.584917	0.639633		0.0939583	0.262672	0.158815		0.535063	0.548086	0.551566
162	0.509474	0.58081	0.638945		0.0928964	0.258604	0.158954		0.533863	0.548647	0.551377
163	0.507528	0.586149	0.634823		0.0916776	0.25779	0.156305		0.532905	0.546816	0.547259
164	0.507499	0.585861	0.63174		0.0902973	0.255182	0.152717		0.532306	0.540654	0.542993
165	0.507552	0.58249	0.632928		0.0895512	0.253648	0.149457		0.530528	0.539863	0.541525
166	0.508066	0.578418	0.631413		0.0887642	0.25222	0.149166		0.530508	0.537635	0.542033
167	0.508552	0.582511	0.633499		0.0876623	0.251348	0.144987		0.530256	0.53828	0.540306
168	0.506834	0.581465	0.628155		0.0867175	0.25084	0.14694		0.528315	0.534457	0.54333
169	0.505419	0.584863	0.629194		0.0860064	0.248798	0.142935		0.529939	0.534037	0.540487
170	0.504097	0.574227	0.631094		0.085547	0.245704	0.142453		0.528941	0.532029	0.531268
171	0.503254	0.577476	0.626468		0.0844267	0.244874	0.140629		0.526959	0.534177	0.534362
172	0.503656	0.578224	0.625914		0.0843374	0.243964	0.137142		0.526153	0.535053	0.535309
173	0.503002	0.580405	0.620553		0.0836592	0.240825	0.136305		0.526898	0.530715	0.528941
174	0.503479	0.575285	0.622534		0.0826986	0.240874	0.135481		0.526388	0.53432	0.534924
175	0.50064	0.580317	0.617867		0.0820392	0.238653	0.135495		0.524564	0.537471	0.531054
176	0.500212	0.577174	0.615621		0.0818833	0.238547	0.129922		0.523532	0.536015	0.538982
177	0.499757	0.574011	0.614815		0.0808838	0.237521	0.130693		0.524987	0.533945	0.525434
178	0.497977	0.575282	0.616861		0.0804481	0.236823	0.127854		0.523249	0.535219	0.532325
179	0.498971	0.571454	0.611299		0.0805453	0.236712	0.128792		0.522352	0.529772	0.521828
180	0.497325	0.573057	0.617786		0.0793446	0.233102	0.125662		0.521943	0.532155	0.525285
181	0.498048	0.57718	0.617324		0.0791567	0.231526	0.124366		0.520888	0.529803	0.522517
182	0.495958	0.571008	0.621801		0.0782271	0.231328	0.122309		0.521605	0.529302	0.525907
183	0.498444	0.574937	0.612257		0.0782253	0.231297	0.122136		0.520177	0.530244	0.518241
184	0.496336	0.573097	0.607375		0.0776896	0.230083	0.11925		0.520383	0.530236	0.520738
185	0.496344	0.572993	0.612748		0.0775954	0.229265	0.118625		0.518048	0.526969	0.519517
186	0.495142	0.574913	0.609234		0.0769562	0.229012	0.117212		0.520887	0.526028	0.519306
187	0.495759	0.567265	0.608904		0.0769302	0.22824	0.117595		0.518277	0.524958	0.520321
188	0.494705	0.571158	0.610235		0.0761999	0.225976	0.114655		0.51862	0.528114	0.517605
189	0.494162	0.566166	0.603047		0.0754784	0.224188	0.115584		0.51714	0.525918	0.51707
190	0.494099	0.570602	0.597911		0.0753473	0.223774	0.113624		0.517609	0.528747	0.516921
191	0.493154	0.571556	0.604208		0.0749383	0.223737	0.111083		0.516739	0.525638	0.517692
192	0.492268	0.566436	0.608754		0.0747731	0.224268	0.110149		0.516357	0.522031	0.510377
193	0.493501	0.570027	0.612349		0.0744593	0.222554	0.107941		0.51521	0.517293	0.508783
194	0.493321	0.57113	0.598606		0.0744659	0.22253	0.107887		0.514814	0.519338	0.510577
195	0.489825	0.572476	0.599335		0.073939	0.221925	0.106859		0.514555	0.518134	0.515135
196	0.489262	0.570188	0.595381		0.0735853	0.221376	0.1047		0.514031	0.516739	0.504506
197	0.490153	0.565972	0.595835		0.0733817	0.219768	0.104117		0.513897	0.515958	0.506621
198	0.490784	0.568091	0.596318		0.0727469	0.219728	0.103966		0.513952	0.515003	0.508368
199	0.489035	0.566906	0.595526		0.0732445	0.218997	0.101574		0.514027	0.514583	0.510089
200	0.490967	0.564588	0.593438		0.072296	0.217293	0.104416		0.51264	0.515054	0.503135
201	0.488753	0.56328	0.585263		0.07226	0.217206	0.100323		0.51239	0.514471	0.499595
202	0.488007	0.568582	0.585236		0.0720704	0.216891	0.100123		0.512615	0.513312	0.501396
203	0.487587	0.56436	0.598398		0.0715294	0.215559	0.0998007		0.511556	0.512801	0.501118
204	0.488048	0.565747	0.588727		0.0718087	0.215478	0.0996956		0.51139	0.511439	0.501747
205	0.486362	0.565843	0.593481		0.0725421	0.214823	0.0965746		0.510392	0.513237	0.500269
206	0.486263	0.564665	0.590199		0.0712175	0.216605	0.0983392		0.510245	0.513897	0.499007
207	0.485089	0.562327	0.58216		0.0709018	0.21493	0.0958238		0.510173	0.512224	0.493528
208	0.484566	0.563705	0.590963		0.0709974	0.213181	0.0938787		0.510582	0.51907	0.494155
209	0.486096	0.561659	0.593157		0.0705914	0.212	0.0933336		0.509164	0.513953	0.498097
210	0.485336	0.563096	0.586357		0.0699935	0.211894	0.0927153		0.509898	0.517357	0.494471
211	0.485248	0.564317	0.586531		0.0701805	0.212157	0.0928286		0.508524	0.51657	0.491841
212	0.484428	0.558556	0.584744		0.0698776	0.211887	0.092341		0.508374	0.515681	0.490722
213	0.484869	0.561679	0.583891		0.0697747	0.209664	0.0934346		0.507426	0.513972	0.4949
214	0.480933	0.560766	0.581618		0.0691446	0.210685	0.0895364		0.50818	0.514396	0.492119
215	0.482516	0.560147	0.581647		0.0695098	0.209651	0.0891376		0.508022	0.513194	0.488795
216	0.48225	0.56034	0.578941		0.0691546	0.211279	0.088039		0.50689	0.515065	0.486376
217	0.482459	0.558381	0.588018		0.0688732	0.209074	0.0884392		0.506684	0.515237	0.48638
218	0.482063	0.560314	0.576148		0.0689097	0.209038	0.088364		0.505964	0.5113	0.488477
219	0.481704	0.556568	0.579885		0.0686534	0.208066	0.0878648		0.50567	0.514433	0.484262
220	0.481215	0.559263	0.580509		0.068511	0.207556	0.0853658		0.505219	0.511267	0.486227
221	0.479456	0.559056	0.574687		0.0681933	0.206968	0.0836298		0.505711	0.507142	0.486747
222	0.479453	0.561526	0.575302		0.0683516	0.205406	0.0849398		0.504323	0.51032	0.478773
223	0.481168	0.558715	0.569979		0.0681839	0.206531	0.0841892		0.504825	0.510482	0.484107
224	0.479885	0.561013	0.575544		0.0676245	0.205181	0.0822011		0.504374	0.510216	0.486754
225	0.480029	0.55663	0.573545		0.0677623	0.20528	0.082841		0.505363	0.51058	0.485121
226	0.479748	0.555149	0.578136		0.0676331	0.205226	0.0813732		0.504018	0.507681	0.479059
227	0.479863	0.561861	0.569487		0.0674656	0.204553	0.0821535		0.502292	0.510312	0.482214
228	0.478597	0.559034	0.567805		0.0670177	0.204871	0.0792753		0.50303	0.509953	0.48292
229	0.47809	0.556859	0.568648		0.0674006	0.203122	0.081655		0.502785	0.507508	0.475282
230	0.480361	0.557442	0.572343		0.0669513	0.203235	0.0799115		0.503221	0.505221	0.477793
231	0.477504	0.559287	0.573133		0.0668481	0.203513	0.0776712		0.502625	0.502913	0.4851
232	0.47522	0.559424	0.573917		0.0667267	0.20359	0.0776976		0.501338	0.503282	0.473434
233	0.475846	0.555037	0.567168		0.0661919	0.202313	0.0752702		0.50176	0.503195	0.469678
234	0.476395	0.556039	0.571031		0.06624	0.201867	0.0764147		0.501706	0.501815	0.472567
235	0.477571	0.557652	0.565831		0.066041	0.201403	0.076798		0.501137	0.500752	0.473081
236	0.477659	0.556345	0.570025		0.0660291	0.20261	0.0747183		0.500466	0.499841	0.474504
237	0.476341	0.554009	0.565006		0.0655832	0.200723	0.0742249		0.500403	0.499777	0.476772
238	0.474725	0.556189	0.571392		0.0658492	0.200889	0.0739948		0.499683	0.50166	0.476666
239	0.474078	0.55669	0.566827		0.0658706	0.199696	0.0745765		0.499602	0.505262	0.469802
240	0.472476	0.552763	0.564329		0.0657387	0.200472	0.0731916		0.499313	0.50659	0.470492
241	0.475387	0.554308	0.562328		0.0657185	0.199927	0.0717059		0.498672	0.502715	0.470946
242	0.473487	0.557904	0.56129		0.0656064	0.199042	0.0708762		0.499271	0.502704	0.473176
243	0.472655	0.554905	0.558659		0.0651745	0.199517	0.0712962		0.498641	0.503443	0.469697
244	0.475959	0.555763	0.559815		0.0655099	0.1988	0.0707884		0.498814	0.502727	0.465653
245	0.476708	0.553601	0.561342		0.0647882	0.198581	0.0708151		0.498014	0.505798	0.465223
246	0.471958	0.55418	0.561425		0.0651196	0.198714	0.0690608		0.496357	0.502726	0.469893
247	0.470512	0.554032	0.556377		0.0649266	0.197868	0.0692197		0.497749	0.499431	0.464883
248	0.472222	0.550688	0.55746		0.0646903	0.196688	0.0680976		0.498944	0.498396	0.464809
249	0.471434	0.551032	0.557298		0.064709	0.196621	0.0684585		0.497999	0.498985	0.46262
250	0.472791	0.55131	0.552534		0.0644781	0.196612	0.0681926		0.496963	0.502562	0.466265
251	0.472992	0.551879	0.556373		0.06447	0.196235	0.0669048		0.497247	0.501732	0.461948
252	0.471857	0.552956	0.554979		0.0642084	0.19555	0.0672087		0.496864	0.502271	0.460555
253	0.471937	0.551611	0.55551		0.0643763	0.196449	0.0661495		0.496776	0.503726	0.460917
254	0.471536	0.551342	0.552039		0.0639159	0.196461	0.0667162		0.495747	0.498594	0.462414
255	0.473055	0.548518	0.552042		0.0638905	0.195326	0.0663967		0.495653	0.500689	0.46047
256	0.469389	0.550502	0.547882		0.0638695	0.195153	0.0640432		0.496355	0.499999	0.459602
257	0.471656	0.550341	0.550879		0.0638971	0.195137	0.0650251		0.495914	0.499758	0.458456
258	0.469717	0.549592	0.552888		0.0635683	0.195269	0.0648328		0.495973	0.499126	0.460086
259	0.469406	0.547746	0.55361		0.0638285	0.194873	0.0645625		0.494915	0.500088	0.460031
260	0.47086	0.547097	0.545232		0.0632638	0.195367	0.0637412		0.494787	0.500412	0.456473
261	0.469653	0.552232	0.549009		0.0634144	0.194018	0.0628125		0.492775	0.497937	0.458643
262	0.468598	0.551055	0.547686		0.0636105	0.193984	0.0618087		0.495338	0.498671	0.462551
263	0.470514	0.551019	0.550825		0.0631882	0.193131	0.0632517		0.49489	0.49621	0.455118
264	0.469256	0.549725	0.551438		0.0634636	0.193255	0.0621475		0.493758	0.498736	0.452715
265	0.468189	0.5527	0.540796		0.0631402	0.193436	0.0608897		0.494127	0.497441	0.454449
266	0.46829	0.553216	0.545804		0.0627192	0.192027	0.0610827		0.492913	0.496171	0.451722
267	0.468084	0.546951	0.548739		0.0628953	0.192699	0.0599865		0.492861	0.497683	0.45248
268	0.467731	0.550269	0.539206		0.0629437	0.192689	0.0605663		0.49406	0.498848	0.454552
269	0.467405	0.549116	0.547732		0.0627669	0.191592	0.0604129		0.492769	0.495081	0.452596
270	0.466253	0.549254	0.539155		0.0625887	0.190458	0.0598923		0.492153	0.497629	0.451702
271	0.466817	0.551858	0.54749		0.0623036	0.190897	0.0589136		0.493008	0.494062	0.453971
272	0.467462	0.547111	0.53847		0.0625372	0.191055	0.0590723		0.492466	0.490672	0.44659
273	0.466483	0.548713	0.540212		0.0624552	0.191489	0.0584183		0.492102	0.491619	0.449857
274	0.465577	0.546383	0.536476		0.0626303	0.190135	0.0588895		0.49138	0.492289	0.451961
275	0.46822	0.54962	0.543211		0.0622675	0.190026	0.0573413		0.491367	0.491392	0.450662
276	0.465772	0.547474	0.534171		0.0620518	0.19008	0.0569006		0.49106	0.491916	0.447303
277	0.464449	0.547752	0.539352		0.0621477	0.189045	0.0575879		0.490673	0.492353	0.4457
278	0.464256	0.546635	0.539028		0.0619495	0.190397	0.0583344		0.490857	0.491106	0.448814
279	0.465917	0.541033	0.540572		0.061962	0.189496	0.0574378		0.4918	0.490882	0.448045
280	0.463077	0.544801	0.535201		0.06201	0.190354	0.0556498		0.490812	0.488174	0.442095
281	0.463573	0.550211	0.537375		0.0622383	0.187847	0.055559		0.489717	0.488571	0.442561
282	0.4644	0.544957	0.541078		0.0617437	0.188346	0.0556642		0.489884	0.490436	0.444005
283	0.463945	0.54566	0.539056		0.0618329	0.187569	0.0544999		0.488968	0.489159	0.444892
284	0.463599	0.5449	0.532859		0.061516	0.188791	0.0550639		0.490234	0.489636	0.442494
285	0.462146	0.543934	0.527893		0.0613606	0.188944	0.0550879		0.489153	0.489671	0.448066
286	0.462916	0.542854	0.534442		0.0608805	0.187494	0.054289		0.489161	0.487438	0.441072
287	0.46314	0.540815	0.531509		0.0614021	0.187596	0.0534186		0.487763	0.487817	0.43837
288	0.462807	0.540108	0.533729		0.061421	0.18854	0.0526328		0.489051	0.490217	0.440393
289	0.462515	0.540207	0.529448		0.0609156	0.187907	0.0540964		0.488404	0.49251	0.44007
290	0.462788	0.539324	0.529478		0.0612031	0.187015	0.0529449		0.488554	0.493104	0.444225
291	0.462435	0.542306	0.527931		0.0610188	0.188122	0.0517922		0.48868	0.494962	0.440075
292	0.460854	0.540251	0.529198		0.0607565	0.186752	0.051999		0.488256	0.492271	0.438921
293	0.461063	0.538755	0.532039		0.0613192	0.187235	0.0526104		0.487523	0.493034	0.442984
294	0.460718	0.536877	0.528726		0.0606542	0.187024	0.0505944		0.48835	0.490475	0.439621
295	0.460017	0.538658	0.528537		0.0608486	0.185715	0.0518522		0.487177	0.491069	0.436899
296	0.460958	0.540587	0.530601		0.060783	0.18664	0.0512357		0.486507	0.490841	0.435034
297	0.46101	0.53615	0.528513		0.0607398	0.185858	0.0512618		0.487651	0.493045	0.441626
298	0.46139	0.543637	0.529413		0.0602596	0.186639	0.0520672		0.487087	0.490754	0.437533
299	0.458634	0.542683	0.528882		0.0605652	0.186729	0.0507316		0.4868	0.491488	0.436505
300	0.459287	0.541183	0.528432		0.0605586	0.185592	0.0513081		0.486837	0.488844	0.436881
301	0.459402	0.546504	0.526488		0.0603913	0.186752	0.0510594		0.487045	0.490053	0.434318
302	0.459475	0.542708	0.526745		0.0601055	0.185174	0.0493165		0.486096	0.492163	0.433997
303	0.460933	0.540758	0.522688		0.0605109	0.185034	0.0502198		0.486512	0.494169	0.432992
304	0.458867	0.543892	0.529103		0.0601973	0.186344	0.0488927		0.485482	0.49011	0.435726
305	0.460514	0.53867	0.523639		0.0598522	0.185234	0.0491086		0.485059	0.489196	0.429996
306	0.459709	0.540225	0.526386		0.0599604	0.184383	0.0496601		0.486358	0.490373	0.432253
307	0.459933	0.540822	0.527555		0.0600748	0.184526	0.0488715		0.48474	0.489695	0.429078
308	0.459025	0.53547	0.518386		0.0595387	0.183957	0.0491094		0.487016	0.487716	0.432382
309	0.459366	0.53987	0.518102		0.0599801	0.183831	0.0472992		0.484549	0.487537	0.433151
310	0.457006	0.535871	0.520806		0.0596773	0.183538	0.0483591		0.484638	0.488796	0.429332
311	0.45754	0.541055	0.518167		0.0597812	0.183108	0.0480092		0.484833	0.489417	0.432621
312	0.457682	0.539927	0.520621		0.0594672	0.183849	0.0474316		0.483528	0.487564	0.427554
313	0.456645	0.543137	0.520055		0.0603683	0.18362	0.0471616		0.484477	0.483746	0.426892
314	0.457224	0.53647	0.51777		0.0596181	0.183502	0.0471372		0.484235	0.483215	0.431433
315	0.456226	0.538582	0.520121		0.0605345	0.182715	0.0468962		0.484975	0.482082	0.431012
316	0.454527	0.538075	0.522961		0.0600914	0.182975	0.0463367		0.483773	0.482981	0.426739
317	0.455286	0.535488	0.517091		0.0596612	0.182394	0.046828		0.482994	0.483255	0.428297
318	0.457183	0.536924	0.524938		0.0593374	0.182825	0.0459941		0.483291	0.484676	0.426922
319	0.455371	0.537526	0.521351		0.0590426	0.181787	0.0462351		0.483069	0.484603	0.425258
320	0.454646	0.539887	0.514654		0.0592587	0.181259	0.0453347		0.483582	0.481677	0.425358
321	0.454301	0.537027	0.519725		0.059317	0.182282	0.0458022		0.482563	0.481164	0.420989
322	0.455462	0.535386	0.516717		0.0590557	0.181671	0.045322		0.483915	0.482661	0.425417
323	0.456284	0.536979	0.517128		0.0589295	0.181603	0.0454067		0.482999	0.480815	0.425371
324	0.455233	0.53666	0.514662		0.0590933	0.181055	0.0450575		0.483081	0.480292	0.424532
325	0.454963	0.538885	0.517107		0.059149	0.18046	0.0443003		0.483263	0.479989	0.421846
326	0.453364	0.541043	0.51248		0.0593703	0.181228	0.0443901		0.483261	0.482369	0.426429
327	0.454489	0.539661	0.513125		0.0593109	0.180571	0.0447172		0.481455	0.480148	0.426565
328	0.454009	0.537775	0.507217		0.0587961	0.181158	0.0441496		0.48281	0.487096	0.427519
329	0.454545	0.531547	0.514431		0.0593522	0.180901	0.0443779		0.482389	0.485103	0.421416
330	0.454366	0.533253	0.511263		0.0589177	0.180357	0.0445688		0.480758	0.489067	0.419372
331	0.451929	0.534407	0.515792		0.0592429	0.181623	0.0432491		0.480985	0.486377	0.421544
332	0.453429	0.535908	0.511586		0.058537	0.179191	0.0437111		0.480271	0.486217	0.419003
333	0.453156	0.537789	0.511375		0.0586784	0.179154	0.0435235		0.480163	0.485455	0.417286
334	0.454395	0.538868	0.50818		0.0590473	0.179977	0.0434781		0.481034	0.48556	0.422822
335	0.453197	0.534591	0.50901		0.0583625	0.179872	0.0431021		0.48052	0.486246	0.422374
336	0.452989	0.533914	0.515052		0.0583382	0.179322	0.0436299		0.479889	0.486453	0.41599
337	0.454184	0.532412	0.507316		0.0587572	0.179709	0.0430977		0.480113	0.48773	0.417804
338	0.453353	0.53379	0.50789		0.0583763	0.179088	0.0419507		0.47934	0.483935	0.418209
339	0.452039	0.53692	0.504594		0.0583505	0.179114	0.0422263		0.480073	0.485794	0.415666
340	0.452966	0.532787	0.508799		0.0580509	0.179066	0.0428174		0.480546	0.482643	0.417916
341	0.451359	0.535264	0.506614		0.058409	0.179441	0.0429201		0.480575	0.481712	0.416161
342	0.453574	0.534326	0.501335		0.0581672	0.178559	0.0431648		0.478734	0.48468	0.416868
343	0.451478	0.536004	0.506279		0.0581476	0.178741	0.0414931		0.479901	0.483784	0.417147
344	0.453245	0.532696	0.505246		0.0579158	0.179045	0.0421805		0.479152	0.482474	0.414246
345	0.450676	0.532477	0.511781		0.0578612	0.178281	0.0420968		0.478385	0.482307	0.414249
346	0.449929	0.533958	0.506882		0.0580746	0.178152	0.0410748		0.479008	0.483107	0.41414
347	0.450411	0.531362	0.503914		0.0581841	0.178167	0.0411423		0.479462	0.483449	0.415154
348	0.450758	0.533531	0.509971		0.0580648	0.177127	0.0414867		0.479917	0.482286	0.412091
349	0.450538	0.533088	0.504468		0.0582148	0.177417	0.0415011		0.479202	0.483263	0.415722
350	0.451645	0.529635	0.508744		0.0578123	0.17725	0.04107		0.477015	0.482644	0.412822
351	0.449725	0.529382	0.499158		0.0581257	0.177236	0.0408656		0.47903	0.481078	0.41072
352	0.450421	0.53291	0.507692		0.057705	0.17802	0.0404376		0.478043	0.477793	0.410966
353	0.448657	0.53434	0.497944		0.057871	0.177819	0.0408947		0.478157	0.478512	0.408543
354	0.451348	0.529104	0.504015		0.0575143	0.176513	0.0403967		0.477392	0.487316	0.411614
355	0.448884	0.528993	0.49949		0.0576141	0.176101	0.0402034		0.478667	0.483742	0.413367
356	0.448808	0.526455	0.502621		0.0576813	0.176276	0.0398933		0.477257	0.48555	0.410715
357	0.446957	0.535246	0.497464		0.0575074	0.176276	0.0392292		0.476487	0.480263	0.414486
358	0.447573	0.533216	0.50024		0.0574768	0.176663	0.0398481		0.477313	0.47512	0.41027
359	0.44978	0.534789	0.497518		0.0573492	0.176243	0.0397105		0.476729	0.475806	0.408654
360	0.450054	0.529292	0.499038		0.0570959	0.175812	0.0399932		0.476774	0.478008	0.412847
361	0.44877	0.529544	0.504366		0.0573587	0.175742	0.03943		0.47649	0.482296	0.406598
362	0.448981	0.530007	0.499656		0.0573321	0.175361	0.0395587		0.476989	0.481787	0.411106
363	0.448222	0.5286	0.497264		0.0571561	0.176738	0.0392689		0.476738	0.476889	0.407055
364	0.448519	0.532386	0.499389		0.0569958	0.175664	0.0392794		0.476397	0.482547	0.407856
365	0.445897	0.529782	0.500684		0.0572411	0.175922	0.0391394		0.47579	0.480229	0.402772
366	0.44622	0.532511	0.498536		0.0570105	0.175613	0.0389283		0.476089	0.480897	0.410643
367	0.448678	0.529856	0.500701		0.0568902	0.175387	0.0390252		0.476037	0.479211	0.407294
368	0.446984	0.529085	0.498059		0.05681	0.174836	0.0388972		0.476028	0.479976	0.407147
369	0.447599	0.530573	0.495363		0.0572337	0.174855	0.0381543		0.475238	0.478487	0.402676
370	0.446151	0.527245	0.501592		0.0568712	0.175281	0.0386602		0.475097	0.482412	0.406132
371	0.445484	0.527282	0.499897		0.057024	0.174695	0.0380337		0.474926	0.48176	0.408411
372	0.446535	0.529254	0.492496		0.0572145	0.175283	0.0384382		0.475018	0.477229	0.406207
373	0.44553	0.527419	0.496615		0.0568132	0.174685	0.0379383		0.475274	0.475054	0.401718
374	0.446872	0.528792	0.495944		0.0572649	0.17418	0.0378847		0.475919	0.483042	0.400619
375	0.44391	0.528876	0.492687		0.056789	0.173881	0.0374965		0.473528	0.480855	0.402494
376	0.445444	0.528058	0.491914		0.0567641	0.174428	0.0378555		0.475164	0.482201	0.402109
377	0.444653	0.530572	0.494441		0.0567697	0.173909	0.0380521		0.474125	0.47944	0.402406
378	0.446254	0.528481	0.492529		0.0566865	0.174458	0.0379731		0.474925	0.478345	0.400303
379	0.445124	0.528238	0.490999		0.0562907	0.1735	0.0369092		0.4746	0.480925	0.39882
380	0.446337	0.525266	0.489377		0.0561592	0.173449	0.0364383		0.47439	0.479594	0.401727
381	0.445372	0.523221	0.492208		0.0563755	0.172898	0.0365021		0.473693	0.47798	0.398604
382	0.445897	0.518156	0.485313		0.0568126	0.173626	0.0371935		0.473911	0.47708	0.397098
383	0.445758	0.519539	0.495486		0.0564343	0.173718	0.037382		0.473558	0.478138	0.402286
384	0.443604	0.521417	0.488375		0.0563163	0.173024	0.0368079		0.473184	0.477604	0.403449
385	0.443986	0.520581	0.490067		0.0563699	0.172914	0.0365237		0.474294	0.477616	0.395711
386	0.444705	0.520628	0.485827		0.0562757	0.173755	0.0366792		0.473548	0.478106	0.398551
387	0.444201	0.518386	0.493213		0.0561488	0.172811	0.0362024		0.472724	0.477513	0.3969
388	0.444157	0.519476	0.485694		0.0562221	0.172765	0.0367335		0.473686	0.475079	0.397259
389	0.441973	0.519672	0.489645		0.0568449	0.173581	0.0362081		0.474579	0.476287	0.398518
390	0.443224	0.520956	0.491402		0.0560099	0.172125	0.0369044		0.47378	0.475897	0.400711
391	0.443877	0.519603	0.485065		0.0560695	0.172053	0.0367152		0.472288	0.474274	0.397718
392	0.444381	0.525785	0.485052		0.0556997	0.173355	0.0359631		0.473072	0.477927	0.394025
393	0.443746	0.52669	0.485569		0.0559233	0.171961	0.0366265		0.473704	0.478734	0.390887
394	0.442318	0.526409	0.488572		0.0554564	0.172941	0.0358592		0.472234	0.476897	0.39302
395	0.44436	0.526778	0.490188		0.0560623	0.171515	0.0361965		0.472029	0.473919	0.395667
396	0.444362	0.5225	0.48896		0.0559284	0.17187	0.0351118		0.47182	0.477771	0.39426
397	0.441799	0.524932	0.49025		0.0558245	0.171017	0.0354025		0.471052	0.475088	0.396722
398	0.441762	0.526687	0.489719		0.0560985	0.172464	0.0357134		0.470965	0.4794	0.397161
399	0.442433	0.526947	0.488796		0.0558825	0.171612	0.0352553		0.471118	0.477861	0.391694
400	0.442934	0.52786	0.486337		0.0554137	0.172027	0.0352529		0.471524	0.475063	0.394364
401	0.440275	0.526006	0.484133		0.055806	0.172517	0.0356733		0.471191	0.475223	0.391174
402	0.44072	0.517993	0.484394		0.0555986	0.170848	0.0354566		0.472063	0.475167	0.390186
403	0.442436	0.516205	0.484359		0.05607	0.1713	0.0345803		0.47002	0.474361	0.389039
404	0.442334	0.521349	0.485002		0.0557678	0.170911	0.0347964		0.470974	0.475993	0.39027
405	0.440727	0.51715	0.486302		0.0552503	0.170675	0.0348244		0.471092	0.473696	0.38704
406	0.441329	0.516597	0.485038		0.0553005	0.17054	0.0346368		0.471385	0.471149	0.390055
407	0.439519	0.516157	0.483152		0.0554988	0.171591	0.0347835		0.470142	0.469824	0.389687
408	0.441499	0.520261	0.47866		0.0553362	0.17052	0.0346743		0.470763	0.468474	0.388954
409	0.441486	0.517532	0.48392		0.0554643	0.171266	0.0351344		0.471033	0.470712	0.390271
410	0.441277	0.517871	0.479743		0.0556695	0.17066	0.0346367		0.469513	0.467679	0.38682
411	0.439565	0.517726	0.483846		0.05509	0.170539	0.0341945		0.469686	0.469561	0.387283
412	0.440569	0.515675	0.484119		0.0552643	0.169657	0.0351956		0.468756	0.469826	0.386986
413	0.439354	0.512861	0.485941		0.055163	0.170089	0.0345274		0.46883	0.469468	0.387433
414	0.4416	0.518162	0.481521		0.0552562	0.169574	0.0346445		0.469352	0.46896	0.391209
415	0.439834	0.519385	0.481022		0.0551469	0.170806	0.0347763		0.470436	0.468819	0.390633
416	0.439147	0.51779	0.483518		0.0555652	0.169096	0.0339901		0.468354	0.469487	0.388106
417	0.44005	0.516549	0.484363		0.0553931	0.169298	0.0338747		0.468916	0.468452	0.385837
418	0.439413	0.514425	0.481391		0.0553774	0.169435	0.0336872		0.469407	0.469562	0.384158
419	0.439588	0.51331	0.479051		0.055102	0.168535	0.033939		0.468085	0.468793	0.390634
420	0.439662	0.515363	0.48152		0.055086	0.169786	0.0336464		0.468748	0.468269	0.387975
421	0.438182	0.516108	0.478077		0.0550997	0.169644	0.0334583		0.468743	0.469523	0.385679
422	0.437972	0.51505	0.480517		0.0549948	0.168723	0.0338642		0.46836	0.467556	0.386978
423	0.437538	0.523429	0.477335		0.0549037	0.168524	0.0336663		0.467631	0.469212	0.387503
424	0.438929	0.521294	0.47659		0.0551061	0.169489	0.0338005		0.468008	0.467854	0.386538
425	0.439191	0.520662	0.475966		0.0548619	0.168532	0.0337847		0.468902	0.465616	0.386047
426	0.437973	0.517139	0.477255		0.0545767	0.169382	0.034192		0.467369	0.467443	0.385351
427	0.437366	0.520788	0.479855		0.0549965	0.168692	0.0335175		0.467402	0.467183	0.38018
428	0.437534	0.52182	0.476965		0.0550892	0.168275	0.0336919		0.467608	0.468797	0.381581
429	0.43673	0.522353	0.477781		0.0544796	0.169581	0.032958		0.46714	0.468398	0.382249
430	0.437639	0.520524	0.483027		0.0547559	0.168559	0.0335845		0.467666	0.468198	0.38329
431	0.43806	0.513267	0.481707		0.05491	0.16734	0.0330704		0.469064	0.466624	0.383237
432	0.437221	0.513627	0.47694		0.0543921	0.168238	0.032997		0.468244	0.466002	0.384748
433	0.436992	0.514651	0.473577		0.0546335	0.168924	0.032882		0.466286	0.466763	0.386156
434	0.436924	0.511353	0.477743		0.0544733	0.168016	0.0326848		0.467489	0.467026	0.38312
435	0.437021	0.513706	0.479639		0.0545599	0.166774	0.0324047		0.467542	0.4659	0.379094
436	0.437192	0.513518	0.475576		0.0544773	0.168142	0.0326262		0.466557	0.465235	0.382754
437	0.436577	0.515559	0.476066		0.0543102	0.168294	0.0327323		0.46674	0.467854	0.381511
438	0.435205	0.514055	0.475138		0.054593	0.169531	0.0325881		0.466408	0.467722	0.381095
439	0.436151	0.513639	0.473658		0.0542698	0.168328	0.0324487		0.465213	0.46926	0.37861
440	0.435542	0.51732	0.468989		0.0543984	0.167603	0.0318305		0.465844	0.46823	0.380758
441	0.435619	0.513948	0.473832		0.0543708	0.16794	0.0322718		0.465918	0.472339	0.380979
442	0.436553	0.517866	0.471073		0.0542443	0.167339	0.0325889		0.465976	0.471082	0.378113
443	0.436371	0.518328	0.473229		0.0542994	0.16791	0.0319392		0.466815	0.468007	0.382796
444	0.436977	0.516117	0.472746		0.0547475	0.16838	0.0326695		0.46564	0.471503	0.377509
445	0.435727	0.516389	0.469231		0.0536235	0.167477	0.0321313		0.464908	0.472404	0.381079
446	0.434705	0.516381	0.470859		0.0540267	0.166266	0.031882		0.464603	0.469185	0.378936
447	0.435892	0.517776	0.475504		0.054277	0.167307	0.0321211		0.465783	0.469959	0.377284
448	0.432256	0.517765	0.469746		0.0538343	0.16768	0.0326582		0.464516	0.468915	0.378801
449	0.434536	0.519024	0.469685		0.0540683	0.165436	0.0318836		0.465777	0.469734	0.374465
450	0.434467	0.516795	0.47173		0.0541445	0.16772	0.0320903		0.467532	0.469195	0.374683
451	0.436023	0.518205	0.470296		0.0541135	0.1658	0.0316345		0.464078	0.4692	0.375484
452	0.435109	0.518078	0.472788		0.0538642	0.165113	0.0323779		0.464661	0.470635	0.376617
453	0.433663	0.517761	0.473044		0.0538278	0.166016	0.0318455		0.464647	0.469956	0.374777
454	0.434069	0.514749	0.465678		0.0538006	0.165706	0.0313394		0.46487	0.468066	0.375929
455	0.433871	0.517396	0.470853		0.0539327	0.167516	0.0318258		0.464467	0.469725	0.373298
456	0.434397	0.51777	0.470884		0.0535057	0.167964	0.031393		0.464979	0.466126	0.375944
457	0.433883	0.516252	0.464736		0.0538417	0.166955	0.0315357		0.463801	0.470066	0.377375
458	0.432969	0.51861	0.46639		0.0537631	0.1664	0.0325723		0.464626	0.469448	0.375907
459	0.432871	0.518433	0.470043		0.0537621	0.166943	0.0319165		0.465026	0.469958	0.373255
460	0.433067	0.519587	0.471596		0.0535344	0.165923	0.0315466		0.463734	0.470082	0.370378
461	0.432061	0.51588	0.469568		0.0538893	0.165324	0.0313793		0.463477	0.466582	0.375008
462	0.433431	0.518787	0.466553		0.0539321	0.165227	0.0310307		0.46353	0.470452	0.370454
463	0.433384	0.512915	0.469131		0.053455	0.165465	0.0312665		0.464846	0.466285	0.372006
464	0.432576	0.516723	0.467578		0.0532846	0.164863	0.0317327		0.462626	0.46593	0.373171
465	0.433291	0.518246	0.470514		0.0535643	0.16477	0.0315136		0.462744	0.471687	0.370285
466	0.432554	0.518521	0.462121		0.0535918	0.165249	0.031973		0.461904	0.467564	0.369362
467	0.43274	0.514994	0.464928		0.0532816	0.165678	0.031754		0.462878	0.469413	0.371846
468	0.433741	0.516577	0.464032		0.0536101	0.164299	0.0313272		0.463262	0.465777	0.372792
469	0.432326	0.514234	0.462255		0.0534828	0.164496	0.0310189		0.463645	0.465812	0.369248
470	0.430957	0.516077	0.462618		0.0532375	0.16489	0.0315315		0.462779	0.466162	0.369642
471	0.431686	0.51315	0.460875		0.053447	0.164082	0.030945		0.462451	0.466094	0.369823
472	0.432219	0.519534	0.465846		0.0538347	0.164743	0.0305726		0.461126	0.464057	0.374941
473	0.432062	0.516132	0.46582		0.053117	0.164528	0.0305242		0.462898	0.467498	0.367214
474	0.432556	0.512502	0.462372		0.0532151	0.164145	0.0303651		0.462931	0.466869	0.371357
475	0.432119	0.511309	0.46163		0.0531523	0.163866	0.0307237		0.462638	0.467013	0.371106
476	0.430633	0.51445	0.45878		0.0530544	0.164481	0.0306244		0.461087	0.466966	0.374873
477	0.432304	0.516302	0.457587		0.0527	0.162795	0.0310404		0.462458	0.467513	0.369094
478	0.431221	0.510242	0.461964		0.0531103	0.164364	0.0304301		0.461245	0.465244	0.368692
479	0.42977	0.514834	0.459637		0.0531428	0.163686	0.0300972		0.461593	0.465368	0.369106
480	0.431242	0.511403	0.455987		0.0529394	0.163616	0.0301849		0.461504	0.465315	0.370213
481	0.432141	0.515096	0.457376		0.0532839	0.164403	0.0308767		0.461744	0.4635	0.371013
482	0.429779	0.513629	0.463005		0.0531437	0.163045	0.0305735		0.462861	0.464283	0.366257
483	0.428399	0.511146	0.461628		0.0530179	0.163805	0.0300166		0.461691	0.464592	0.367809
484	0.430907	0.51503	0.452471		0.0528868	0.163856	0.0303629		0.460808	0.468159	0.366587
485	0.429706	0.511919	0.463373		0.0528418	0.163456	0.0306225		0.46193	0.465662	0.367789
486	0.431508	0.515904	0.454682		0.052772	0.163234	0.0307419		0.460471	0.465781	0.364282
487	0.430212	0.514245	0.457789		0.052745	0.163336	0.0304308		0.461956	0.467032	0.368139
488	0.430061	0.513411	0.45658		0.0527469	0.163248	0.0306406		0.460689	0.460027	0.366246
489	0.428931	0.515153	0.456967		0.0531547	0.163783	0.0297457		0.460306	0.462294	0.366959
490	0.428842	0.517224	0.458374		0.0527734	0.163553	0.0300297		0.458603	0.46077	0.367008
491	0.429774	0.512883	0.45381		0.0525479	0.163593	0.0300954		0.459842	0.459202	0.363541
492	0.429177	0.510998	0.460386		0.0527428	0.163462	0.0302589		0.460079	0.464648	0.363071
493	0.428729	0.507009	0.462889		0.0529066	0.163575	0.0298241		0.459239	0.463408	0.361033
494	0.427654	0.503551	0.459404		0.0526965	0.163833	0.0299835		0.459316	0.463963	0.361593
495	0.428021	0.503776	0.460459		0.0526168	0.162703	0.0298096		0.460004	0.464463	0.36426
496	0.428486	0.50417	0.462615		0.0523832	0.163212	0.0299259		0.460267	0.464776	0.362728
497	0.428478	0.504621	0.463249		0.0526573	0.162834	0.0296398		0.458985	0.463122	0.362714
498	0.428004	0.509263	0.457401		0.0528506	0.162235	0.0296701		0.460431	0.464111	0.365151
499	0.428424	0.51165	0.455913		0.0525114	0.162104	0.0303135		0.460213	0.464746	0.36514
500	0.430696	0.508299	0.462212		0.0523704	0.161546	0.0293844		0.459246	0.465302	0.360873
501	0.428531	0.508924	0.457755		0.0527135	0.16305	0.0301747		0.459215	0.467188	0.363011
502	0.427118	0.511544	0.458034		0.0527605	0.161533	0.0294757		0.459932	0.46372	0.361257
503	0.427972	0.508783	0.452373		0.0524006	0.162052	0.0303493		0.459078	0.465366	0.362272
504	0.427237	0.510118	0.454624		0.0523029	0.162356	0.0294276		0.459042	0.463963	0.35955
505	0.426719	0.511484	0.454983		0.0522432	0.162876	0.0290535		0.459235	0.465448	0.361037
506	0.427721	0.507333	0.457121		0.0520271	0.161908	0.0298421		0.459072	0.464839	0.362689
507	0.427473	0.514473	0.457379		0.0521377	0.161743	0.0302497		0.45902	0.46523	0.358776
508	0.427755	0.510629	0.459052		0.0521601	0.1616	0.0296379		0.458467	0.4612	0.359417
509	0.426384	0.510134	0.456639		0.0521604	0.162261	0.0296205		0.458123	0.459373	0.358262
510	0.426351	0.511034	0.456384		0.0520218	0.162706	0.0294153		0.458043	0.459528	0.359908
511	0.425867	0.512736	0.452768		0.0519464	0.161222	0.0299238		0.457836	0.460801	0.361115
512	0.425384	0.508225	0.458875		0.0520537	0.161275	0.0296603		0.458474	0.457545	0.359079
513	0.42753	0.510929	0.454267		0.0521483	0.161866	0.0298336		0.457838	0.458745	0.357444
514	0.428158	0.508733	0.454755		0.0520676	0.161028	0.0300471		0.458361	0.458163	0.360127
515	0.426702	0.507241	0.454739		0.0520235	0.161023	0.0290279		0.457092	0.45878	0.358499
516	0.426514	0.511175	0.455604		0.0521415	0.160425	0.0292469		0.458921	0.457794	0.359708
517	0.42631	0.511272	0.447917		0.0521191	0.160744	0.0297654		0.457415	0.462393	0.356153
518	0.426676	0.510304	0.457187		0.0520837	0.160556	0.0298945		0.456853	0.461881	0.355889
519	0.426756	0.511829	0.451938		0.0520178	0.159846	0.0289578		0.458042	0.462292	0.358186
520	0.425316	0.505819	0.449208		0.0517967	0.161411	0.0291842		0.457346	0.462536	0.360579
521	0.426254	0.507471	0.449573		0.0519273	0.160141	0.0292387		0.45748	0.460816	0.353875
522	0.425103	0.50693	0.451895		0.0520424	0.16077	0.0297598		0.456029	0.461289	0.359099
523	0.423987	0.50041	0.451893		0.0518373	0.159997	0.0299757		0.457443	0.461031	0.353916
524	0.424935	0.502579	0.450158		0.0516664	0.160758	0.0294924		0.456697	0.46299	0.357587
525	0.424997	0.504419	0.449216		0.0517026	0.161051	0.0287467		0.45645	0.46337	0.35462
526	0.42649	0.509303	0.446704		0.0516621	0.16011	0.0290844		0.456468	0.460514	0.354099
527	0.42454	0.503881	0.445175		0.0516426	0.159608	0.0291794		0.456583	0.463687	0.351864
528	0.425341	0.499629	0.447384		0.0514531	0.16009	0.0293177		0.455705	0.461355	0.356628
529	0.42466	0.502718	0.449668		0.0518193	0.160138	0.0285857		0.456002	0.462073	0.35286
530	0.423667	0.508777	0.449287		0.051259	0.160076	0.0291611		0.456525	0.458566	0.350624
531	0.423946	0.50763	0.444717		0.0516874	0.159788	0.0290194		0.454845	0.45821	0.355552
532	0.424251	0.510085	0.444613		0.0512809	0.160333	0.0292621		0.456013	0.461235	0.355569
533	0.424743	0.508077	0.451413		0.0514246	0.160312	0.0288005		0.454801	0.459023	0.359578
534	0.424939	0.504532	0.446354		0.0516457	0.159914	0.0289911		0.454777	0.460172	0.353178
535	0.423274	0.509751	0.444862		0.0514823	0.159263	0.0288758		0.454834	0.455609	0.355301
536	0.423447	0.507058	0.446163		0.0514008	0.160051	0.0286817		0.454792	0.456128	0.355147
537	0.424103	0.507942	0.448893		0.0515923	0.158596	0.0287312		0.455693	0.456562	0.355026
538	0.422739	0.508593	0.446966		0.0513344	0.159486	0.0293269		0.456151	0.454263	0.352387
539	0.424136	0.506459	0.441869		0.0512634	0.159204	0.0285899		0.454231	0.455101	0.353704
540	0.423346	0.509384	0.443047		0.051294	0.160219	0.0287751		0.454353	0.4556	0.350679
541	0.422874	0.504305	0.447087		0.0510988	0.158677	0.0285948		0.45553	0.457325	0.353093
542	0.42195	0.504882	0.444383		0.0510332	0.158642	0.0283059		0.45638	0.455769	0.355375
543	0.423238	0.510288	0.445512		0.0510697	0.159288	0.0292569		0.455773	0.458065	0.353541
544	0.420725	0.506054	0.444145		0.0513579	0.159579	0.0283192		0.454472	0.456236	0.35198
545	0.422783	0.507095	0.442765		0.0513608	0.15908	0.028581		0.454057	0.455557	0.353784
546	0.422564	0.507283	0.447934		0.0510303	0.160192	0.029235		0.454833	0.461325	0.352739
547	0.42353	0.50311	0.444932		0.0511772	0.159371	0.0289211		0.453944	0.458914	0.350996
548	0.421102	0.503891	0.4426		0.0509386	0.159611	0.0288999		0.453917	0.462337	0.350098
549	0.421091	0.506005	0.442827		0.0512597	0.158107	0.0286324		0.452597	0.462502	0.352723
550	0.423634	0.508578	0.443838		0.0512524	0.158905	0.0284083		0.454288	0.458276	0.353612
551	0.421245	0.505545	0.445425		0.051191	0.157297	0.028694		0.453839	0.460337	0.348933
552	0.421958	0.501709	0.440938		0.0511323	0.1579	0.0282865		0.453657	0.4603	0.348243
553	0.423407	0.506557	0.445661		0.0507555	0.158118	0.0289274		0.453965	0.458896	0.348895
554	0.423273	0.505214	0.437623		0.0509328	0.158209	0.0278549		0.454351	0.458651	0.345986
555	0.421613	0.506693	0.445403		0.0510192	0.15775	0.0281214		0.455386	0.460515	0.348215
556	0.421973	0.505617	0.442421		0.0511121	0.158182	0.0279122		0.453449	0.4591	0.348964
557	0.4215	0.503405	0.441326		0.0508324	0.157126	0.0284137		0.452867	0.45922	0.349408
558	0.420279	0.506703	0.441622		0.05049	0.158255	0.0283447		0.453892	0.458163	0.347167
559	0.419744	0.505574	0.44746		0.0509168	0.157499	0.0283009		0.453641	0.4585	0.347424
560	0.421417	0.499544	0.441188		0.0505748	0.158176	0.0289134		0.453149	0.458163	0.347753
561	0.421523	0.496501	0.442645		0.0507337	0.157469	0.0278974		0.452507	0.456609	0.349539
562	0.420737	0.500196	0.443987		0.0507757	0.157901	0.0279879		0.452713	0.458454	0.346311
563	0.420035	0.499313	0.442118		0.0506894	0.157448	0.0281922		0.453239	0.457019	0.348831
564	0.420836	0.495168	0.435285		0.0505258	0.15762	0.0278864		0.452903	0.456614	0.348287
565	0.421714	0.494917	0.443174		0.0505333	0.158169	0.0280841		0.451751	0.454041	0.346093
566	0.420278	0.497871	0.442749		0.0507703	0.157983	0.0281768		0.452349	0.457539	0.34558
567	0.421142	0.499722	0.439428		0.0505524	0.156568	0.0279148		0.452532	0.458426	0.347832
568	0.420399	0.499982	0.437286		0.0503213	0.15744	0.02821		0.452027	0.455672	0.345278
569	0.419943	0.494318	0.440589		0.0506794	0.157049	0.0279445		0.451611	0.457372	0.341246
570	0.419049	0.49601	0.440406		0.0505376	0.15771	0.0277163		0.45103	0.458832	0.342739
571	0.421955	0.497128	0.437323		0.0506105	0.157137	0.0286758		0.451693	0.454895	0.344614
572	0.418449	0.498518	0.439312		0.0503755	0.156592	0.0284638		0.451549	0.455276	0.344576
573	0.419019	0.50262	0.437266		0.0506589	0.15729	0.0277356		0.451771	0.454286	0.343595
574	0.419676	0.503946	0.435445		0.0504011	0.157242	0.0279749		0.451616	0.45709	0.347194
575	0.418942	0.501326	0.444541		0.0503427	0.156923	0.0281842		0.45186	0.455615	0.345036
576	0.420213	0.50345	0.44457		0.0500751	0.15707	0.0284749		0.451016	0.456323	0.342516
577	0.419718	0.502264	0.436478		0.0503425	0.156755	0.0280857		0.452196	0.455379	0.341106
578	0.419861	0.502998	0.436711		0.0503415	0.157364	0.0276458		0.450217	0.455008	0.345063
579	0.420317	0.50081	0.433766		0.050225	0.156203	0.0278207		0.451145	0.45637	0.341862
580	0.419126	0.502086	0.439497		0.050211	0.156137	0.0278585		0.451192	0.454667	0.342144
581	0.41938	0.500518	0.431839		0.050342	0.155399	0.0277259		0.450525	0.458955	0.341731
582	0.420457	0.50053	0.436735		0.0503495	0.155676	0.0285234		0.451256	0.455303	0.34207
583	0.418359	0.500696	0.436202		0.0501951	0.156728	0.0278292		0.451688	0.457701	0.344225
584	0.419505	0.502546	0.435102		0.0502499	0.155822	0.0278684		0.451906	0.457305	0.341864
585	0.418237	0.502329	0.432865		0.0502914	0.155797	0.0282004		0.450136	0.453082	0.34197
586	0.416512	0.501017	0.435399		0.0503056	0.155711	0.027611		0.450215	0.453162	0.345233
587	0.417046	0.499448	0.436576		0.0498842	0.155933	0.0280541		0.450598	0.456135	0.341021
588	0.41737	0.498734	0.432153		0.0501659	0.156042	0.027969		0.449892	0.453889	0.340712
589	0.418042	0.500006	0.432598		0.0499785	0.1552	0.0280963		0.450161	0.454726	0.338863
590	0.417478	0.503605	0.431813		0.0499634	0.155238	0.0280057		0.449155	0.456281	0.341925
591	0.417962	0.500316	0.432471		0.0500258	0.155393	0.0282746		0.449568	0.455214	0.340945
592	0.416604	0.501759	0.433956		0.0499558	0.154853	0.0278536		0.450397	0.454907	0.340835
593	0.415755	0.500113	0.437628		0.050106	0.155053	0.0277872		0.44901	0.453848	0.342284
594	0.418345	0.496761	0.43082		0.0498539	0.15493	0.0272328		0.450239	0.454231	0.342246
595	0.417064	0.502894	0.435399		0.0499835	0.155694	0.0270775		0.449827	0.454278	0.336271
596	0.417262	0.499966	0.433809		0.0497276	0.155602	0.0277405		0.450156	0.45458	0.342764
597	0.41775	0.499551	0.430957		0.0497785	0.155138	0.0275307		0.449007	0.454081	0.338361
598	0.418008	0.501244	0.429558		0.0502312	0.155244	0.0275382		0.448978	0.455599	0.339467
599	0.415246	0.498046	0.430905		0.0498236	0.154492	0.0280176		0.449097	0.454267	0.338293
600	0.41736	0.502062	0.435381		0.0497609	0.154762	0.0273845		0.44927	0.453294	0.339331
	#DIV/0!	#DIV/0!	#DIV/0!		#DIV/0!	#DIV/0!	#DIV/0!		#DIV/0!	#DIV/0!	#DIV/0!
	#DIV/0!	#DIV/0!	#DIV/0!		#DIV/0!	#DIV/0!	#DIV/0!		#DIV/0!	#DIV/0!	#DIV/0!
	#DIV/0!	#DIV/0!	#DIV/0!		#DIV/0!	#DIV/0!	#DIV/0!		#DIV/0!	#DIV/0!	#DIV/0!
	#DIV/0!	#DIV/0!	#DIV/0!		#DIV/0!	#DIV/0!	#DIV/0!		#DIV/0!	#DIV/0!	#DIV/0!
	#DIV/0!	#DIV/0!	#DIV/0!		#DIV/0!	#DIV/0!	#DIV/0!		#DIV/0!	#DIV/0!	#DIV/0!
	#DIV/0!	#DIV/0!	#DIV/0!		#DIV/0!	#DIV/0!	#DIV/0!		#DIV/0!	#DIV/0!	#DIV/0!
	#DIV/0!	#DIV/0!	#DIV/0!		#DIV/0!	#DIV/0!	#DIV/0!		#DIV/0!	#DIV/0!	#DIV/0!
	#DIV/0!	#DIV/0!	#DIV/0!		#DIV/0!	#DIV/0!	#DIV/0!		#DIV/0!	#DIV/0!	#DIV/0!
	#DIV/0!	#DIV/0!	#DIV/0!		#DIV/0!	#DIV/0!	#DIV/0!		#DIV/0!	#DIV/0!	#DIV/0!
	#DIV/0!	#DIV/0!	#DIV/0!		#DIV/0!	#DIV/0!	#DIV/0!		#DIV/0!	#DIV/0!	#DIV/0!
	#DIV/0!	#DIV/0!	#DIV/0!		#DIV/0!	#DIV/0!	#DIV/0!		#DIV/0!	#DIV/0!	#DIV/0!
	#DIV/0!	#DIV/0!	#DIV/0!		#DIV/0!	#DIV/0!	#DIV/0!		#DIV/0!	#DIV/0!	#DIV/0!
	#DIV/0!	#DIV/0!	#DIV/0!		#DIV/0!	#DIV/0!	#DIV/0!		#DIV/0!	#DIV/0!	#DIV/0!
	#DIV/0!	#DIV/0!	#DIV/0!		#DIV/0!	#DIV/0!	#DIV/0!		#DIV/0!	#DIV/0!	#DIV/0!
	#DIV/0!	#DIV/0!	#DIV/0!		#DIV/0!	#DIV/0!	#DIV/0!		#DIV/0!	#DIV/0!	#DIV/0!
	#DIV/0!	#DIV/0!	#DIV/0!		#DIV/0!	#DIV/0!	#DIV/0!		#DIV/0!	#DIV/0!	#DIV/0!
	#DIV/0!	#DIV/0!	#DIV/0!		#DIV/0!	#DIV/0!	#DIV/0!		#DIV/0!	#DIV/0!	#DIV/0!
	#DIV/0!	#DIV/0!	#DIV/0!		#DIV/0!	#DIV/0!	#DIV/0!		#DIV/0!	#DIV/0!	#DIV/0!
	#DIV/0!	#DIV/0!	#DIV/0!		#DIV/0!	#DIV/0!	#DIV/0!		#DIV/0!	#DIV/0!	#DIV/0!
	#DIV/0!	#DIV/0!	#DIV/0!		#DIV/0!	#DIV/0!	#DIV/0!		#DIV/0!	#DIV/0!	#DIV/0!
	#DIV/0!	#DIV/0!	#DIV/0!		#DIV/0!	#DIV/0!	#DIV/0!		#DIV/0!	#DIV/0!	#DIV/0!
	#DIV/0!	#DIV/0!	#DIV/0!		#DIV/0!	#DIV/0!	#DIV/0!		#DIV/0!	#DIV/0!	#DIV/0!
	#DIV/0!	#DIV/0!	#DIV/0!		#DIV/0!	#DIV/0!	#DIV/0!		#DIV/0!	#DIV/0!	#DIV/0!
	#DIV/0!	#DIV/0!	#DIV/0!		#DIV/0!	#DIV/0!	#DIV/0!		#DIV/0!	#DIV/0!	#DIV/0!
	#DIV/0!	#DIV/0!	#DIV/0!		#DIV/0!	#DIV/0!	#DIV/0!		#DIV/0!	#DIV/0!	#DIV/0!
	#DIV/0!	#DIV/0!	#DIV/0!		#DIV/0!	#DIV/0!	#DIV/0!		#DIV/0!	#DIV/0!	#DIV/0!
	#DIV/0!	#DIV/0!	#DIV/0!		#DIV/0!	#DIV/0!	#DIV/0!		#DIV/0!	#DIV/0!	#DIV/0!
	#DIV/0!	#DIV/0!	#DIV/0!		#DIV/0!	#DIV/0!	#DIV/0!		#DIV/0!	#DIV/0!	#DIV/0!
	#DIV/0!	#DIV/0!	#DIV/0!		#DIV/0!	#DIV/0!	#DIV/0!		#DIV/0!	#DIV/0!	#DIV/0!
	#DIV/0!	#DIV/0!	#DIV/0!		#DIV/0!	#DIV/0!	#DIV/0!		#DIV/0!	#DIV/0!	#DIV/0!
	#DIV/0!	#DIV/0!	#DIV/0!		#DIV/0!	#DIV/0!	#DIV/0!		#DIV/0!	#DIV/0!	#DIV/0!
	#DIV/0!	#DIV/0!	#DIV/0!		#DIV/0!	#DIV/0!	#DIV/0!		#DIV/0!	#DIV/0!	#DIV/0!
	#DIV/0!	#DIV/0!	#DIV/0!		#DIV/0!	#DIV/0!	#DIV/0!		#DIV/0!	#DIV/0!	#DIV/0!
	#DIV/0!	#DIV/0!	#DIV/0!		#DIV/0!	#DIV/0!	#DIV/0!		#DIV/0!	#DIV/0!	#DIV/0!
	#DIV/0!	#DIV/0!	#DIV/0!		#DIV/0!	#DIV/0!	#DIV/0!		#DIV/0!	#DIV/0!	#DIV/0!
	#DIV/0!	#DIV/0!	#DIV/0!		#DIV/0!	#DIV/0!	#DIV/0!		#DIV/0!	#DIV/0!	#DIV/0!
	#DIV/0!	#DIV/0!	#DIV/0!		#DIV/0!	#DIV/0!	#DIV/0!		#DIV/0!	#DIV/0!	#DIV/0!
	#DIV/0!	#DIV/0!	#DIV/0!		#DIV/0!	#DIV/0!	#DIV/0!		#DIV/0!	#DIV/0!	#DIV/0!
	#DIV/0!	#DIV/0!	#DIV/0!		#DIV/0!	#DIV/0!	#DIV/0!		#DIV/0!	#DIV/0!	#DIV/0!
	#DIV/0!	#DIV/0!	#DIV/0!		#DIV/0!	#DIV/0!	#DIV/0!		#DIV/0!	#DIV/0!	#DIV/0!
	#DIV/0!	#DIV/0!	#DIV/0!		#DIV/0!	#DIV/0!	#DIV/0!		#DIV/0!	#DIV/0!	#DIV/0!
	#DIV/0!	#DIV/0!	#DIV/0!		#DIV/0!	#DIV/0!	#DIV/0!		#DIV/0!	#DIV/0!	#DIV/0!
	#DIV/0!	#DIV/0!	#DIV/0!		#DIV/0!	#DIV/0!	#DIV/0!		#DIV/0!	#DIV/0!	#DIV/0!
	#DIV/0!	#DIV/0!	#DIV/0!		#DIV/0!	#DIV/0!	#DIV/0!		#DIV/0!	#DIV/0!	#DIV/0!
	#DIV/0!	#DIV/0!	#DIV/0!		#DIV/0!	#DIV/0!	#DIV/0!		#DIV/0!	#DIV/0!	#DIV/0!
	#DIV/0!	#DIV/0!	#DIV/0!		#DIV/0!	#DIV/0!	#DIV/0!		#DIV/0!	#DIV/0!	#DIV/0!
	#DIV/0!	#DIV/0!	#DIV/0!		#DIV/0!	#DIV/0!	#DIV/0!		#DIV/0!	#DIV/0!	#DIV/0!
	#DIV/0!	#DIV/0!	#DIV/0!		#DIV/0!	#DIV/0!	#DIV/0!		#DIV/0!	#DIV/0!	#DIV/0!
	#DIV/0!	#DIV/0!	#DIV/0!		#DIV/0!	#DIV/0!	#DIV/0!		#DIV/0!	#DIV/0!	#DIV/0!
	#DIV/0!	#DIV/0!	#DIV/0!		#DIV/0!	#DIV/0!	#DIV/0!		#DIV/0!	#DIV/0!	#DIV/0!
	#DIV/0!	#DIV/0!	#DIV/0!		#DIV/0!	#DIV/0!	#DIV/0!		#DIV/0!	#DIV/0!	#DIV/0!
	#DIV/0!	#DIV/0!	#DIV/0!		#DIV/0!	#DIV/0!	#DIV/0!		#DIV/0!	#DIV/0!	#DIV/0!
	#DIV/0!	#DIV/0!	#DIV/0!		#DIV/0!	#DIV/0!	#DIV/0!		#DIV/0!	#DIV/0!	#DIV/0!
	#DIV/0!	#DIV/0!	#DIV/0!		#DIV/0!	#DIV/0!	#DIV/0!		#DIV/0!	#DIV/0!	#DIV/0!
	#DIV/0!	#DIV/0!	#DIV/0!		#DIV/0!	#DIV/0!	#DIV/0!		#DIV/0!	#DIV/0!	#DIV/0!
	#DIV/0!	#DIV/0!	#DIV/0!		#DIV/0!	#DIV/0!	#DIV/0!		#DIV/0!	#DIV/0!	#DIV/0!
	#DIV/0!	#DIV/0!	#DIV/0!		#DIV/0!	#DIV/0!	#DIV/0!		#DIV/0!	#DIV/0!	#DIV/0!
	#DIV/0!	#DIV/0!	#DIV/0!		#DIV/0!	#DIV/0!	#DIV/0!		#DIV/0!	#DIV/0!	#DIV/0!
	#DIV/0!	#DIV/0!	#DIV/0!		#DIV/0!	#DIV/0!	#DIV/0!		#DIV/0!	#DIV/0!	#DIV/0!
	#DIV/0!	#DIV/0!	#DIV/0!		#DIV/0!	#DIV/0!	#DIV/0!		#DIV/0!	#DIV/0!	#DIV/0!
	#DIV/0!	#DIV/0!	#DIV/0!		#DIV/0!	#DIV/0!	#DIV/0!		#DIV/0!	#DIV/0!	#DIV/0!
	#DIV/0!	#DIV/0!	#DIV/0!		#DIV/0!	#DIV/0!	#DIV/0!		#DIV/0!	#DIV/0!	#DIV/0!
	#DIV/0!	#DIV/0!	#DIV/0!		#DIV/0!	#DIV/0!	#DIV/0!		#DIV/0!	#DIV/0!	#DIV/0!
	#DIV/0!	#DIV/0!	#DIV/0!		#DIV/0!	#DIV/0!	#DIV/0!		#DIV/0!	#DIV/0!	#DIV/0!
	#DIV/0!	#DIV/0!	#DIV/0!		#DIV/0!	#DIV/0!	#DIV/0!		#DIV/0!	#DIV/0!	#DIV/0!
	#DIV/0!	#DIV/0!	#DIV/0!		#DIV/0!	#DIV/0!	#DIV/0!		#DIV/0!	#DIV/0!	#DIV/0!
	#DIV/0!	#DIV/0!	#DIV/0!		#DIV/0!	#DIV/0!	#DIV/0!		#DIV/0!	#DIV/0!	#DIV/0!
	#DIV/0!	#DIV/0!	#DIV/0!		#DIV/0!	#DIV/0!	#DIV/0!		#DIV/0!	#DIV/0!	#DIV/0!
	#DIV/0!	#DIV/0!	#DIV/0!		#DIV/0!	#DIV/0!	#DIV/0!		#DIV/0!	#DIV/0!	#DIV/0!
	#DIV/0!	#DIV/0!	#DIV/0!		#DIV/0!	#DIV/0!	#DIV/0!		#DIV/0!	#DIV/0!	#DIV/0!
	#DIV/0!	#DIV/0!	#DIV/0!		#DIV/0!	#DIV/0!	#DIV/0!		#DIV/0!	#DIV/0!	#DIV/0!
	#DIV/0!	#DIV/0!	#DIV/0!		#DIV/0!	#DIV/0!	#DIV/0!		#DIV/0!	#DIV/0!	#DIV/0!
	#DIV/0!	#DIV/0!	#DIV/0!		#DIV/0!	#DIV/0!	#DIV/0!		#DIV/0!	#DIV/0!	#DIV/0!
	#DIV/0!	#DIV/0!	#DIV/0!		#DIV/0!	#DIV/0!	#DIV/0!		#DIV/0!	#DIV/0!	#DIV/0!
	#DIV/0!	#DIV/0!	#DIV/0!		#DIV/0!	#DIV/0!	#DIV/0!		#DIV/0!	#DIV/0!	#DIV/0!
	#DIV/0!	#DIV/0!	#DIV/0!		#DIV/0!	#DIV/0!	#DIV/0!		#DIV/0!	#DIV/0!	#DIV/0!
	#DIV/0!	#DIV/0!	#DIV/0!		#DIV/0!	#DIV/0!	#DIV/0!		#DIV/0!	#DIV/0!	#DIV/0!
	#DIV/0!	#DIV/0!	#DIV/0!		#DIV/0!	#DIV/0!	#DIV/0!		#DIV/0!	#DIV/0!	#DIV/0!
	#DIV/0!	#DIV/0!	#DIV/0!		#DIV/0!	#DIV/0!	#DIV/0!		#DIV/0!	#DIV/0!	#DIV/0!
	#DIV/0!	#DIV/0!	#DIV/0!		#DIV/0!	#DIV/0!	#DIV/0!		#DIV/0!	#DIV/0!	#DIV/0!
	#DIV/0!	#DIV/0!	#DIV/0!		#DIV/0!	#DIV/0!	#DIV/0!		#DIV/0!	#DIV/0!	#DIV/0!
	#DIV/0!	#DIV/0!	#DIV/0!		#DIV/0!	#DIV/0!	#DIV/0!		#DIV/0!	#DIV/0!	#DIV/0!
	#DIV/0!	#DIV/0!	#DIV/0!		#DIV/0!	#DIV/0!	#DIV/0!		#DIV/0!	#DIV/0!	#DIV/0!
	#DIV/0!	#DIV/0!	#DIV/0!		#DIV/0!	#DIV/0!	#DIV/0!		#DIV/0!	#DIV/0!	#DIV/0!
	#DIV/0!	#DIV/0!	#DIV/0!		#DIV/0!	#DIV/0!	#DIV/0!		#DIV/0!	#DIV/0!	#DIV/0!
	#DIV/0!	#DIV/0!	#DIV/0!		#DIV/0!	#DIV/0!	#DIV/0!		#DIV/0!	#DIV/0!	#DIV/0!
	#DIV/0!	#DIV/0!	#DIV/0!		#DIV/0!	#DIV/0!	#DIV/0!		#DIV/0!	#DIV/0!	#DIV/0!
	#DIV/0!	#DIV/0!	#DIV/0!		#DIV/0!	#DIV/0!	#DIV/0!		#DIV/0!	#DIV/0!	#DIV/0!
	#DIV/0!	#DIV/0!	#DIV/0!		#DIV/0!	#DIV/0!	#DIV/0!		#DIV/0!	#DIV/0!	#DIV/0!
	#DIV/0!	#DIV/0!	#DIV/0!		#DIV/0!	#DIV/0!	#DIV/0!		#DIV/0!	#DIV/0!	#DIV/0!
	#DIV/0!	#DIV/0!	#DIV/0!		#DIV/0!	#DIV/0!	#DIV/0!		#DIV/0!	#DIV/0!	#DIV/0!
	#DIV/0!	#DIV/0!	#DIV/0!		#DIV/0!	#DIV/0!	#DIV/0!		#DIV/0!	#DIV/0!	#DIV/0!
	#DIV/0!	#DIV/0!	#DIV/0!		#DIV/0!	#DIV/0!	#DIV/0!		#DIV/0!	#DIV/0!	#DIV/0!
	#DIV/0!	#DIV/0!	#DIV/0!		#DIV/0!	#DIV/0!	#DIV/0!		#DIV/0!	#DIV/0!	#DIV/0!
	#DIV/0!	#DIV/0!	#DIV/0!		#DIV/0!	#DIV/0!	#DIV/0!		#DIV/0!	#DIV/0!	#DIV/0!
	#DIV/0!	#DIV/0!	#DIV/0!		#DIV/0!	#DIV/0!	#DIV/0!		#DIV/0!	#DIV/0!	#DIV/0!
	#DIV/0!	#DIV/0!	#DIV/0!		#DIV/0!	#DIV/0!	#DIV/0!		#DIV/0!	#DIV/0!	#DIV/0!
	#DIV/0!	#DIV/0!	#DIV/0!		#DIV/0!	#DIV/0!	#DIV/0!		#DIV/0!	#DIV/0!	#DIV/0!
	#DIV/0!	#DIV/0!	#DIV/0!		#DIV/0!	#DIV/0!	#DIV/0!		#DIV/0!	#DIV/0!	#DIV/0!
	#DIV/0!	#DIV/0!	#DIV/0!		#DIV/0!	#DIV/0!	#DIV/0!		#DIV/0!	#DIV/0!	#DIV/0!
	#DIV/0!	#DIV/0!	#DIV/0!		#DIV/0!	#DIV/0!	#DIV/0!		#DIV/0!	#DIV/0!	#DIV/0!
	#DIV/0!	#DIV/0!	#DIV/0!		#DIV/0!	#DIV/0!	#DIV/0!		#DIV/0!	#DIV/0!	#DIV/0!
	#DIV/0!	#DIV/0!	#DIV/0!		#DIV/0!	#DIV/0!	#DIV/0!		#DIV/0!	#DIV/0!	#DIV/0!
	#DIV/0!	#DIV/0!	#DIV/0!		#DIV/0!	#DIV/0!	#DIV/0!		#DIV/0!	#DIV/0!	#DIV/0!
	#DIV/0!	#DIV/0!	#DIV/0!		#DIV/0!	#DIV/0!	#DIV/0!		#DIV/0!	#DIV/0!	#DIV/0!
	#DIV/0!	#DIV/0!	#DIV/0!		#DIV/0!	#DIV/0!	#DIV/0!		#DIV/0!	#DIV/0!	#DIV/0!
	#DIV/0!	#DIV/0!	#DIV/0!		#DIV/0!	#DIV/0!	#DIV/0!		#DIV/0!	#DIV/0!	#DIV/0!
	#DIV/0!	#DIV/0!	#DIV/0!		#DIV/0!	#DIV/0!	#DIV/0!		#DIV/0!	#DIV/0!	#DIV/0!
	#DIV/0!	#DIV/0!	#DIV/0!		#DIV/0!	#DIV/0!	#DIV/0!		#DIV/0!	#DIV/0!	#DIV/0!
	#DIV/0!	#DIV/0!	#DIV/0!		#DIV/0!	#DIV/0!	#DIV/0!		#DIV/0!	#DIV/0!	#DIV/0!
	#DIV/0!	#DIV/0!	#DIV/0!		#DIV/0!	#DIV/0!	#DIV/0!		#DIV/0!	#DIV/0!	#DIV/0!
	#DIV/0!	#DIV/0!	#DIV/0!		#DIV/0!	#DIV/0!	#DIV/0!		#DIV/0!	#DIV/0!	#DIV/0!
	#DIV/0!	#DIV/0!	#DIV/0!		#DIV/0!	#DIV/0!	#DIV/0!		#DIV/0!	#DIV/0!	#DIV/0!
	#DIV/0!	#DIV/0!	#DIV/0!		#DIV/0!	#DIV/0!	#DIV/0!		#DIV/0!	#DIV/0!	#DIV/0!
	#DIV/0!	#DIV/0!	#DIV/0!		#DIV/0!	#DIV/0!	#DIV/0!		#DIV/0!	#DIV/0!	#DIV/0!
	#DIV/0!	#DIV/0!	#DIV/0!		#DIV/0!	#DIV/0!	#DIV/0!		#DIV/0!	#DIV/0!	#DIV/0!
	#DIV/0!	#DIV/0!	#DIV/0!		#DIV/0!	#DIV/0!	#DIV/0!		#DIV/0!	#DIV/0!	#DIV/0!
	#DIV/0!	#DIV/0!	#DIV/0!		#DIV/0!	#DIV/0!	#DIV/0!		#DIV/0!	#DIV/0!	#DIV/0!
	#DIV/0!	#DIV/0!	#DIV/0!		#DIV/0!	#DIV/0!	#DIV/0!		#DIV/0!	#DIV/0!	#DIV/0!
	#DIV/0!	#DIV/0!	#DIV/0!		#DIV/0!	#DIV/0!	#DIV/0!		#DIV/0!	#DIV/0!	#DIV/0!
	#DIV/0!	#DIV/0!	#DIV/0!		#DIV/0!	#DIV/0!	#DIV/0!		#DIV/0!	#DIV/0!	#DIV/0!
	#DIV/0!	#DIV/0!	#DIV/0!		#DIV/0!	#DIV/0!	#DIV/0!		#DIV/0!	#DIV/0!	#DIV/0!
	#DIV/0!	#DIV/0!	#DIV/0!		#DIV/0!	#DIV/0!	#DIV/0!		#DIV/0!	#DIV/0!	#DIV/0!
	#DIV/0!	#DIV/0!	#DIV/0!		#DIV/0!	#DIV/0!	#DIV/0!		#DIV/0!	#DIV/0!	#DIV/0!
	#DIV/0!	#DIV/0!	#DIV/0!		#DIV/0!	#DIV/0!	#DIV/0!		#DIV/0!	#DIV/0!	#DIV/0!
	#DIV/0!	#DIV/0!	#DIV/0!		#DIV/0!	#DIV/0!	#DIV/0!		#DIV/0!	#DIV/0!	#DIV/0!
	#DIV/0!	#DIV/0!	#DIV/0!		#DIV/0!	#DIV/0!	#DIV/0!		#DIV/0!	#DIV/0!	#DIV/0!
	#DIV/0!	#DIV/0!	#DIV/0!		#DIV/0!	#DIV/0!	#DIV/0!		#DIV/0!	#DIV/0!	#DIV/0!
	#DIV/0!	#DIV/0!	#DIV/0!		#DIV/0!	#DIV/0!	#DIV/0!		#DIV/0!	#DIV/0!	#DIV/0!
	#DIV/0!	#DIV/0!	#DIV/0!		#DIV/0!	#DIV/0!	#DIV/0!		#DIV/0!	#DIV/0!	#DIV/0!
	#DIV/0!	#DIV/0!	#DIV/0!		#DIV/0!	#DIV/0!	#DIV/0!		#DIV/0!	#DIV/0!	#DIV/0!
	#DIV/0!	#DIV/0!	#DIV/0!		#DIV/0!	#DIV/0!	#DIV/0!		#DIV/0!	#DIV/0!	#DIV/0!
	#DIV/0!	#DIV/0!	#DIV/0!		#DIV/0!	#DIV/0!	#DIV/0!		#DIV/0!	#DIV/0!	#DIV/0!
	#DIV/0!	#DIV/0!	#DIV/0!		#DIV/0!	#DIV/0!	#DIV/0!		#DIV/0!	#DIV/0!	#DIV/0!
	#DIV/0!	#DIV/0!	#DIV/0!		#DIV/0!	#DIV/0!	#DIV/0!		#DIV/0!	#DIV/0!	#DIV/0!
	#DIV/0!	#DIV/0!	#DIV/0!		#DIV/0!	#DIV/0!	#DIV/0!		#DIV/0!	#DIV/0!	#DIV/0!
	#DIV/0!	#DIV/0!	#DIV/0!		#DIV/0!	#DIV/0!	#DIV/0!		#DIV/0!	#DIV/0!	#DIV/0!
	#DIV/0!	#DIV/0!	#DIV/0!		#DIV/0!	#DIV/0!	#DIV/0!		#DIV/0!	#DIV/0!	#DIV/0!
	#DIV/0!	#DIV/0!	#DIV/0!		#DIV/0!	#DIV/0!	#DIV/0!		#DIV/0!	#DIV/0!	#DIV/0!
	#DIV/0!	#DIV/0!	#DIV/0!		#DIV/0!	#DIV/0!	#DIV/0!		#DIV/0!	#DIV/0!	#DIV/0!
	#DIV/0!	#DIV/0!	#DIV/0!		#DIV/0!	#DIV/0!	#DIV/0!		#DIV/0!	#DIV/0!	#DIV/0!
	#DIV/0!	#DIV/0!	#DIV/0!		#DIV/0!	#DIV/0!	#DIV/0!		#DIV/0!	#DIV/0!	#DIV/0!
	#DIV/0!	#DIV/0!	#DIV/0!		#DIV/0!	#DIV/0!	#DIV/0!		#DIV/0!	#DIV/0!	#DIV/0!
	#DIV/0!	#DIV/0!	#DIV/0!		#DIV/0!	#DIV/0!	#DIV/0!		#DIV/0!	#DIV/0!	#DIV/0!
	#DIV/0!	#DIV/0!	#DIV/0!		#DIV/0!	#DIV/0!	#DIV/0!		#DIV/0!	#DIV/0!	#DIV/0!
	#DIV/0!	#DIV/0!	#DIV/0!		#DIV/0!	#DIV/0!	#DIV/0!		#DIV/0!	#DIV/0!	#DIV/0!
	#DIV/0!	#DIV/0!	#DIV/0!		#DIV/0!	#DIV/0!	#DIV/0!		#DIV/0!	#DIV/0!	#DIV/0!
	#DIV/0!	#DIV/0!	#DIV/0!		#DIV/0!	#DIV/0!	#DIV/0!		#DIV/0!	#DIV/0!	#DIV/0!
	#DIV/0!	#DIV/0!	#DIV/0!		#DIV/0!	#DIV/0!	#DIV/0!		#DIV/0!	#DIV/0!	#DIV/0!
	#DIV/0!	#DIV/0!	#DIV/0!		#DIV/0!	#DIV/0!	#DIV/0!		#DIV/0!	#DIV/0!	#DIV/0!
	#DIV/0!	#DIV/0!	#DIV/0!		#DIV/0!	#DIV/0!	#DIV/0!		#DIV/0!	#DIV/0!	#DIV/0!
	#DIV/0!	#DIV/0!	#DIV/0!		#DIV/0!	#DIV/0!	#DIV/0!		#DIV/0!	#DIV/0!	#DIV/0!
	#DIV/0!	#DIV/0!	#DIV/0!		#DIV/0!	#DIV/0!	#DIV/0!		#DIV/0!	#DIV/0!	#DIV/0!
	#DIV/0!	#DIV/0!	#DIV/0!		#DIV/0!	#DIV/0!	#DIV/0!		#DIV/0!	#DIV/0!	#DIV/0!
	#DIV/0!	#DIV/0!	#DIV/0!		#DIV/0!	#DIV/0!	#DIV/0!		#DIV/0!	#DIV/0!	#DIV/0!
	#DIV/0!	#DIV/0!	#DIV/0!		#DIV/0!	#DIV/0!	#DIV/0!		#DIV/0!	#DIV/0!	#DIV/0!
	#DIV/0!	#DIV/0!	#DIV/0!		#DIV/0!	#DIV/0!	#DIV/0!		#DIV/0!	#DIV/0!	#DIV/0!
	#DIV/0!	#DIV/0!	#DIV/0!		#DIV/0!	#DIV/0!	#DIV/0!		#DIV/0!	#DIV/0!	#DIV/0!
	#DIV/0!	#DIV/0!	#DIV/0!		#DIV/0!	#DIV/0!	#DIV/0!		#DIV/0!	#DIV/0!	#DIV/0!
	#DIV/0!	#DIV/0!	#DIV/0!		#DIV/0!	#DIV/0!	#DIV/0!		#DIV/0!	#DIV/0!	#DIV/0!
	#DIV/0!	#DIV/0!	#DIV/0!		#DIV/0!	#DIV/0!	#DIV/0!		#DIV/0!	#DIV/0!	#DIV/0!
	#DIV/0!	#DIV/0!	#DIV/0!		#DIV/0!	#DIV/0!	#DIV/0!		#DIV/0!	#DIV/0!	#DIV/0!
	#DIV/0!	#DIV/0!	#DIV/0!		#DIV/0!	#DIV/0!	#DIV/0!		#DIV/0!	#DIV/0!	#DIV/0!
	#DIV/0!	#DIV/0!	#DIV/0!		#DIV/0!	#DIV/0!	#DIV/0!		#DIV/0!	#DIV/0!	#DIV/0!
	#DIV/0!	#DIV/0!	#DIV/0!		#DIV/0!	#DIV/0!	#DIV/0!		#DIV/0!	#DIV/0!	#DIV/0!
	#DIV/0!	#DIV/0!	#DIV/0!		#DIV/0!	#DIV/0!	#DIV/0!		#DIV/0!	#DIV/0!	#DIV/0!
	#DIV/0!	#DIV/0!	#DIV/0!		#DIV/0!	#DIV/0!	#DIV/0!		#DIV/0!	#DIV/0!	#DIV/0!
	#DIV/0!	#DIV/0!	#DIV/0!		#DIV/0!	#DIV/0!	#DIV/0!		#DIV/0!	#DIV/0!	#DIV/0!
	#DIV/0!	#DIV/0!	#DIV/0!		#DIV/0!	#DIV/0!	#DIV/0!		#DIV/0!	#DIV/0!	#DIV/0!
	#DIV/0!	#DIV/0!	#DIV/0!		#DIV/0!	#DIV/0!	#DIV/0!		#DIV/0!	#DIV/0!	#DIV/0!
	#DIV/0!	#DIV/0!	#DIV/0!		#DIV/0!	#DIV/0!	#DIV/0!		#DIV/0!	#DIV/0!	#DIV/0!
	#DIV/0!	#DIV/0!	#DIV/0!		#DIV/0!	#DIV/0!	#DIV/0!		#DIV/0!	#DIV/0!	#DIV/0!
	#DIV/0!	#DIV/0!	#DIV/0!		#DIV/0!	#DIV/0!	#DIV/0!		#DIV/0!	#DIV/0!	#DIV/0!
	#DIV/0!	#DIV/0!	#DIV/0!		#DIV/0!	#DIV/0!	#DIV/0!		#DIV/0!	#DIV/0!	#DIV/0!
	#DIV/0!	#DIV/0!	#DIV/0!		#DIV/0!	#DIV/0!	#DIV/0!		#DIV/0!	#DIV/0!	#DIV/0!
	#DIV/0!	#DIV/0!	#DIV/0!		#DIV/0!	#DIV/0!	#DIV/0!		#DIV/0!	#DIV/0!	#DIV/0!
	#DIV/0!	#DIV/0!	#DIV/0!		#DIV/0!	#DIV/0!	#DIV/0!		#DIV/0!	#DIV/0!	#DIV/0!
	#DIV/0!	#DIV/0!	#DIV/0!		#DIV/0!	#DIV/0!	#DIV/0!		#DIV/0!	#DIV/0!	#DIV/0!
	#DIV/0!	#DIV/0!	#DIV/0!		#DIV/0!	#DIV/0!	#DIV/0!		#DIV/0!	#DIV/0!	#DIV/0!
	#DIV/0!	#DIV/0!	#DIV/0!		#DIV/0!	#DIV/0!	#DIV/0!		#DIV/0!	#DIV/0!	#DIV/0!
	#DIV/0!	#DIV/0!	#DIV/0!		#DIV/0!	#DIV/0!	#DIV/0!		#DIV/0!	#DIV/0!	#DIV/0!
	#DIV/0!	#DIV/0!	#DIV/0!		#DIV/0!	#DIV/0!	#DIV/0!		#DIV/0!	#DIV/0!	#DIV/0!
	#DIV/0!	#DIV/0!	#DIV/0!		#DIV/0!	#DIV/0!	#DIV/0!		#DIV/0!	#DIV/0!	#DIV/0!
	#DIV/0!	#DIV/0!	#DIV/0!		#DIV/0!	#DIV/0!	#DIV/0!		#DIV/0!	#DIV/0!	#DIV/0!
	#DIV/0!	#DIV/0!	#DIV/0!		#DIV/0!	#DIV/0!	#DIV/0!		#DIV/0!	#DIV/0!	#DIV/0!
	#DIV/0!	#DIV/0!	#DIV/0!		#DIV/0!	#DIV/0!	#DIV/0!		#DIV/0!	#DIV/0!	#DIV/0!
	#DIV/0!	#DIV/0!	#DIV/0!		#DIV/0!	#DIV/0!	#DIV/0!		#DIV/0!	#DIV/0!	#DIV/0!
	#DIV/0!	#DIV/0!	#DIV/0!		#DIV/0!	#DIV/0!	#DIV/0!		#DIV/0!	#DIV/0!	#DIV/0!
	#DIV/0!	#DIV/0!	#DIV/0!		#DIV/0!	#DIV/0!	#DIV/0!		#DIV/0!	#DIV/0!	#DIV/0!
	#DIV/0!	#DIV/0!	#DIV/0!		#DIV/0!	#DIV/0!	#DIV/0!		#DIV/0!	#DIV/0!	#DIV/0!
	#DIV/0!	#DIV/0!	#DIV/0!		#DIV/0!	#DIV/0!	#DIV/0!		#DIV/0!	#DIV/0!	#DIV/0!
	#DIV/0!	#DIV/0!	#DIV/0!		#DIV/0!	#DIV/0!	#DIV/0!		#DIV/0!	#DIV/0!	#DIV/0!
	#DIV/0!	#DIV/0!	#DIV/0!		#DIV/0!	#DIV/0!	#DIV/0!		#DIV/0!	#DIV/0!	#DIV/0!
	#DIV/0!	#DIV/0!	#DIV/0!		#DIV/0!	#DIV/0!	#DIV/0!		#DIV/0!	#DIV/0!	#DIV/0!
	#DIV/0!	#DIV/0!	#DIV/0!		#DIV/0!	#DIV/0!	#DIV/0!		#DIV/0!	#DIV/0!	#DIV/0!
	#DIV/0!	#DIV/0!	#DIV/0!		#DIV/0!	#DIV/0!	#DIV/0!		#DIV/0!	#DIV/0!	#DIV/0!
	#DIV/0!	#DIV/0!	#DIV/0!		#DIV/0!	#DIV/0!	#DIV/0!		#DIV/0!	#DIV/0!	#DIV/0!
	#DIV/0!	#DIV/0!	#DIV/0!		#DIV/0!	#DIV/0!	#DIV/0!		#DIV/0!	#DIV/0!	#DIV/0!
	#DIV/0!	#DIV/0!	#DIV/0!		#DIV/0!	#DIV/0!	#DIV/0!		#DIV/0!	#DIV/0!	#DIV/0!
	#DIV/0!	#DIV/0!	#DIV/0!		#DIV/0!	#DIV/0!	#DIV/0!		#DIV/0!	#DIV/0!	#DIV/0!

## Sheet:  Figure 3A
Inhibition	n=1	n=2	n=3	n=4	n=5	n=6	n=7
pcDNA	0.99	1	1.01	1	0.99	1.11	0.92
hSERINC2 WT	0.84	0.83	0.82	0.82	0.68	0.62	0.52
hSERINC3 WT	1.58	1.42	1.34	1.21	1.81	1.74	1.24
hSERINC5 F397L	4.21	5.21	4.95	4.61	12.92	9.77	5.77
hSERINC5 S328I	12.84	19.05	20.44	19.74	25.68	35.07	15.32
hSERINC5 V396C	73.04	149	176.36	126.27	61.34	42.96	30.11
hSERINC5 WT	701.21	557.35	539.85	1104.83	701.73	710.56	377.41
mTMEM16F DW	2.09101	2.04349	2.59473	3.00649	3.0809	2.63708	2.75928
mTMEM16F DY	2.87598	3.25303	3.4722	4.06728	5.33236	4.62596	3.59286
mTMEM16F GW	36.5039	20.8211	25.5396	23.4323	23.8255	21.5151	22.7564
mTMEM16F GY	80.226	61.4719	47.0199	56.3492	54.1985	58.1967	52.9851

## Sheet: Figure 3C
Inhibition	n=1	n=2	n=3	n=4	n=5	n=6	n=7
pcDNA	0.99	1	1.01	1	0.99	1.11	0.92
S5 WT	701.21	557.35	539.85	1104.83	701.73	710.56	377.41
S5 V396C	73.04	149	176.36	126.27	61.34	42.96	30.11
S5 S328I	12.84	19.05	20.44	19.74	25.68	35.07	15.32
S5 F397L	4.21	5.21	4.95	4.61	12.92	9.77	5.77
TMEM DW	2.09101	2.04349	2.59473	3.00649	3.0809	2.63708	2.75928
TMEM DY	2.87598	3.25303	3.4722	4.06728	5.33236	4.62596	3.59286
TMEM GW	36.5039	20.8211	25.5396	23.4323	23.8255	21.5151	22.7564
TMEM GY	80.226	61.4719	47.0199	56.3492	54.1985	58.1967	52.9851
PS Exposure	n=1	n=2	n=3	mean	SD
pcDNA	1	1	1	1	0
S5 WT	2.12308	1.66578	2.31187	2.03358	0.33221
S5 V396C	1.29942	1.28536	1.40856	1.33111	0.0674398
S5 S328I	1.01814	1.09381	1.1809	1.09761	0.0814427
S5 F397L	0.729444	0.77001	0.742225	0.747226	0.0207404
TMEM DW	0.903442	1.29229	1.31065	1.16879	0.229984
TMEM DY	1.16872	1.81804	1.7347	1.57382	0.353291
TMEM GW	1.26534	1.79104	1.89398	1.65012	0.337179
TMEM GY	1.73746	2.6761	2.58962	2.33439	0.518762

## Sheet: Figure 3E
	pcDNA						hSERINC5 WT						mTMEM16F GY
MLV GG+	1	1	1	1	1		4.30015	4.52475	5.12597	4.02414	4.17297		2.93374	3.10441	3.20621	2.56528	3.08019
MLV GG-	1.22345	1.23581	1.07028	0.97373	1.09925		8.90526	9.42405	10.0078	8.41543	9.84421		3.14766	3.58321	3.53786	2.91863	3.36646
HIV Nef+	1.22951	0.866214	1.30574				1.58907	1.93056	2.30336				1.80996	1.73047	1.737
HIV Nef-	1	1	1				1.98664	2.43239	2.98412				1.96368	1.56275	2.14609

## Sheet: Supplementary Fig. 2H
hSERINC3		hSERINC3 + SiA		hSERINC3 + SiB		hSERINC3 + SiC		hSERINC3 + SiD		hSERINC3 + SiE
Elu. Vt	Abs. 280nM	Elu. Vt	Abs. 280nM	Elu. Vt	Abs. 280nM	Elu. Vt	Abs. 280nM	Elu. Vt	Abs. 280nM	Elu. Vt	Abs. 280nM
0	-88.714	0	-5.906	0	-0.252	0	0.104	0	0.85	0	-0.962
0.039	-0.002	0.039	0.169	0.039	0.111	0.04	-0.068	0.039	0.034	0.039	-0.076
0.078	0.044	0.077	0.376	0.078	0.12	0.08	0.011	0.078	0.115	0.078	-0.119
0.118	1.11	0.116	0.698	0.117	0.18	0.12	0.055	0.117	-0.285	0.117	-0.136
0.157	2.718	0.155	0.86	0.156	0.1	0.16	-0.276	0.156	-0.46	0.155	-0.337
0.196	1.396	0.193	0.654	0.195	-0.128	0.2	-0.475	0.195	-0.563	0.194	-0.412
0.235	0.934	0.232	0.474	0.234	-0.314	0.24	-0.496	0.234	-0.628	0.233	-0.372
0.275	0.765	0.271	0.313	0.273	-0.416	0.28	-0.48	0.273	-0.673	0.272	-0.383
0.314	0.599	0.309	0.172	0.312	-0.384	0.32	-0.51	0.312	-0.709	0.311	-0.413
0.353	0.422	0.348	0.065	0.351	-0.376	0.36	-0.53	0.351	-0.739	0.35	-0.44
0.392	0.264	0.387	0.102	0.39	-0.398	0.4	-0.563	0.39	-0.769	0.389	-0.449
0.432	0.09	0.425	0.122	0.429	-0.422	0.44	-0.577	0.43	-0.78	0.427	-0.461
0.471	-0.025	0.464	0.1	0.468	-0.436	0.48	-0.604	0.469	-0.799	0.466	-0.481
0.51	-0.019	0.503	0.075	0.507	-0.442	0.519	-0.604	0.508	-0.806	0.505	-0.497
0.549	-0.05	0.541	0.058	0.546	-0.464	0.559	-0.615	0.547	-0.825	0.544	-0.504
0.589	-0.108	0.58	0.04	0.585	-0.47	0.599	-0.629	0.586	-0.825	0.583	-0.52
0.628	-0.173	0.619	0.03	0.624	-0.473	0.639	-0.641	0.625	-0.804	0.622	-0.519
0.667	-0.234	0.657	0.018	0.663	-0.48	0.679	-0.639	0.664	-0.641	0.66	-0.518
0.706	-0.286	0.696	0.008	0.702	-0.474	0.719	-0.636	0.703	-0.425	0.699	-0.451
0.745	-0.337	0.735	0	0.741	-0.475	0.759	-0.468	0.742	-0.305	0.738	-0.231
0.785	-0.396	0.773	0.004	0.78	-0.491	0.799	-0.215	0.781	-0.323	0.777	-0.038
0.824	-0.447	0.812	0.001	0.819	-0.448	0.839	-0.054	0.82	-0.432	0.816	0.017
0.863	-0.488	0.851	-0.006	0.858	-0.242	0.879	-0.059	0.859	-0.566	0.855	-0.035
0.902	-0.547	0.889	0.036	0.897	0.026	0.919	-0.158	0.898	-0.703	0.894	-0.136
0.942	-0.592	0.928	0.258	0.935	0.162	0.959	-0.284	0.937	-0.832	0.932	-0.272
0.981	-0.593	0.967	0.474	0.974	0.129	0.999	-0.448	0.976	-0.899	0.971	-0.416
1.02	-0.431	1.005	0.576	1.013	0.024	1.039	-0.586	1.015	-0.84	1.01	-0.532
1.059	-0.272	1.044	0.529	1.052	-0.122	1.079	-0.671	1.054	-0.833	1.049	-0.537
1.099	-0.209	1.083	0.417	1.091	-0.275	1.119	-0.614	1.093	-0.85	1.088	-0.487
1.138	-0.223	1.121	0.289	1.13	-0.422	1.159	-0.612	1.132	-0.881	1.127	-0.499
1.177	-0.515	1.16	0.148	1.169	-0.519	1.199	-0.625	1.171	-0.893	1.166	-0.521
1.216	-0.553	1.198	0.018	1.208	-0.463	1.239	-0.641	1.21	-0.905	1.204	-0.529
1.256	-0.593	1.237	-0.046	1.247	-0.446	1.279	-0.664	1.249	-0.913	1.243	-0.542
1.295	-0.737	1.276	0.015	1.286	-0.453	1.319	-0.673	1.289	-0.919	1.282	-0.559
1.334	-0.888	1.314	0.026	1.325	-0.48	1.359	-0.677	1.328	-0.923	1.321	-0.566
1.373	-1.004	1.353	-0.002	1.364	-0.494	1.399	-0.686	1.367	-0.939	1.36	-0.572
1.413	-1.061	1.392	-0.016	1.403	-0.504	1.439	-0.687	1.406	-0.936	1.399	-0.57
1.452	-1.058	1.43	-0.034	1.442	-0.516	1.479	-0.693	1.445	-0.94	1.437	-0.576
1.491	-1.074	1.469	-0.045	1.481	-0.518	1.518	-0.704	1.484	-0.944	1.476	-0.588
1.53	-1.109	1.508	-0.054	1.52	-0.514	1.558	-0.692	1.523	-0.934	1.515	-0.57
1.569	-1.144	1.546	-0.059	1.559	-0.367	1.598	-0.65	1.562	-0.867	1.554	-0.49
1.609	-1.187	1.585	-0.073	1.598	-0.253	1.638	-0.446	1.601	-0.71	1.593	-0.258
1.648	-1.231	1.624	-0.067	1.637	-0.091	1.678	-0.164	1.64	-0.531	1.632	-0.049
1.687	-1.269	1.662	-0.076	1.676	-0.085	1.718	-0.032	1.679	-0.398	1.671	0.024
1.726	-1.312	1.701	-0.067	1.715	-0.008	1.758	-0.061	1.718	-0.331	1.709	-0.028
1.766	-1.336	1.74	-0.048	1.754	0.117	1.798	-0.179	1.757	-0.357	1.748	-0.144
1.805	-1.361	1.778	0.132	1.793	0.212	1.838	-0.322	1.796	-0.425	1.787	-0.283
1.844	-1.395	1.817	0.389	1.832	0.257	1.878	-0.479	1.835	-0.506	1.826	-0.385
1.883	-1.421	1.856	0.528	1.871	0.238	1.918	-0.635	1.874	-0.61	1.865	-0.475
1.923	-1.448	1.894	0.536	1.91	0.171	1.958	-0.703	1.913	-0.727	1.904	-0.562
1.962	-1.478	1.933	0.449	1.949	0.1	1.998	-0.642	1.952	-0.834	1.943	-0.584
2.001	-1.5	1.972	0.323	1.988	0.004	2.038	-0.65	1.991	-0.944	1.981	-0.534
2.04	-1.527	2.01	0.235	2.027	-0.095	2.078	-0.658	2.03	-1.003	2.02	-0.522
2.08	-1.544	2.049	-0.067	2.066	-0.189	2.118	-0.674	2.069	-0.972	2.059	-0.525
2.119	-1.56	2.088	-0.059	2.105	-0.284	2.158	-0.702	2.109	-0.94	2.098	-0.534
2.158	-1.573	2.126	0.022	2.144	-0.38	2.198	-0.699	2.148	-0.946	2.137	-0.546
2.197	-1.579	2.165	0.035	2.183	-0.462	2.238	-0.709	2.187	-0.959	2.176	-0.555
2.236	-1.517	2.204	0.005	2.222	-0.465	2.278	-0.711	2.226	-0.971	2.214	-0.561
2.276	-1.382	2.242	-0.023	2.261	-0.422	2.318	-0.718	2.265	-0.986	2.253	-0.57
2.315	-1.25	2.281	-0.049	2.3	-0.409	2.358	-0.72	2.304	-0.994	2.292	-0.582
2.354	-1.151	2.32	-0.065	2.339	-0.408	2.398	-0.723	2.343	-1.012	2.331	-0.587
2.393	-1.104	2.358	-0.069	2.378	-0.42	2.438	-0.712	2.382	-1.019	2.37	-0.581
2.433	-1.104	2.397	-0.081	2.417	-0.436	2.478	-0.54	2.421	-1.025	2.409	-0.59
2.472	-1.154	2.436	-0.088	2.456	-0.448	2.517	-0.257	2.46	-1.029	2.448	-0.592
2.511	-1.238	2.474	-0.099	2.495	-0.454	2.557	-0.05	2.499	-1.04	2.486	-0.59
2.55	-1.337	2.513	-0.108	2.534	-0.46	2.597	-0.022	2.538	-1.044	2.525	-0.594
2.59	-1.429	2.552	-0.117	2.573	-0.47	2.637	-0.11	2.577	-1.051	2.564	-0.594
2.629	-1.52	2.59	-0.12	2.612	-0.478	2.677	-0.252	2.616	-1.055	2.603	-0.586
2.668	-1.61	2.629	-0.122	2.651	-0.482	2.717	-0.421	2.655	-1.057	2.642	-0.566
2.707	-1.694	2.668	-0.126	2.69	-0.487	2.757	-0.589	2.694	-1.063	2.681	-0.444
2.747	-1.768	2.706	-0.129	2.728	-0.497	2.797	-0.717	2.733	-1.043	2.72	-0.247
2.786	-1.78	2.745	-0.135	2.767	-0.501	2.837	-0.687	2.772	-0.914	2.758	-0.076
2.825	-1.741	2.784	-0.137	2.806	-0.494	2.877	-0.661	2.811	-0.718	2.797	0.024
2.864	-1.731	2.822	-0.134	2.845	-0.497	2.917	-0.666	2.85	-0.532	2.836	0.064
2.903	-1.736	2.861	-0.114	2.884	-0.503	2.957	-0.684	2.889	-0.427	2.875	0.031
2.943	-1.739	2.9	-0.02	2.923	-0.502	2.997	-0.701	2.928	-0.403	2.914	-0.039
2.982	-1.756	2.938	0.145	2.962	-0.505	3.037	-0.702	2.968	-0.44	2.953	-0.133
3.021	-1.767	2.977	0.324	3.001	-0.505	3.077	-0.716	3.007	-0.523	2.991	-0.232
3.06	-1.766	3.016	0.459	3.04	-0.464	3.117	-0.716	3.046	-0.62	3.03	-0.333
3.1	-1.778	3.054	0.526	3.079	-0.328	3.157	-0.716	3.085	-0.743	3.069	-0.442
3.139	-1.795	3.093	0.534	3.118	-0.149	3.197	-0.717	3.124	-0.851	3.108	-0.54
3.178	-1.797	3.132	0.498	3.157	0.02	3.237	-0.718	3.163	-0.968	3.147	-0.582
3.217	-1.809	3.17	0.423	3.196	0.135	3.277	-0.705	3.202	-1.08	3.186	-0.535
3.257	-1.814	3.209	0.337	3.235	0.189	3.317	-0.612	3.241	-1.118	3.225	-0.502
3.296	-1.82	3.248	0.247	3.274	0.187	3.357	-0.326	3.28	-1.076	3.263	-0.508
3.335	-1.821	3.286	0.139	3.313	0.13	3.397	-0.073	3.319	-1.05	3.302	-0.518
3.374	-1.828	3.325	0.036	3.352	0.041	3.437	0.011	3.358	-1.06	3.341	-0.534
3.414	-1.834	3.364	-0.056	3.391	-0.041	3.476	-0.04	3.397	-1.078	3.38	-0.539
3.453	-1.838	3.402	-0.139	3.43	-0.135	3.516	-0.176	3.436	-1.088	3.419	-0.537
3.492	-1.838	3.441	-0.179	3.469	-0.239	3.556	-0.333	3.475	-1.108	3.458	-0.544
3.531	-1.84	3.479	-0.152	3.508	-0.334	3.596	-0.504	3.514	-1.112	3.497	-0.55
3.571	-1.798	3.518	-0.116	3.547	-0.434	3.636	-0.661	3.553	-1.12	3.535	-0.552
3.61	-1.69	3.557	-0.11	3.586	-0.517	3.676	-0.685	3.592	-1.132	3.574	-0.561
3.649	-1.527	3.595	-0.114	3.625	-0.516	3.716	-0.636	3.631	-1.132	3.613	-0.559
3.688	-1.364	3.634	-0.132	3.664	-0.483	3.756	-0.636	3.67	-1.141	3.652	-0.548
3.727	-1.259	3.673	-0.153	3.703	-0.463	3.796	-0.648	3.709	-1.141	3.691	-0.551
3.767	-1.191	3.711	-0.163	3.742	-0.467	3.836	-0.657	3.748	-1.145	3.73	-0.547
3.806	-1.196	3.75	-0.173	3.781	-0.472	3.876	-0.672	3.788	-1.143	3.768	-0.546
3.845	-1.24	3.789	-0.176	3.82	-0.48	3.916	-0.683	3.827	-1.147	3.807	-0.54
3.884	-1.31	3.827	-0.181	3.859	-0.498	3.956	-0.688	3.866	-1.148	3.846	-0.518
3.924	-1.402	3.866	-0.187	3.898	-0.512	3.996	-0.689	3.905	-1.139	3.885	-0.389
3.963	-1.489	3.905	-0.198	3.937	-0.514	4.036	-0.687	3.944	-1.057	3.924	-0.173
4.002	-1.581	3.943	-0.198	3.976	-0.521	4.076	-0.688	3.983	-0.872	3.963	0.012
4.041	-1.673	3.982	-0.205	4.015	-0.522	4.116	-0.689	4.022	-0.665	4.002	0.142
4.081	-1.768	4.021	-0.211	4.054	-0.529	4.156	-0.66	4.061	-0.516	4.04	0.178
4.12	-1.84	4.059	-0.217	4.093	-0.53	4.196	-0.491	4.1	-0.432	4.079	0.148
4.159	-1.845	4.098	-0.223	4.132	-0.534	4.236	-0.21	4.139	-0.439	4.118	0.071
4.198	-1.804	4.137	-0.215	4.171	-0.536	4.276	-0.034	4.178	-0.508	4.157	-0.023
4.238	-1.793	4.175	-0.212	4.21	-0.537	4.316	-0.03	4.217	-0.603	4.196	-0.127
4.277	-1.793	4.214	-0.185	4.249	-0.544	4.356	-0.113	4.256	-0.71	4.235	-0.234
4.316	-1.801	4.253	-0.083	4.288	-0.549	4.396	-0.272	4.295	-0.829	4.274	-0.34
4.355	-1.819	4.291	0.091	4.327	-0.547	4.436	-0.431	4.334	-0.94	4.312	-0.438
4.394	-1.841	4.33	0.272	4.366	-0.548	4.475	-0.578	4.373	-1.055	4.351	-0.5
4.434	-1.849	4.369	0.412	4.405	-0.546	4.515	-0.684	4.412	-1.142	4.39	-0.458
4.473	-1.85	4.407	0.49	4.444	-0.488	4.555	-0.639	4.451	-1.14	4.429	-0.419
4.512	-1.856	4.446	0.506	4.483	-0.336	4.595	-0.622	4.49	-1.092	4.468	-0.411
4.551	-1.86	4.485	0.475	4.522	-0.136	4.635	-0.635	4.529	-1.083	4.507	-0.425
4.591	-1.866	4.523	0.4	4.56	0.036	4.675	-0.65	4.568	-1.095	4.546	-0.441
4.63	-1.867	4.562	0.31	4.599	0.149	4.715	-0.659	4.608	-1.104	4.584	-0.447
4.669	-1.874	4.601	0.22	4.638	0.202	4.755	-0.676	4.647	-1.112	4.623	-0.45
4.708	-1.879	4.639	0.117	4.677	0.184	4.795	-0.686	4.686	-1.124	4.662	-0.45
4.748	-1.881	4.678	0.015	4.716	0.124	4.835	-0.692	4.725	-1.136	4.701	-0.458
4.787	-1.878	4.717	-0.094	4.755	0.044	4.875	-0.706	4.764	-1.137	4.74	-0.465
4.826	-1.88	4.755	-0.194	4.794	-0.05	4.915	-0.711	4.803	-1.14	4.779	-0.468
4.865	-1.885	4.794	-0.245	4.833	-0.154	4.955	-0.714	4.842	-1.144	4.817	-0.461
4.905	-1.875	4.833	-0.214	4.872	-0.253	4.995	-0.707	4.881	-1.147	4.856	-0.466
4.944	-1.848	4.871	-0.171	4.911	-0.355	5.035	-0.64	4.92	-1.145	4.895	-0.463
4.983	-1.738	4.91	-0.163	4.95	-0.453	5.075	-0.384	4.959	-1.148	4.934	-0.459
5.022	-1.558	4.949	-0.169	4.989	-0.531	5.115	-0.146	4.998	-1.15	4.973	-0.457
5.061	-1.384	4.987	-0.18	5.028	-0.543	5.155	-0.074	5.037	-1.154	5.012	-0.455
5.101	-1.248	5.026	-0.193	5.067	-0.5	5.195	-0.125	5.076	-1.14	5.051	-0.425
5.14	-1.174	5.065	-0.195	5.106	-0.477	5.235	-0.253	5.115	-1.124	5.089	-0.29
5.179	-1.166	5.103	-0.21	5.145	-0.477	5.275	-0.396	5.154	-1.014	5.128	-0.086
5.218	-1.197	5.142	-0.22	5.184	-0.492	5.315	-0.544	5.193	-0.824	5.167	0.116
5.258	-1.272	5.181	-0.224	5.223	-0.508	5.355	-0.689	5.232	-0.623	5.206	0.251
5.297	-1.355	5.219	-0.22	5.262	-0.513	5.395	-0.703	5.271	-0.497	5.245	0.287
5.336	-1.449	5.258	-0.219	5.301	-0.513	5.435	-0.651	5.31	-0.454	5.284	0.281
5.375	-1.542	5.297	-0.227	5.34	-0.521	5.474	-0.658	5.349	-0.486	5.323	0.214
5.415	-1.631	5.335	-0.226	5.379	-0.525	5.514	-0.682	5.388	-0.565	5.361	0.109
5.454	-1.733	5.374	-0.226	5.418	-0.524	5.554	-0.691	5.427	-0.65	5.4	-0.009
5.493	-1.812	5.413	-0.227	5.457	-0.527	5.594	-0.702	5.467	-0.758	5.439	-0.116
5.532	-1.826	5.451	-0.226	5.496	-0.523	5.634	-0.694	5.506	-0.883	5.478	-0.231
5.572	-1.787	5.49	-0.234	5.535	-0.524	5.674	-0.711	5.545	-0.978	5.517	-0.352
5.611	-1.764	5.529	-0.23	5.574	-0.535	5.714	-0.709	5.584	-1.087	5.556	-0.422
5.65	-1.761	5.567	-0.221	5.613	-0.545	5.754	-0.71	5.623	-1.129	5.594	-0.4
5.689	-1.76	5.606	-0.178	5.652	-0.543	5.794	-0.712	5.662	-1.091	5.633	-0.36
5.729	-1.763	5.645	-0.053	5.691	-0.537	5.834	-0.707	5.701	-1.058	5.672	-0.346
5.768	-1.776	5.683	0.134	5.73	-0.533	5.874	-0.676	5.74	-1.061	5.711	-0.351
5.807	-1.776	5.722	0.307	5.769	-0.534	5.914	-0.46	5.779	-1.073	5.75	-0.363
5.846	-1.781	5.76	0.435	5.808	-0.466	5.954	-0.189	5.818	-1.072	5.789	-0.375
5.885	-1.79	5.799	0.497	5.847	-0.314	5.994	-0.024	5.857	-1.085	5.828	-0.387
5.925	-1.797	5.838	0.504	5.886	-0.128	6.034	-0.006	5.896	-1.094	5.866	-0.41
5.964	-1.797	5.876	0.456	5.925	0.037	6.074	-0.104	5.935	-1.092	5.905	-0.4
6.003	-1.797	5.915	0.385	5.964	0.154	6.114	-0.235	5.974	-1.091	5.944	-0.407
6.042	-1.794	5.954	0.298	6.003	0.199	6.154	-0.376	6.013	-1.095	5.983	-0.408
6.082	-1.791	5.992	0.189	6.042	0.194	6.194	-0.492	6.052	-1.101	6.022	-0.413
6.121	-1.793	6.031	0.084	6.081	0.143	6.234	-0.539	6.091	-1.093	6.061	-0.405
6.16	-1.79	6.07	-0.014	6.12	0.062	6.274	-0.437	6.13	-1.088	6.1	-0.415
6.199	-1.79	6.108	-0.116	6.159	-0.026	6.314	-0.325	6.169	-1.09	6.138	-0.411
6.239	-1.785	6.147	-0.194	6.198	-0.133	6.354	-0.226	6.208	-1.09	6.177	-0.418
6.278	-1.765	6.186	-0.229	6.237	-0.239	6.394	-0.1	6.247	-1.076	6.216	-0.414
6.317	-1.694	6.224	-0.191	6.276	-0.327	6.434	0.067	6.287	-1.063	6.255	-0.385
6.356	-1.535	6.263	-0.159	6.315	-0.422	6.473	0.276	6.326	-1.014	6.294	-0.279
6.396	-1.339	6.302	-0.153	6.354	-0.496	6.513	0.488	6.365	-0.87	6.333	-0.073
6.435	-1.182	6.34	-0.167	6.392	-0.487	6.553	0.725	6.404	-0.663	6.371	0.126
6.474	-1.078	6.379	-0.169	6.431	-0.439	6.593	0.961	6.443	-0.465	6.41	0.28
6.513	-1.03	6.418	-0.168	6.47	-0.399	6.633	1.2	6.482	-0.32	6.449	0.351
6.552	-1.051	6.456	-0.177	6.509	-0.382	6.673	1.439	6.521	-0.252	6.488	0.343
6.592	-1.102	6.495	-0.177	6.548	-0.374	6.713	1.688	6.56	-0.25	6.527	0.292
6.631	-1.181	6.534	-0.168	6.587	-0.352	6.753	2.119	6.599	-0.271	6.566	0.224
6.67	-1.27	6.572	-0.158	6.626	-0.328	6.793	2.65	6.638	-0.316	6.605	0.139
6.709	-1.364	6.611	-0.157	6.665	-0.307	6.833	3.097	6.677	-0.388	6.643	0.06
6.749	-1.463	6.65	-0.142	6.704	-0.278	6.873	3.407	6.716	-0.451	6.682	-0.026
6.788	-1.559	6.688	-0.132	6.743	-0.249	6.913	3.634	6.755	-0.514	6.721	-0.116
6.827	-1.646	6.727	-0.116	6.782	-0.236	6.953	3.856	6.794	-0.57	6.76	-0.166
6.866	-1.709	6.766	-0.107	6.821	-0.23	6.993	4.136	6.833	-0.558	6.799	-0.128
6.906	-1.7	6.804	-0.093	6.86	-0.219	7.033	4.478	6.872	-0.471	6.838	-0.078
6.945	-1.665	6.843	-0.088	6.899	-0.208	7.073	4.95	6.911	-0.418	6.877	-0.066
6.984	-1.653	6.882	-0.081	6.938	-0.192	7.113	5.681	6.95	-0.396	6.915	-0.062
7.023	-1.664	6.92	-0.063	6.977	-0.178	7.153	6.492	6.989	-0.367	6.954	-0.065
7.063	-1.681	6.959	-0.037	7.016	-0.161	7.193	7.372	7.028	-0.343	6.993	-0.049
7.102	-1.69	6.998	0.062	7.055	-0.143	7.233	8.36	7.067	-0.315	7.032	-0.035
7.141	-1.696	7.036	0.239	7.094	-0.114	7.273	9.352	7.106	-0.277	7.071	-0.009
7.18	-1.695	7.075	0.422	7.133	-0.065	7.313	10.376	7.146	-0.222	7.11	0.025
7.219	-1.695	7.114	0.57	7.172	-0.003	7.353	11.255	7.185	-0.154	7.148	0.068
7.259	-1.69	7.152	0.659	7.211	0.12	7.393	11.968	7.224	-0.079	7.187	0.111
7.298	-1.675	7.191	0.712	7.25	0.349	7.433	12.376	7.263	0.011	7.226	0.185
7.337	-1.649	7.23	0.695	7.289	0.623	7.472	12.478	7.302	0.132	7.265	0.252
7.376	-1.608	7.268	0.667	7.328	0.904	7.512	12.264	7.341	0.268	7.304	0.351
7.416	-1.563	7.307	0.651	7.367	1.165	7.552	11.788	7.38	0.417	7.343	0.464
7.455	-1.506	7.346	0.647	7.406	1.367	7.592	11.284	7.419	0.581	7.382	0.599
7.494	-1.449	7.384	0.661	7.445	1.525	7.632	10.817	7.458	0.743	7.42	0.751
7.533	-1.39	7.423	0.71	7.484	1.645	7.672	10.262	7.497	0.901	7.459	0.927
7.573	-1.345	7.462	0.785	7.523	1.734	7.712	9.586	7.536	1.094	7.498	1.184
7.612	-1.3	7.5	0.895	7.562	1.79	7.752	8.871	7.575	1.349	7.537	1.496
7.651	-1.262	7.539	1.065	7.601	1.813	7.792	8.19	7.614	1.631	7.576	1.79
7.69	-1.215	7.578	1.298	7.64	1.813	7.832	7.556	7.653	1.829	7.615	2.009
7.73	-1.088	7.616	1.517	7.679	1.803	7.872	7.029	7.692	1.957	7.654	2.152
7.769	-0.898	7.655	1.689	7.718	1.798	7.912	6.601	7.731	2.007	7.692	2.197
7.808	-0.704	7.694	1.845	7.757	1.81	7.952	6.4	7.77	2.024	7.731	2.206
7.847	-0.545	7.732	1.978	7.796	1.913	7.992	6.256	7.809	2.013	7.77	2.193
7.887	-0.442	7.771	2.114	7.835	2.063	8.032	6.117	7.848	2.014	7.809	2.178
7.926	-0.398	7.81	2.245	7.874	2.185	8.072	6.035	7.887	2.024	7.848	2.182
7.965	-0.404	7.848	2.391	7.913	2.301	8.112	5.991	7.926	2.048	7.887	2.195
8.004	-0.437	7.887	2.54	7.952	2.424	8.152	5.974	7.966	2.102	7.925	2.219
8.043	-0.466	7.926	2.709	7.991	2.557	8.192	5.985	8.005	2.179	7.964	2.301
8.083	-0.508	7.964	2.888	8.03	2.712	8.232	6.045	8.044	2.354	8.003	2.49
8.122	-0.539	8.003	3.071	8.069	2.869	8.272	6.128	8.083	2.59	8.042	2.683
8.161	-0.566	8.041	3.264	8.108	3.031	8.312	6.228	8.122	2.798	8.081	2.847
8.2	-0.592	8.08	3.473	8.147	3.21	8.352	6.364	8.161	2.996	8.12	3.03
8.24	-0.599	8.119	3.695	8.185	3.393	8.392	6.514	8.2	3.199	8.159	3.22
8.279	-0.543	8.157	3.926	8.224	3.589	8.431	6.741	8.239	3.435	8.197	3.427
8.318	-0.422	8.196	4.168	8.263	3.792	8.471	7.145	8.278	3.672	8.236	3.63
8.357	-0.304	8.235	4.413	8.302	3.998	8.511	7.602	8.317	3.916	8.275	3.857
8.397	-0.219	8.273	4.674	8.341	4.228	8.551	7.94	8.356	4.173	8.314	4.1
8.436	-0.139	8.312	4.939	8.38	4.457	8.591	8.138	8.395	4.452	8.353	4.351
8.475	-0.058	8.351	5.244	8.419	4.693	8.631	8.262	8.434	4.736	8.392	4.616
8.514	0.038	8.389	5.638	8.458	4.95	8.671	8.378	8.473	5.025	8.431	4.881
8.554	0.134	8.428	6.096	8.497	5.213	8.711	8.492	8.512	5.342	8.469	5.171
8.593	0.237	8.467	6.582	8.536	5.478	8.751	8.616	8.551	5.658	8.508	5.464
8.632	0.34	8.505	7.031	8.575	5.759	8.791	8.839	8.59	6.005	8.547	5.797
8.671	0.453	8.544	7.443	8.614	6.113	8.831	9.188	8.629	6.347	8.586	6.116
8.71	0.573	8.583	7.803	8.653	6.558	8.871	9.505	8.668	6.709	8.625	6.459
8.75	0.696	8.621	8.125	8.692	7.029	8.911	9.815	8.707	7.124	8.664	6.81
8.789	0.823	8.66	8.426	8.731	7.478	8.951	10.143	8.746	7.654	8.702	7.236
8.828	0.968	8.699	8.73	8.77	7.89	8.991	10.5	8.785	8.256	8.741	7.783
8.867	1.099	8.737	9.035	8.809	8.254	9.031	10.87	8.825	8.839	8.78	8.379
8.907	1.246	8.776	9.357	8.848	8.575	9.071	11.269	8.864	9.379	8.819	8.948
8.946	1.391	8.815	9.694	8.887	8.872	9.111	11.697	8.903	9.858	8.858	9.461
8.985	1.551	8.853	10.046	8.926	9.178	9.151	12.145	8.942	10.326	8.897	9.954
9.024	1.714	8.892	10.431	8.965	9.505	9.191	12.618	8.981	10.77	8.936	10.388
9.064	1.885	8.931	10.898	9.004	9.85	9.231	13.1	9.02	11.219	8.974	10.838
9.103	2.112	8.969	11.459	9.043	10.224	9.271	13.583	9.059	11.675	9.013	11.306
9.142	2.423	9.008	12.04	9.082	10.63	9.311	14.13	9.098	12.165	9.052	11.803
9.181	2.77	9.047	12.638	9.121	11.059	9.351	14.854	9.137	12.678	9.091	12.318
9.221	3.088	9.085	13.24	9.16	11.552	9.391	15.565	9.176	13.221	9.13	12.864
9.26	3.357	9.124	13.884	9.199	12.12	9.43	16.115	9.215	13.871	9.169	13.449
9.299	3.601	9.163	14.55	9.238	12.709	9.47	16.484	9.254	14.564	9.208	14.125
9.338	3.786	9.201	15.24	9.277	13.277	9.51	16.753	9.293	15.25	9.246	14.886
9.378	3.948	9.24	15.957	9.316	13.836	9.55	16.969	9.332	15.88	9.285	15.572
9.417	4.105	9.279	16.673	9.355	14.381	9.59	17.125	9.371	16.482	9.324	16.253
9.456	4.246	9.317	17.392	9.394	14.918	9.63	17.264	9.41	17.046	9.363	16.891
9.495	4.393	9.356	18.106	9.433	15.441	9.67	17.464	9.449	17.576	9.402	17.491
9.534	4.561	9.395	18.79	9.472	15.935	9.71	17.727	9.488	18.063	9.441	18.047
9.574	4.745	9.433	19.451	9.511	16.398	9.75	17.911	9.527	18.515	9.48	18.552
9.613	4.932	9.472	20.075	9.55	16.826	9.79	18.084	9.566	18.917	9.518	19.01
9.652	5.179	9.511	20.665	9.589	17.217	9.83	18.272	9.605	19.254	9.557	19.422
9.691	5.517	9.549	21.203	9.628	17.58	9.87	18.482	9.645	19.568	9.596	19.792
9.731	5.864	9.588	21.687	9.667	17.915	9.91	18.764	9.684	19.841	9.635	20.109
9.77	6.189	9.627	22.12	9.706	18.233	9.95	19.083	9.723	20.094	9.674	20.405
9.809	6.509	9.665	22.505	9.745	18.548	9.99	19.496	9.762	20.346	9.713	20.671
9.848	6.821	9.704	22.857	9.784	18.867	10.03	20.009	9.801	20.623	9.751	20.946
9.888	7.14	9.743	23.198	9.823	19.204	10.07	20.619	9.84	20.933	9.79	21.259
9.927	7.458	9.781	23.594	9.862	19.588	10.11	21.356	9.879	21.297	9.829	21.61
9.966	7.766	9.82	24.067	9.901	20.011	10.15	22.192	9.918	21.816	9.868	22.044
10.005	8.067	9.859	24.598	9.94	20.522	10.19	23.226	9.957	22.513	9.907	22.649
10.045	8.351	9.897	25.137	9.979	21.138	10.23	24.515	9.996	23.4	9.946	23.504
10.084	8.616	9.936	25.685	10.017	21.936	10.27	25.868	10.035	24.362	9.985	24.502
10.123	8.861	9.975	26.27	10.056	22.909	10.31	27.101	10.074	25.405	10.023	25.657
10.162	9.095	10.013	26.927	10.095	23.993	10.35	28.213	10.113	26.511	10.062	26.892
10.201	9.308	10.052	27.689	10.134	25.166	10.39	29.227	10.152	27.69	10.101	28.219
10.241	9.522	10.091	28.587	10.173	26.384	10.429	30.122	10.191	28.94	10.14	29.677
10.28	9.717	10.129	29.614	10.212	27.641	10.469	30.919	10.23	30.284	10.179	31.26
10.319	9.895	10.168	30.805	10.251	28.926	10.509	31.562	10.269	31.792	10.218	32.957
10.358	10.069	10.207	32.151	10.29	30.241	10.549	32.127	10.308	33.255	10.257	34.775
10.398	10.261	10.245	33.648	10.329	31.577	10.589	32.523	10.347	34.748	10.295	36.707
10.437	10.467	10.284	35.288	10.368	32.852	10.629	32.625	10.386	36.192	10.334	38.591
10.476	10.724	10.322	37.028	10.407	34.082	10.669	32.445	10.425	37.609	10.373	40.483
10.515	11.094	10.361	38.884	10.446	35.215	10.709	31.993	10.465	38.949	10.412	42.317
10.555	11.55	10.4	40.76	10.485	36.189	10.749	31.282	10.504	40.089	10.451	44
10.594	12.028	10.438	42.558	10.524	37.009	10.789	30.316	10.543	40.99	10.49	45.435
10.633	12.526	10.477	44.223	10.563	37.667	10.829	29.127	10.582	41.6	10.528	46.565
10.672	13.003	10.516	45.736	10.602	38.128	10.869	27.739	10.621	41.929	10.567	47.36
10.712	13.484	10.554	47.057	10.641	38.299	10.909	26.192	10.66	41.913	10.606	47.794
10.751	13.975	10.593	48.106	10.68	38.173	10.949	24.535	10.699	41.567	10.645	47.819
10.79	14.483	10.632	48.848	10.719	37.762	10.989	22.81	10.738	40.884	10.684	47.438
10.829	15.01	10.67	49.26	10.758	37.042	11.029	21.041	10.777	39.892	10.723	46.622
10.868	15.548	10.709	49.308	10.797	36.054	11.069	19.431	10.816	38.594	10.762	45.437
10.908	16.105	10.748	48.966	10.836	34.817	11.109	18.01	10.855	37.03	10.8	43.891
10.947	16.642	10.786	48.247	10.875	33.362	11.149	16.543	10.894	35.201	10.839	42.022
10.986	17.138	10.825	47.17	10.914	31.704	11.189	15.017	10.933	33.246	10.878	39.889
11.025	17.608	10.864	45.772	10.953	29.889	11.229	13.474	10.972	31.024	10.917	37.539
11.065	18.072	10.902	44.041	10.992	27.96	11.269	11.988	11.011	28.797	10.956	35.01
11.104	18.466	10.941	42.04	11.031	25.946	11.309	10.597	11.05	26.502	10.995	32.313
11.143	18.718	10.98	39.816	11.07	23.921	11.349	9.372	11.089	24.254	11.034	29.667
11.182	18.829	11.018	37.394	11.109	21.878	11.389	8.278	11.128	22.041	11.072	26.926
11.222	18.805	11.057	34.843	11.148	19.86	11.428	7.449	11.167	19.995	11.111	24.389
11.261	18.626	11.096	32.223	11.187	17.867	11.468	6.785	11.206	18.088	11.15	22.038
11.3	18.29	11.134	29.569	11.226	15.999	11.508	6.168	11.245	16.2	11.189	19.84
11.339	17.81	11.173	27.046	11.265	14.235	11.548	5.634	11.284	14.471	11.228	17.742
11.379	17.178	11.212	24.665	11.304	12.588	11.588	5.198	11.324	12.709	11.267	15.753
11.418	16.407	11.25	22.384	11.343	11.077	11.628	4.827	11.363	11.11	11.305	13.842
11.457	15.519	11.289	20.206	11.382	9.726	11.668	4.533	11.402	9.611	11.344	11.999
11.496	14.53	11.328	18.135	11.421	8.601	11.708	4.301	11.441	8.255	11.383	10.362
11.536	13.449	11.366	16.149	11.46	7.67	11.748	4.096	11.48	7.027	11.422	8.822
11.575	12.302	11.405	14.274	11.499	6.842	11.788	3.929	11.519	5.926	11.461	7.51
11.614	11.097	11.444	12.549	11.538	6.084	11.828	3.791	11.558	4.97	11.5	6.343
11.653	9.884	11.482	10.949	11.577	5.377	11.868	3.683	11.597	4.102	11.539	5.316
11.692	8.67	11.521	9.514	11.616	4.709	11.908	3.692	11.636	3.447	11.577	4.433
11.732	7.476	11.56	8.225	11.655	4.089	11.948	3.882	11.675	2.935	11.616	3.752
11.771	6.313	11.598	7.086	11.694	3.52	11.988	4.069	11.714	2.492	11.655	3.231
11.81	5.208	11.637	6.089	11.733	3.013	12.028	4.093	11.753	2.091	11.694	2.755
11.849	4.192	11.676	5.217	11.772	2.551	12.068	3.973	11.792	1.751	11.733	2.349
11.889	3.301	11.714	4.491	11.811	2.146	12.108	3.801	11.831	1.465	11.772	1.996
11.928	2.548	11.753	3.926	11.849	1.792	12.148	3.602	11.87	1.223	11.811	1.708
11.967	1.89	11.792	3.482	11.888	1.481	12.188	3.398	11.909	1.022	11.849	1.477
12.006	1.265	11.83	3.092	11.927	1.216	12.228	3.22	11.948	0.844	11.888	1.277
12.046	0.673	11.869	2.744	11.966	1.049	12.268	3.167	11.987	0.704	11.927	1.11
12.085	0.1	11.908	2.442	12.005	0.968	12.308	3.195	12.026	0.579	11.966	0.979
12.124	-0.458	11.946	2.191	12.044	0.892	12.348	3.184	12.065	0.478	12.005	0.878
12.163	-0.974	11.985	1.979	12.083	0.809	12.388	3.156	12.104	0.405	12.044	0.779
12.203	-1.438	12.024	1.801	12.122	0.737	12.427	3.132	12.144	0.331	12.082	0.7
12.242	-1.852	12.062	1.647	12.161	0.666	12.467	3.11	12.183	0.264	12.121	0.628
12.281	-2.234	12.101	1.519	12.2	0.604	12.507	3.113	12.222	0.217	12.16	0.569
12.32	-2.562	12.14	1.412	12.239	0.547	12.547	3.098	12.261	0.173	12.199	0.53
12.359	-2.851	12.178	1.313	12.278	0.515	12.587	3.098	12.3	0.139	12.238	0.486
12.399	-3.097	12.217	1.239	12.317	0.48	12.627	3.094	12.339	0.148	12.277	0.459
12.438	-3.262	12.256	1.167	12.356	0.459	12.667	3.095	12.378	0.263	12.316	0.52
12.477	-3.34	12.294	1.105	12.395	0.43	12.707	3.103	12.417	0.437	12.354	0.682
12.516	-3.408	12.333	1.061	12.434	0.4	12.747	3.138	12.456	0.579	12.393	0.867
12.556	-3.502	12.372	1.024	12.473	0.388	12.787	3.368	12.495	0.658	12.432	0.995
12.595	-3.591	12.41	0.987	12.512	0.365	12.827	3.611	12.534	0.657	12.471	1.061
12.634	-3.664	12.449	0.959	12.551	0.348	12.867	3.733	12.573	0.603	12.51	1.025
12.673	-3.728	12.488	0.947	12.59	0.339	12.907	3.7	12.612	0.515	12.549	0.948
12.713	-3.784	12.526	1.017	12.629	0.33	12.947	3.585	12.651	0.4	12.588	0.829
12.752	-3.841	12.565	1.177	12.668	0.323	12.987	3.429	12.69	0.294	12.626	0.707
12.791	-3.883	12.603	1.346	12.707	0.313	13.027	3.261	12.729	0.189	12.665	0.573
12.83	-3.928	12.642	1.476	12.746	0.306	13.067	3.112	12.768	0.088	12.704	0.444
12.87	-3.96	12.681	1.546	12.785	0.348	13.107	3.041	12.807	0.01	12.743	0.322
12.909	-3.995	12.719	1.552	12.824	0.484	13.147	3.091	12.846	-0.004	12.782	0.216
12.948	-4.03	12.758	1.505	12.863	0.667	13.187	3.081	12.885	0.052	12.821	0.208
12.987	-4.061	12.797	1.432	12.902	0.843	13.227	3.057	12.924	0.072	12.859	0.24
13.026	-4.087	12.835	1.342	12.941	0.966	13.267	3.037	12.963	0.063	12.898	0.233
13.066	-4.112	12.874	1.228	12.98	1.021	13.307	3.017	13.003	0.046	12.937	0.213
13.105	-4.138	12.913	1.109	13.019	1.017	13.347	2.997	13.042	0.039	12.976	0.193
13.144	-4.157	12.951	0.993	13.058	0.97	13.387	2.989	13.081	0.021	13.015	0.168
13.183	-4.175	12.99	0.877	13.097	0.882	13.426	2.975	13.12	0.018	13.054	0.139
13.223	-4.196	13.029	0.765	13.136	0.775	13.466	2.974	13.159	0.004	13.093	0.12
13.262	-4.162	13.067	0.682	13.175	0.677	13.506	2.962	13.198	-0.005	13.131	0.108
13.301	-4.045	13.106	0.682	13.214	0.565	13.546	2.955	13.237	-0.009	13.17	0.1
13.34	-3.888	13.145	0.708	13.253	0.456	13.586	2.951	13.276	-0.02	13.209	0.076
13.38	-3.76	13.183	0.699	13.292	0.352	13.626	3.019	13.315	-0.034	13.248	0.067
13.419	-3.662	13.222	0.663	13.331	0.263	13.666	3.283	13.354	-0.053	13.287	0.056
13.458	-3.642	13.261	0.636	13.37	0.246	13.706	3.502	13.393	-0.069	13.326	0.051
13.497	-3.692	13.299	0.608	13.409	0.291	13.746	3.581	13.432	-0.082	13.365	0.039
13.537	-3.762	13.338	0.58	13.448	0.313	13.786	3.518	13.471	-0.086	13.403	0.03
13.576	-3.849	13.377	0.553	13.487	0.326	13.826	3.379	13.51	-0.082	13.442	0.022
13.615	-3.957	13.415	0.517	13.526	0.319	13.866	3.234	13.549	-0.022	13.481	0.035
13.654	-4.075	13.454	0.492	13.565	0.307	13.906	3.077	13.588	0.142	13.52	0.128
13.694	-4.182	13.493	0.47	13.604	0.308	13.946	2.944	13.627	0.348	13.559	0.304
13.733	-4.286	13.531	0.449	13.643	0.31	13.986	2.938	13.666	0.503	13.598	0.486
13.772	-4.387	13.57	0.434	13.681	0.32	14.026	3	13.705	0.578	13.637	0.617
13.811	-4.45	13.609	0.417	13.72	0.33	14.066	3.021	13.744	0.59	13.675	0.664
13.85	-4.443	13.647	0.398	13.759	0.339	14.106	3.037	13.783	0.548	13.714	0.646
13.89	-4.41	13.686	0.384	13.798	0.361	14.146	3.051	13.823	0.471	13.753	0.573
13.929	-4.412	13.725	0.377	13.837	0.373	14.186	3.071	13.862	0.387	13.792	0.475
13.968	-4.426	13.763	0.379	13.876	0.388	14.226	3.105	13.901	0.294	13.831	0.368
14.007	-4.44	13.802	0.372	13.915	0.413	14.266	3.131	13.94	0.207	13.87	0.257
14.047	-4.463	13.841	0.371	13.954	0.442	14.306	3.154	13.979	0.115	13.908	0.146
14.086	-4.486	13.879	0.398	13.993	0.472	14.346	3.187	14.018	0.056	13.947	0.045
14.125	-4.499	13.918	0.474	14.032	0.505	14.385	3.206	14.057	0.093	13.986	-0.013
14.164	-4.513	13.957	0.636	14.071	0.55	14.425	3.22	14.096	0.156	14.025	0.019
14.204	-4.526	13.995	0.81	14.11	0.595	14.465	3.237	14.135	0.187	14.064	0.06
14.243	-4.533	14.034	0.955	14.149	0.679	14.505	3.41	14.174	0.212	14.103	0.07
14.282	-4.543	14.073	1.056	14.188	0.847	14.545	3.683	14.213	0.249	14.142	0.058
14.321	-4.556	14.111	1.088	14.227	1.079	14.585	3.847	14.252	0.283	14.18	0.068
14.361	-4.554	14.15	1.072	14.266	1.315	14.625	3.838	14.291	0.323	14.219	0.06
14.4	-4.562	14.189	1.027	14.305	1.521	14.665	3.7	14.33	0.388	14.258	0.059
14.439	-4.568	14.227	0.957	14.344	1.676	14.705	3.522	14.369	0.459	14.297	0.069
14.478	-4.577	14.266	0.878	14.383	1.805	14.745	3.308	14.408	0.566	14.336	0.079
14.517	-4.584	14.305	0.8	14.422	1.906	14.785	3.109	14.447	0.69	14.375	0.094
14.557	-4.598	14.343	0.736	14.461	2.008	14.825	2.935	14.486	0.851	14.414	0.116
14.596	-4.598	14.382	0.678	14.5	2.13	14.865	2.931	14.525	1.042	14.452	0.146
14.635	-4.566	14.421	0.637	14.539	2.289	14.905	2.916	14.564	1.294	14.491	0.181
14.674	-4.454	14.459	0.643	14.578	2.499	14.945	2.874	14.603	1.598	14.53	0.23
14.714	-4.282	14.498	0.748	14.617	2.762	14.985	2.833	14.642	1.945	14.569	0.296
14.753	-4.111	14.537	0.893	14.656	3.072	15.025	2.817	14.682	2.38	14.608	0.387
14.792	-3.987	14.575	1.029	14.695	3.46	15.065	2.816	14.721	2.849	14.647	0.484
14.831	-3.934	14.614	1.18	14.734	3.964	15.105	2.828	14.76	3.447	14.685	0.596
14.871	-3.946	14.653	1.369	14.773	4.545	15.145	2.858	14.799	4.169	14.724	0.818
14.91	-3.998	14.691	1.585	14.812	5.122	15.185	2.915	14.838	4.92	14.763	1.138
14.949	-4.085	14.73	1.836	14.851	5.69	15.225	2.981	14.877	5.623	14.802	1.468
14.988	-4.19	14.769	2.11	14.89	6.246	15.265	3.061	14.916	6.238	14.841	1.752
15.028	-4.291	14.807	2.411	14.929	6.775	15.305	3.173	14.955	6.744	14.88	1.973
15.067	-4.403	14.846	2.743	14.968	7.265	15.345	3.343	14.994	7.138	14.919	2.098
15.106	-4.512	14.884	3.071	15.007	7.691	15.384	3.747	15.033	7.463	14.957	2.168
15.145	-4.61	14.923	3.412	15.046	8.045	15.424	4.16	15.072	7.673	14.996	2.207
15.184	-4.706	14.962	3.735	15.085	8.313	15.464	4.422	15.111	7.784	15.035	2.211
15.224	-4.74	15	4.042	15.124	8.486	15.504	4.551	15.15	7.793	15.074	2.183
15.263	-4.709	15.039	4.308	15.163	8.559	15.544	4.564	15.189	7.706	15.113	2.14
15.302	-4.691	15.078	4.536	15.202	8.549	15.584	4.528	15.228	7.545	15.152	2.059
15.341	-4.694	15.116	4.705	15.241	8.45	15.624	4.461	15.267	7.379	15.191	1.995
15.381	-4.709	15.155	4.819	15.28	8.27	15.664	4.401	15.306	7.144	15.229	1.985
15.42	-4.735	15.194	4.864	15.319	8.027	15.704	4.378	15.345	6.81	15.268	1.954
15.459	-4.747	15.232	4.855	15.358	7.722	15.744	4.483	15.384	6.386	15.307	1.875
15.498	-4.765	15.271	4.824	15.397	7.378	15.784	4.524	15.423	5.925	15.346	1.759
15.538	-4.771	15.31	4.812	15.436	7.021	15.824	4.515	15.462	5.427	15.385	1.625
15.577	-4.782	15.348	4.768	15.474	6.65	15.864	4.492	15.502	4.912	15.424	1.475
15.616	-4.789	15.387	4.663	15.513	6.301	15.904	4.437	15.541	4.398	15.462	1.316
15.655	-4.799	15.426	4.465	15.552	6.004	15.944	4.395	15.58	3.906	15.501	1.162
15.695	-4.814	15.464	4.183	15.591	5.815	15.984	4.343	15.619	3.432	15.54	1.008
15.734	-4.823	15.503	3.836	15.63	5.73	16.024	4.284	15.658	2.966	15.579	0.865
15.773	-4.833	15.542	3.443	15.669	5.706	16.064	4.243	15.697	2.569	15.618	0.726
15.812	-4.84	15.58	3.026	15.708	5.69	16.104	4.213	15.736	2.201	15.657	0.601
15.852	-4.847	15.619	2.603	15.747	5.676	16.144	4.221	15.775	1.886	15.696	0.487
15.891	-4.845	15.658	2.209	15.786	5.67	16.184	4.246	15.814	1.612	15.734	0.392
15.93	-4.845	15.696	1.833	15.825	5.689	16.224	4.403	15.853	1.388	15.773	0.303
15.969	-4.854	15.735	1.48	15.864	5.741	16.264	4.751	15.892	1.207	15.812	0.232
16.008	-4.848	15.774	1.158	15.903	5.85	16.304	5.092	15.931	1.06	15.851	0.176
16.048	-4.776	15.812	0.912	15.942	6.018	16.344	5.281	15.97	1.022	15.89	0.141
16.087	-4.612	15.851	0.764	15.981	6.262	16.383	5.345	16.009	1.142	15.929	0.178
16.126	-4.42	15.89	0.678	16.02	6.599	16.423	5.347	16.048	1.327	15.968	0.349
16.165	-4.254	15.928	0.584	16.059	7.023	16.463	5.317	16.087	1.475	16.006	0.54
16.205	-4.138	15.967	0.512	16.098	7.571	16.503	5.282	16.126	1.554	16.045	0.682
16.244	-4.099	16.006	0.451	16.137	8.288	16.543	5.235	16.165	1.584	16.084	0.735
16.283	-4.123	16.044	0.405	16.176	9.199	16.583	5.296	16.204	1.562	16.123	0.729
16.322	-4.183	16.083	0.369	16.215	10.236	16.623	5.383	16.243	1.512	16.162	0.678
16.362	-4.264	16.122	0.353	16.254	11.44	16.663	5.375	16.282	1.456	16.201	0.596
16.401	-4.361	16.16	0.34	16.293	12.815	16.703	5.31	16.322	1.382	16.239	0.488
16.44	-4.466	16.199	0.345	16.332	14.401	16.743	5.202	16.361	1.305	16.278	0.389
16.479	-4.576	16.238	0.359	16.371	16.215	16.783	5.053	16.4	1.223	16.317	0.284
16.519	-4.67	16.276	0.362	16.41	18.275	16.823	4.857	16.439	1.16	16.356	0.184
16.558	-4.761	16.315	0.368	16.449	20.578	16.863	4.643	16.478	1.163	16.395	0.11
16.597	-4.83	16.354	0.382	16.488	23.134	16.903	4.386	16.517	1.224	16.434	0.118
16.636	-4.827	16.392	0.398	16.527	25.952	16.943	4.103	16.556	1.241	16.473	0.176
16.675	-4.781	16.431	0.399	16.566	28.985	16.983	3.796	16.595	1.225	16.511	0.182
16.715	-4.766	16.47	0.413	16.605	32.217	17.023	3.489	16.634	1.168	16.55	0.172
16.754	-4.777	16.508	0.417	16.644	35.67	17.063	3.205	16.673	1.111	16.589	0.163
16.793	-4.791	16.547	0.417	16.683	39.248	17.103	3.055	16.712	1.044	16.628	0.152
16.832	-4.808	16.586	0.414	16.722	42.914	17.143	3.034	16.751	0.971	16.667	0.141
16.872	-4.816	16.624	0.439	16.761	46.585	17.183	2.934	16.79	0.886	16.706	0.125
16.911	-4.834	16.663	0.536	16.8	50.202	17.223	2.712	16.829	0.801	16.745	0.103
16.95	-4.85	16.702	0.707	16.839	53.685	17.263	2.384	16.868	0.711	16.783	0.087
16.989	-4.863	16.74	0.867	16.878	56.967	17.303	2.045	16.907	0.62	16.822	0.063
17.029	-4.875	16.779	0.986	16.917	59.978	17.343	1.698	16.946	0.532	16.861	0.046
17.068	-4.885	16.818	1.056	16.956	62.673	17.382	1.406	16.985	0.434	16.9	0.029
17.107	-4.902	16.856	1.059	16.995	64.999	17.422	1.159	17.024	0.348	16.939	0.008
17.146	-4.903	16.895	1.027	17.034	66.86	17.462	1.084	17.063	0.271	16.978	-0.003
17.186	-4.91	16.934	0.947	17.073	68.185	17.502	1.014	17.102	0.192	17.016	-0.034
17.225	-4.925	16.972	0.846	17.112	68.89	17.542	0.923	17.141	0.133	17.055	-0.052
17.264	-4.941	17.011	0.756	17.151	68.973	17.582	0.844	17.181	0.158	17.094	-0.055
17.303	-4.943	17.05	0.65	17.19	68.425	17.622	0.774	17.22	0.29	17.133	-0.031
17.342	-4.943	17.088	0.549	17.229	67.295	17.662	0.733	17.259	0.443	17.172	0.113
17.382	-4.945	17.127	0.453	17.268	65.628	17.702	0.694	17.298	0.54	17.211	0.322
17.421	-4.916	17.165	0.361	17.306	63.475	17.742	0.67	17.337	0.573	17.25	0.492
17.46	-4.816	17.204	0.321	17.345	60.89	17.782	0.652	17.376	0.529	17.288	0.593
17.499	-4.636	17.243	0.355	17.384	57.959	17.822	0.641	17.415	0.437	17.327	0.615
17.539	-4.459	17.281	0.384	17.423	54.729	17.862	0.635	17.454	0.321	17.366	0.555
17.578	-4.34	17.32	0.388	17.462	51.253	17.902	0.645	17.493	0.188	17.405	0.464
17.617	-4.265	17.359	0.388	17.501	47.585	17.942	0.7	17.532	0.06	17.444	0.361
17.656	-4.268	17.397	0.374	17.54	43.95	17.982	0.971	17.571	-0.059	17.483	0.24
17.696	-4.31	17.436	0.372	17.579	40.296	18.022	1.226	17.61	-0.163	17.522	0.128
17.735	-4.374	17.475	0.372	17.618	36.663	18.062	1.349	17.649	-0.245	17.56	0.013
17.774	-4.472	17.513	0.368	17.657	33.124	18.102	1.346	17.688	-0.221	17.599	-0.098
17.813	-4.576	17.552	0.367	17.696	29.72	18.142	1.25	17.727	-0.184	17.638	-0.134
17.853	-4.678	17.591	0.373	17.735	26.488	18.182	1.134	17.766	-0.182	17.677	-0.097
17.892	-4.777	17.629	0.375	17.774	23.458	18.222	1.018	17.805	-0.188	17.716	-0.065
17.931	-4.878	17.668	0.384	17.813	20.683	18.262	0.926	17.844	-0.202	17.755	-0.063
17.97	-4.957	17.707	0.397	17.852	18.127	18.302	0.938	17.883	-0.212	17.793	-0.06
18.01	-4.967	17.745	0.411	17.891	15.816	18.342	1.043	17.922	-0.219	17.832	-0.062
18.049	-4.919	17.784	0.419	17.93	13.735	18.381	1.106	17.961	-0.219	17.871	-0.059
18.088	-4.891	17.823	0.426	17.969	11.883	18.421	1.152	18.001	-0.219	17.91	-0.063
18.127	-4.886	17.861	0.434	18.008	10.259	18.461	1.21	18.04	-0.232	17.949	-0.061
18.166	-4.902	17.9	0.446	18.047	8.836	18.501	1.277	18.079	-0.227	17.988	-0.061
18.206	-4.907	17.939	0.469	18.086	7.605	18.541	1.357	18.118	-0.222	18.027	-0.052
18.245	-4.912	17.977	0.481	18.125	6.549	18.581	1.437	18.157	-0.223	18.065	-0.047
18.284	-4.913	18.016	0.539	18.164	5.634	18.621	1.524	18.196	-0.215	18.104	-0.034
18.323	-4.913	18.055	0.685	18.203	4.844	18.661	1.623	18.235	-0.213	18.143	-0.03
18.363	-4.916	18.093	0.89	18.242	4.181	18.701	1.716	18.274	-0.202	18.182	-0.022
18.402	-4.919	18.132	1.077	18.281	3.615	18.741	1.818	18.313	-0.199	18.221	-0.016
18.441	-4.921	18.171	1.209	18.32	3.179	18.781	1.926	18.352	-0.183	18.26	-0.005
18.48	-4.911	18.209	1.276	18.359	2.899	18.821	2.16	18.391	-0.133	18.299	0.011
18.52	-4.908	18.248	1.283	18.398	2.75	18.861	2.551	18.43	0.003	18.337	0.06
18.559	-4.909	18.287	1.247	18.437	2.641	18.901	2.859	18.469	0.219	18.376	0.208
18.598	-4.899	18.325	1.183	18.476	2.522	18.941	2.993	18.508	0.399	18.415	0.455
18.637	-4.898	18.364	1.098	18.515	2.366	18.981	2.986	18.547	0.517	18.454	0.658
18.677	-4.889	18.403	0.991	18.554	2.21	19.021	2.923	18.586	0.56	18.493	0.781
18.716	-4.879	18.441	0.883	18.593	2.03	19.061	2.82	18.625	0.528	18.532	0.818
18.755	-4.873	18.48	0.792	18.632	1.841	19.101	2.71	18.664	0.461	18.571	0.789
18.794	-4.852	18.519	0.701	18.671	1.654	19.141	2.619	18.703	0.384	18.609	0.722
18.833	-4.778	18.557	0.607	18.71	1.467	19.181	2.675	18.742	0.292	18.648	0.626
18.873	-4.624	18.596	0.571	18.749	1.296	19.221	2.753	18.781	0.204	18.687	0.533
18.912	-4.44	18.635	0.604	18.788	1.136	19.261	2.767	18.82	0.12	18.726	0.422
18.951	-4.302	18.673	0.627	18.827	0.992	19.301	2.774	18.86	0.052	18.765	0.319
18.99	-4.206	18.712	0.618	18.866	0.871	19.341	2.781	18.899	0.046	18.804	0.222
19.03	-4.182	18.751	0.589	18.905	0.817	19.38	2.793	18.938	0.116	18.842	0.179
19.069	-4.195	18.789	0.559	18.944	0.826	19.42	2.782	18.977	0.152	18.881	0.218
19.108	-4.252	18.828	0.546	18.983	0.825	19.46	2.788	19.016	0.178	18.92	0.264
19.147	-4.319	18.867	0.525	19.022	0.813	19.5	2.787	19.055	0.191	18.959	0.271
19.187	-4.409	18.905	0.503	19.061	0.792	19.54	2.779	19.094	0.207	18.998	0.277
19.226	-4.51	18.944	0.487	19.099	0.765	19.58	2.78	19.133	0.219	19.037	0.282
19.265	-4.596	18.983	0.47	19.138	0.742	19.62	2.776	19.172	0.25	19.076	0.278
19.304	-4.674	19.021	0.441	19.177	0.723	19.66	2.796	19.211	0.277	19.114	0.278
19.344	-4.752	19.06	0.427	19.216	0.711	19.7	2.999	19.25	0.304	19.153	0.288
19.383	-4.801	19.099	0.411	19.255	0.7	19.74	3.275	19.289	0.339	19.192	0.302
19.422	-4.767	19.137	0.403	19.294	0.688	19.78	3.411	19.328	0.373	19.231	0.308
19.461	-4.732	19.176	0.39	19.333	0.682	19.82	3.369	19.367	0.419	19.27	0.318
19.5	-4.728	19.215	0.368	19.372	0.68	19.86	3.215	19.406	0.473	19.309	0.324
19.54	-4.731	19.253	0.357	19.411	0.672	19.9	3.004	19.445	0.52	19.348	0.344
19.579	-4.737	19.292	0.354	19.45	0.67	19.94	2.781	19.484	0.575	19.386	0.364
19.618	-4.746	19.33	0.35	19.489	0.671	19.98	2.571	19.523	0.652	19.425	0.384
19.657	-4.761	19.369	0.35	19.528	0.664	20.02	2.394	19.562	0.717	19.464	0.398
19.697	-4.773	19.408	0.409	19.567	0.67	20.06	2.379	19.601	0.812	19.503	0.421
19.736	-4.785	19.446	0.566	19.606	0.677	20.1	2.342	19.64	1.023	19.542	0.476
19.775	-4.797	19.485	0.743	19.645	0.674	20.14	2.268	19.68	1.293	19.581	0.622
19.814	-4.806	19.524	0.895	19.684	0.706	20.18	2.185	19.719	1.555	19.619	0.854
19.854	-4.814	19.562	0.988	19.723	0.822	20.22	2.126	19.758	1.741	19.658	1.073
19.893	-4.825	19.601	1.021	19.762	0.993	20.26	2.052	19.797	1.842	19.697	1.239
19.932	-4.836	19.64	1.007	19.801	1.175	20.3	1.999	19.836	1.89	19.736	1.336
19.971	-4.846	19.678	0.944	19.84	1.318	20.339	1.935	19.875	1.883	19.775	1.357
20.011	-4.854	19.717	0.863	19.879	1.389	20.379	1.884	19.914	1.869	19.814	1.336
20.05	-4.853	19.756	0.781	19.918	1.387	20.419	1.816	19.953	1.858	19.853	1.307
20.089	-4.861	19.794	0.687	19.957	1.346	20.459	1.779	19.992	1.833	19.891	1.279
20.128	-4.866	19.833	0.593	19.996	1.264	20.499	1.727	20.031	1.811	19.93	1.234
20.168	-4.87	19.872	0.504	20.035	1.161	20.539	1.734	20.07	1.793	19.969	1.203
20.207	-4.819	19.91	0.418	20.074	1.038	20.579	1.931	20.109	1.867	20.008	1.195
20.246	-4.703	19.949	0.353	20.113	0.912	20.619	2.17	20.148	2.001	20.047	1.232
20.285	-4.536	19.988	0.37	20.152	0.791	20.659	2.279	20.187	2.122	20.086	1.373
20.324	-4.383	20.026	0.414	20.191	0.674	20.699	2.236	20.226	2.223	20.125	1.516
20.364	-4.276	20.065	0.428	20.23	0.579	20.739	2.12	20.265	2.338	20.163	1.643
20.403	-4.225	20.104	0.426	20.269	0.527	20.779	1.98	20.304	2.444	20.202	1.766
20.442	-4.237	20.142	0.424	20.308	0.546	20.819	1.834	20.343	2.563	20.241	1.887
20.481	-4.29	20.181	0.422	20.347	0.559	20.859	1.721	20.382	2.694	20.28	2.007
20.521	-4.366	20.22	0.42	20.386	0.531	20.899	1.699	20.421	2.852	20.319	2.138
20.56	-4.45	20.258	0.421	20.425	0.507	20.939	1.819	20.46	3.012	20.358	2.275
20.599	-4.569	20.297	0.433	20.464	0.47	20.979	1.883	20.499	3.188	20.396	2.405
20.638	-4.682	20.336	0.43	20.503	0.443	21.019	1.942	20.539	3.391	20.435	2.534
20.678	-4.775	20.374	0.44	20.542	0.419	21.059	2.011	20.578	3.607	20.474	2.654
20.717	-4.865	20.413	0.453	20.581	0.389	21.099	2.088	20.617	3.845	20.513	2.757
20.756	-4.942	20.452	0.465	20.62	0.364	21.139	2.161	20.656	4.113	20.552	2.852
20.795	-4.938	20.49	0.479	20.659	0.344	21.179	2.245	20.695	4.425	20.591	2.936
20.835	-4.895	20.529	0.493	20.698	0.336	21.219	2.324	20.734	4.747	20.63	2.996
20.874	-4.891	20.568	0.512	20.737	0.317	21.259	2.398	20.773	5.122	20.668	3.037
20.913	-4.895	20.606	0.531	20.776	0.303	21.299	2.471	20.812	5.562	20.707	3.066
20.952	-4.893	20.645	0.556	20.815	0.294	21.338	2.52	20.851	6.143	20.746	3.091
20.991	-4.902	20.684	0.574	20.854	0.295	21.378	2.558	20.89	6.81	20.785	3.172
21.031	-4.907	20.722	0.6	20.893	0.3	21.418	2.666	20.929	7.508	20.824	3.311
21.07	-4.909	20.761	0.638	20.931	0.305	21.458	2.912	20.968	8.185	20.863	3.438
21.109	-4.915	20.8	0.734	20.97	0.303	21.498	3.121	21.007	8.835	20.902	3.483
21.148	-4.923	20.838	0.91	21.009	0.318	21.538	3.175	21.046	9.493	20.94	3.434
21.188	-4.919	20.877	1.107	21.048	0.365	21.578	3.064	21.085	10.14	20.979	3.303
21.227	-4.913	20.916	1.263	21.087	0.49	21.618	2.865	21.124	10.864	21.018	3.124
21.266	-4.906	20.954	1.372	21.126	0.674	21.658	2.632	21.163	11.624	21.057	2.916
21.305	-4.915	20.993	1.421	21.165	0.845	21.698	2.375	21.202	12.458	21.096	2.7
21.345	-4.915	21.032	1.424	21.204	0.986	21.738	2.136	21.241	13.361	21.135	2.481
21.384	-4.911	21.07	1.386	21.243	1.087	21.778	2.019	21.28	14.366	21.173	2.253
21.423	-4.912	21.109	1.318	21.282	1.113	21.818	1.944	21.319	15.513	21.212	2.035
21.462	-4.916	21.148	1.249	21.321	1.081	21.858	1.817	21.359	16.853	21.251	1.879
21.502	-4.916	21.186	1.174	21.36	1.025	21.898	1.688	21.398	18.342	21.29	1.809
21.541	-4.914	21.225	1.095	21.399	0.956	21.938	1.563	21.437	19.835	21.329	1.739
21.58	-4.907	21.264	1.02	21.438	0.854	21.978	1.453	21.476	21.452	21.368	1.648
21.619	-4.831	21.302	0.958	21.477	0.764	22.018	1.362	21.515	23.135	21.407	1.556
21.658	-4.66	21.341	0.925	21.516	0.672	22.058	1.272	21.554	24.891	21.445	1.465
21.698	-4.476	21.38	0.966	21.555	0.579	22.098	1.203	21.593	26.717	21.484	1.393
21.737	-4.32	21.418	1.026	21.594	0.502	22.138	1.13	21.632	28.651	21.523	1.329
21.776	-4.237	21.457	1.05	21.633	0.486	22.178	1.081	21.671	30.609	21.562	1.274
21.815	-4.22	21.496	1.068	21.672	0.512	22.218	1.039	21.71	32.61	21.601	1.227
21.855	-4.259	21.534	1.079	21.711	0.521	22.258	1.008	21.749	34.752	21.64	1.189
21.894	-4.34	21.573	1.092	21.75	0.5	22.298	1.067	21.788	36.75	21.679	1.163
21.933	-4.427	21.611	1.109	21.789	0.468	22.337	1.308	21.827	38.771	21.717	1.145
21.972	-4.529	21.65	1.126	21.828	0.437	22.377	1.505	21.866	40.733	21.756	1.129
22.012	-4.634	21.689	1.143	21.867	0.417	22.417	1.544	21.905	42.645	21.795	1.12
22.051	-4.735	21.727	1.155	21.906	0.387	22.457	1.435	21.944	44.422	21.834	1.108
22.09	-4.842	21.766	1.178	21.945	0.357	22.497	1.269	21.983	46.13	21.873	1.103
22.129	-4.947	21.805	1.213	21.984	0.327	22.537	1.076	22.022	47.757	21.912	1.111
22.169	-4.994	21.843	1.236	22.023	0.299	22.577	0.88	22.061	49.309	21.95	1.134
22.208	-4.969	21.882	1.256	22.062	0.273	22.617	0.693	22.1	50.757	21.989	1.239
22.247	-4.938	21.921	1.29	22.101	0.254	22.657	0.635	22.139	51.886	22.028	1.423
22.286	-4.94	21.959	1.323	22.14	0.235	22.697	0.641	22.179	52.749	22.067	1.616
22.326	-4.957	21.998	1.356	22.179	0.21	22.737	0.588	22.218	53.316	22.106	1.761
22.365	-4.968	22.037	1.396	22.218	0.193	22.777	0.527	22.257	53.607	22.145	1.821
22.404	-4.987	22.075	1.434	22.257	0.185	22.817	0.471	22.296	53.632	22.184	1.812
22.443	-5	22.114	1.486	22.296	0.166	22.857	0.411	22.335	53.422	22.222	1.751
22.482	-5	22.153	1.548	22.335	0.142	22.897	0.358	22.374	52.95	22.261	1.677
22.522	-5.009	22.191	1.691	22.374	0.143	22.937	0.315	22.413	52.276	22.3	1.586
22.561	-5.028	22.23	1.905	22.413	0.153	22.977	0.266	22.452	51.335	22.339	1.48
22.6	-5.036	22.269	2.136	22.452	0.22	23.017	0.233	22.491	50.25	22.378	1.391
22.639	-5.038	22.307	2.324	22.491	0.365	23.057	0.208	22.53	49.039	22.417	1.303
22.679	-5.042	22.346	2.468	22.53	0.521	23.097	0.162	22.569	47.707	22.456	1.24
22.718	-5.05	22.385	2.551	22.569	0.631	23.137	0.151	22.608	46.189	22.494	1.276
22.757	-5.061	22.423	2.589	22.608	0.693	23.177	0.27	22.647	44.533	22.533	1.309
22.796	-5.066	22.462	2.614	22.647	0.688	23.217	0.554	22.686	42.762	22.572	1.303
22.836	-5.06	22.501	2.626	22.686	0.638	23.257	0.753	22.725	40.861	22.611	1.281
22.875	-5.061	22.539	2.637	22.725	0.563	23.297	0.773	22.764	38.942	22.65	1.254
22.914	-5.074	22.578	2.646	22.763	0.466	23.336	0.668	22.803	36.893	22.689	1.225
22.953	-5.077	22.617	2.668	22.802	0.355	23.376	0.495	22.842	34.917	22.728	1.193
22.993	-5.052	22.655	2.717	22.841	0.236	23.416	0.312	22.881	32.881	22.766	1.177
23.032	-4.939	22.694	2.787	22.88	0.124	23.456	0.124	22.92	30.872	22.805	1.146
23.071	-4.743	22.733	2.908	22.919	0.02	23.496	-0.041	22.959	28.885	22.844	1.114
23.11	-4.546	22.771	3.11	22.958	-0.071	23.536	-0.054	22.998	26.942	22.883	1.086
23.149	-4.405	22.81	3.34	22.997	-0.111	23.576	-0.033	23.038	25.043	22.922	1.056
23.189	-4.331	22.849	3.562	23.036	-0.086	23.616	-0.052	23.077	23.14	22.961	1.029
23.228	-4.318	22.887	3.782	23.075	-0.074	23.656	-0.085	23.116	21.401	22.999	0.996
23.267	-4.367	22.926	4.01	23.114	-0.091	23.696	-0.103	23.155	19.695	23.038	0.956
23.306	-4.447	22.965	4.246	23.153	-0.121	23.736	-0.122	23.194	18.134	23.077	0.919
23.346	-4.529	23.003	4.499	23.192	-0.145	23.776	-0.138	23.233	16.717	23.116	0.888
23.385	-4.633	23.042	4.765	23.231	-0.167	23.816	-0.157	23.272	15.51	23.155	0.862
23.424	-4.75	23.081	5.043	23.27	-0.193	23.856	-0.161	23.311	14.392	23.194	0.911
23.463	-4.854	23.119	5.328	23.309	-0.208	23.896	-0.163	23.35	13.325	23.233	1.071
23.503	-4.958	23.158	5.61	23.348	-0.224	23.936	-0.177	23.389	12.269	23.271	1.235
23.542	-5.049	23.197	5.903	23.387	-0.242	23.976	-0.173	23.428	11.179	23.31	1.343
23.581	-5.089	23.235	6.204	23.426	-0.253	24.016	-0.146	23.467	10.192	23.349	1.384
23.62	-5.068	23.274	6.512	23.465	-0.27	24.056	0.063	23.506	9.251	23.388	1.346
23.66	-5.029	23.313	6.81	23.504	-0.281	24.096	0.359	23.545	8.385	23.427	1.248
23.699	-5.026	23.351	7.116	23.543	-0.286	24.136	0.54	23.584	7.59	23.466	1.129
23.738	-5.029	23.39	7.425	23.582	-0.306	24.176	0.55	23.623	6.87	23.505	1
23.777	-5.041	23.429	7.731	23.621	-0.316	24.216	0.447	23.662	6.216	23.543	0.867
23.817	-5.046	23.467	8.043	23.66	-0.321	24.256	0.298	23.701	5.655	23.582	0.744
23.856	-5.062	23.506	8.349	23.699	-0.326	24.296	0.142	23.74	5.25	23.621	0.61
23.895	-5.068	23.545	8.689	23.738	-0.331	24.335	-0.023	23.779	4.895	23.66	0.521
23.934	-5.072	23.583	9.119	23.777	-0.307	24.375	-0.12	23.818	4.563	23.699	0.52
23.973	-5.077	23.622	9.606	23.816	-0.205	24.415	-0.064	23.858	4.253	23.738	0.553
24.013	-5.086	23.661	10.088	23.855	-0.041	24.455	-0.039	23.897	3.992	23.776	0.546
24.052	-5.082	23.699	10.532	23.894	0.122	24.495	-0.04	23.936	3.758	23.815	0.526
24.091	-5.086	23.738	10.919	23.933	0.238	24.535	-0.057	23.975	3.536	23.854	0.505
24.13	-5.094	23.777	11.241	23.972	0.289	24.575	-0.055	24.014	3.347	23.893	0.494
24.17	-5.098	23.815	11.512	24.011	0.283	24.615	-0.047	24.053	3.168	23.932	0.476
24.209	-5.103	23.854	11.762	24.05	0.234	24.655	-0.038	24.092	3.013	23.971	0.46
24.248	-5.103	23.892	12.011	24.089	0.17	24.695	-0.042	24.131	2.854	24.01	0.457
24.287	-5.094	23.931	12.243	24.128	0.091	24.735	-0.034	24.17	2.716	24.048	0.437
24.327	-5.095	23.97	12.472	24.167	-0.008	24.775	-0.018	24.209	2.584	24.087	0.431
24.366	-5.098	24.008	12.7	24.206	-0.112	24.815	-0.002	24.248	2.456	24.126	0.425
24.405	-5.064	24.047	12.945	24.245	-0.199	24.855	0.003	24.287	2.341	24.165	0.428
24.444	-4.932	24.086	13.201	24.284	-0.279	24.895	0.072	24.326	2.227	24.204	0.425
24.484	-4.748	24.124	13.515	24.323	-0.349	24.935	0.319	24.365	2.099	24.243	0.422
24.523	-4.571	24.163	13.907	24.362	-0.355	24.975	0.587	24.404	1.991	24.282	0.422
24.562	-4.449	24.202	14.301	24.401	-0.306	25.015	0.716	24.443	1.948	24.32	0.424
24.601	-4.394	24.24	14.672	24.44	-0.282	25.055	0.688	24.482	1.993	24.359	0.44
24.64	-4.397	24.279	15.042	24.479	-0.288	25.095	0.559	24.521	2.065	24.398	0.523
24.68	-4.441	24.318	15.432	24.518	-0.289	25.135	0.424	24.56	2.083	24.437	0.723
24.719	-4.514	24.356	15.828	24.557	-0.296	25.175	0.275	24.599	2.027	24.476	0.919
24.758	-4.607	24.395	16.23	24.595	-0.304	25.215	0.139	24.638	1.894	24.515	1.078
24.797	-4.7	24.434	16.644	24.634	-0.317	25.255	0.079	24.677	1.707	24.553	1.134
24.837	-4.802	24.472	17.06	24.673	-0.326	25.294	0.145	24.717	1.506	24.592	1.128
24.876	-4.905	24.511	17.49	24.712	-0.326	25.334	0.139	24.756	1.279	24.631	1.063
24.915	-5.002	24.55	17.936	24.751	-0.327	25.374	0.117	24.795	1.052	24.67	0.973
24.954	-5.087	24.588	18.38	24.79	-0.328	25.414	0.097	24.834	0.822	24.709	0.872
24.994	-5.11	24.627	18.846	24.829	-0.324	25.454	0.084	24.873	0.608	24.748	0.753
25.033	-5.06	24.666	19.316	24.868	-0.323	25.494	0.07	24.912	0.423	24.787	0.631
25.072	-5.044	24.704	19.792	24.907	-0.325	25.534	0.056	24.951	0.342	24.825	0.53
25.111	-5.041	24.743	20.297	24.946	-0.324	25.574	0.043	24.99	0.271	24.864	0.449
25.151	-5.046	24.782	20.79	24.985	-0.319	25.614	0.022	25.029	0.17	24.903	0.446
25.19	-5.057	24.82	21.307	25.024	-0.31	25.654	0.008	25.068	0.06	24.942	0.496
25.229	-5.071	24.859	21.824	25.063	-0.307	25.694	-0.003	25.107	-0.048	24.981	0.51
25.268	-5.078	24.898	22.348	25.102	-0.301	25.734	-0.003	25.146	-0.145	25.02	0.504
25.307	-5.084	24.936	22.946	25.141	-0.278	25.774	0.044	25.185	-0.238	25.059	0.499
25.347	-5.089	24.975	23.65	25.18	-0.171	25.814	0.283	25.224	-0.325	25.097	0.49
25.386	-5.096	25.014	24.397	25.219	-0.016	25.854	0.533	25.263	-0.413	25.136	0.483
25.425	-5.1	25.052	25.113	25.258	0.142	25.894	0.627	25.302	-0.492	25.175	0.475
25.464	-5.114	25.091	25.795	25.297	0.26	25.934	0.566	25.341	-0.564	25.214	0.473
25.504	-5.12	25.13	26.418	25.336	0.322	25.974	0.442	25.38	-0.618	25.253	0.476
25.543	-5.114	25.168	26.993	25.375	0.317	26.014	0.287	25.419	-0.681	25.292	0.476
25.582	-5.109	25.207	27.52	25.414	0.279	26.054	0.126	25.458	-0.733	25.33	0.482
25.621	-5.115	25.246	28.037	25.453	0.218	26.094	-0.035	25.497	-0.775	25.369	0.48
25.661	-5.118	25.284	28.536	25.492	0.129	26.134	-0.092	25.537	-0.82	25.408	0.492
25.7	-5.116	25.323	29.038	25.531	0.032	26.174	-0.034	25.576	-0.861	25.447	0.49
25.739	-5.118	25.362	29.529	25.57	-0.055	26.214	-0.037	25.615	-0.882	25.486	0.504
25.778	-5.116	25.4	30.025	25.609	-0.143	26.254	-0.057	25.654	-0.805	25.525	0.513
25.818	-5.059	25.439	30.532	25.648	-0.235	26.293	-0.074	25.693	-0.644	25.564	0.542
25.857	-4.925	25.478	31.054	25.687	-0.301	26.333	-0.09	25.732	-0.479	25.602	0.662
25.896	-4.743	25.516	31.637	25.726	-0.299	26.373	-0.094	25.771	-0.366	25.641	0.871
25.935	-4.589	25.555	32.27	25.765	-0.257	26.413	-0.097	25.81	-0.332	25.68	1.085
25.975	-4.485	25.594	32.899	25.804	-0.243	26.453	-0.112	25.849	-0.374	25.719	1.252
26.014	-4.439	25.632	33.497	25.843	-0.238	26.493	-0.118	25.888	-0.463	25.758	1.323
26.053	-4.454	25.671	34.071	25.882	-0.253	26.533	-0.118	25.927	-0.562	25.797	1.316
26.092	-4.509	25.71	34.646	25.921	-0.261	26.573	-0.116	25.966	-0.676	25.836	1.256
26.131	-4.585	25.748	35.22	25.96	-0.269	26.613	-0.115	26.005	-0.788	25.874	1.169
26.171	-4.669	25.787	35.787	25.999	-0.281	26.653	-0.055	26.044	-0.902	25.913	1.078
26.21	-4.753	25.826	36.321	26.038	-0.275	26.693	0.211	26.083	-1.005	25.952	0.967
26.249	-4.845	25.864	36.848	26.077	-0.277	26.733	0.49	26.122	-1.062	25.991	0.854
26.288	-4.938	25.903	37.354	26.116	-0.284	26.773	0.6	26.161	-1.033	26.03	0.767
26.328	-5.023	25.942	37.83	26.155	-0.294	26.813	0.566	26.2	-0.994	26.069	0.692
26.367	-5.077	25.98	38.259	26.194	-0.299	26.853	0.436	26.239	-0.997	26.107	0.712
26.406	-5.054	26.019	38.667	26.233	-0.293	26.893	0.289	26.278	-1.012	26.146	0.776
26.445	-5.01	26.058	39.029	26.272	-0.291	26.933	0.119	26.317	-1.017	26.185	0.797
26.485	-4.994	26.096	39.335	26.311	-0.294	26.973	-0.048	26.356	-1.027	26.224	0.802
26.524	-4.988	26.135	39.587	26.35	-0.293	27.013	-0.129	26.396	-1.035	26.263	0.806
26.563	-5.003	26.173	39.769	26.388	-0.292	27.053	-0.084	26.435	-1.033	26.302	0.803
26.602	-5.011	26.212	39.884	26.427	-0.288	27.093	-0.08	26.474	-1.049	26.341	0.8
26.642	-5.021	26.251	39.924	26.466	-0.269	27.133	-0.103	26.513	-1.06	26.379	0.809
26.681	-5.037	26.289	39.914	26.505	-0.181	27.173	-0.124	26.552	-1.058	26.418	0.819
26.72	-5.046	26.328	39.893	26.544	-0.031	27.213	-0.152	26.591	-1.061	26.457	0.823
26.759	-5.055	26.367	39.832	26.583	0.128	27.253	-0.171	26.63	-1.074	26.496	0.829
26.798	-5.06	26.405	39.674	26.622	0.247	27.292	-0.193	26.669	-1.08	26.535	0.83
26.838	-5.078	26.444	39.388	26.661	0.311	27.332	-0.209	26.708	-1.094	26.574	0.837
26.877	-5.08	26.483	38.96	26.7	0.325	27.372	-0.222	26.747	-1.094	26.613	0.833
26.916	-5.092	26.521	38.396	26.739	0.291	27.412	-0.221	26.786	-1.093	26.651	0.835
26.955	-5.105	26.56	37.692	26.778	0.22	27.452	-0.241	26.825	-1.105	26.69	0.839
26.995	-5.112	26.599	36.872	26.817	0.133	27.492	-0.251	26.864	-1.027	26.729	0.839
27.034	-5.128	26.637	35.952	26.856	0.037	27.532	-0.192	26.903	-0.833	26.768	0.85
27.073	-5.137	26.676	34.945	26.895	-0.059	27.572	0.074	26.942	-0.63	26.807	0.939
27.112	-5.146	26.715	33.856	26.934	-0.157	27.612	0.347	26.981	-0.49	26.846	1.126
27.152	-5.143	26.753	32.694	26.973	-0.263	27.652	0.461	27.02	-0.443	26.884	1.333
27.191	-5.084	26.792	31.464	27.012	-0.346	27.692	0.408	27.059	-0.461	26.923	1.467
27.23	-4.94	26.831	30.171	27.051	-0.372	27.732	0.261	27.098	-0.536	26.962	1.536
27.269	-4.773	26.869	28.873	27.09	-0.341	27.772	0.09	27.137	-0.642	27.001	1.526
27.309	-4.649	26.908	27.566	27.129	-0.332	27.812	-0.093	27.176	-0.759	27.04	1.458
27.348	-4.58	26.947	26.224	27.168	-0.345	27.852	-0.275	27.216	-0.892	27.079	1.367
27.387	-4.571	26.985	24.826	27.207	-0.361	27.892	-0.361	27.255	-1.025	27.118	1.255
27.426	-4.615	27.024	23.378	27.246	-0.379	27.932	-0.32	27.294	-1.149	27.156	1.132
27.465	-4.693	27.063	21.908	27.285	-0.397	27.972	-0.314	27.333	-1.244	27.195	1.015
27.505	-4.783	27.101	20.407	27.324	-0.415	28.012	-0.341	27.372	-1.26	27.234	0.904
27.544	-4.879	27.14	18.921	27.363	-0.438	28.052	-0.361	27.411	-1.223	27.273	0.81
27.583	-4.99	27.179	17.462	27.402	-0.456	28.092	-0.376	27.45	-1.22	27.312	0.81
27.622	-5.102	27.217	16.017	27.441	-0.462	28.132	-0.4	27.489	-1.247	27.351	0.859
27.662	-5.204	27.256	14.606	27.48	-0.471	28.172	-0.406	27.528	-1.265	27.39	0.868
27.701	-5.291	27.295	13.24	27.519	-0.49	28.212	-0.409	27.567	-1.273	27.428	0.849
27.74	-5.344	27.333	11.937	27.558	-0.503	28.252	-0.413	27.606	-1.289	27.467	0.834
27.779	-5.316	27.372	10.711	27.597	-0.514	28.291	-0.422	27.645	-1.31	27.506	0.823
27.819	-5.296	27.411	9.554	27.636	-0.516	28.331	-0.422	27.684	-1.316	27.545	0.82
27.858	-5.298	27.449	8.477	27.675	-0.528	28.371	-0.435	27.723	-1.325	27.584	0.81
27.897	-5.305	27.488	7.494	27.714	-0.542	28.411	-0.43	27.762	-1.342	27.623	0.806
27.936	-5.329	27.527	6.586	27.753	-0.531	28.451	-0.308	27.801	-1.354	27.662	0.796
27.976	-5.354	27.565	5.771	27.792	-0.54	28.491	-0.015	27.84	-1.357	27.7	0.79
28.015	-5.364	27.604	5.044	27.831	-0.537	28.531	0.227	27.879	-1.362	27.739	0.786
28.054	-5.379	27.643	4.402	27.87	-0.481	28.571	0.288	27.918	-1.373	27.778	0.789
28.093	-5.391	27.681	3.85	27.909	-0.338	28.611	0.207	27.957	-1.375	27.817	0.788
28.133	-5.402	27.72	3.453	27.948	-0.155	28.651	0.068	27.996	-1.37	27.856	0.784
28.172	-5.411	27.759	3.17	27.987	-0.006	28.691	-0.095	28.035	-1.364	27.895	0.782
28.211	-5.417	27.797	2.956	28.026	0.091	28.731	-0.264	28.075	-1.303	27.933	0.781
28.25	-5.425	27.836	2.76	28.065	0.119	28.771	-0.416	28.114	-1.118	27.972	0.79
28.289	-5.43	27.875	2.549	28.104	0.095	28.811	-0.42	28.153	-0.902	28.011	0.835
28.329	-5.444	27.913	2.326	28.143	0.037	28.851	-0.364	28.192	-0.718	28.05	0.97
28.368	-5.448	27.952	2.09	28.182	-0.05	28.891	-0.372	28.231	-0.628	28.089	1.17
28.407	-5.459	27.991	1.842	28.22	-0.149	28.931	-0.385	28.27	-0.624	28.128	1.337
28.446	-5.463	28.029	1.608	28.259	-0.251	28.971	-0.409	28.309	-0.678	28.167	1.434
28.486	-5.469	28.068	1.394	28.298	-0.347	29.011	-0.43	28.348	-0.782	28.205	1.451
28.525	-5.475	28.107	1.196	28.337	-0.444	29.051	-0.441	28.387	-0.888	28.244	1.415
28.564	-5.425	28.145	1.011	28.376	-0.541	29.091	-0.441	28.426	-1.002	28.283	1.347
28.603	-5.284	28.184	0.842	28.415	-0.6	29.131	-0.457	28.465	-1.139	28.322	1.243
28.643	-5.094	28.223	0.688	28.454	-0.591	29.171	-0.448	28.504	-1.253	28.361	1.133
28.682	-4.927	28.261	0.586	28.493	-0.558	29.211	-0.466	28.543	-1.35	28.4	1.024
28.721	-4.829	28.3	0.569	28.532	-0.553	29.251	-0.457	28.582	-1.384	28.439	0.921
28.76	-4.79	28.339	0.55	28.571	-0.548	29.29	-0.459	28.621	-1.35	28.477	0.831
28.8	-4.815	28.377	0.514	28.61	-0.568	29.33	-0.328	28.66	-1.325	28.516	0.805
28.839	-4.88	28.416	0.466	28.649	-0.577	29.37	-0.058	28.699	-1.333	28.555	0.85
28.878	-4.965	28.454	0.429	28.688	-0.592	29.41	0.14	28.738	-1.337	28.594	0.874
28.917	-5.052	28.493	0.381	28.727	-0.601	29.45	0.177	28.777	-1.35	28.633	0.871
28.956	-5.145	28.532	0.343	28.766	-0.605	29.49	0.084	28.816	-1.364	28.672	0.862
28.996	-5.252	28.57	0.309	28.805	-0.615	29.53	-0.051	28.855	-1.37	28.71	0.842
29.035	-5.357	28.609	0.272	28.844	-0.624	29.57	-0.201	28.895	-1.382	28.749	0.829
29.074	-5.463	28.648	0.24	28.883	-0.633	29.61	-0.357	28.934	-1.39	28.788	0.838
29.113	-5.535	28.686	0.213	28.922	-0.632	29.65	-0.487	28.973	-1.394	28.827	0.833
29.153	-5.535	28.725	0.181	28.961	-0.64	29.69	-0.461	29.012	-1.391	28.866	0.817
29.192	-5.493	28.764	0.146	29	-0.638	29.73	-0.422	29.051	-1.392	28.905	0.825
29.231	-5.488	28.802	0.119	29.039	-0.639	29.77	-0.443	29.09	-1.39	28.944	0.83
29.27	-5.5	28.841	0.099	29.078	-0.65	29.81	-0.467	29.129	-1.391	28.982	0.829
29.31	-5.511	28.88	0.082	29.117	-0.648	29.85	-0.475	29.168	-1.394	29.021	0.825
29.349	-5.526	28.918	0.053	29.156	-0.644	29.89	-0.489	29.207	-1.39	29.06	0.833
29.388	-5.536	28.957	0.026	29.195	-0.629	29.93	-0.508	29.246	-1.364	29.099	0.824
29.427	-5.544	28.996	0.003	29.234	-0.554	29.97	-0.513	29.285	-1.257	29.138	0.832
29.467	-5.554	29.034	-0.015	29.273	-0.389	30.01	-0.511	29.324	-1.055	29.177	0.839
29.506	-5.565	29.073	-0.027	29.312	-0.204	30.05	-0.516	29.363	-0.871	29.216	0.866
29.545	-5.576	29.112	-0.008	29.351	-0.049	30.09	-0.518	29.402	-0.74	29.254	0.981
29.584	-5.588	29.15	0.099	29.39	0.05	30.13	-0.504	29.441	-0.7	29.293	1.185
29.623	-5.586	29.189	0.26	29.429	0.075	30.17	-0.35	29.48	-0.725	29.332	1.366
29.663	-5.589	29.228	0.407	29.468	0.06	30.21	-0.073	29.519	-0.796	29.371	1.488
29.702	-5.593	29.266	0.502	29.507	0.002	30.25	0.123	29.558	-0.89	29.41	1.541
29.741	-5.6	29.305	0.534	29.546	-0.086	30.289	0.146	29.597	-1.003	29.449	1.514
29.78	-5.606	29.344	0.507	29.585	-0.181	30.329	0.051	29.636	-1.12	29.487	1.445
29.82	-5.607	29.382	0.445	29.624	-0.279	30.369	-0.086	29.675	-1.225	29.526	1.352
29.859	-5.608	29.421	0.357	29.663	-0.381	30.409	-0.237	29.715	-1.329	29.565	1.246
29.898	-5.618	29.46	0.26	29.702	-0.48	30.449	-0.402	29.754	-1.39	29.604	1.132
29.937	-5.614	29.498	0.146	29.741	-0.585	30.489	-0.51	29.793	-1.362	29.643	1.035
29.977	-5.555	29.537	0.03	29.78	-0.65	30.529	-0.488	29.832	-1.332	29.682	0.932
30.016	-5.394	29.576	-0.079	29.819	-0.639	30.569	-0.463	29.871	-1.331	29.721	0.873
30.055	-5.186	29.614	-0.193	29.858	-0.598	30.609	-0.481	29.91	-1.342	29.759	0.924
30.094	-5.017	29.653	-0.288	29.897	-0.584	30.649	-0.496	29.949	-1.355	29.798	0.953
30.134	-4.899	29.692	-0.315	29.936	-0.584	30.689	-0.514	29.988	-1.363	29.837	0.959
30.173	-4.852	29.73	-0.286	29.975	-0.598	30.729	-0.516	30.027	-1.374	29.876	0.951
30.212	-4.872	29.769	-0.274	30.014	-0.605	30.769	-0.526	30.066	-1.379	29.915	0.938
30.251	-4.937	29.808	-0.283	30.052	-0.609	30.809	-0.533	30.105	-1.39	29.954	0.94
30.291	-5.032	29.846	-0.299	30.091	-0.622	30.849	-0.536	30.144	-1.388	29.993	0.927
30.33	-5.138	29.885	-0.326	30.13	-0.619	30.889	-0.537	30.183	-1.393	30.031	0.929
30.369	-5.241	29.924	-0.348	30.169	-0.628	30.929	-0.54	30.222	-1.407	30.07	0.927
30.408	-5.348	29.962	-0.362	30.208	-0.635	30.969	-0.544	30.261	-1.414	30.109	0.931
30.447	-5.451	30.001	-0.373	30.247	-0.634	31.009	-0.517	30.3	-1.421	30.148	0.932
30.487	-5.558	30.04	-0.388	30.286	-0.639	31.049	-0.308	30.339	-1.423	30.187	0.928
30.526	-5.633	30.078	-0.4	30.325	-0.632	31.089	-0.011	30.378	-1.429	30.226	0.944
30.565	-5.623	30.117	-0.417	30.364	-0.628	31.129	0.167	30.417	-1.411	30.264	0.947
30.604	-5.584	30.156	-0.426	30.403	-0.629	31.169	0.174	30.456	-1.405	30.303	0.941
30.644	-5.576	30.194	-0.429	30.442	-0.63	31.209	0.051	30.495	-1.302	30.342	0.95
30.683	-5.579	30.233	-0.441	30.481	-0.63	31.248	-0.096	30.534	-1.121	30.381	0.964
30.722	-5.593	30.272	-0.444	30.52	-0.638	31.288	-0.254	30.574	-0.931	30.42	1.015
30.761	-5.608	30.31	-0.442	30.559	-0.626	31.328	-0.43	30.613	-0.826	30.459	1.201
30.801	-5.617	30.349	-0.448	30.598	-0.589	31.368	-0.567	30.652	-0.799	30.498	1.425
30.84	-5.632	30.388	-0.453	30.637	-0.471	31.408	-0.519	30.691	-0.823	30.536	1.59
30.879	-5.628	30.426	-0.462	30.676	-0.282	31.448	-0.496	30.73	-0.894	30.575	1.691
30.918	-5.634	30.465	-0.459	30.715	-0.105	31.488	-0.517	30.769	-0.987	30.614	1.714
30.958	-5.638	30.504	-0.412	30.754	0.032	31.528	-0.533	30.808	-1.097	30.653	1.672
30.997	-5.645	30.542	-0.28	30.793	0.108	31.568	-0.545	30.847	-1.211	30.692	1.587
31.036	-5.656	30.581	-0.099	30.832	0.108	31.608	-0.561	30.886	-1.313	30.731	1.487
31.075	-5.664	30.62	0.073	30.871	0.061	31.648	-0.556	30.925	-1.414	30.77	1.377
31.114	-5.66	30.658	0.196	30.91	-0.01	31.688	-0.562	30.964	-1.463	30.808	1.251
31.154	-5.664	30.697	0.25	30.949	-0.097	31.728	-0.569	31.003	-1.424	30.847	1.143
31.193	-5.672	30.735	0.244	30.988	-0.197	31.768	-0.567	31.042	-1.41	30.886	1.043
31.232	-5.669	30.774	0.2	31.027	-0.294	31.808	-0.563	31.081	-1.412	30.925	1.033
31.271	-5.671	30.813	0.115	31.066	-0.398	31.848	-0.562	31.12	-1.428	30.964	1.076
31.311	-5.673	30.851	0.019	31.105	-0.504	31.888	-0.48	31.159	-1.439	31.003	1.102
31.35	-5.658	30.89	-0.089	31.144	-0.592	31.928	-0.185	31.198	-1.451	31.041	1.097
31.389	-5.606	30.929	-0.191	31.183	-0.623	31.968	0.089	31.237	-1.468	31.08	1.081
31.428	-5.464	30.967	-0.298	31.222	-0.582	32.008	0.187	31.276	-1.476	31.119	1.082
31.468	-5.272	31.006	-0.397	31.261	-0.552	32.048	0.132	31.315	-1.48	31.158	1.07
31.507	-5.095	31.045	-0.484	31.3	-0.549	32.088	-0.006	31.354	-1.487	31.197	1.059
31.546	-4.983	31.083	-0.51	31.339	-0.563	32.128	-0.162	31.394	-1.495	31.236	1.055
31.585	-4.943	31.122	-0.471	31.378	-0.567	32.168	-0.33	31.433	-1.509	31.275	1.05
31.625	-4.966	31.161	-0.444	31.417	-0.579	32.208	-0.503	31.472	-1.505	31.313	1.049
31.664	-5.021	31.199	-0.447	31.456	-0.583	32.247	-0.557	31.511	-1.507	31.352	1.049
31.703	-5.105	31.238	-0.464	31.495	-0.596	32.287	-0.504	31.55	-1.512	31.391	1.054
31.742	-5.193	31.277	-0.476	31.534	-0.609	32.327	-0.497	31.589	-1.517	31.43	1.055
31.781	-5.299	31.315	-0.488	31.573	-0.61	32.367	-0.51	31.628	-1.516	31.469	1.056
31.821	-5.405	31.354	-0.496	31.612	-0.611	32.407	-0.531	31.667	-1.478	31.508	1.057
31.86	-5.509	31.393	-0.503	31.651	-0.613	32.447	-0.535	31.706	-1.345	31.547	1.056
31.899	-5.614	31.431	-0.51	31.69	-0.624	32.487	-0.546	31.745	-1.146	31.585	1.08
31.938	-5.692	31.47	-0.523	31.729	-0.63	32.527	-0.555	31.784	-0.984	31.624	1.192
31.978	-5.688	31.509	-0.523	31.768	-0.623	32.567	-0.552	31.823	-0.873	31.663	1.402
32.017	-5.649	31.547	-0.53	31.807	-0.627	32.607	-0.554	31.862	-0.85	31.702	1.608
32.056	-5.631	31.586	-0.536	31.845	-0.633	32.647	-0.556	31.901	-0.89	31.741	1.761
32.095	-5.636	31.625	-0.538	31.884	-0.622	32.687	-0.554	31.94	-0.977	31.78	1.825
32.135	-5.649	31.663	-0.544	31.923	-0.631	32.727	-0.539	31.979	-1.085	31.819	1.82
32.174	-5.662	31.702	-0.549	31.962	-0.623	32.767	-0.4	32.018	-1.193	31.857	1.747
32.213	-5.671	31.741	-0.553	32.001	-0.548	32.807	-0.112	32.057	-1.305	31.896	1.651
32.252	-5.676	31.779	-0.55	32.04	-0.398	32.847	0.099	32.096	-1.414	31.935	1.544
32.292	-5.684	31.818	-0.55	32.079	-0.232	32.887	0.138	32.135	-1.519	31.974	1.422
32.331	-5.7	31.857	-0.549	32.118	-0.084	32.927	0.062	32.174	-1.551	32.013	1.302
32.37	-5.703	31.895	-0.516	32.157	0.009	32.967	-0.078	32.213	-1.508	32.052	1.183
32.409	-5.704	31.934	-0.395	32.196	0.03	33.007	-0.237	32.253	-1.492	32.09	1.095
32.449	-5.707	31.973	-0.204	32.235	0.002	33.047	-0.407	32.292	-1.5	32.129	1.123
32.488	-5.714	32.011	-0.011	32.274	-0.064	33.087	-0.533	32.331	-1.506	32.168	1.161
32.527	-5.716	32.05	0.12	32.313	-0.147	33.127	-0.511	32.37	-1.517	32.207	1.169
32.566	-5.725	32.089	0.2	32.352	-0.227	33.167	-0.471	32.409	-1.525	32.246	1.163
32.605	-5.727	32.127	0.204	32.391	-0.319	33.207	-0.478	32.448	-1.542	32.285	1.159
32.645	-5.732	32.166	0.166	32.43	-0.418	33.246	-0.499	32.487	-1.545	32.324	1.151
32.684	-5.735	32.205	0.097	32.469	-0.515	33.286	-0.509	32.526	-1.551	32.362	1.144
32.723	-5.731	32.243	-0.006	32.508	-0.597	33.326	-0.525	32.565	-1.565	32.401	1.137
32.762	-5.68	32.282	-0.115	32.547	-0.645	33.366	-0.532	32.604	-1.564	32.44	1.135
32.802	-5.546	32.321	-0.224	32.586	-0.618	33.406	-0.533	32.643	-1.557	32.479	1.136
32.841	-5.395	32.359	-0.327	32.625	-0.578	33.446	-0.543	32.682	-1.558	32.518	1.14
32.88	-5.236	32.398	-0.438	32.664	-0.575	33.486	-0.542	32.721	-1.573	32.557	1.136
32.919	-5.124	32.437	-0.53	32.703	-0.587	33.526	-0.546	32.76	-1.57	32.596	1.138
32.959	-5.08	32.475	-0.572	32.742	-0.6	33.566	-0.535	32.799	-1.575	32.634	1.139
32.998	-5.095	32.514	-0.535	32.781	-0.609	33.606	-0.506	32.838	-1.571	32.673	1.14
33.037	-5.149	32.553	-0.507	32.82	-0.622	33.646	-0.305	32.877	-1.569	32.712	1.137
33.076	-5.232	32.591	-0.511	32.859	-0.626	33.686	-0.043	32.916	-1.555	32.751	1.144
33.116	-5.321	32.63	-0.512	32.898	-0.638	33.726	0.097	32.955	-1.437	32.79	1.149
33.155	-5.425	32.669	-0.521	32.937	-0.652	33.766	0.1	32.994	-1.231	32.829	1.215
33.194	-5.527	32.707	-0.532	32.976	-0.652	33.806	-0.003	33.033	-1.025	32.867	1.39
33.233	-5.621	32.746	-0.544	33.015	-0.651	33.846	-0.138	33.073	-0.886	32.906	1.614
33.272	-5.713	32.785	-0.554	33.054	-0.653	33.886	-0.304	33.112	-0.836	32.945	1.791
33.312	-5.777	32.823	-0.556	33.093	-0.653	33.926	-0.448	33.151	-0.872	32.984	1.889
33.351	-5.761	32.862	-0.556	33.132	-0.665	33.966	-0.531	33.19	-0.94	33.023	1.891
33.39	-5.725	32.901	-0.558	33.171	-0.661	34.006	-0.475	33.229	-1.055	33.062	1.843
33.429	-5.712	32.939	-0.565	33.21	-0.669	34.046	-0.458	33.268	-1.161	33.101	1.758
33.469	-5.711	32.978	-0.566	33.249	-0.678	34.086	-0.473	33.307	-1.286	33.139	1.656
33.508	-5.733	33.016	-0.562	33.288	-0.675	34.126	-0.498	33.346	-1.417	33.178	1.545
33.547	-5.744	33.055	-0.563	33.327	-0.665	34.166	-0.51	33.385	-1.525	33.217	1.427
33.586	-5.755	33.094	-0.563	33.366	-0.653	34.206	-0.525	33.424	-1.597	33.256	1.314
33.626	-5.769	33.132	-0.569	33.405	-0.568	34.245	-0.522	33.463	-1.568	33.295	1.212
33.665	-5.781	33.171	-0.572	33.444	-0.402	34.285	-0.53	33.502	-1.531	33.334	1.191
33.704	-5.79	33.21	-0.569	33.483	-0.233	34.325	-0.536	33.541	-1.527	33.373	1.233
33.743	-5.798	33.248	-0.561	33.522	-0.103	34.365	-0.534	33.58	-1.539	33.411	1.258
33.783	-5.806	33.287	-0.526	33.561	-0.023	34.405	-0.541	33.619	-1.552	33.45	1.266
33.822	-5.813	33.326	-0.419	33.6	-0.013	34.445	-0.519	33.658	-1.569	33.489	1.254
33.861	-5.817	33.364	-0.23	33.639	-0.051	34.485	-0.368	33.697	-1.58	33.528	1.245
33.9	-5.818	33.403	-0.035	33.677	-0.121	34.525	-0.078	33.736	-1.588	33.567	1.226
33.939	-5.82	33.442	0.107	33.716	-0.2	34.565	0.109	33.775	-1.591	33.606	1.218
33.979	-5.829	33.48	0.188	33.755	-0.302	34.605	0.135	33.814	-1.592	33.644	1.227
34.018	-5.832	33.519	0.211	33.794	-0.394	34.645	0.043	33.853	-1.602	33.683	1.225
34.057	-5.832	33.558	0.175	33.833	-0.475	34.685	-0.091	33.892	-1.598	33.722	1.223
34.096	-5.81	33.596	0.096	33.872	-0.569	34.725	-0.248	33.932	-1.601	33.761	1.22
34.136	-5.732	33.635	0.008	33.911	-0.658	34.765	-0.407	33.971	-1.597	33.8	1.22
34.175	-5.583	33.674	-0.086	33.95	-0.682	34.805	-0.538	34.01	-1.602	33.839	1.22
34.214	-5.419	33.712	-0.194	33.989	-0.639	34.845	-0.502	34.049	-1.601	33.878	1.22
34.253	-5.282	33.751	-0.305	34.028	-0.613	34.885	-0.468	34.088	-1.598	33.916	1.221
34.293	-5.197	33.79	-0.413	34.067	-0.613	34.925	-0.493	34.127	-1.572	33.955	1.22
34.332	-5.175	33.828	-0.508	34.106	-0.628	34.965	-0.504	34.166	-1.426	33.994	1.236
34.371	-5.209	33.867	-0.561	34.145	-0.643	35.005	-0.518	34.205	-1.211	34.033	1.27
34.41	-5.282	33.906	-0.531	34.184	-0.645	35.045	-0.525	34.244	-1.013	34.072	1.413
34.45	-5.357	33.944	-0.498	34.223	-0.652	35.085	-0.535	34.283	-0.879	34.111	1.605
34.489	-5.448	33.983	-0.491	34.262	-0.661	35.125	-0.526	34.322	-0.833	34.15	1.762
34.528	-5.548	34.022	-0.499	34.301	-0.668	35.165	-0.532	34.361	-0.863	34.188	1.869
34.567	-5.645	34.06	-0.507	34.34	-0.673	35.205	-0.536	34.4	-0.944	34.227	1.889
34.607	-5.74	34.099	-0.517	34.379	-0.684	35.244	-0.539	34.439	-1.058	34.266	1.836
34.646	-5.824	34.138	-0.52	34.418	-0.687	35.284	-0.541	34.478	-1.175	34.305	1.745
34.685	-5.853	34.176	-0.531	34.457	-0.684	35.324	-0.505	34.517	-1.293	34.344	1.649
34.724	-5.813	34.215	-0.542	34.496	-0.69	35.364	-0.268	34.556	-1.411	34.383	1.536
34.763	-5.782	34.254	-0.546	34.535	-0.697	35.404	0.027	34.595	-1.527	34.421	1.422
34.803	-5.784	34.292	-0.549	34.574	-0.698	35.444	0.185	34.634	-1.594	34.46	1.321
34.842	-5.799	34.331	-0.555	34.613	-0.69	35.484	0.186	34.673	-1.57	34.499	1.226
34.881	-5.804	34.37	-0.557	34.652	-0.694	35.524	0.065	34.712	-1.535	34.538	1.204
34.92	-5.812	34.408	-0.562	34.691	-0.702	35.564	-0.086	34.752	-1.523	34.577	1.251
34.96	-5.812	34.447	-0.559	34.73	-0.696	35.604	-0.268	34.791	-1.533	34.616	1.277
34.999	-5.82	34.486	-0.557	34.769	-0.63	35.644	-0.425	34.83	-1.547	34.655	1.263
35.038	-5.834	34.524	-0.56	34.808	-0.473	35.684	-0.529	34.869	-1.559	34.693	1.255
35.077	-5.842	34.563	-0.559	34.847	-0.297	35.724	-0.475	34.908	-1.568	34.732	1.239
35.117	-5.841	34.602	-0.558	34.886	-0.148	35.764	-0.458	34.947	-1.573	34.771	1.221
35.156	-5.848	34.64	-0.568	34.925	-0.048	35.804	-0.469	34.986	-1.582	34.81	1.218
35.195	-5.857	34.679	-0.568	34.964	-0.005	35.844	-0.484	35.025	-1.58	34.849	1.222
35.234	-5.855	34.718	-0.534	35.003	-0.024	35.884	-0.493	35.064	-1.582	34.888	1.212
35.274	-5.857	34.756	-0.433	35.042	-0.086	35.924	-0.499	35.103	-1.583	34.927	1.201
35.313	-5.859	34.795	-0.264	35.081	-0.175	35.964	-0.502	35.142	-1.582	34.965	1.202
35.352	-5.862	34.834	-0.086	35.12	-0.264	36.004	-0.497	35.181	-1.595	35.004	1.194
35.391	-5.861	34.872	0.054	35.159	-0.359	36.044	-0.503	35.22	-1.598	35.043	1.192
35.43	-5.859	34.911	0.13	35.198	-0.459	36.084	-0.5	35.259	-1.589	35.082	1.195
35.47	-5.838	34.95	0.144	35.237	-0.557	36.124	-0.501	35.298	-1.59	35.121	1.193
35.509	-5.734	34.988	0.098	35.276	-0.657	36.164	-0.491	35.337	-1.558	35.16	1.188
35.548	-5.579	35.027	0.021	35.315	-0.723	36.204	-0.395	35.376	-1.448	35.198	1.19
35.587	-5.442	35.066	-0.055	35.354	-0.702	36.243	-0.096	35.415	-1.235	35.237	1.217
35.627	-5.325	35.104	-0.148	35.393	-0.663	36.283	0.158	35.454	-1.032	35.276	1.346
35.666	-5.259	35.143	-0.249	35.432	-0.654	36.323	0.256	35.493	-0.897	35.315	1.537
35.705	-5.25	35.182	-0.344	35.471	-0.653	36.363	0.192	35.532	-0.851	35.354	1.726
35.744	-5.29	35.22	-0.44	35.509	-0.668			35.572	-0.879	35.393	1.838
35.784	-5.366	35.259	-0.528	35.548	-0.668			35.611	-0.956	35.432	1.86
35.823	-5.454	35.297	-0.575	35.587	-0.677			35.65	-1.059	35.47	1.825
35.862	-5.541	35.336	-0.548	35.626	-0.698			35.689	-1.175	35.509	1.753
35.901	-5.64	35.375	-0.511	35.665	-0.702			35.728	-1.294	35.548	1.652
35.941	-5.74	35.413	-0.511	35.704	-0.71			35.767	-1.416	35.587	1.557
35.98	-5.824	35.452	-0.518	35.743	-0.721			35.806	-1.525	35.626	1.452
36.019	-5.902	35.491	-0.533	35.782	-0.716			35.845	-1.58	35.665	1.335
36.058	-5.897	35.529	-0.539	35.821	-0.716			35.884	-1.54	35.704	1.236
36.097	-5.861	35.568	-0.544	35.86	-0.723			35.923	-1.503	35.742	1.196
36.137	-5.847	35.607	-0.559	35.899	-0.723			35.962	-1.514	35.781	1.234
36.176	-5.853	35.645	-0.565	35.938	-0.724			36.001	-1.52	35.82	1.257
36.215	-5.859	35.684	-0.577	35.977	-0.732			36.04	-1.533	35.859	1.254
36.254	-5.875	35.723	-0.587	36.016	-0.722			36.079	-1.54	35.898	1.243
36.294	-5.886	35.761	-0.594	36.055	-0.725			36.118	-1.546	35.937	1.24
36.333	-5.899	35.8	-0.593	36.094	-0.72			36.157	-1.556	35.975	1.232
36.372	-5.902	35.839	-0.589	36.133	-0.673			36.196	-1.556	36.014	1.22
		35.877	-0.593	36.172	-0.535			36.235	-1.566	36.053	1.209
		35.916	-0.597	36.211	-0.353			36.274	-1.571	36.092	1.204
		35.955	-0.606	36.25	-0.18			36.313	-1.569	36.131	1.204
		35.993	-0.611	36.289	-0.055			36.352	-1.579	36.17	1.192
		36.032	-0.599	36.328	0.002					36.209	1.197
		36.071	-0.599	36.367	-0.004					36.247	1.192
		36.109	-0.595							36.286	1.194
		36.148	-0.512							36.325	1.187
		36.187	-0.356							36.364	1.191
		36.225	-0.182
		36.264	-0.031
		36.303	0.053
		36.341	0.08

## Sheet: Supplementary Fig. 3A
	hSERINC2				hSERINC3				hSERINC5				hSERINC5 F397L				hSERINC5 S328I				A2A_AR
		ml	mAU			ml	mAU			ml	mAU			ml	mAU			ml	mAU			ml	mAU
		7.428	-1.111			0	0.382			0	-68.035			0	-9.171			0	-4.318			0	-9.171
		7.437	-1.058			0.04	-7.136			0.027	-99.728			0.04	0.046			0.0372494	-2			0.04	0.046
		7.446	-0.993			0.08	-14.394			0.053	-235.902			0.08	3.097			0.0744988	-1.914			0.08	3.097
		7.455	-0.996			0.12	-16.443			0.08	-244.935			0.12	13.494			0.111748	-2.06			0.12	13.494
		7.464	-1.072			0.16	-17.659			0.107	-245.935			0.16	7.341			0.148998	-1.464			0.16	7.341
		7.473	-1.178			0.2	-18.213			0.133	-246.471			0.2	3.887			0.186247	-1.771			0.2	3.887
		7.482	-1.254			0.24	-18.894			0.16	-246.974			0.24	2.74			0.223496	0.812			0.24	2.74
		7.491	-1.221			0.28	-19.199			0.187	-247.096			0.279	2.199			0.260746	8.683			0.279	2.199
		7.5	-1.143			0.32	-19.634			0.213	-0.013			0.319	1.903			0.297995	17.828			0.319	1.903
		7.508	-1.059			0.36	-19.716			0.24	-0.066			0.359	1.665			0.335245	15.71			0.359	1.665
		7.517	-0.988			0.4	-20			0.266	-0.244			0.399	1.49			0.372494	7.693			0.399	1.49
		7.526	-0.89			0.44	-19.879			0.293	-0.495			0.439	1.311			0.409743	3.255			0.439	1.311
		7.535	-0.808			0.48	-20.192			0.32	-0.473			0.479	1.181			0.446993	0.764			0.479	1.181
		7.544	-0.772			0.52	-20.219			0.346	-0.478			0.519	1.081			0.484242	-0.572			0.519	1.081
		7.553	-0.753			0.56	-20.48			0.373	-0.642			0.559	0.952			0.521492	-1.252			0.559	0.952
		7.562	-0.721			0.6	-20.729			0.4	-0.655			0.599	0.885			0.558741	-1.69			0.599	0.885
		7.571	-0.704			0.64	-20.78			0.426	-0.747			0.639	0.808			0.59599	-1.985			0.639	0.808
		7.58	-0.664			0.68	-20.579			0.453	-0.706			0.679	0.721			0.63324	-2.037			0.679	0.721
		7.589	-0.61			0.72	-20.665			0.48	-0.673			0.719	0.674			0.670489	-2.225			0.719	0.674
		7.598	-0.605			0.76	-20.939			0.506	-0.878			0.759	0.598			0.707739	-2.288			0.759	0.598
		7.607	-0.604			0.799	-20.666			0.533	-1.054			0.798	0.563			0.744988	-2.143			0.798	0.563
		7.616	-0.621			0.839	-20.926			0.56	-1.072			0.838	0.474			0.782237	-2.004			0.838	0.474
		7.625	-0.613			0.879	-21.027			0.586	-0.906			0.878	0.445			0.819487	-2.151			0.878	0.445
		7.634	-0.562			0.919	-20.999			0.613	-0.551			0.918	0.402			0.856736	-2.387			0.918	0.402
		7.643	-0.485			0.959	-21.108			0.639	-0.494			0.958	0.353			0.893986	-2.44			0.958	0.353
		7.652	-0.402			0.999	-20.821			0.666	-0.734			0.998	0.296			0.931235	-2.412			0.998	0.296
		7.661	-0.326			1.039	-20.654			0.693	-0.853			1.038	0.259			0.968484	-2.381			1.038	0.259
		7.67	-0.29			1.079	-20.864			0.719	-1.005			1.078	0.231			1.00573	-2.371			1.078	0.231
		7.679	-0.218			1.119	-20.915			0.746	-1.046			1.118	0.174			1.04298	-2.555			1.118	0.174
		7.688	-0.167			1.159	-21.077			0.773	-0.714			1.158	0.14			1.08023	-2.542			1.158	0.14
		7.697	-0.145			1.199	-21.234			0.799	-0.968			1.198	0.09			1.11748	-2.718			1.198	0.09
		7.706	-0.156			1.239	-21.336			0.826	-1.007			1.238	0.073			1.15473	-2.266			1.238	0.073
		7.715	-0.174			1.279	-21.482			0.853	-0.924			1.278	0.048			1.19198	-2.331			1.278	0.048
		7.724	-0.148			1.319	-21.657			0.879	-0.895			1.317	0.006			1.22923	-2.36			1.317	0.006
		7.733	-0.087			1.359	-21.543			0.906	-1.382			1.357	-0.002			1.26648	-2.664			1.357	-0.002
		7.742	-0.031			1.399	-21.353			0.933	-1.821			1.397	-0.026			1.30373	-2.372			1.397	-0.026
		7.751	0.036			1.439	-21.538			0.959	-1.696			1.437	-0.062			1.34098	-2.729			1.437	-0.062
		7.76	0.086			1.479	-21.672			0.986	-1.506			1.477	-0.074			1.37823	-2.738			1.477	-0.074
		7.769	0.146			1.519	-21.491			1.012	-1.716			1.517	-0.112			1.41548	-2.848			1.517	-0.112
		7.778	0.22			1.559	-21.695			1.039	-1.653			1.557	-0.13			1.45273	-2.747			1.557	-0.13
		7.787	0.239			1.599	-21.645			1.066	-1.675			1.597	-0.15			1.48998	-2.635			1.597	-0.15
		7.796	0.295			1.639	-21.849			1.092	-1.588			1.637	-0.164			1.52723	-2.975			1.637	-0.164
		7.805	0.36			1.679	-21.882			1.119	-1.563			1.677	-0.186			1.56447	-2.981			1.677	-0.186
		7.814	0.449			1.719	-21.593			1.146	-1.713			1.717	-0.216			1.60172	-2.985			1.717	-0.216
		7.823	0.579			1.759	-21.727			1.172	-1.713			1.757	-0.228			1.63897	-2.987			1.757	-0.228
		7.832	0.699			1.799	-21.738			1.199	-1.891			1.797	-0.244			1.67622	-2.905			1.797	-0.244
		7.841	0.742			1.839	-21.726			1.226	-1.753			1.836	-0.262			1.71347	-3.025			1.836	-0.262
		7.85	0.808			1.879	-21.737			1.252	-1.706			1.876	-0.285			1.75072	-2.965			1.876	-0.285
		7.859	0.925			1.919	-22.135			1.279	-1.83			1.916	-0.28			1.78797	-3.138			1.916	-0.28
		7.868	1.051			1.959	-21.9			1.306	-1.65			1.956	-0.306			1.82522	-2.867			1.956	-0.306
		7.877	1.131			1.999	-21.494			1.332	-1.61			1.996	-0.299			1.86247	-2.979			1.996	-0.299
		7.886	1.171			2.039	-21.36			1.359	-1.957			2.036	-0.324			1.89972	-3.083			2.036	-0.324
		7.895	1.167			2.079	-21.508			1.385	-1.982			2.076	-0.341			1.93697	-3.053			2.076	-0.341
		7.904	1.157			2.119	-21.618			1.412	-1.874			2.116	-0.339			1.97422	-2.744			2.116	-0.339
		7.913	1.155			2.159	-21.877			1.439	-1.916			2.156	-0.345			2.01147	-2.638			2.156	-0.345
		7.922	1.15			2.199	-21.628			1.465	-2.018			2.196	-0.351			2.04872	-2.738			2.196	-0.351
		7.931	1.18			2.239	-21.849			1.492	-2			2.236	-0.375			2.08597	-2.916			2.236	-0.375
		7.94	1.274			2.279	-22.103			1.519	-1.934			2.276	-0.384			2.12322	-2.756			2.276	-0.384
		7.949	1.414			2.319	-22.187			1.545	-2.011			2.316	-0.365			2.16047	-3.06			2.316	-0.365
		7.958	1.575			2.358	-22.193			1.572	-2.073			2.355	-0.38			2.19771	-3.328			2.355	-0.38
		7.967	1.68			2.398	-22.135			1.599	-2.048			2.395	-0.403			2.23496	-3.339			2.395	-0.403
		7.976	1.747			2.438	-22.203			1.625	-2.053			2.435	-0.417			2.27221	-3.194			2.435	-0.417
		7.985	1.782			2.478	-22.448			1.652	-1.969			2.475	-0.409			2.30946	-3.184			2.475	-0.409
		7.994	1.808			2.518	-22.411			1.679	-1.914			2.515	-0.43			2.34671	-3.159			2.515	-0.43
		8.003	1.879			2.558	-22.412			1.705	-1.869			2.555	-0.434			2.38396	-3.098			2.555	-0.434
		8.012	2.003			2.598	-22.408			1.732	-1.893			2.595	-0.437			2.42121	-3.275			2.595	-0.437
		8.021	2.066			2.638	-22.36			1.758	-1.812			2.635	-0.472			2.45846	-3.038			2.635	-0.472
		8.03	2.076			2.678	-22.359			1.785	-1.882			2.675	-0.47			2.49571	-3.277			2.675	-0.47
		8.039	2.064			2.718	-21.854			1.812	-1.827			2.715	-0.466			2.53296	-3.119			2.715	-0.466
		8.048	2			2.758	-22.686			1.838	-1.873			2.755	-0.475			2.57021	-2.96			2.755	-0.475
		8.057	2.036			2.798	-22.516			1.865	-1.937			2.795	-0.485			2.60746	-3.077			2.795	-0.485
		8.066	2.126			2.838	-22.41			1.892	-1.982			2.835	-0.496			2.64471	-2.877			2.835	-0.496
		8.075	2.23			2.878	-22.341			1.918	-2.227			2.874	-0.495			2.68196	-2.994			2.874	-0.495
		8.084	2.35			2.918	-22.471			1.945	-2.353			2.914	-0.501			2.71921	-2.924			2.914	-0.501
		8.093	2.465			2.958	-22.573			1.972	-2.454			2.954	-0.517			2.75646	-2.74			2.954	-0.517
		8.102	2.56			2.998	-22.444			1.998	-2.463			2.994	-0.522			2.7937	-2.533			2.994	-0.522
		8.111	2.708			3.038	-22.135			2.025	-2.525			3.034	-0.528			2.83095	-2.634			3.034	-0.528
		8.12	2.901			3.078	-22.274			2.052	-2.665			3.074	-0.533			2.8682	-2.69			3.074	-0.533
		8.129	3.036			3.118	-22.373			2.078	-2.603			3.114	-0.538			2.90545	-2.77			3.114	-0.538
		8.138	3.122			3.158	-22.403			2.105	-2.557			3.154	-0.534			2.9427	-2.487			3.154	-0.534
		8.147	3.25			3.198	-22.288			2.131	-2.559			3.194	-0.544			2.97995	-2.365			3.194	-0.544
		8.156	3.354			3.238	-22.477			2.158	-2.355			3.234	-0.553			3.0172	-2.594			3.234	-0.553
		8.165	3.467			3.278	-22.552			2.185	-2.585			3.274	-0.536			3.05445	-2.719			3.274	-0.536
		8.174	3.639			3.318	-22.771			2.211	-2.668			3.314	-0.551			3.0917	-2.787			3.314	-0.551
		8.183	3.839			3.358	-22.856			2.238	-2.538			3.354	-0.547			3.12895	-2.424			3.354	-0.547
		8.192	3.998			3.398	-22.696			2.265	-2.581			3.393	-0.543			3.1662	-2.318			3.393	-0.543
		8.201	4.133			3.438	-22.78			2.291	-2.85			3.433	-0.56			3.20345	-2.302			3.433	-0.56
		8.21	4.302			3.478	-23.043			2.318	-2.61			3.473	-0.551			3.2407	-2.262			3.473	-0.551
		8.219	4.385			3.518	-22.882			2.345	-2.795			3.513	-0.572			3.27795	-2.342			3.513	-0.572
		8.228	4.461			3.558	-22.919			2.371	-2.842			3.553	-0.558			3.3152	-2.293			3.553	-0.558
		8.237	4.546			3.598	-23.084			2.398	-2.722			3.593	-0.592			3.35245	-2.236			3.593	-0.592
		8.246	4.607			3.638	-23.136			2.425	-2.717			3.633	-0.596			3.3897	-2.255			3.633	-0.596
		8.255	4.665			3.678	-23.015			2.451	-2.748			3.673	-0.611			3.42694	-2.252			3.673	-0.611
		8.264	4.757			3.718	-22.932			2.478	-2.85			3.713	-0.614			3.46419	-2.117			3.713	-0.614
		8.273	4.907			3.758	-22.87			2.504	-2.797			3.753	-0.606			3.50144	-1.985			3.753	-0.606
		8.282	5.092			3.798	-23.064			2.531	-2.792			3.793	-0.633			3.53869	-1.886			3.793	-0.633
		8.291	5.226			3.838	-22.859			2.558	-2.746			3.833	-0.605			3.57594	-1.906			3.833	-0.605
		8.3	5.244			3.878	-22.872			2.584	-2.615			3.873	-0.618			3.61319	-1.807			3.873	-0.618
		8.309	5.324			3.917	-22.969			2.611	-2.639			3.912	-0.61			3.65044	-1.857			3.912	-0.61
		8.318	5.39			3.957	-23.029			2.638	-2.688			3.952	-0.638			3.68769	-1.823			3.952	-0.638
		8.327	5.434			3.997	-23.047			2.664	-2.183			3.992	-0.643			3.72494	-1.968			3.992	-0.643
		8.336	5.618			4.037	-22.827			2.691	-2.155			4.032	-0.636			3.76219	-2.082			4.032	-0.636
		8.345	5.767			4.077	-22.588			2.718	-2.224			4.072	-0.631			3.79944	-2.038			4.072	-0.631
		8.354	5.879			4.117	-22.558			2.744	-2.578			4.112	-0.649			3.83669	-2.151			4.112	-0.649
		8.363	6.077			4.157	-22.843			2.771	-2.766			4.152	-0.634			3.87394	-2.324			4.152	-0.634
		8.372	6.334			4.197	-22.918			2.798	-2.549			4.192	-0.622			3.91119	-2.14			4.192	-0.622
		8.381	6.523			4.237	-22.954			2.824	-2.658			4.232	-0.639			3.94844	-2.035			4.232	-0.639
		8.39	6.668			4.277	-23.149			2.851	-2.543			4.272	-0.651			3.98569	-2.247			4.272	-0.651
		8.399	6.75			4.317	-23.109			2.877	-2.543			4.312	-0.64			4.02293	-1.409			4.312	-0.64
		8.408	6.777			4.357	-23.317			2.904	-2.872			4.352	-0.658			4.06018	-2.254			4.352	-0.658
		8.417	6.78			4.397	-23.462			2.931	-2.722			4.392	-0.639			4.09743	-2.289			4.392	-0.639
		8.426	6.802			4.437	-23.45			2.957	-2.805			4.431	-0.625			4.13468	-2.243			4.431	-0.625
		8.435	6.83			4.477	-23.532			2.984	-2.82			4.471	-0.657			4.17193	-2.344			4.471	-0.657
		8.444	6.902			4.517	-23.49			3.011	-2.856			4.511	-0.64			4.20918	-2.221			4.511	-0.64
		8.453	7.06			4.557	-23.438			3.037	-3.072			4.551	-0.627			4.24643	-1.879			4.551	-0.627
		8.462	7.263			4.597	-23.551			3.064	-3.037			4.591	-0.637			4.28368	-2.095			4.591	-0.637
		8.471	7.429			4.637	-23.521			3.091	-2.904			4.631	-0.656			4.32093	-1.843			4.631	-0.656
		8.48	7.692			4.677	-23.5			3.117	-2.907			4.671	-0.651			4.35818	-2.096			4.671	-0.651
		8.489	7.895			4.717	-23.449			3.144	-2.977			4.711	-0.665			4.39543	-1.879			4.711	-0.665
		8.498	8.027			4.757	-23.507			3.171	-3.04			4.751	-0.672			4.43268	-1.636			4.751	-0.672
		8.507	8.139			4.797	-23.645			3.197	-3.15			4.791	-0.677			4.46993	-1.803			4.791	-0.677
		8.516	8.188			4.837	-23.718			3.224	-3.238			4.831	-0.704			4.50718	-1.774			4.831	-0.704
		8.525	8.24			4.877	-23.616			3.25	-3.083			4.871	-0.697			4.54443	-1.546			4.871	-0.697
		8.534	8.391			4.917	-23.407			3.277	-3.127			4.911	-0.691			4.58168	-1.55			4.911	-0.691
		8.543	8.656			4.957	-23.602			3.304	-3.12			4.95	-0.667			4.61893	-1.521			4.95	-0.667
		8.552	8.922			4.997	-23.753			3.33	-3.148			4.99	-0.69			4.65617	-1.709			4.99	-0.69
		8.561	9.061			5.037	-23.569			3.357	-3.135			5.03	-0.69			4.69342	-1.498			5.03	-0.69
		8.57	9.314			5.077	-23.289			3.384	-2.983			5.07	-0.713			4.73067	-1.48			5.07	-0.713
		8.579	9.476			5.117	-23.596			3.41	-2.975			5.11	-0.72			4.76792	-1.417			5.11	-0.72
		8.588	9.666			5.157	-23.309			3.437	-3.201			5.15	-0.708			4.80517	-1.539			5.15	-0.708
		8.597	9.933			5.197	-23.435			3.464	-3.324			5.19	-0.71			4.84242	-1.2			5.19	-0.71
		8.606	10.165			5.237	-23.366			3.49	-3.31			5.23	-0.712			4.87967	-1.225			5.23	-0.712
		8.615	10.348			5.277	-23.577			3.517	-3.175			5.27	-0.717			4.91692	-1.147			5.27	-0.717
		8.624	10.491			5.317	-23.655			3.544	-3.049			5.31	-0.711			4.95417	-1.095			5.31	-0.711
		8.633	10.616			5.357	-23.461			3.57	-3.362			5.35	-0.703			4.99142	-1.026			5.35	-0.703
		8.642	10.784			5.397	-23.597			3.597	-3.506			5.39	-0.687			5.02867	-0.804			5.39	-0.687
		8.651	10.986			5.437	-23.715			3.623	-3.377			5.43	-0.708			5.06592	-0.782			5.43	-0.708
		8.66	11.107			5.476	-23.84			3.65	-3.279			5.469	-0.696			5.10317	-0.591			5.469	-0.696
		8.669	11.373			5.516	-23.668			3.677	-3.205			5.509	-0.708			5.14042	-0.468			5.509	-0.708
		8.678	11.563			5.556	-24.019			3.703	-2.939			5.549	-0.704			5.17767	-0.781			5.549	-0.704
		8.687	11.711			5.596	-24.035			3.73	-2.981			5.589	-0.733			5.21492	-0.506			5.589	-0.733
		8.696	11.969			5.636	-23.875			3.757	-3.082			5.629	-0.72			5.25216	-0.051			5.629	-0.72
		8.705	12.228			5.676	-24.065			3.783	-3.078			5.669	-0.718			5.28941	-0.195			5.669	-0.718
		8.714	12.478			5.716	-23.92			3.81	-3.054			5.709	-0.731			5.32666	-0.112			5.709	-0.731
		8.723	12.804			5.756	-23.905			3.837	-3.182			5.749	-0.735			5.36391	-0.09			5.749	-0.735
		8.732	13.157			5.796	-24.028			3.863	-3.195			5.789	-0.729			5.40116	0.21			5.789	-0.729
		8.741	13.422			5.836	-23.905			3.89	-3.218			5.829	-0.741			5.43841	-0.016			5.829	-0.741
		8.75	13.67			5.876	-23.926			3.917	-3.163			5.869	-0.734			5.47566	0.113			5.869	-0.734
		8.759	13.812			5.916	-23.793			3.943	-2.927			5.909	-0.746			5.51291	0.372			5.909	-0.746
		8.768	13.98			5.956	-23.906			3.97	-3.264			5.949	-0.751			5.55016	0.146			5.949	-0.751
		8.777	14.144			5.996	-24.021			3.996	-3.32			5.988	-0.752			5.58741	0.357			5.988	-0.752
		8.786	14.38			6.036	-23.812			4.023	-3.334			6.028	-0.738			5.62466	0.537			6.028	-0.738
		8.795	14.668			6.076	-23.331			4.05	-3.584			6.068	-0.759			5.66191	0.706			6.068	-0.759
		8.804	14.961			6.116	-23.389			4.076	-3.383			6.108	-0.763			5.69916	0.557			6.108	-0.763
		8.813	15.294			6.156	-23.069			4.103	-3.553			6.148	-0.767			5.73641	0.677			6.148	-0.767
		8.822	15.678			6.196	-23.407			4.13	-3.61			6.188	-0.748			5.77366	0.813			6.188	-0.748
		8.831	15.912			6.236	-23.227			4.156	-3.5			6.228	-0.731			5.81091	0.953			6.228	-0.731
		8.84	16.116			6.276	-23.225			4.183	-3.521			6.268	-0.756			5.84816	1.333			6.268	-0.756
		8.849	16.336			6.316	-23.137			4.21	-3.542			6.308	-0.774			5.8854	1.421			6.308	-0.774
		8.858	16.497			6.356	-23.153			4.236	-3.595			6.348	-0.752			5.92265	1.664			6.348	-0.752
		8.867	16.728			6.396	-23.381			4.263	-3.478			6.388	-0.769			5.9599	1.641			6.388	-0.769
		8.876	17.025			6.436	-23.393			4.29	-3.581			6.428	-0.757			5.99715	1.749			6.428	-0.757
		8.885	17.327			6.476	-23.239			4.316	-3.631			6.468	-0.759			6.0344	1.806			6.468	-0.759
		8.894	17.633			6.516	-22.925			4.343	-3.455			6.507	-0.767			6.07165	1.939			6.507	-0.767
		8.903	17.962			6.556	-22.68			4.369	-3.59			6.547	-0.761			6.1089	1.918			6.547	-0.761
		8.912	18.253			6.596	-22.61			4.396	-3.732			6.587	-0.765			6.14615	2.2			6.587	-0.765
		8.921	18.453			6.636	-22.386			4.423	-3.596			6.627	-0.745			6.1834	2.454			6.627	-0.745
		8.93	18.69			6.676	-21.905			4.449	-3.501			6.667	-0.758			6.22065	2.78			6.667	-0.758
		8.939	19.028			6.716	-21.602			4.476	-3.704			6.707	-0.766			6.2579	2.977			6.707	-0.766
		8.948	19.364			6.756	-21.299			4.503	-3.772			6.747	-0.764			6.29515	3.226			6.747	-0.764
		8.957	19.75			6.796	-20.844			4.529	-3.427			6.787	-0.74			6.3324	2.956			6.787	-0.74
		8.966	20.2			6.836	-20.504			4.556	-3.546			6.827	-0.752			6.36965	3.458			6.827	-0.752
		8.975	20.601			6.876	-20.083			4.583	-3.767			6.867	-0.773			6.4069	3.981			6.867	-0.773
		8.984	20.923			6.916	-19.426			4.609	-3.688			6.907	-0.771			6.44415	4.009			6.907	-0.771
		8.993	21.242			6.956	-18.812			4.636	-3.607			6.947	-0.748			6.4814	4.548			6.947	-0.748
		9.002	21.603			6.996	-18.47			4.663	-3.613			6.987	-0.77			6.51864	4.859			6.987	-0.77
		9.011	21.983			7.035	-17.703			4.689	-3.704			7.026	-0.755			6.55589	5.416			7.026	-0.755
		9.02	22.351			7.075	-16.76			4.716	-3.484			7.066	-0.758			6.59314	5.825			7.066	-0.758
		9.029	22.832			7.115	-15.677			4.742	-3.309			7.106	-0.734			6.63039	6.405			7.106	-0.734
		9.038	23.285			7.155	-14.055			4.769	-3.341			7.146	-0.725			6.66764	6.684			7.146	-0.725
		9.047	23.647			7.195	-11.858			4.796	-3.234			7.186	-0.727			6.70489	7.108			7.186	-0.727
		9.056	24.051			7.235	-8.44			4.822	-3.3			7.226	-0.725			6.74214	7.648			7.226	-0.725
		9.065	24.467			7.275	-3.611			4.849	-3.325			7.266	-0.734			6.77939	8.189			7.266	-0.734
		9.074	24.816			7.315	2.827			4.876	-3.425			7.306	-0.696			6.81664	8.856			7.306	-0.696
		9.083	25.139			7.355	11.014			4.902	-3.392			7.346	-0.715			6.85389	9.766			7.346	-0.715
		9.092	25.544			7.395	20.076			4.929	-3.518			7.386	-0.693			6.89114	10.784			7.386	-0.693
		9.101	25.94			7.435	30.194			4.956	-3.475			7.426	-0.684			6.92839	11.686			7.426	-0.684
		9.11	26.312			7.475	40.075			4.982	-3.571			7.466	-0.69			6.96564	12.668			7.466	-0.69
		9.119	26.89			7.515	49.546			5.009	-3.751			7.506	-0.651			7.00289	14.077			7.506	-0.651
		9.128	27.456			7.555	58.892			5.036	-3.775			7.545	-0.642			7.04014	14.854			7.545	-0.642
		9.137	27.942			7.595	67.165			5.062	-3.636			7.585	-0.661			7.07739	16.093			7.585	-0.661
		9.146	28.434			7.635	74.591			5.089	-3.537			7.625	-0.615			7.11463	16.942			7.625	-0.615
		9.155	28.917			7.675	81.076			5.116	-3.861			7.665	-0.606			7.15188	17.685			7.665	-0.606
		9.164	29.331			7.715	87.242			5.142	-3.986			7.705	-0.587			7.18913	18.312			7.705	-0.587
		9.173	29.735			7.755	92.236			5.169	-3.934			7.745	-0.539			7.22638	18.761			7.745	-0.539
		9.182	30.26			7.795	96.869			5.195	-3.916			7.785	-0.457			7.26363	18.931			7.785	-0.457
		9.191	30.77			7.835	100.819			5.222	-3.938			7.825	-0.239			7.30088	19.133			7.825	-0.239
		9.2	31.189			7.875	104.698			5.249	-3.958			7.865	0.125			7.33813	19.426			7.865	0.125
		9.209	31.772			7.915	107.924			5.275	-3.848			7.905	0.705			7.37538	19.322			7.905	0.705
		9.218	32.301			7.955	111.478			5.302	-3.897			7.945	1.408			7.41263	19.264			7.945	1.408
		9.227	32.762			7.995	114.282			5.329	-3.814			7.985	2.124			7.44988	19.168			7.985	2.124
		9.236	33.321			8.035	116.812			5.355	-3.967			8.025	2.708			7.48713	19.679			8.025	2.708
		9.245	33.905			8.075	119.555			5.382	-3.763			8.064	3.125			7.52438	20.564			8.064	3.125
		9.254	34.453			8.115	122.478			5.409	-3.822			8.104	3.361			7.56163	21.415			8.104	3.361
		9.263	35.111			8.155	125.056			5.435	-3.902			8.144	3.483			7.59888	22.244			8.144	3.483
		9.272	35.98			8.195	127.656			5.462	-3.913			8.184	3.504			7.63613	23.542			8.184	3.504
		9.281	36.706			8.235	130.264			5.489	-4.032			8.224	3.508			7.67338	25.217			8.224	3.508
		9.29	37.349			8.275	132.941			5.515	-3.863			8.264	3.504			7.71063	27.139			8.264	3.504
		9.299	38.045			8.315	135.703			5.542	-3.771			8.304	3.522			7.74787	29.297			8.304	3.522
		9.308	38.513			8.355	138.387			5.568	-4.04			8.344	3.568			7.78512	31.197			8.344	3.568
		9.317	38.909			8.395	141.226			5.595	-4.086			8.384	3.673			7.82237	33.096			8.384	3.673
		9.326	39.469			8.435	143.313			5.622	-3.994			8.424	3.835			7.85962	34.098			8.424	3.835
		9.335	40.087			8.475	145.832			5.648	-4.109			8.464	4.052			7.89687	34.894			8.464	4.052
		9.344	40.681			8.515	148.822			5.675	-4.043			8.504	4.352			7.93412	35.146			8.504	4.352
		9.353	41.407			8.555	151.948			5.702	-3.9			8.544	4.789			7.97137	34.762			8.544	4.789
		9.362	42.338			8.594	154.522			5.728	-3.802			8.583	5.447			8.00862	33.651			8.583	5.447
		9.371	43.093			8.634	157.278			5.755	-3.456			8.623	6.337			8.04587	32.588			8.623	6.337
		9.38	43.774			8.674	160.068			5.782	-3.265			8.663	7.407			8.08312	31.312			8.663	7.407
		9.389	44.63			8.714	162.725			5.808	-3.585			8.703	8.572			8.12037	29.993			8.703	8.572
		9.398	45.434			8.754	165.69			5.835	-3.567			8.743	9.736			8.15762	28.743			8.743	9.736
		9.407	46.153			8.794	168.368			5.862	-3.508			8.783	10.906			8.19487	27.284			8.783	10.906
		9.416	47.034			8.834	171.169			5.888	-3.628			8.823	12.087			8.23212	26.2			8.823	12.087
		9.425	48.032			8.874	173.476			5.915	-3.605			8.863	13.286			8.26937	25.342			8.863	13.286
		9.434	48.927			8.914	176.066			5.941	-3.513			8.903	14.488			8.30662	24.477			8.903	14.488
		9.443	49.771			8.954	179.174			5.968	-3.755			8.943	15.715			8.34386	23.462			8.943	15.715
		9.452	50.862			8.994	182.003			5.995	-3.981			8.983	17.042			8.38111	23.088			8.983	17.042
		9.461	51.872			9.034	184.104			6.021	-3.986			9.023	18.404			8.41836	22.489			9.023	18.404
		9.47	52.594			9.074	187.208			6.048	-4.278			9.063	19.831			8.45561	22.127			9.063	19.831
		9.479	53.584			9.114	189.831			6.075	-4.247			9.103	21.326			8.49286	21.794			9.103	21.326
		9.488	54.51			9.154	193.105			6.101	-4.056			9.142	22.87			8.53011	22.077			9.142	22.87
		9.497	55.253			9.194	196.249			6.128	-3.981			9.182	24.498			8.56736	22.293			9.182	24.498
		9.506	56.247			9.234	198.354			6.155	-3.997			9.222	26.19			8.60461	22.221			9.222	26.19
		9.515	57.424			9.274	200.993			6.181	-3.997			9.262	27.869			8.64186	22.193			9.262	27.869
		9.524	58.515			9.314	203.813			6.208	-4.085			9.302	29.637			8.67911	22.456			9.302	29.637
		9.533	59.634			9.354	206.655			6.235	-4.124			9.342	31.411			8.71636	22.169			9.342	31.411
		9.542	61.073			9.394	209.192			6.261	-4.017			9.382	33.27			8.75361	22.512			9.382	33.27
		9.551	62.306			9.434	211.926			6.288	-4.053			9.422	35.156			8.79086	22.512			9.422	35.156
		9.56	63.253			9.474	214.386			6.314	-4.1			9.462	37.063			8.82811	22.974			9.462	37.063
		9.569	64.589			9.514	217.153			6.341	-3.994			9.502	39.05			8.86536	22.985			9.502	39.05
		9.578	65.703			9.554	220.104			6.368	-4.085			9.542	41.024			8.90261	23.501			9.542	41.024
		9.587	66.581			9.594	223.062			6.394	-4.009			9.582	43.079			8.93986	23.86			9.582	43.079
		9.596	67.783			9.634	226.091			6.421	-4.166			9.622	45.18			8.9771	24.162			9.622	45.18
		9.605	69.168			9.674	229.258			6.448	-4.268			9.661	47.322			9.01435	24.415			9.661	47.322
		9.614	70.43			9.714	232.693			6.474	-4.017			9.701	49.48			9.0516	25.176			9.701	49.48
		9.623	71.742			9.754	235.749			6.501	-3.943			9.741	51.727			9.08885	25.553			9.741	51.727
		9.632	73.349			9.794	239.429			6.528	-3.949			9.781	54.017			9.1261	26.014			9.781	54.017
		9.641	74.62			9.834	243.23			6.554	-3.854			9.821	56.379			9.16335	26.469			9.821	56.379
		9.649	75.588			9.874	246.983			6.581	-3.854			9.861	58.776			9.2006	27.209			9.861	58.776
		9.658	77.061			9.914	251.018			6.608	-3.91			9.901	61.272			9.23785	27.978			9.901	61.272
		9.667	78.378			9.954	254.916			6.634	-3.974			9.941	63.856			9.2751	28.602			9.941	63.856
		9.676	79.5			9.994	259.451			6.661	-3.911			9.981	66.488			9.31235	29.497			9.981	66.488
		9.685	81.02			10.034	264.073			6.687	-3.799			10.021	69.205			9.3496	30.08			10.021	69.205
		9.694	82.659			10.074	268.43			6.714	-3.774			10.061	72.024			9.38685	30.867			10.061	72.024
		9.703	84.024			10.114	272.871			6.741	-3.656			10.101	74.867			9.4241	31.738			10.101	74.867
		9.712	85.417			10.153	278.359			6.767	-3.427			10.141	77.824			9.46135	32.118			10.141	77.824
		9.721	87.229			10.193	283.762			6.794	-3.391			10.18	80.828			9.4986	32.856			10.18	80.828
		9.73	88.675			10.233	289.056			6.821	-3.47			10.22	83.92			9.53585	33.96			10.22	83.92
		9.739	89.918			10.273	294.914			6.847	-3.281			10.26	87.019			9.57309	34.708			10.26	87.019
		9.748	91.836			10.313	300.674			6.874	-3.323			10.3	90.167			9.61034	35.565			10.3	90.167
		9.757	93.409			10.353	306.9			6.901	-3.3			10.34	93.386			9.64759	36.57			10.34	93.386
		9.766	94.696			10.393	313.183			6.927	-3.308			10.38	96.579			9.68484	36.946			10.38	96.579
		9.775	96.36			10.433	320.527			6.954	-3.394			10.42	99.768			9.72209	38.278			10.42	99.768
		9.784	98.072			10.473	327.899			6.981	-3.508			10.46	102.957			9.75934	39.011			10.46	102.957
		9.793	99.434			10.513	334.722			7.007	-3.45			10.5	106.013			9.79659	39.957			10.5	106.013
		9.802	100.867			10.553	343.235			7.034	-3.411			10.54	109.103			9.83384	40.895			10.54	109.103
		9.811	102.821			10.593	352.376			7.06	-3.231			10.58	112.1			9.87109	41.82			10.58	112.1
		9.82	104.352			10.633	361.46			7.087	-2.894			10.62	114.983			9.90834	42.655			10.62	114.983
		9.829	105.735			10.673	371.46			7.114	-2.894			10.66	117.767			9.94559	43.535			10.66	117.767
		9.838	107.776			10.713	381.898			7.14	-2.927			10.699	120.443			9.98284	44.341			10.699	120.443
		9.847	109.333			10.753	391.695			7.167	-2.379			10.739	122.923			10.0201	45.513			10.739	122.923
		9.856	110.581			10.793	402.597			7.194	-1.721			10.779	125.326			10.0573	46.197			10.779	125.326
		9.865	112.27			10.833	412.576			7.22	-1.42			10.819	127.521			10.0946	47.204			10.819	127.521
		9.874	114.034			10.873	422.526			7.247	-0.857			10.859	129.556			10.1318	48.074			10.859	129.556
		9.883	115.466			10.913	432.686			7.274	-0.3			10.899	131.428			10.1691	49.266			10.899	131.428
		9.892	117.018			10.953	441.628			7.3	0.485			10.939	133.126			10.2063	50.278			10.939	133.126
		9.901	119.05			10.993	451.447			7.327	1.184			10.979	134.652			10.2436	50.979			10.979	134.652
		9.91	120.549			11.033	459.594			7.354	2.105			11.019	136.01			10.2808	51.818			11.019	136.01
		9.919	121.996			11.073	466.002			7.38	2.827			11.059	137.227			10.3181	52.601			11.059	137.227
		9.928	124.08			11.113	472.036			7.407	3.545			11.099	138.332			10.3553	53.651			11.099	138.332
		9.937	125.717			11.153	475.415			7.433	4.636			11.139	139.261			10.3926	54.367			11.139	139.261
		9.946	127.131			11.193	478.697			7.46	5.561			11.179	140.122			10.4298	55.391			11.179	140.122
		9.955	128.852			11.233	478.136			7.487	6.59			11.218	140.924			10.4671	56.41			11.218	140.924
		9.964	130.547			11.273	477.239			7.513	7.137			11.258	141.617			10.5043	57.7			11.258	141.617
		9.973	131.9			11.313	474.42			7.54	7.853			11.298	142.29			10.5416	58.874			11.298	142.29
		9.982	133.342			11.353	469.974			7.567	8.78			11.338	142.958			10.5788	60.086			11.338	142.958
		9.991	135.236			11.393	463.619			7.593	9.474			11.378	143.661			10.6161	61.971			11.378	143.661
		10	136.678			11.433	456.283			7.62	10.009			11.418	144.399			10.6533	63.672			11.418	144.399
		10.009	138.075			11.473	447.309			7.647	10.85			11.458	145.211			10.6906	65.714			11.458	145.211
		10.018	140.049			11.513	435.209			7.673	11.587			11.498	146.106			10.7278	67.93			11.498	146.106
		10.027	141.491			11.553	423.452			7.7	12.313			11.538	147.136			10.7651	70.415			11.538	147.136
		10.036	142.737			11.593	409.94			7.727	13.033			11.578	148.342			10.8023	73.543			11.578	148.342
		10.045	144.244			11.633	395.424			7.753	13.731			11.618	149.696			10.8396	77.236			11.618	149.696
		10.054	145.693			11.673	380.088			7.78	14.734			11.658	151.232			10.8768	80.972			11.658	151.232
		10.063	146.865			11.713	364.937			7.806	15.414			11.698	152.985			10.9141	85.334			11.698	152.985
		10.072	148.21			11.752	348.451			7.833	15.754			11.737	154.97			10.9513	90.366			11.737	154.97
		10.081	149.97			11.792	332.407			7.86	16.104			11.777	157.177			10.9886	95.985			11.777	157.177
		10.09	151.277			11.832	315.866			7.886	16.594			11.817	159.636			11.0258	101.856			11.817	159.636
		10.099	152.57			11.872	299.083			7.913	17.369			11.857	162.281			11.0631	107.758			11.857	162.281
		10.108	154.353			11.912	282.591			7.94	18.049			11.897	165.131			11.1003	114.124			11.897	165.131
		10.117	155.642			11.952	265.727			7.966	18.612			11.937	168.255			11.1376	121.26			11.937	168.255
		10.126	156.808			11.992	250.001			7.993	18.945			11.977	171.504			11.1748	127.916			11.977	171.504
		10.135	158.222			12.032	234.526			8.02	19.639			12.017	174.869			11.2121	134.659			12.017	174.869
		10.144	159.523			12.072	219.407			8.046	20.484			12.057	178.321			11.2493	141.208			12.057	178.321
		10.153	160.5			12.112	205.103			8.073	20.641			12.097	181.842			11.2866	147.213			12.097	181.842
		10.162	161.552			12.152	190.571			8.1	20.909			12.137	185.329			11.3238	152.509			12.137	185.329
		10.171	162.815			12.192	177.236			8.126	21.408			12.177	188.749			11.3611	156.714			12.177	188.749
		10.18	163.716			12.232	164.722			8.153	21.987			12.217	191.971			11.3983	160.261			12.217	191.971
		10.189	164.741			12.272	152.225			8.179	22.726			12.256	195.045			11.4356	162.622			12.256	195.045
		10.198	166.196			12.312	140.389			8.206	23.225			12.296	197.824			11.4728	163.726			12.296	197.824
		10.207	167.271			12.352	129.257			8.233	23.738			12.336	200.223			11.5101	163.654			12.336	200.223
		10.216	168.232			12.392	118.339			8.259	24.468			12.376	202.188			11.5473	161.861			12.376	202.188
		10.225	169.247			12.432	108.772			8.286	25.091			12.416	203.688			11.5846	159.642			12.416	203.688
		10.234	170.11			12.472	98.862			8.313	25.657			12.456	204.639			11.6218	155.558			12.456	204.639
		10.243	170.806			12.512	89.806			8.339	26.319			12.496	204.97			11.6591	150.983			12.496	204.97
		10.252	171.681			12.552	81.626			8.366	26.916			12.536	204.635			11.6963	145.442			12.536	204.635
		10.261	172.788			12.592	73.37			8.393	27.595			12.576	203.674			11.7336	139.008			12.576	203.674
		10.27	173.661			12.632	65.89			8.419	28.286			12.616	202.043			11.7708	132.244			12.616	202.043
		10.279	174.512			12.672	58.468			8.446	28.892			12.656	199.75			11.8081	125.083			12.656	199.75
		10.288	175.572			12.712	52.041			8.473	29.698			12.696	196.784			11.8453	117.623			12.696	196.784
		10.297	176.346			12.752	45.902			8.499	30.34			12.736	193.276			11.8826	110.112			12.736	193.276
		10.306	177.134			12.792	40.173			8.526	31.105			12.775	189.222			11.9198	102.882			12.775	189.222
		10.315	178.059			12.832	34.736			8.552	32.038			12.815	184.697			11.9571	96.099			12.815	184.697
		10.324	178.859			12.872	29.757			8.579	32.898			12.855	179.776			11.9943	89.84			12.855	179.776
		10.333	179.48			12.912	25.075			8.606	33.738			12.895	174.618			12.0316	83.531			12.895	174.618
		10.342	180.207			12.952	20.893			8.632	34.522			12.935	169.226			12.0688	78.257			12.935	169.226
		10.351	181.001			12.992	16.975			8.659	35.15			12.975	163.709			12.1061	72.988			12.975	163.709
		10.36	181.613			13.032	13.379			8.686	35.629			13.015	158.162			12.1433	68.553			13.015	158.162
		10.369	182.223			13.072	9.88			8.712	36.266			13.055	152.579			12.1806	64.317			13.055	152.579
		10.378	182.969			13.112	6.918			8.739	37.091			13.095	147.022			12.2178	61.171			13.095	147.022
		10.387	183.547			13.152	3.871			8.766	37.957			13.135	141.616			12.2551	57.907			13.135	141.616
		10.396	184.189			13.192	1.154			8.792	38.608			13.175	136.29			12.2923	55.383			13.175	136.29
		10.405	184.923			13.232	-1.078			8.819	39.738			13.215	131.079			12.3296	52.902			13.215	131.079
		10.414	185.484			13.272	-3.042			8.846	41.22			13.255	125.993			12.3668	51.135			13.255	125.993
		10.423	185.797			13.311	-5.27			8.872	41.966			13.294	121.068			12.404	49.339			13.294	121.068
		10.432	186.09			13.351	-6.923			8.899	42.53			13.334	116.232			12.4413	48.001			13.334	116.232
		10.441	186.371			13.391	-8.544			8.925	43.381			13.374	111.513			12.4785	46.731			13.374	111.513
		10.45	186.69			13.431	-9.836			8.952	44.224			13.414	106.94			12.5158	45.283			13.414	106.94
		10.459	187.197			13.471	-11.413			8.979	45.165			13.454	102.443			12.553	44.406			13.454	102.443
		10.468	187.822			13.511	-12.585			9.005	45.893			13.494	98.051			12.5903	43.039			13.494	98.051
		10.477	188.276			13.551	-13.863			9.032	46.614			13.534	93.744			12.6275	42.045			13.534	93.744
		10.486	188.83			13.591	-14.888			9.059	47.475			13.574	89.577			12.6648	40.622			13.574	89.577
		10.495	189.43			13.631	-15.746			9.085	48.251			13.614	85.527			12.702	39.427			13.614	85.527
		10.504	189.928			13.671	-16.464			9.112	48.704			13.654	81.611			12.7393	38.284			13.654	81.611
		10.513	190.305			13.711	-17.146			9.139	49.346			13.694	77.794			12.7765	36.786			13.694	77.794
		10.522	190.62			13.751	-17.959			9.165	50.087			13.734	74.179			12.8138	35.518			13.734	74.179
		10.531	190.858			13.791	-18.391			9.192	50.885			13.774	70.664			12.851	33.82			13.774	70.664
		10.54	191.102			13.831	-18.807			9.219	51.852			13.813	67.351			12.8883	31.544			13.813	67.351
		10.549	191.422			13.871	-19.345			9.245	52.845			13.853	64.194			12.9255	29.916			13.853	64.194
		10.558	191.8			13.911	-19.104			9.272	53.653			13.893	61.253			12.9628	28.031			13.893	61.253
		10.567	191.997			13.951	-20			9.298	54.328			13.933	58.485			13	25.808			13.933	58.485
		10.576	192.187			13.991	-20.588			9.325	55.252			13.973	55.908			13.0373	24.179			13.973	55.908
		10.585	192.443			14.031	-20.809			9.352	55.785			14.013	53.544			13.0745	22.204			14.013	53.544
		10.594	192.724			14.071	-20.793			9.378	56.654			14.053	51.317			13.1118	20.462			14.053	51.317
		10.603	192.961			14.111	-20.963			9.405	57.453			14.093	49.317			13.149	18.596			14.093	49.317
		10.612	193.14			14.151	-21.434			9.432	57.874			14.133	47.45			13.1863	17.032			14.133	47.45
		10.621	193.32			14.191	-21.638			9.458	58.457			14.173	45.771			13.2235	15.208			14.173	45.771
		10.63	193.396			14.231	-21.629			9.485	58.956			14.213	44.256			13.2608	13.913			14.213	44.256
		10.639	193.555			14.271	-21.414			9.512	59.801			14.253	42.867			13.298	12.538			14.253	42.867
		10.648	193.904			14.311	-21.654			9.538	60.601			14.293	41.615			13.3353	10.91			14.293	41.615
		10.657	194.16			14.351	-21.872			9.565	61.231			14.332	40.495			13.3725	9.966			14.332	40.495
		10.666	194.403			14.391	-21.717			9.592	62.018			14.372	39.501			13.4098	8.909			14.372	39.501
		10.675	194.583			14.431	-21.746			9.618	62.59			14.412	38.628			13.447	8.213			14.412	38.628
		10.684	194.625			14.471	-21.876			9.645	63.371			14.452	37.826			13.4843	7.273			14.452	37.826
		10.693	194.59			14.511	-22.231			9.672	64.017			14.492	37.096			13.5215	6.523			14.492	37.096
		10.702	194.614			14.551	-22.172			9.698	64.774			14.532	36.472			13.5588	5.883			14.532	36.472
		10.711	194.699			14.591	-22.669			9.725	65.298			14.572	35.92			13.596	5.109			14.572	35.92
		10.72	194.944			14.631	-22.847			9.751	66.008			14.612	35.404			13.6333	4.432			14.612	35.404
		10.729	195.217			14.671	-22.581			9.778	66.595			14.652	34.965			13.6705	3.916			14.652	34.965
		10.738	195.481			14.711	-22.715			9.805	67.41			14.692	34.582			13.7078	3.285			14.692	34.582
		10.747	195.616			14.751	-22.685			9.831	68.455			14.732	34.2			13.745	2.742			14.732	34.2
		10.756	195.657			14.791	-22.766			9.858	69.157			14.772	33.917			13.7823	2.3			14.772	33.917
		10.765	195.661			14.831	-22.559			9.885	69.643			14.812	33.6			13.8195	1.936			14.812	33.6
		10.774	195.632			14.87	-22.753			9.911	70.331			14.851	33.354			13.8568	1.692			14.851	33.354
		10.783	195.576			14.91	-22.809			9.938	70.95			14.891	33.142			13.894	1.421			14.891	33.142
		10.792	195.524			14.95	-22.67			9.965	71.497			14.931	32.936			13.9313	1.174			14.931	32.936
		10.801	195.466			14.99	-22.728			9.991	71.98			14.971	32.733			13.9685	0.99			14.971	32.733
		10.81	195.414			15.03	-23.079			10.018	72.795			15.011	32.591			14.0058	0.683			15.011	32.591
		10.819	195.53			15.07	-23.005			10.045	73.434			15.051	32.439			14.043	0.669			15.051	32.439
		10.828	195.663			15.11	-22.896			10.071	73.911			15.091	32.284			14.0803	0.328			15.091	32.284
		10.837	195.793			15.15	-22.814			10.098	74.874			15.131	32.16			14.1175	0.092			15.131	32.16
		10.846	195.828			15.19	-22.804			10.124	75.634			15.171	32.017			14.1548	0.312			15.171	32.017
		10.855	195.679			15.23	-22.981			10.151	76.054			15.211	31.954			14.192	0.104			15.211	31.954
		10.864	195.459			15.27	-22.953			10.178	76.528			15.251	31.84			14.2293	-0.071			15.251	31.84
		10.873	195.313			15.31	-22.765			10.204	76.926			15.291	31.728			14.2665	-0.055			15.291	31.728
		10.882	195.261			15.35	-22.862			10.231	77.612			15.331	31.63			14.3038	-0.082			15.331	31.63
		10.891	195.377			15.39	-22.55			10.258	78.35			15.37	31.561			14.341	-0.066			15.37	31.561
		10.9	195.467			15.43	-22.685			10.284	79.378			15.41	31.487			14.3783	-0.235			15.41	31.487
		10.909	195.558			15.47	-22.934			10.311	80.12			15.45	31.397			14.4155	-0.476			15.45	31.397
		10.918	195.469			15.51	-22.719			10.338	81.057			15.49	31.334			14.4528	-0.474			15.49	31.334
		10.927	195.239			15.55	-22.872			10.364	82.029			15.53	31.254			14.49	-0.588			15.53	31.254
		10.936	194.989			15.59	-23.088			10.391	82.846			15.57	31.2			14.5273	-0.901			15.57	31.2
		10.945	194.689			15.63	-23.165			10.418	83.802			15.61	31.165			14.5645	-0.831			15.61	31.165
		10.954	194.435			15.67	-23.179			10.444	84.962			15.65	31.125			14.6018	-0.85			15.65	31.125
		10.963	194.301			15.71	-23.372			10.471	86.431			15.69	31.082			14.639	-0.636			15.69	31.082
		10.972	194.112			15.75	-23.441			10.497	88.134			15.73	31.029			14.6763	-0.59			15.73	31.029
		10.981	193.742			15.79	-23.29			10.524	90.043			15.77	31.003			14.7135	-0.493			15.77	31.003
		10.99	193.361			15.83	-23.619			10.551	91.466			15.81	30.955			14.7508	-0.594			15.81	30.955
		10.999	193.057			15.87	-23.537			10.577	93.176			15.85	30.932			14.788	-0.548			15.85	30.932
		11.008	192.662			15.91	-23.451			10.604	95.024			15.889	30.89			14.8253	-0.162			15.889	30.89
		11.017	192.209			15.95	-23.18			10.631	97.057			15.929	30.876			14.8625	-0.363			15.929	30.876
		11.026	191.814			15.99	-23.505			10.657	99.613			15.969	30.858			14.8998	-0.306			15.969	30.858
		11.035	191.291			16.03	-23.806			10.684	102.035			16.009	30.846			14.937	-0.39			16.009	30.846
		11.044	190.723			16.07	-23.605			10.711	104.685			16.049	30.827			14.9743	-0.043			16.049	30.827
		11.053	190.314			16.11	-23.486			10.737	107.46			16.089	30.813			15.0115	-0.02			16.089	30.813
		11.062	189.905			16.15	-23.423			10.764	110.22			16.129	30.805			15.0488	0.246			16.129	30.805
		11.071	189.272			16.19	-23.735			10.791	113.39			16.169	30.807			15.086	0.479			16.169	30.807
		11.08	188.746			16.23	-23.804			10.817	115.875			16.209	30.803			15.1233	0.631			16.209	30.803
		11.089	188.18			16.27	-23.863			10.844	119.318			16.249	30.81			15.1605	0.868			16.249	30.81
		11.098	187.486			16.31	-23.588			10.87	123.122			16.289	30.787			15.1978	0.738			16.289	30.787
		11.107	186.937			16.35	-23.461			10.897	126.053			16.329	30.791			15.235	0.867			16.329	30.791
		11.116	186.464			16.39	-23.402			10.924	128.869			16.369	30.788			15.2723	0.736			16.369	30.788
		11.125	185.944			16.429	-23.726			10.95	131.66			16.408	30.794			15.3095	0.601			16.408	30.794
		11.134	185.346			16.469	-23.607			10.977	134.925			16.448	30.805			15.3468	0.515			16.448	30.805
		11.143	184.646			16.509	-23.518			11.004	138.122			16.488	30.805			15.384	0.431			16.488	30.805
		11.152	183.717			16.549	-23.655			11.03	140.887			16.528	30.784			15.4213	0.281			16.528	30.784
		11.161	182.489			16.589	-23.762			11.057	143.493			16.568	30.788			15.4585	0.307			16.568	30.788
		11.17	181.554			16.629	-23.91			11.084	145.915			16.608	30.795			15.4957	0.32			16.608	30.795
		11.179	180.618			16.669	-24.081			11.11	147.954			16.648	30.797			15.533	0.308			16.648	30.797
		11.188	179.619			16.709	-24.257			11.137	150.174			16.688	30.823			15.5702	0.21			16.688	30.823
		11.197	178.818			16.749	-24.516			11.164	151.695			16.728	30.836			15.6075	-0.018			16.728	30.836
		11.206	178.071			16.789	-24.12			11.19	152.656			16.768	30.808			15.6447	0.075			16.768	30.808
		11.215	177.237			16.829	-24.166			11.217	154.013			16.808	30.827			15.682	-0.174			16.808	30.827
		11.224	176.347			16.869	-24.357			11.243	154.806			16.848	30.824			15.7192	-0.425			16.848	30.824
		11.233	175.458			16.909	-24.389			11.27	155.375			16.888	30.821			15.7565	-0.467			16.888	30.821
		11.242	174.473			16.949	-24.324			11.297	155.979			16.927	30.827			15.7937	-0.718			16.927	30.827
		11.251	173.282			16.989	-24.386			11.323	156.01			16.967	30.839			15.831	-0.748			16.967	30.839
		11.26	172.302			17.029	-24.424			11.35	155.31			17.007	30.834			15.8682	-0.723			17.007	30.834
		11.269	171.385			17.069	-24.556			11.377	154.426			17.047	30.837			15.9055	-0.811			17.047	30.837
		11.278	170.248			17.109	-24.345			11.403	153.347			17.087	30.864			15.9427	-0.995			17.087	30.864
		11.287	169.251			17.149	-24.414			11.43	151.996			17.127	30.87			15.98	-1.273			17.127	30.87
		11.296	168.286			17.189	-24.309			11.457	150.193			17.167	30.912			16.0172	-1.495			17.167	30.912
		11.305	167.151			17.229	-24.471			11.483	148.05			17.207	30.893			16.0545	-1.368			17.207	30.893
		11.314	166.013			17.269	-24.716			11.51	145.983			17.247	30.882			16.0917	-1.487			17.247	30.882
		11.323	165.029			17.309	-24.565			11.537	143.641			17.287	30.919			16.129	-1.792			17.287	30.919
		11.332	163.908			17.349	-24.105			11.563	141.033			17.327	30.927			16.1662	-1.812			17.327	30.927
		11.341	162.573			17.389	-24.188			11.59	138.392			17.367	30.953			16.2035	-2.077			17.367	30.953
		11.35	161.491			17.429	-24.328			11.616	134.89			17.407	30.966			16.2407	-1.854			17.407	30.966
		11.359	160.31			17.469	-24.49			11.643	131.42			17.446	30.986			16.278	-1.886			17.446	30.986
		11.368	158.974			17.509	-24.283			11.67	128.127			17.486	31			16.3152	-1.897			17.486	31
		11.377	157.802			17.549	-24.329			11.696	124.366			17.526	30.998			16.3525	-2.177			17.526	30.998
		11.386	156.696			17.589	-24.288			11.723	120.789			17.566	30.999			16.3897	-2.088			17.566	30.999
		11.395	155.447			17.629	-24.479			11.75	116.922			17.606	31.017			16.427	-2.288			17.606	31.017
		11.404	154.138			17.669	-24.561			11.776	112.843			17.646	31.052			16.4642	-2.184			17.646	31.052
		11.413	152.939			17.709	-24.436			11.803	108.891			17.686	31.068			16.5015	-2.147			17.686	31.068
		11.422	151.676			17.749	-24.721			11.83	104.881			17.726	31.072			16.5387	-2.088			17.726	31.072
		11.431	150.097			17.789	-24.837			11.856	101.229			17.766	31.088			16.576	-2.034			17.766	31.088
		11.44	148.838			17.829	-24.772			11.883	97.412			17.806	31.104			16.6132	-1.949			17.806	31.104
		11.449	147.697			17.869	-24.706			11.91	93.368			17.846	31.124			16.6505	-2.21			17.846	31.124
		11.458	146.234			17.909	-24.792			11.936	89.228			17.886	31.156			16.6877	-2.208			17.886	31.156
		11.467	144.855			17.949	-24.86			11.963	85.3			17.926	31.148			16.725	-2.029			17.926	31.148
		11.476	143.554			17.988	-24.856			11.989	81.279			17.965	31.153			16.7622	-1.805			17.965	31.153
		11.485	142.095			18.028	-24.662			12.016	77.461			18.005	31.165			16.7995	-1.819			18.005	31.165
		11.494	140.629			18.068	-25.026			12.043	73.389			18.045	31.173			16.8367	-1.999			18.045	31.173
		11.503	139.439			18.108	-24.84			12.069	69.454			18.085	31.186			16.874	-2.035			18.085	31.186
		11.512	138.266			18.148	-24.735			12.096	65.859			18.125	31.187			16.9112	-1.91			18.125	31.187
		11.521	136.681			18.188	-24.873			12.123	62.325			18.165	31.219			16.9485	-2.169			18.165	31.219
		11.53	135.244			18.228	-25.032			12.149	58.981			18.205	31.234			16.9857	-2.26			18.205	31.234
		11.539	133.885			18.268	-25.067			12.176	55.326			18.245	31.233			17.023	-2.277			18.245	31.233
		11.548	132.218			18.308	-24.95			12.203	51.876			18.285	31.252			17.0602	-2.29			18.285	31.252
		11.557	130.712			18.348	-24.862			12.229	48.922			18.325	31.254			17.0975	-2.363			18.325	31.254
		11.566	129.462			18.388	-24.923			12.256	45.773			18.365	31.248			17.1347	-2.504			18.365	31.248
		11.575	128.197			18.428	-24.889			12.283	42.873			18.405	31.288			17.172	-2.459			18.405	31.288
		11.584	126.868			18.468	-24.745			12.309	40.429			18.445	31.299			17.2092	-2.554			18.445	31.299
		11.593	125.679			18.508	-24.879			12.336	38.036			18.484	31.339			17.2465	-2.456			18.484	31.339
		11.602	124.548			18.548	-25.064			12.362	35.498			18.524	31.341			17.2837	-2.607			18.524	31.341
		11.611	122.97			18.588	-25.248			12.389	33.12			18.564	31.389			17.321	-2.644			18.564	31.389
		11.62	121.561			18.628	-25.21			12.416	31.148			18.604	31.427			17.3582	-2.611			18.604	31.427
		11.629	120.365			18.668	-25.628			12.442	28.989			18.644	31.469			17.3955	-2.452			18.644	31.469
		11.638	118.856			18.708	-25.452			12.469	27.104			18.684	31.509			17.4327	-2.78			18.684	31.509
		11.647	117.426			18.748	-25.546			12.496	25.62			18.724	31.576			17.47	-2.625			18.724	31.576
		11.656	116.163			18.788	-25.477			12.522	23.783			18.764	31.652			17.5072	-2.563			18.764	31.652
		11.665	114.761			18.828	-25.355			12.549	22.151			18.804	31.739			17.5445	-2.329			18.804	31.739
		11.674	113.254			18.868	-25.25			12.576	20.986			18.844	31.829			17.5817	-2.525			18.844	31.829
		11.683	111.954			18.908	-25.067			12.602	19.664			18.884	31.929			17.619	-2.377			18.884	31.929
		11.692	110.724			18.948	-24.676			12.629	18.014			18.924	32.045			17.6562	-2.742			18.924	32.045
		11.701	109.093			18.988	-24.453			12.656	16.914			18.964	32.191			17.6935	-2.822			18.964	32.191
		11.71	107.765			19.028	-24.047			12.682	15.871			19.003	32.307			17.7307	-2.679			19.003	32.307
		11.719	106.622			19.068	-23.282			12.709	15.021			19.043	32.457			17.768	-2.859			19.043	32.457
		11.728	105.088			19.108	-22.802			12.735	14.046			19.083	32.612			17.8052	-3.064			19.083	32.612
		11.737	103.696			19.148	-22.007			12.762	13.049			19.123	32.723			17.8425	-3.059			19.123	32.723
		11.746	102.508			19.188	-20.984			12.789	12.301			19.163	32.831			17.8797	-2.913			19.163	32.831
		11.755	101.174			19.228	-20.148			12.815	11.698			19.203	32.861			17.917	-3.057			19.203	32.861
		11.764	99.717			19.268	-19.388			12.842	10.996			19.243	32.761			17.9542	-3.052			19.243	32.761
		11.773	98.484			19.308	-18.431			12.869	10.31			19.283	32.621			17.9915	-3.182			19.283	32.621
		11.782	97.391			19.348	-17.659			12.895	9.797			19.323	32.41			18.0287	-2.964			19.323	32.41
		11.79	96.043			19.388	-16.845			12.922	9.473			19.363	32.145			18.066	-3.121			19.363	32.145
		11.799	94.84			19.428	-16.219			12.949	8.742			19.403	31.959			18.1032	-3.195			19.403	31.959
		11.808	93.956			19.468	-15.932			12.975	8.219			19.443	31.904			18.1405	-3.157			19.443	31.904
		11.817	92.719			19.508	-15.5			13.002	7.852			19.483	31.975			18.1777	-2.983			19.483	31.975
		11.826	91.454			19.547	-15.851			13.029	7.225			19.522	32.305			18.215	-2.938			19.522	32.305
		11.835	90.389			19.587	-16.565			13.055	6.682			19.562	32.897			18.2522	-2.855			19.562	32.897
		11.844	89.13			19.627	-17.03			13.082	6.29			19.602	33.835			18.2895	-2.93			19.602	33.835
		11.853	87.695			19.667	-18.012			13.108	5.755			19.642	35.078			18.3267	-2.761			19.642	35.078
		11.862	86.558			19.707	-19.246			13.135	5.327			19.682	36.592			18.364	-2.734			19.682	36.592
		11.871	85.548			19.747	-20.478			13.162	4.963			19.722	38.23			18.4012	-2.794			19.722	38.23
		11.88	84.058			19.787	-21.667			13.188	4.465			19.762	39.885			18.4385	-2.942			19.762	39.885
		11.889	82.989			19.827	-22.801			13.215	3.86			19.802	41.353			18.4757	-2.773			19.802	41.353
		11.898	82.039			19.867	-23.786			13.242	3.272			19.842	42.429			18.513	-2.725			19.842	42.429
		11.907	80.7			19.907	-24.811			13.268	2.994			19.882	42.915			18.5502	-2.985			19.882	42.915
		11.916	79.627			19.947	-25.124			13.295	2.788			19.922	42.688			18.5874	-2.894			19.922	42.688
		11.925	78.768			19.987	-25.244			13.322	2.429			19.962	41.606			18.6247	-2.876			19.962	41.606
		11.934	77.741			20.027	-25.223			13.348	1.976			20.002	39.674			18.6619	-2.919			20.002	39.674
		11.943	76.63			20.067	-24.788			13.375	1.707			20.041	37.104			18.6992	-2.973			20.041	37.104
		11.952	75.775			20.107	-24.155			13.402	1.447			20.081	34.174			18.7364	-3.029			20.081	34.174
		11.961	74.928			20.147	-23.41			13.428	1.289			20.121	31.304			18.7737	-2.915			20.121	31.304
		11.97	73.687			20.187	-22.331			13.455	0.971			20.161	29.112			18.8109	-3.16			20.161	29.112
		11.979	72.679			20.227	-21.351			13.481	0.699			20.201	27.859			18.8482	-3.047			20.201	27.859
		11.988	71.784			20.267	-20.127			13.508	0.502			20.241	27.246			18.8854	-3.005			20.241	27.246
		11.997	70.576			20.307	-19.749			13.535	0.24			20.281	26.372			18.9227	-2.773			20.281	26.372
		12.006	69.472			20.347	-19.131			13.561	0.101			20.321	24.458			18.9599	-2.923			20.321	24.458
		12.015	68.56			20.387	-18.93			13.588	-0.211			20.361	21.758			18.9972	-2.698			20.361	21.758
		12.024	67.561			20.427	-18.762			13.615	-0.569			20.401	19.353			19.0344	-2.508			20.401	19.353
		12.033	66.492			20.467	-19.575			13.641	-0.884			20.441	18.325			19.0717	-2.565			20.441	18.325
		12.042	65.666			20.507	-20.598			13.668	-1.233			20.481	19.69			19.1089	-2.857			20.481	19.69
		12.051	64.984			20.547	-21.789			13.695	-1.168			20.521	24.6			19.1462	-2.56			20.521	24.6
		12.06	63.998			20.587	-23.601			13.721	-1.372			20.56	34.443			19.1834	-2.309			20.56	34.443
		12.069	63.133			20.627	-25.695			13.748	-1.478			20.6	49.814			19.2207	-2.577			20.6	49.814
		12.078	62.345			20.667	-27.793			13.775	-1.391			20.64	69.599			19.2579	-2.628			20.64	69.599
		12.087	61.155			20.707	-30.055			13.801	-1.651			20.68	90.765			19.2952	-2.806			20.68	90.765
		12.096	60.085			20.747	-32.222			13.828	-1.969			20.72	112.298			19.3324	-3.083			20.72	112.298
		12.105	59.232			20.787	-34.099			13.854	-2.094			20.76	133.554			19.3697	-3.917			20.76	133.554
		12.114	58.371			20.827	-35.496			13.881	-2.155			20.8	150.012			19.4069	-3.826			20.8	150.012
		12.123	57.52			20.867	-36.855			13.908	-1.898			20.84	158.125			19.4442	-4.643			20.84	158.125
		12.132	56.9			20.907	-37.734			13.934	-1.869			20.88	161.186			19.4814	-5.462			20.88	161.186
		12.141	56.338			20.947	-38.38			13.961	-2.161			20.92	161.971			19.5187	-5.978			20.92	161.971
		12.15	55.435			20.987	-38.64			13.988	-2.278			20.96	161.287			19.5559	-6.281			20.96	161.287
		12.159	54.637			21.027	-38.695			14.014	-2.318			21	157.439			19.5932	-6.608			21	157.439
		12.168	53.922			21.067	-38.19			14.041	-2.511			21.04	150.851			19.6304	-6.527			21.04	150.851
		12.177	52.947			21.106	-37.688			14.068	-2.522			21.079	141.815			19.6677	-6.213			21.079	141.815
		12.186	52.104			21.146	-36.94			14.094	-2.547			21.119	129.543			19.7049	-5.768			21.119	129.543
		12.195	51.42			21.186	-35.949			14.121	-2.603			21.159	113.421			19.7422	-5.266			21.159	113.421
		12.204	50.67			21.226	-34.975			14.148	-2.646			21.199	98.12			19.7794	-4.53			21.199	98.12
		12.213	49.855			21.266	-33.741			14.174	-2.726			21.239	90.005			19.8167	-3.898			21.239	90.005
		12.222	49.173			21.306	-32.793			14.201	-2.922			21.279	90.233			19.8539	-3.297			21.279	90.233
		12.231	48.51			21.346	-31.949			14.227	-3.126			21.319	96.399			19.8912	-2.699			21.319	96.399
		12.24	47.566			21.386	-30.848			14.254	-3.027			21.359	102.207			19.9284	-2.469			21.359	102.207
		12.249	46.867			21.426	-29.873			14.281	-3.096			21.399	96.622			19.9657	-1.998			21.399	96.622
		12.258	46.304			21.466	-28.836			14.307	-3.442			21.439	82.325			20.0029	-1.582			21.439	82.325
		12.267	45.603			21.506	-28.24			14.334	-3.414			21.479	62.705			20.0402	-1.507			21.479	62.705
		12.276	45.021			21.546	-27.775			14.361	-3.323			21.519	42.86			20.0774	-1.379			21.519	42.86
		12.285	44.51			21.586	-27.071			14.387	-3.375			21.559	22.898			20.1147	-1.453			21.559	22.898
		12.294	43.902			21.626	-26.63			14.414	-3.34			21.598	5.508			20.1519	-1.435			21.598	5.508
		12.303	43.232			21.666	-26.399			14.441	-3.263			21.638	-7.535			20.1892	-1.433			21.638	-7.535
		12.312	42.66			21.706	-26.165			14.467	-3.491			21.678	-17.419			20.2264	-1.54			21.678	-17.419
		12.321	42.086			21.746	-26.096			14.494	-3.416			21.718	-21.26			20.2637	-2.031			21.718	-21.26
		12.33	41.368			21.786	-25.924			14.521	-3.257			21.758	-24.319			20.3009	-1.999			21.758	-24.319
		12.339	40.798			21.826	-25.937			14.547	-3.199			21.798	-24.433			20.3382	-2.182			21.798	-24.433
		12.348	40.285			21.866	-25.923			14.574	-3.322			21.838	-20.954			20.3754	-2.585			21.838	-20.954
		12.357	39.68			21.906	-25.774			14.601	-3.479			21.878	-12.445			20.4127	-3.286			21.878	-12.445
		12.366	39.14			21.946	-25.625			14.627	-3.405			21.918	5.191			20.4499	-3.832			21.918	5.191
		12.375	38.652			21.986	-25.868			14.654	-3.435			21.958	26.328			20.4872	-4.208			21.958	26.328
		12.384	38.077			22.026	-25.875			14.68	-3.32			21.998	31.428			20.5244	-5			21.998	31.428
		12.393	37.452			22.066	-25.664			14.707	-3.442			22.038	26.543			20.5617	-5.337			22.038	26.543
		12.402	36.953			22.106	-25.554			14.734	-3.353			22.078	24.128			20.5989	-5.662			22.078	24.128
		12.411	36.483			22.146	-25.579			14.76	-3.399			22.117	23.485			20.6362	-5.851			22.117	23.485
		12.42	35.865			22.186	-25.714			14.787	-3.43			22.157	23.318			20.6734	-5.791			22.157	23.318
		12.429	35.413			22.226	-25.577			14.814	-3.541			22.197	23.199			20.7107	-5.903			22.197	23.199
		12.438	34.91			22.266	-25.482			14.84	-3.486			22.237	23.093			20.7479	-5.672			22.237	23.093
		12.447	34.276			22.306	-25.45			14.867	-3.45			22.277	23.037			20.7852	-5.477			22.277	23.037
		12.456	33.782			22.346	-25.621			14.894	-3.568			22.317	22.999			20.8224	-5.021			22.317	22.999
		12.465	33.397			22.386	-25.701			14.92	-3.222			22.357	22.944			20.8597	-4.735			22.357	22.944
		12.474	32.973			22.426	-25.646			14.947	-3.112			22.397	22.91			20.8969	-4.366			22.397	22.91
		12.483	32.531			22.466	-24.918			14.974	-3.004			22.437	22.84			20.9342	-4.301			22.437	22.84
		12.492	32.184			22.506	-25.359			15	-2.931			22.477	22.791			20.9714	-4.096			22.477	22.791
		12.501	31.814			22.546	-25.457			15.027	-3.063			22.517	22.752			21.0087	-3.951			22.517	22.752
		12.51	31.246			22.586	-25.508			15.053	-2.901			22.557	22.686			21.0459	-3.759			22.557	22.686
		12.519	30.878			22.626	-25.657			15.08	-2.923			22.597	22.651			21.0832	-4.097			22.597	22.651
		12.528	30.464			22.665	-25.559			15.107	-3.16			22.636	22.641			21.1204	-4.029			22.636	22.641
		12.537	29.875			22.705	-25.844			15.133	-2.874			22.676	22.601			21.1577	-4.063			22.676	22.601
		12.546	29.411			22.745	-25.897			15.16	-2.886			22.716	22.542			21.1949	-3.96			22.716	22.542
		12.555	28.997			22.785	-26.067			15.187	-3.077			22.756	22.541			21.2322	-3.561			22.756	22.541
		12.564	28.528			22.825	-26.103			15.213	-2.983			22.796	22.52			21.2694	-4.017			22.796	22.52
		12.573	28.087			22.865	-26.086			15.24	-3.288			22.836	22.499			21.3067	-4.242			22.836	22.499
		12.582	27.764			22.905	-26.106			15.267	-3.447			22.876	22.465			21.3439	-4.249			22.876	22.465
		12.591	27.384			22.945	-25.985			15.293	-3.504			22.916	22.477			21.3812	-4.099			22.916	22.477
		12.6	26.872			22.985	-26.041			15.32	-3.412			22.956	22.437			21.4184	-4.06			22.956	22.437
		12.609	26.468			23.025	-26.051			15.347	-3.445			22.996	22.43			21.4557	-4.017			22.996	22.43
		12.618	26.08			23.065	-26.203			15.373	-3.641			23.036	22.423			21.4929	-3.879			23.036	22.423
		12.627	25.654			23.105	-26.179			15.4	-3.628			23.076	22.445			21.5302	-3.998			23.076	22.445
		12.636	25.365			23.145	-26.3			15.426	-3.589			23.116	22.445			21.5674	-3.964			23.116	22.445
		12.645	25.122			23.185	-26.401			15.453	-3.449			23.155	22.423			21.6047	-3.725			23.155	22.423
		12.654	24.806			23.225	-26.037			15.48	-3.557			23.195	22.441			21.6419	-3.535			23.195	22.441
		12.663	24.458			23.265	-26.319			15.506	-3.765			23.235	22.478			21.6791	-3.382			23.235	22.478
		12.672	24.166			23.305	-26.016			15.533	-3.802			23.275	22.486			21.7164	-3.656			23.275	22.486
		12.681	23.792			23.345	-26.075			15.56	-3.815			23.315	22.522			21.7536	-3.661			23.315	22.522
		12.69	23.191			23.385	-26.14			15.586	-3.747			23.355	22.578			21.7909	-3.563			23.355	22.578
		12.699	22.786			23.425	-26.266			15.613	-3.676			23.395	22.617			21.8281	-3.763			23.395	22.617
		12.708	22.414			23.465	-26.254			15.64	-3.612			23.435	22.669			21.8654	-3.815			23.435	22.669
		12.717	22.024			23.505	-25.969			15.666	-3.717			23.475	22.732			21.9026	-3.754			23.475	22.732
		12.726	21.836			23.545	-26.115			15.693	-3.766			23.515	22.81			21.9399	-3.693			23.515	22.81
		12.735	21.708			23.585	-26.129			15.72	-3.788			23.555	22.896			21.9771	-3.803			23.555	22.896
		12.744	21.485			23.625	-26.017			15.746	-3.71			23.595	22.966			22.0144	-4.057			23.595	22.966
		12.753	21.202			23.665	-26.075			15.773	-3.771			23.635	23.085			22.0516	-3.968			23.635	23.085
		12.762	20.94			23.705	-26.036			15.799	-3.936			23.674	23.144			22.0889	-3.926			23.674	23.144
		12.771	20.636			23.745	-26.356			15.826	-3.998			23.714	23.147			22.1261	-3.98			23.714	23.147
		12.78	20.285			23.785	-26.35			15.853	-4.037			23.754	23.198			22.1634	-3.944			23.754	23.198
		12.789	20.085			23.825	-26.504			15.879	-3.852			23.794	23.227			22.2006	-3.489			23.794	23.227
		12.798	19.785			23.865	-26.487			15.906	-3.78			23.834	23.237			22.2379	-4.23			23.834	23.237
		12.807	19.426			23.905	-26.377			15.933	-3.977			23.874	23.21			22.2751	-4.223			23.874	23.21
		12.816	19.129			23.945	-26.487			15.959	-3.874			23.914	23.187			22.3124	-4.279			23.914	23.187
		12.825	18.869			23.985	-26.689			15.986	-3.506			23.954	23.277			22.3496	-4.16			23.954	23.277
		12.834	18.628			24.025	-26.57			16.013	-3.425			23.994	23.584			22.3869	-4.36			23.994	23.584
		12.843	18.433			24.065	-26.551			16.039	-3.461			24.034	23.985			22.4241	-4.14			24.034	23.985
		12.852	18.246			24.105	-26.66			16.066	-3.431			24.074	24.373			22.4614	-3.83			24.074	24.373
		12.861	17.944			24.145	-26.588			16.093	-3.515			24.114	24.49			22.4986	-4.055			24.114	24.49
		12.87	17.59			24.185	-26.639			16.119	-3.514			24.154	24.252			22.5359	-3.988			24.154	24.252
[truncated: 371 more rows]

[truncated: 13 more sheets: Supplementary Fig. 3Ci, Supplementary Fig. 3Cii, Supplementary Fig. 3Ciii, Supplementary Fig. 3Civ, Supplementary Fig. 3D, Supplementary Fig. 8D, Supplementary Fig. 8E, Supplementary Fig. 8F, Supplementary Fig. 9C, Supplementary Fig. 9D, Supplementary Fig.10B, Supplementary Fig. 10J, Supplementary Fig. 10K]
